# Supplementary material for: High-throughput functional annotation of natural products by integrated activity profiling
Source: PubMed Central journal article supplement (PMC9894231; doi:10.1073/pnas.2208458119), 2022-11-30
Supplement: pnas.2208458119.sapp.pdf [file pnas.2208458119.sapp.pdf]

## Supplementary Information for

### High-Throughput Functional Annotation of Natural Products by Integrated Activity Profiling

*Suzie K. Hight<sup>1,8</sup>, Trevor N. Clark<sup>2</sup>, Kenji L. Kurita<sup>2,6</sup>, Elizabeth A. McMillan<sup>1</sup>, Walter Bray<sup>3</sup>, Anam F. Shaikh<sup>4</sup>, Aswad Khadilkar<sup>3</sup>, F. P. Jake Haeckl<sup>2</sup>, Fausto Carnevale-Neto<sup>2</sup>, Scott La<sup>3</sup>, Akshar Lohith<sup>3</sup>, Rachel M. Vaden<sup>1</sup>, Jeon Lee<sup>5</sup>, Shuguang Wei<sup>4</sup>, R. Scott Lokey<sup>3</sup>, Michael A. White<sup>1,7\*</sup>, Roger G. Linington<sup>2\*</sup>, John B. MacMillan<sup>3,4\*</sup>*

\*Corresponding authors: Michael White; Roger Linington; John Macmillan

Email: Michael White [mikewhite3224@gmail.com](mailto:mikewhite3224@gmail.com); Roger Linington [rliningt@sfu.ca](mailto:rliningt@sfu.ca); John Macmillan [jomacmil@ucsc.edu](mailto:jomacmil@ucsc.edu)

#### **This PDF file includes:**

Supplementary text

Figures S1 to S33 and legends

Tables S1 to S6

SI References

#### **Other supplementary materials for this manuscript include the following:**

Dataset S1: List of all Selleck compounds included in the reference library and their target class annotations.

Dataset S2: Raw gene expression data for parkamycin A.

---

# SUPPORTING INFORMATION

## Contents

|                                                                                                                                                |     |
|------------------------------------------------------------------------------------------------------------------------------------------------|-----|
| Supplementary Note 1: Chemical Libraries .....                                                                                                 | 3   |
| Supplementary Note 2: Metabolomics .....                                                                                                       | 6   |
| Supplementary Note 3: Bioassays .....                                                                                                          | 8   |
| Supplementary Note 4: Statistical analysis .....                                                                                               | 12  |
| Supplementary Note 5: Compound isolation .....                                                                                                 | 14  |
| Supplementary Note 6: Parkamycins A/B isolation, structure elucidation, and NMR table .....                                                    | 16  |
| Supplementary Figure 1: Selleck library target class membership. ....                                                                          | 21  |
| Supplementary Figure 2: Pearson correlation distributions in FUSION and CP. ....                                                               | 22  |
| Supplementary Figure 3: Venn diagrams illustrating overlap among target classes identified as significantly enriched in a k-means cluster..... | 23  |
| Supplementary Figure 4: Annotated heatmaps showing which target classes are significantly enriched in k-means clusters. ....                   | 24  |
| Supplementary Figure 5. Alluvial diagrams for each target class using k-means clustering of the FUSION and CP datasets. ....                   | 25  |
| Supplementary Figure 6. Alluvial diagrams for each cluster in FUSION and each cluster in CP.....                                               | 55  |
| Supplementary Figure 7: Adapted similarity network fusion workflow. ....                                                                       | 115 |
| Supplementary Figure 8: CDF plots comparing pairwise associations between in-class and out-of-class associations .....                         | 116 |
| Supplementary Figure 9: “Dead” Compounds in CP and FUSION cluster together in the SNF-Euclidean APC map .....                                  | 190 |
| Supplementary Figure 10. Affinity propagation clustering map of the SNF-pearson network.....                                                   | 191 |
| Supplementary Figure 11: Bokeh Server demonstration of functionality. ....                                                                     | 194 |
| Supplementary Figure 12. Density distributions of SNF scores for unique metabolites in the natural product fraction library.....               | 195 |
| Supplementary Figure 13: Compound Activity map for combined SNF profiles and untargeted metabolomics features. ....                            | 196 |
| Supplementary Figure 14: Signatures from natural product fractions containing trichostatin A.....                                              | 197 |

|                                                                                                                                                                     |     |
|---------------------------------------------------------------------------------------------------------------------------------------------------------------------|-----|
| Supplementary Figure 15. Signatures from natural product fractions containing surugamide.....                                                                       | 198 |
| Supplementary Figure 16. Signatures from natural product fractions containing parkamycin A.....                                                                     | 199 |
| Supplementary Figure 17. <sup>1</sup> H NMR of parkamycin A.....                                                                                                    | 200 |
| Supplementary Figure 18. <sup>13</sup> C NMR of parkamycin A.....                                                                                                   | 201 |
| Supplementary Figure 19. HSQC NMR spectrum of parkamycin A.....                                                                                                     | 202 |
| HSQC NMR spectrum collected at 600 MHz in DMSO-d6.....                                                                                                              | 202 |
| Supplementary Figure 21. Expanded HSQC NMR spectrum of parkamycin A, region 2. ....                                                                                 | 204 |
| Supplementary Figure 22. COSY NMR spectrum of parkamycin A.....                                                                                                     | 205 |
| Supplementary Figure 23. HMBC NMR spectrum of parkamycin A.....                                                                                                     | 206 |
| Supplementary Figure 24. Expanded HMBC NMR spectrum of parkamycin A, region 1. ....                                                                                 | 207 |
| Supplementary Figure 25. Expanded HMBC NMR spectrum of parkamycin A, region 2. ....                                                                                 | 208 |
| Supplementary Figure 26. <sup>15</sup> N-HMBC NMR spectrum of parkamycin A.....                                                                                     | 209 |
| Supplementary Figure 27. <sup>1</sup> H NMR spectrum of parkamycin B (semi pure).....                                                                               | 210 |
| Supplementary Figure 28. <sup>13</sup> C NMR spectrum of parkamycin B (semi pure).....                                                                              | 211 |
| Supplementary Figure 29. HSQC NMR spectrum of parkamycin B (semi pure).....                                                                                         | 212 |
| Supplementary Figure 30. HMBC NMR spectrum of parkamycin B (semi pure). ....                                                                                        | 213 |
| Supplementary Figure 31. Volcano plot displaying differential gene expression in the Nanostring metabolism panel after treatment with RLUS-2088 (Parkamycin A)..... | 214 |
| Supplementary Figure 32. Metabolic pathway analysis on gene expression data collected after parkamycin treatment. ....                                              | 215 |
| Supplementary Figure 33. Comparison of pathway scores for select pathways altered with RLUS2088 (Parkamycin-A) treatment compared to DMSO.....                      | 216 |
| Supplementary Table 1. Selleck library target representation.....                                                                                                   | 217 |
| Supplementary Table 2: K-means cluster membership in FUSION and CP for compounds in the top 30 largest target classes. ....                                         | 222 |
| Supplementary Table 3: SNF-Euclidean APC hypergeometric test p-values. ....                                                                                         | 237 |
| Supplementary Table 4: Target class enrichment in APC clusters .....                                                                                                | 240 |
| Supplementary Table 5: Cluster #49 members.....                                                                                                                     | 241 |
| Supplementary Table 6: Differential expression of top 20 genes in the Nanostring metabolism panel. ....                                                             | 242 |

## Supplementary Note 1: Chemical Libraries

### Selleck Library

The reference library is a set of 2027 molecules spanning 196 compound classes, with 789 compounds not belonging to any annotated class. The library was purchased from Selleck as a premade library, combining compounds from the Bioactive, Kinase Inhibitor, and FDA-approved drug libraries. The compounds were formatted into two sets of 384 well plates at 10 mM and 2 mM.

### Natural product libraries

Two natural product libraries were utilized in this study. The MacMillan lab collection used in this study was comprised of ~500 fractions derived from 25 marine-derived bacterial strains. The library of microbial natural product fractions was derived from marine-derived Actinomycetes (20), Firmicutes (5). These bacteria were cultivated from marine sediment samples collected in Tonga, the Gulf of Mexico (Texas, Louisiana), estuaries in South Carolina, and the Bahamas. A variety of techniques were utilized to isolate strains, including the use of nutrient-limited isolation media, such as those composed of only humic or fulvic acid, the use of small-molecule signaling compounds (N-acylhomoserine lactones, siderophores) that mimic the natural environment of the bacteria of interest, and isolation of spores using density gradient ultracentrifugation. Selection of bacterial isolates was carried out based on morphological appearance and followed up by phylogenetic characterization using 16S rRNA analysis using the Universal 16S rRNA primers FC27 and RC 1492 for the majority of the phylogenetic analysis. 16S rRNA sequences were compared to sequences in available databases using the Basic Local Alignment Search Tool.

To generate the fraction library used in this study, bacterial strains were fermented in 5 × 2.8 L Fernbach flasks each containing 1 L of a seawater based medium (10 g starch, 4 g yeast extract, 2 g peptone, 1 g CaCO<sub>3</sub>, 40 mg Fe<sub>2</sub>(SO<sub>4</sub>)<sub>3</sub>·4H<sub>2</sub>O, 100 mg KBr) and shaken at 200 rpm for seven days at 27 °C. After seven days of cultivation, XAD7-HP resin (20 g/L) was added to adsorb the organic products, and the culture and resin were shaken at 200 rpm for 2 h. The resin was filtered through cheesecloth, washed with deionized water, and eluted with acetone to give a crude extract, with an average yield of 2.0 g of crude extract/strain. Further fractionation of the bacterial crude extracts (~500 mg) was accomplished using an Isco medium pressure automatic purification system (equipped with UV and ELSD detectors) using reversed phase C18 chromatography (gradient from 90:10 H<sub>2</sub>O:CH<sub>3</sub>CN to 0:100 H<sub>2</sub>O:CH<sub>3</sub>CN over 25 minutes, RediSep Rf Gold High Performance column with 600 mg capacity). Fermentation of each bacterial strain gives rise to a total of either 10 or 20 natural product fractions/strain. All natural product fractions in the library are standardized to a concentration of 10 mg/mL in DMSO. All fractions have been analyzed by low resolution LC/MS using an Agilent Model 6130 single quadrupole instrument.

Due to the nature of the fractionation approach, there is by design, the potential for sequential fractions to contain the same compounds. For example, if the peak for staurosporine is split between fraction 6 and 7, one could expect to have a similar biological signature between the sequential fractions.

The Linington natural product fraction library contains >5000 microbial fractions. The library is comprised of extracts of marine sediment-derived bacterial strains isolated by the Linington laboratory over the past 10 years. The library contains a cross section of Gram-positive genera, enriched in Actinobacterial strains. These sediments were collected by hand using SCUBA from over 70 discrete dive sites on the west coast of the United States and Canada. Collection sites include locations from the Channel Islands (near Los Angeles, CA) to the San Juan Islands in northern Washington state and sites on Vancouver Island, and are part of one of the largest systematic sampling campaigns for marine microbial chemistry performed in this area. Samples were collected with 15-mL centrifuge tubes and isolates were obtained from one of 8 selection media each supplemented with 50 mg of nalidixic acid and cycloheximide. Selective media listed below which end in "F" contain 1 L of MilliQ water and media ending in "S" contain 750 mL of 0.2  $\mu\text{m}$ -filtered seawater, and 250 mL of MilliQ water to a total volume of 1 L. These media are as follows: actinomycete isolation agar (AIF and AIS, Difco™), SNF and SNS<sup>1</sup>, NTF and NTS, and HVF and HVS<sup>2</sup>. Plates were incubated at room temperature until the appearance of desired colony morphologies consistent with actinobacteria. Colonies were picked which displayed characteristic actinobacterial morphologies and were subcultured onto either MB (37.4 g Difco™ Marine Broth, 18 g agar, 1 L Milli-Q water) or A1 (18 g agar, 20 g starch, 10 g glucose, 5 g yeast extract, 5 g NZ-amine, 1 g CaCO<sub>3</sub>, 50 mg nalidixic acid, 50 mg cycloheximide, 31.2 g Instant Ocean, 1 L Milli-Q water) agar plates.

Isolates were inoculated from MB (18 g agar, 37.4 g marine broth (Difco™), 1 L MilliQ water) or A1 (18 g agar, 20 g soluble starch, 10 g glucose, 5 g yeast extract, 5 g NZ-amine, 1 g CaCO<sub>3</sub>, 1 L MilliQ water) agar plates into 7 mL of modified SYP (mSYP) liquid media (10 g starch, 4 g peptone, 2 g yeast extract, 1 L Milli-Q water, 31.2 g Instant Ocean® sea salt) in 25 x 150 mm glass culture tubes for 2-3 days at room temperature with shaking at 200 rpm. These small-scale cultures were shaken at 25°C and 200 rpm for a minimum of three days before moving to 60-mL medium-scales. Cultures were stepped up to medium-scale by inoculating 3 mL of the small-scale culture into 60 mL of freshly prepared mSYP in wide-mouthed 250-mL Erlenmeyer flasks with small springs. Medium-scale cultures were shaken at 25°C and 200 rpm for 3-7 days. Large scale cultures were prepared by inoculating 40 mL of medium-scale culture into 1 L of freshly prepared mSYP in 2.8-L Fernbach flasks with a large spring and 20 g of pre-washed Amberlite XAD-16 adsorbent resin (DCM, MeOH, and water; Sigma). Large-scale cultures were shaken at 25°C and 200 rpm for 7-10 days. At the end of the fermentation period, cells and resin were separated from the culture medium by vacuum filtration using a Whatman® glass microfiber filter and washed with deionized water. Resin and cells from each culture flask were extracted with 250 mL of 1:1 DCM/MeOH. The organic

extract was separated from the cells and resin by vacuum filtration and concentrated *in vacuo*.

Crude organic extracts from marine-derived actinobacteria were subjected to solid phase extraction using a Supelco-Discovery C18 cartridge (5 g) and eluted using a MeOH/H<sub>2</sub>O step gradient (40 mL; 10% MeOH, 20% MeOH, 40% MeOH, 60% MeOH, 80% MeOH, 100% MeOH, 100% EtOAc) to afford seven fractions. The 10% MeOH fraction was discarded and the remaining six (fractions A – F) concentrated to dryness *in vacuo*. Dry pre-fractions were resolubilized in 1 mL of dimethyl sulfoxide (DMSO) and transferred to deep-well 96-well plates for long-term storage at -70°C.

For biological analysis, DMSO stocks of library fractions were thawed, sonicated, and reformatted to 384-well format for high-throughput screening.

For mass spectrometry analysis, DMSO stocks of library fractions were thawed, sonicated, and diluted 1:20,000 (5:200 DMSO, 10:240 50% MeOH/H<sub>2</sub>O, 10:200 50% MeOH/H<sub>2</sub>O) with mixing in 96-well format. Plates were reformatted into 384-well format, sealed, centrifuged at 1000 rpm for 30s, and analyzed.

## Supplementary Note 2: Metabolomics

### *Data-Independent (DIA) UPLC-MS/MS Data Acquisition*

All measurements were performed with an Acquity UPLC H-Class (Waters) using an HSS T3 C18, 100 mm × 2.1 mm, 1.7 μm column (Waters). Separation of 5 μL sample was achieved by a gradient of (A) H<sub>2</sub>O + 0.01% FA to (B) MeCN + 0.01% FA at a flow rate of 500 μL/min and 45°C for 7.5 min (5% MeCN, 0-0.3 min; 5-90% MeCN, 0.3-4.7 min; 90-98% MeCN, 4.7-5.5 min; 98% MeCN, 5.5-5.8 min; 5% MeCN, 5.81-7.5 min). The LC flow was directly infused into a Synapt G2-Si operated in positive ion mode. Analysis was conducted using the HDMS<sup>E</sup> mode which was set to alternate between collision energies of 0eV and 30eV every 0.3 sec. The instrument was operated in electrospray mode with 20 μg/mL leucine enkephalin lockspray infusion enabled every 10 seconds. Mass spectra were acquired from 50-1500 *m/z* at a 2Hz scan rate in continuum mode without lockmass correction.

### *Data Processing*

All samples were analyzed in triplicate for downstream processing. All samples were measured as 384-well plate batches. Measurements were performed over the course of 7 months. Measurements for each 384-well plate were performed within two weeks of each other, with all replicates of a single 384-well plate batch measured before moving on to the next set of samples. The instrument was mass calibrated and collisional-cross section (CCS) calibrated using MajorMix (Waters) between every 384-well set of samples run. The average *m/z* error was never greater than 0.9 ppm for the calibrant signals prior to acquisition.

### Metabolomics processing pipeline

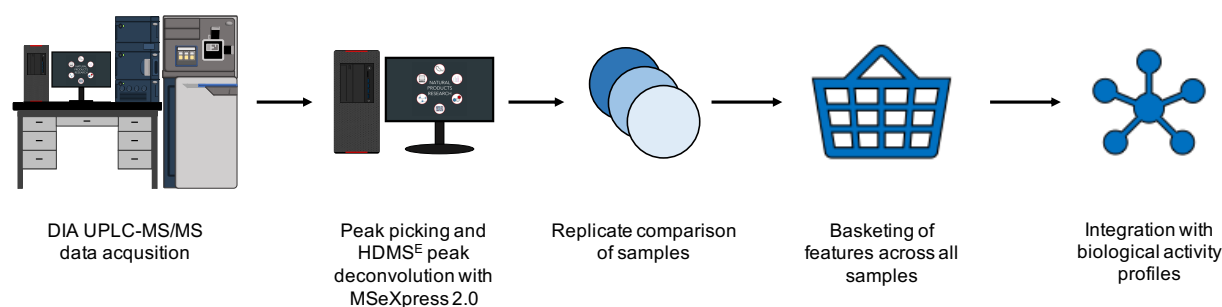

All raw data files were processed using a customized workflow developed in collaboration with Waters. The initial peak detection and HDMS<sup>E</sup> deconvolution software package MSeXpress 2.0 was employed to generate peak lists of precursor ions with their associated product ions for each sample. To ensure the validity of signals across replicates, another custom Python script (replicate comparison) removed any *m/z* feature that was not present in at least two of three analytical replicates within 0.03 Da and 0.05 min. Finally, all replicate-compared samples were basketed to give the distribution of all

features across the sample set. Features within 0.03 Da and 0.05 min baskets were collapsed to single features, annotated by the samples in which they appear. Features that appeared in solvent blanks were removed prior to bioactivity integration in the Jupyter notebook.



## Supplementary Note 3: Bioassays

### Cytological Profiling

#### General

Briefly, HeLa cells were cultured and seeded into 384-well at 2,500 cells/well. After a 24-hour incubation, cells were pinned with test fractions (or pure compounds) using a Janus MDT robot (PerkinElmer). Two stain sets were used; Stain set 1: Hoechst, EdU-rhodamine, and anti-Phosphohistone H3, Stain Set 2: Hoechst, FITC-alpha tubulin, and rhodamine-phalloidin. For stain set 1, cells were incubated with 20  $\mu\text{M}$  EdU for 1 h prior to fixing in 4 % formaldehyde solution in PBS for 20 min. Cells were then washed with PBS and permeabilized with 0.5% Triton-X in PBS for 10 min before blocking with 2% BSA-PBS solution for at least 1 h. Following this, cells were incubated with primary antibodies overnight at 4°C. The following day, excess primary antibody was washed off with PBS and secondary antibodies and Hoechst solution were incubated for 1 h. Plates were washed with PBS and preserved with 0.1% sodium azide in PBS solution prior to imaging. For stain set 2, cells were fixed with a 4% formaldehyde solution in PBS for 20 min. Cells were then washed with PBS and permeabilized with 0.5% Triton-X in PBS for 10 min before blocking with 2% BSA-PBS solution for at least 1 h. Following this, cells were incubated with primary antibodies overnight at 4°C. After blocking the cells were washed and incubated with FITC conjugated anti-alpha tubulin antibody overnight at 4°C. The following day the cells are washed and then incubated with rhodamine-phalloidin and Hoechst stain for 20 minutes. The cells were then given one final wash before imaging.

Selleck chemicals were screened at both 50  $\mu\text{M}$  and 10  $\mu\text{M}$  in CP. In the downstream analysis, signatures that were inactive in the 10  $\mu\text{M}$  dose were replaced with the signature obtained from 50  $\mu\text{M}$  treatment. Otherwise the signature produced at 10  $\mu\text{M}$  was used for downstream analysis. Macmillan natural product fractions were screened at 10  $\mu\text{g}/\text{mL}$ , and Linington natural product fractions were screened at 1000 x dilution from stock. NPFs that were cytotoxic in initial screening were run in 8 pt. 3-fold dilutions starting from 50  $\mu\text{g}/\text{ml}$  to obtain active but not dead CP signatures. CP signatures of the first NPF dilutions that was within three SDs of the mean control cell count replaced the initial 50  $\mu\text{g}/\text{ml}$  signatures and contributed CP data for SNF merging.

#### Imaging and Analysis

Two images per well were captured with an ImageXpress Micro XLS automated epifluorescent microscope (Molecular Devices, Sunnyvale). Images were then processed as previously described<sup>3</sup>. Briefly, initial image processing was performed using MetaXpress image analysis software, using built-in morphometry metrics, the multiwavelength cell scoring, transfluor, and micronuclei modules. Custom written scripts were used to compare the treated measurements with the measurements of the DMSO control wells, and then convert each feature to a “histogram difference” (HD) score. This produced a 408-feature vector fingerprint which was then reduced to 251 features using

additional feature reduction steps. Uninformative features with zero standard deviation across all perturbations were removed. In addition, redundancy was further reduced using the find Correlation function in the R-package caret (version 6.0-79; R-version 3.3.3). Briefly, all feature pairs with Pearson correlation coefficients greater than 0.95 were flagged and the member of each pair with the highest mean correlation to all other features was removed, resulting in the final 251-feature CP fingerprint. Compound treatment wells were labeled as 'dead' if the cell count for the treatment well was < 10% of the Median cell Count in the treatment plate. This resulted in 31 compounds and NPFs to be labeled as 'dead'. CP scores were calculated as the square-root of the sum of the squares of the CP features.

$$CPscore = \sqrt{\sum_{i=feature\ 1}^{n\ features} x_i^2}$$

## FUSION

### Assay and data processing

All perturbagens were screened in triplicate in the human lung cancer cell line NCI-H23 in 384-well microtiter plate format. Cells were seeded at a density of 5000 cells/well in either 50 or 60  $\mu$ L of RPMI containing 5% FBS and 1000 U/mL Penicillin-Streptomycin (ThermoFisher). The next day, cells were treated with natural product fraction extract (10  $\mu$ g/mL from the Macmillan library, and 1000x dilution from the Linington library) or Selleck chemicals (10  $\mu$ M) using an Echo 555 Liquid Handler (Labcyte; Sunnvale, CA). After 24 hours of incubation, QuantiGene Plex 2.0 Assay Lysis Mixture (ThermoFisher) with 10  $\mu$ L/mL proteinase K was added to each well for a final media:Lysis Mixture ratio of 2:1. Cells were lysed at 54°C for 30 min, and then stored at -80°C.

The FUSION assay concept was described previously<sup>4</sup>. We extended this concept to a lung cancer context by selecting a new set of genes that can report on the physiological state of lung cancer cell lines in particular. Expression of 14 dynamic reporter genes (*DUSP6*, *FAM3C*, *GCNT3*, *GRHL2*, *HSD17B7*, *KIAA0922*, *LCN2*, *LTBR*, *RRM2*, *SIRPA*, *TLE2*, *TMEM30B*, *WSB2*, *YAP1*) and 2 static reporter genes (*EEF1A1*, *SIRT6*) were detected using a 16-plex QuantiGene Plex 2.0 Assay (ThermoFisher). Using a panel of four different sets of 16-plex magnetic and fluorescent beads allowed 4 experiments to be multiplexed into each well, for a final plex of 4 experiments x 16 genes = 64 measurements. An aliquot of cell lysate (~44-47% of the original volume) was then transferred to V-bottom 384-well plates and incubated with bead and hybridization probe mixes at 54°C in a MaxQ 4450 benchtop orbital shaker at 300 rpm for a minimum of 18 hours. After hybridization, samples were 4-plexed by bead set into flat-bottom 384-well plates using a Biomek robotic liquid handler and 384-well plate magnet. Plates were washed in Quantigene Assay Wash Buffer using an ELx405 CW plate washer with a 384-well plate magnet. The signal was then amplified per manufacturer's protocol using pre-amplifier, amplifier, biotin label, at a ratio of 7.5  $\mu$ L/mL Label Probe Diluent, and

streptavidin-phycoerythrin reagents at a ratio of 7.5  $\mu\text{L}/\text{mL}$  SAPE Diluent. Plates were then washed in SAPE Wash Buffer and read on a Flexmap 3D (Luminex).

FUSION gene expression data is processed first by deconvolution into bead sets, and then normalizing the raw median fluorescence intensity (MFI) value for each gene to the median MFI of that gene on a plate-by-plate basis. To control for cell number, each gene is normalized to the geometric mean of the static controls (*EEF1A1* and *SIRT6*) on a well-by-well basis. Expression values which are  $> 2x$  the standard deviation of all values for that gene are then filtered out to eliminate spurious outliers, and only perturbagens with at least 2 replicate values for each gene are processed further. Gene signatures are then normalized to the median of “no treatment” control wells on a plate-by-plate basis, collapsed to the median of each gene, and  $\log_2$  transformed to obtain the final FUSION signature. Perturbagens were flagged as ‘dead’ in the FUSION dataset if the geometric mean of the plate-median normalized MFI values for *EEF1A1* and *SIRT6* was  $\leq 8$ .

## **Compound activity assessment**

### **Immunoblot analysis**

H23 cells were plated in 6-well format at a density of 150,000 cells/well and allowed to incubate overnight before drug treatment. Upon 24 hour drug treatment, cells were lysed in 1% Triton X-100 buffer mixed with 1X protease and phosphatase inhibitor cocktails (Thermo Scientific). 20  $\mu\text{g}$  of each lysate was loaded and electrophoresed on a 10% SDS-PAGE gel (Bio-Rad) and transferred to a PVDF membrane using the Trans-blot turbo transfer system (Bio-Rad). After blocking with Starting Block (PBS) Blocking Buffer (Thermo Scientific), membranes were probed overnight with primary antibodies diluted at 1:1,000 at 4°C according to manufacturer recommendations. Antibodies against GAPDH (#5174), Rb (# 9309), p-Rb (# 8516) were purchased from Cell Signaling Technology. After washing and incubation with the secondary antibody (HRP-conjugated anti-mouse and anti-rabbit IgG antibodies, Jackson ImmunoResearch), protein signals were visualized with ECL Select detection solution (Amersham). GAPDH was used as whole cell lysate loading control.

### **Gene expression assay after parkamycin treatment**

H23 cells were seeded in 6 well plates, 24 h later dosed with DMSO (0.1 %) or RLUS-2088 (10  $\mu\text{M}$ ) in DMSO and incubated for 6 h. Cells were lysed and RNA was extracted with Monarch Total RNA Miniprep kit according to manufacturer’s instructions (Catalog T2010S). RNA and yield determined using Nanodrop ND-100 spectrophotometer (ThermoFisher). RNA integrity was determined using Agilent Tape station 4150 (Agilent Technologies, Seattle WA) (RIN  $> 8.5$ ). 100 ng of RNA was hybridized with Human Metabolic Pathways Panel XT-CSO-HMP1-12. Briefly, 70  $\mu\text{l}$  of hybridization buffer was added to Reporter CodeSet to prepare the master mix. To set up the hybridization

reactions, each sample tube contained 8  $\mu$ l of master mix and 5  $\mu$ l of diluted RNA sample. Capture ProbeSet (2  $\mu$ l) was added to each tube and samples were hybridized at 65°C for 18 hours. Samples were processed on an nCounter MAX GEN2 prep station and digital analyzer. Quality control of nCounter data, data normalization and gene expression differences were performed using nSolver and Advanced Analysis Version 2.0.

## Supplementary Note 4: Statistical analysis

### Similarity Network Fusion (SNF) Methodology

SNF is a novel similarity metric designed to aggregate information across multiple datasets and assign a similarity score to perturbations based on evidence from multiple datasets. SNF was performed as previously described<sup>5</sup>, with some modifications (Supplementary Figure 1). Briefly, similarity within a dataset was first calculated. For perturbations  $i$  and  $j$ , similarity within a single dataset is calculated as:

$$W(i, j) = \exp\left(-\frac{\rho^2(x_i, x_j)}{\mu \varepsilon_{i, j}}\right)$$

where  $w_{i,j}$  gives the scaled similarity and  $\rho(x_i, x_j)$  gives a similarity score (i.e., Euclidean distances) between perturbations  $i$  and  $j$  in one dataset. For Euclidean distances we used the `dist2` function in the `SNFtool` package. For Pearson correlations, the distance matrix function from the R package `ClassDiscovery` was used to calculate a Pearson distance similarity matrix.  $W$  is calculated for each input dataset to be fused with SNF. The  $\mu$  value is a hyperparameter that is empirically set and  $\varepsilon$  is used to eliminate the scaling problem.  $\varepsilon$  is given as:

$$\varepsilon_{i, j} = \frac{\text{mean}(\rho(x_i, N_i)) + \text{mean}(\rho(x_j, N_j)) + \rho(x_i, x_j)}{3}$$

To compute similarity across multiple sources of data with different scales of measurement a normalized weight matrix,  $P$ , was defined where  $P = D^{-1}W$  where  $D$  is the diagonal matrix whose entries  $D(i, i) = \sum_j W(i, j)$ . From here, K-nearest neighbors was used to measure self-similarities as follows:

$$S(i, j) = \begin{cases} \frac{W(i, j)}{\sum_{k \in N_i} W(i, k)}, & j \in N_i \\ 0 & \text{otherwise} \end{cases}$$

In this step, the k-nearest neighbors to a perturbation will be assigned similarity scores and the others will be set to zero. We found this step to be critical in introducing errors into the similarity measures for our purposes. Setting the similarity value to zero for similarity measures outside the k-nearest neighbors (KNN) effectively masked perturbation similarity in otherwise significantly similar associations. Thus, we chose to vary  $k$  from  $k=2$  to  $k=n/2$ , where  $n$  is the total number of perturbations in each dataset, and use an agglomerate value of similarity across all  $k$ . Networks were then fused by prorogation information from each dataset into the other according to the following equation:

$$\mathbf{P}_{t+1}^{(1)} = \mathbf{S}^{(1)} \times \mathbf{P}_t^{(2)} \times (\mathbf{S}^{(1)})^T$$

$$\mathbf{P}_{t+1}^{(2)} = \mathbf{S}^{(2)} \times \mathbf{P}_t^{(1)} \times (\mathbf{S}^{(2)})^T$$

P and S are defined above where P carries information about the full similarity network and S carries information about similarity for KNN. The superscripts (1) and (2) indicate similarity in data types 1 or 2 (here FUSION or CP). After each iteration, the P matrices were re-normalized as described above. This process is iteratively updated for t-steps after which the final fused matrix is calculated as:

$$\mathbf{P}^{(c)} = \frac{\mathbf{P}_t^{(1)} + \mathbf{P}_t^{(2)}}{2}.$$

As stated above, we perform SNF individually for values of k varying from k=2 to k=n/2, resulting in n/2-1 matrices total. To compute an aggregate matrix, we first normalize within each matrix by dividing by the maximum non-diagonal value and then take the average value between all matrices to result in a final, fused aggregate similarity matrix. This matrix was then log<sub>10</sub>-transformed and clustered by affinity propagation clustering using either Euclidean distance or Pearson correlation as the similarity metric.

### **Integration of Metabolomics to SNF, CP, and FUSION data**

Integration of the basketed metabolomics data was performed similarly to previous studies<sup>7</sup>. This approach treats every observed MS feature or basket as an individual chemical entity and asks the question, on average, what biological phenotype is expected when cells in the high content assays are treated with compound? It is acknowledged that combinations of multiple bioactive species as well as huge differences in titre are to be expected; however, the simplicity and naivety of the question serves as a reasonable starting point for further investigation.

In practice, each basket is treated as an object and assigned five numeric descriptors or attributes specific to the biological data acquisition: CP Cluster Score, CP Activity Score, FUSION Cluster Score, FUSION Activity Score, and SNF Cluster score. The Activity Score describes the strength or magnitude of the phenotype predicted when a basket is detected in an extract. The Activity Score values were calculated by first computing a numeric average of each of the observed attributes for each independent assay. The magnitude, square root of the sum of the squares, of this average predicted phenotype is the Activity Score. The Cluster Score describes the similarity of the phenotypes observed in the biological assays amongst all natural product extracts in which the basket was detected. The Cluster Score is computed using the NXN similarity matrices from each assay or the combined SNF similarity matrix and is simply the average of the nondiagonal values of the sub NXN matrix consisting of all the natural product fractions containing that basket. These descriptors are then exported as a table that can be used for discovery and visualized using tools such as the custom Bokeh server.

## Supplementary Note 5: Compound isolation

### General

Solvents used for HPLC chromatography were Optima grade and were used without further purification. NMR spectra were acquired on a Bruker 600 MHz Avance II spectrometer equipped with a 5 mm QCI cryoprobe and referenced to residual solvent proton and carbon signals ( $\delta_{\text{H}}$  2.50,  $\delta_{\text{C}}$  39.5 for DMSO-*d*6, or  $\delta_{\text{H}}$  3.31,  $\delta_{\text{C}}$  49.0 for MeOD-*d*4). High-resolution mass spectrometry data were acquired using an electrospray ionization (ESI) accurate-mass time-of-flight (TOF) liquid chromatograph–mass spectrometer (Acquity UPLC H-Class tandem Synapt G2-Si).

### Fermentation, and extraction

Isolate RL12-067-NTF-D (resulting extract SW218953), isolate RL12-121-HVF-C (resulting extract SW218858), and isolate RL12-115-HVF-E (resulting extracts SW218754, SW218755, SW218756) were inoculated from A1 agar plates into 10 mL of modified SYP (mSYP) liquid media (10 g starch, 4 g peptone, 2 g yeast extract, 1 L Milli-Q water, 31.2 g Instant Ocean) in 25 × 150 mm glass culture tubes for 2 days at room temperature with shaking at 200 rpm before moving to 60-mL medium-scale cultures. Cultures were stepped up to medium-scale by inoculating 3 mL of the small-scale culture into 60 mL of freshly prepared mSYP in wide-mouthed 250-mL Erlenmeyer flasks with small springs. Medium-scale cultures were shaken at 25°C and 200 rpm for 3 days. Large-scale cultures were prepared by inoculating 40 mL of medium scale culture into 1 L of freshly prepared mSYP in 2.8-L Fernbach flasks with a large spring and 20 g of pre-washed Amberlite HP-7 adsorbent resin (DCM, MeOH, and water; Sigma). Large scale cultures were shaken at 25°C and 200 rpm for 7 days. At the end of the fermentation period, cells and resin were separated from the culture medium by vacuum filtration using a Whatman® glass microfiber filter and washed with deionized water. Resin and cells from each culture flask were extracted with 250 mL of 1:1 DCM/MeOH. The organic extract was separated from the cells and resin by vacuum filtration and concentrated *in vacuo*.

### Fractionation

Crude organic extracts were subjected to solid phase extraction using a Teledynelco CombiFlash C18 cartridge (5 g) and eluted using a MeOH/H<sub>2</sub>O step gradient at 20 mL/min (40 mL; 10% MeOH, 20% MeOH, 40% MeOH, 60% MeOH, 80% MeOH, 100% MeOH, 100% EtOAc) to afford seven fractions. The 10% MeOH fraction was discarded and the remaining six (fractions A – F) concentrated to dryness *in vacuo*.

An aliquot (2.6 mg) of SW218953 (60 % MeOH) was found to be pure, providing structure **1** (2.6 mg, trichostatin A). All of fraction (153 mg) SW218858 (80% MeOH) was subjected to RP-HPLC (20 ml/min, 62:38, H<sub>2</sub>O: MeCN with 0.02 % formic acid) using an Atlantis T3 OBD (19 x 250 mm, 5 μm) column to give compound **2** (4.6 mg, surugamide A). All of fraction (96 mg) SW218756 was subjected to RP-HPLC (1.2 ml/min, 55:45, H<sub>2</sub>O:MeCN

with 0.02% formic acid) using a Phenomenex Kinetix C18 (4.6 x 300 mm, 2.6  $\mu$ m) column to give compound **3** (7.9 mg, parkamycin A).

### **Yields**

Approximate yields per liter of fermentation was as follows:

Compound **1**(trichostatin A) = 100 mg/L

Compound **2** (surugamide A) = 4.6 mg/L

Compound **3/4** (parkamycin A/B) = 4.0 mg/L



## Supplementary Note 6: Parkamycins A/B isolation, structure elucidation, and NMR table

*Compound Isolation:* Isolation of Parkamycins A and B was performed via reverse phase HPLC as described above with two clearly separated peaks (12 and 17 minutes, for B then A, respectively). HR-UPLC-MS analysis of each purified peak revealed rapid interconversion to a mixture of the two compounds in both cases, precluding chemical and biological analysis of the pure compounds. To reduce possible thermally mediated interconversion the purification was repeated collecting into test tubes placed in dry ice. However, HR-UPLC-MS analysis of the resulting fractions again revealed rapid interconversion. To reduce photochemically mediated interconversion the purification was repeated a second time in dark conditions, collecting into covered flasks. This resulted in clean separation of the two isomeric products with purities of >95% and >80% respectively based on integration of UV peaks for the two stereoisomers.

*Structure elucidation:* The molecular formula for parkamycin A was determined to be  $C_{26}H_{34}N_2O_5$  from HRESIMS data for the protonated and sodiated adducts (455.2536 and 477.2345 respectively, calcd. 455.2450 and 477.2360) revealing eleven degrees of unsaturation. The  $^1H$  and  $^{13}C$  NMR spectra indicated that the structure contained two carbonyl groups ( $\delta_C$  174.6 and 174.6) and 12 additional  $sp^2$  hybridized centers ( $\delta_C$  121.1, 123.3, 126.2, 127.0, 128.5, 130.0, 130.2, 130.9, 134.7, 137.8, 142.0, and 148.9).  $^1H$  and  $^{13}C$  NMR also revealed 12  $sp^3$  hybridized methylene carbons ( $\delta_C$  24.6, 24.6, 28.4, 28.4, 28.6, 28.7, 30.2, 30.5, 30.6, 31.2, 34.0, and 34.0). Overall, the spectra displayed a high degree of repetition, suggestive of a pseudo-dimeric structure. COSY and HMBC correlations combined with long-range  $^4J_{HH}$  meta-couplings confirmed the presence of two ortho-substituted aromatic rings, accounting for 8 of the degrees of unsaturation and 12 of the 14  $sp^2$  hybridized carbons. COSY and HMBC correlations identified two pendant aliphatic chains, each containing six methylene units and terminating in a carbonyl group.

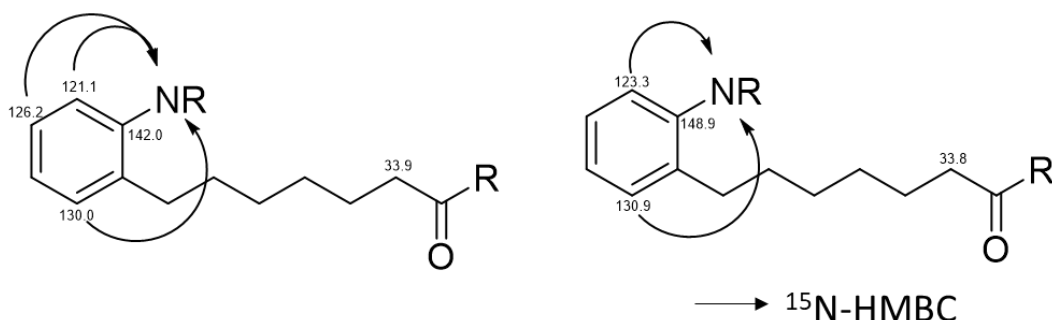

To place the remaining atoms, a  $^{15}N$ -HMBC spectrum was employed to determine the locations of the nitrogen atoms adjacent to each aromatic ring. This left five atoms ( $H_2O_3$ ) remaining, as well as one double bond equivalent. This could be satisfied by either a cyclic compound with the carbonyls connected head to tail with the aryl nitrogen groups, or with an azoxy moiety joining the two aryl subunits and two carboxylic acid

termini. To confirm the presence of the carboxylic acid termini, parkamycin A (0.1 mg) was treated with TMS-diazomethane (100 eq. dissolved in hexanes) in anhydrous methanol (0.5 mL) at room temperature for 15 minutes. LCMS analysis revealed both partial (one conversion of COOH to COOMe (+14 Da)) and complete methylation products (two conversions of COOH to COOMe (+28 Da)) confirming the presence of the two acid termini.

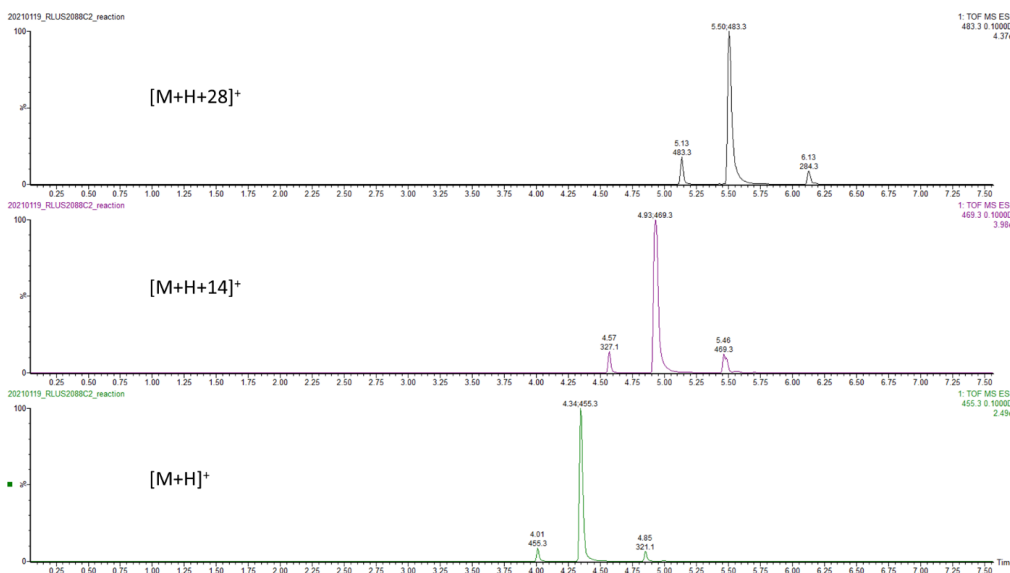

The remaining oxygen atom and double bond equivalent could only be satisfied by the presence of an azoxy moiety between the two aryl rings. This hypothesis was supported by the rapid interconversion between the cis and trans forms upon exposure to sunlight.

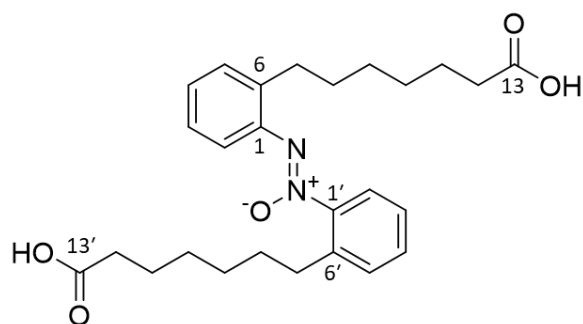

NMR data was acquired on pure parkamycin A for structure elucidation as described above (Figures S17-S26), whereas a sample containing ~85% parkamycin B was used for data collection and assignment of parkamycin B (Figures S27-S30).

Parkamycin A (**3**): UV (MeOH)  $\lambda_{\max}$  (log  $\epsilon$ ) 235 (2.45), 275 (2.31) nm; IR  $\nu_{\max}$  2933, 1710, 1465  $\text{cm}^{-1}$ .  $^1\text{H}$  NMR (DMSO- $d_6$ , 600 MHz)  $\delta$  7.84 (1H, d,  $J$  = 7.1 Hz, H-2'), 7.62 (1H, d,  $J$  = 8.4 Hz, H-2), 7.51 (1H, t,  $J$  = 7.5 Hz, H-4), 7.46 (1H, d,  $J$  = 7.5 Hz, H-5), 7.42 (1H, t,  $J$  = 7.6 Hz, H-3), 7.37 (1H, d,  $J$  = 6.7 Hz, H-5'), 7.32 (2H, m, H-3', H-4'), 2.73 (2H, t,  $J$  = 7.7 Hz, H-7), 2.61 (2H, t,  $J$  = 7.7 Hz, H-7'), 2.11 (4H, m, H-12, H-12'), 1.58 (2H, p,  $J$

=7.2, H-8), 1.50 (2H,  $J = 7.0$ , p, H-8'), 1.43 (4H, m, H-11, H-11'), 1.24 (8H, m, H-9, H-8, H-9', H-8')  $^{13}\text{C}$  NMR (DMSO- $d_6$ , 150 MHz)  $\delta$  174.6 (C, C-13), 174.6 (C, C-13'), 148.9 (CH, C-1), 142.0 (CH, C-1'), 137.8 (CH, C-6'), 134.7 (CH, C-6), 130.9 (CH, C-5), 130.2 (CH, C-4), 130.0 (CH, C-5'), 128.5 (CH, C-4'), 127.0 (CH, C-3), 126.2 (CH, C-3'), 123.3 (CH, C-2), 121.1 (CH, C-2'), 34.0 (CH<sub>2</sub>, C-12), 34.0 (CH<sub>2</sub>, C-12'), 31.2 (CH<sub>2</sub>, C-7'), 30.6 (CH<sub>2</sub>, C-7), 30.5 (CH<sub>2</sub>, C-8'), 30.2 (CH<sub>2</sub>, C-8), 28.7 (CH<sub>2</sub>, C-10), 28.6 (CH<sub>2</sub>, C-10'), 28.4 (CH<sub>2</sub>, C-9), 28.4 (CH<sub>2</sub>, C-9'), 24.6 (CH<sub>2</sub>, C-11), 24.6 (CH<sub>2</sub>, C-11'),  $^{15}\text{N}$  NMR (DMSO- $d_6$ , 60 MHz)  $\delta$  333.2, 346.8, HRESIMS  $m/z$  455.2560 (calcd. for C<sub>26</sub>H<sub>35</sub>N<sub>2</sub>O<sub>5</sub>, 455.2540). SMILES: OC(CCCCCC1=CC=CC=C1/[N+](O-))=N/C2=CC=CC=C2CCCCCCC(O)=O

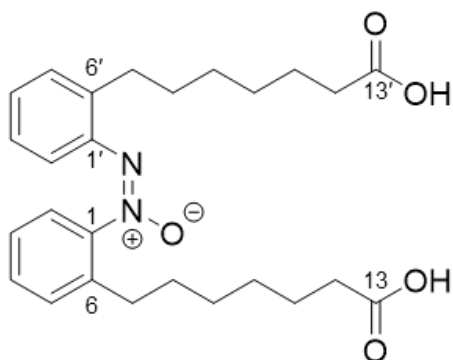

Parkamycin B (**4**):  $^1\text{H}$  NMR (DMSO- $d_6$ , 600 MHz)  $\delta$  7.31 (2H, m, H-4 and H-5), 7.23 (1H, d,  $J = 7.6$  Hz, H-5'), 7.13 (2H, m, H-2 and H-3), 7.05 (1H, t,  $J = 7.5$  Hz, H-4'), 6.90 (1H, t,  $J = 6.9$  Hz, H-3'), 6.50 (1H, d,  $J = 8.0$  Hz, H-2'), 2.67 (2H, m, H-7'), 2.46 (2H, m, H-7), 2.20 (2H, m, H-12), 2.12 (2H, m, H-12'), 1.61 (4H, m, H-8 and H-8'), 1.49 (4H, m, H-11 and H-11'), 1.29 (8H, m, H-9, H-10, H-9', and H-10')  $^{13}\text{C}$  NMR (DMSO- $d_6$ , 150 MHz)  $\delta$  174.5 (C, C-13), 174.5 (C, C-13'), 147.2 (CH, C-1), 143.3 (CH, C-1'), 135.6 (CH, C-6'), 134.3 (CH, C-6), 130.1 (CH, C-5), 129.9 (CH, C-4), 129.6 (CH, C-5'), 127.3 (CH, C-4'), 126.6 (CH, C-3), 126.1 (CH, C-3'), 122.7 (CH, C-2), 121.4 (CH, C-2'), 33.7 (CH<sub>2</sub>, C-12), 33.6 (CH<sub>2</sub>, C-12'), 30.9 (CH<sub>2</sub>, C-7'), 30.6 (CH<sub>2</sub>, C-7), 29.5 (CH<sub>2</sub>, C-8'), 29.4 (CH<sub>2</sub>, C-8), 28.8 (CH<sub>2</sub>, C-10'), 28.6 (CH<sub>2</sub>, C-10), 28.5 (CH<sub>2</sub>, C-9), 28.3 (CH<sub>2</sub>, C-9'), 24.5 (CH<sub>2</sub>, C-11), 24.4 (CH<sub>2</sub>, C-11) HRESIMS  $m/z$  455.2560 (calcd. for C<sub>26</sub>H<sub>35</sub>N<sub>2</sub>O<sub>5</sub>, 455.2540). SMILES: OC(CCCCCC1=CC=CC=C1/[N+](O-))=N\C2=CC=CC=C2CCCCCCC(O)=O

*Cis/trans isomer interconversion:* To determine equilibrium ratios between the two forms of this compound (parkamycins A and B), purified samples of each compound were prepared as solutions in both clear and amber vials (0.5 mL of 0.1 mg/mL solution in MeOH). All four vials were exposed to ambient light at 10-minute intervals and aliquots from each timepoint analyzed by HR-UPLC-MS.

Under exposure to light (clear vial, top plot), both samples reached an equilibrium ratio of ~85:15 in under 20 minutes. By contrast, exposure to ambient light in amber vials (bottom plot) did not lead to appreciable levels of interconversion. These results demonstrate that parkamycin A is stable under long-term storage conditions, provided

that light is excluded. Further, the relative ratios of the two products at equilibrium supports the assignment of the azoxy configuration as trans for parkamycin A (the more stable isomer) due to steric arguments.

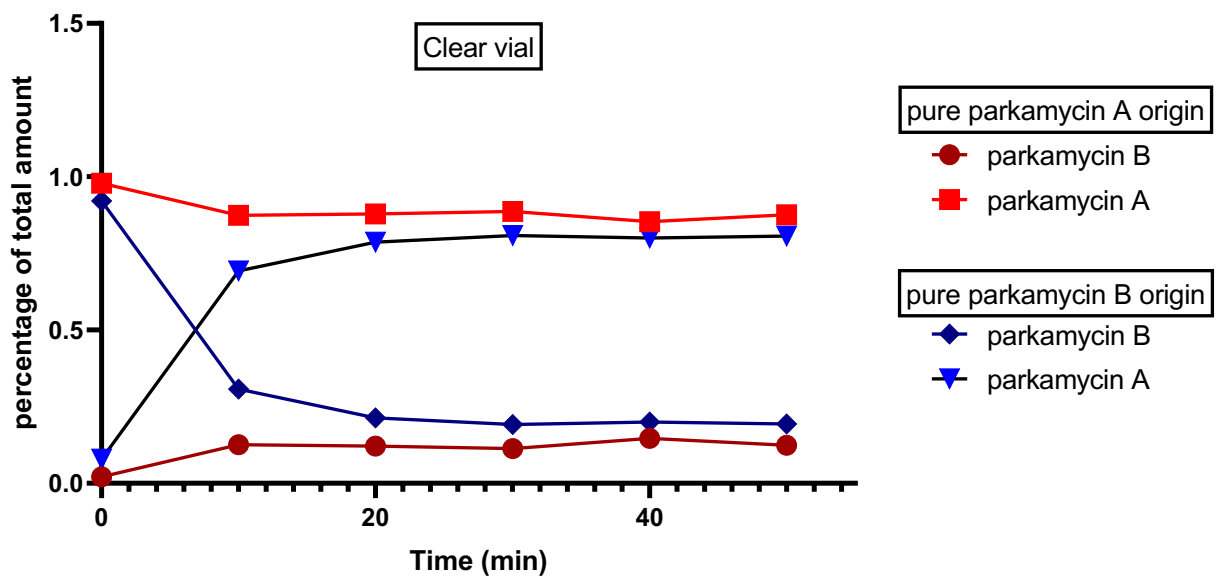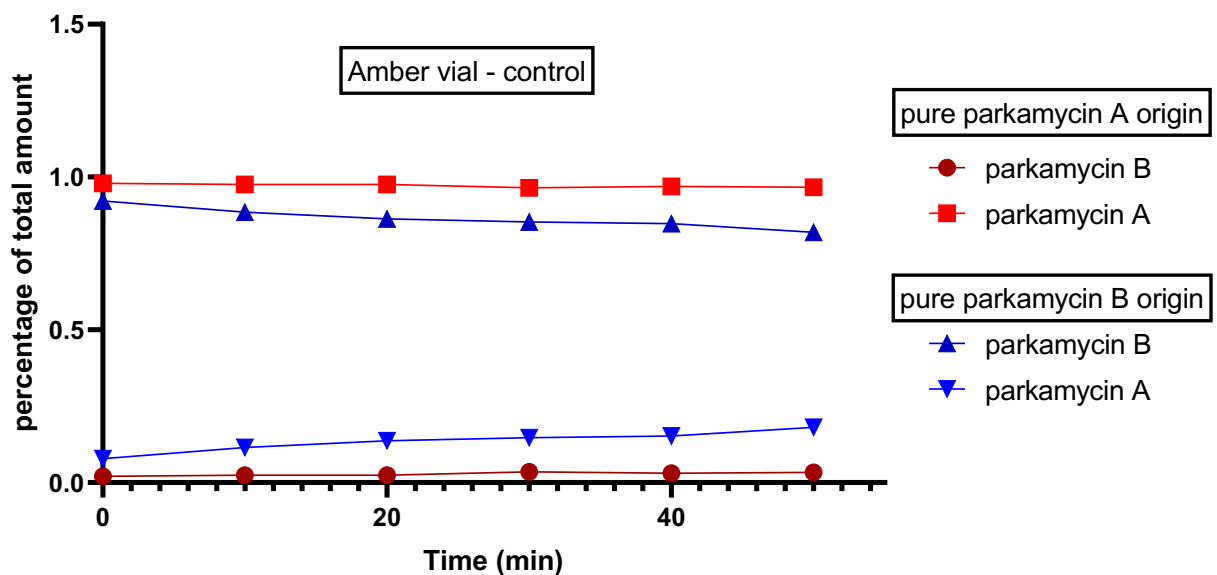

NMR table for parkamycin A and B, acquired at 600 MHz in DMSO-*d*<sub>6</sub>.

| Position | Parkamycin A |            |               | Parkamycin B |            |               |
|----------|--------------|------------|---------------|--------------|------------|---------------|
|          | $\delta_C$   | $\delta_H$ | <i>J</i> (Hz) | $\delta_C$   | $\delta_H$ | <i>J</i> (Hz) |
| 1        | 148.9        |            |               | 147.2        |            |               |
| 2        | 123.3        | 7.62       | 8.4           | 122.7        | 7.13       |               |
| 3        | 127.0        | 7.42       | 7.6           | 126.6        | 7.13       |               |
| 4        | 130.2        | 7.51       | 7.5           | 129.9        | 7.31       |               |
| 5        | 130.9        | 7.46       | 7.5           | 130.1        | 7.31       |               |
| 6        | 134.7        |            |               | 134.3        |            |               |
| 7        | 30.6         | 2.73       | 7.7           | 30.6         | 2.46       |               |
| 8        | 30.2         | 1.58       | 7.2           | 29.4         | 1.61       |               |
| 9        | 28.4         | 1.24       |               | 28.3         | 1.29       |               |
| 10       | 28.7         | 1.24       |               | 28.6         | 1.29       |               |
| 11       | 24.6         | 1.43       |               | 24.5         | 1.49       |               |
| 12       | 34.0         | 2.11       |               | 33.7         | 2.20       |               |
| 13       | 174.6        |            |               | 174.5        |            |               |
| 1'       | 142.0        |            |               | 143.3        |            |               |
| 2'       | 121.1        | 7.84       | 7.1           | 121.4        | 6.50       | 8.0           |
| 3'       | 126.2        | 7.32       |               | 126.1        | 6.90       | 6.9           |
| 4'       | 128.5        | 7.32       |               | 127.3        | 7.05       | 7.5           |
| 5'       | 130.0        | 7.37       | 6.7           | 129.6        | 7.23       | 7.6           |
| 6'       | 137.8        |            |               | 135.6        |            |               |
| 7'       | 31.2         | 2.61       | 7.7           | 30.9         | 2.67       |               |
| 8'       | 30.5         | 1.50       | 7.0           | 29.5         | 1.61       |               |
| 9'       | 28.4         | 1.24       |               | 28.5         | 1.29       |               |
| 10'      | 28.6         | 1.24       |               | 28.8         | 1.29       |               |
| 11'      | 24.6         | 1.43       |               | 24.4         | 1.49       |               |
| 12'      | 34.0         | 2.11       |               | 33.6         | 2.12       |               |
| 13'      | 174.6        |            |               | 174.5        |            |               |

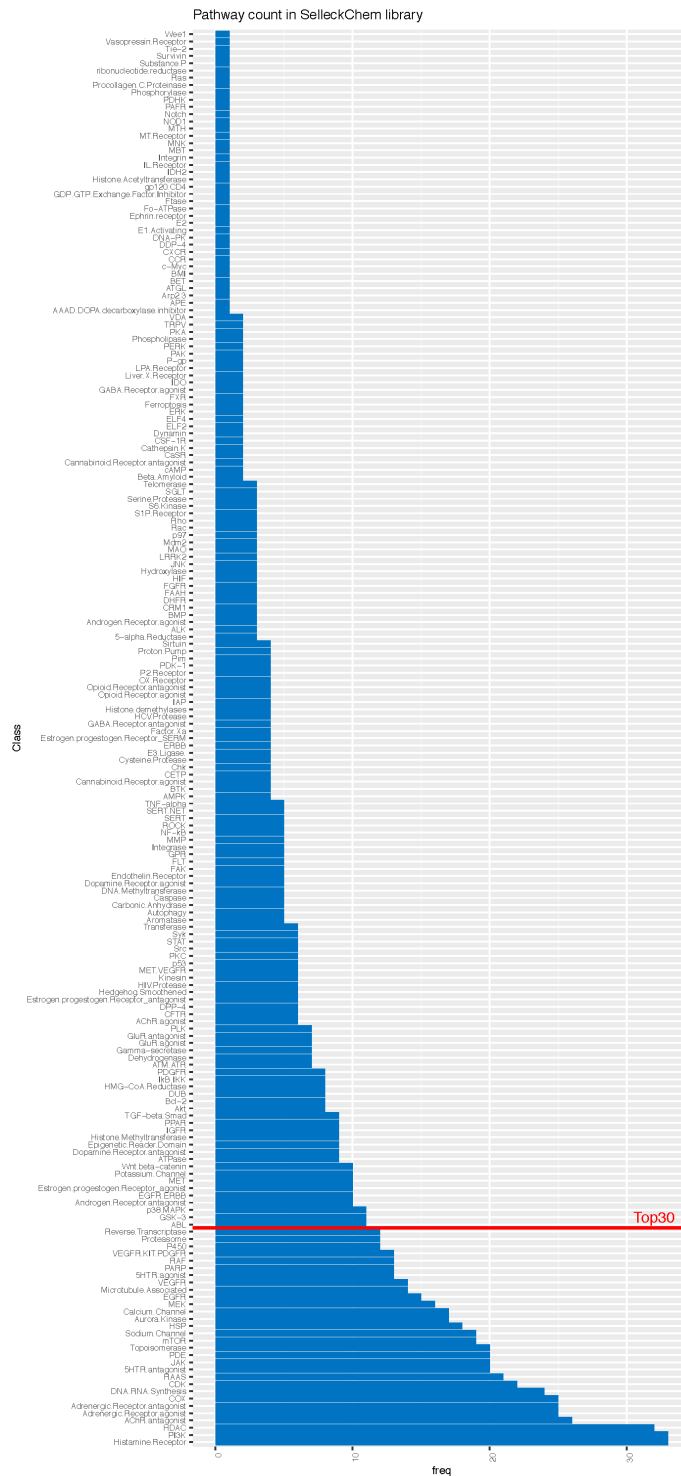

**Supplementary Figure 1: Selleck library target class membership.**

Annotated targets in the Selleck library are listed in order of the number of chemicals that are assigned to that class. The top 30 largest target classes were selected for comparison by k-means clustering in Figure 1.

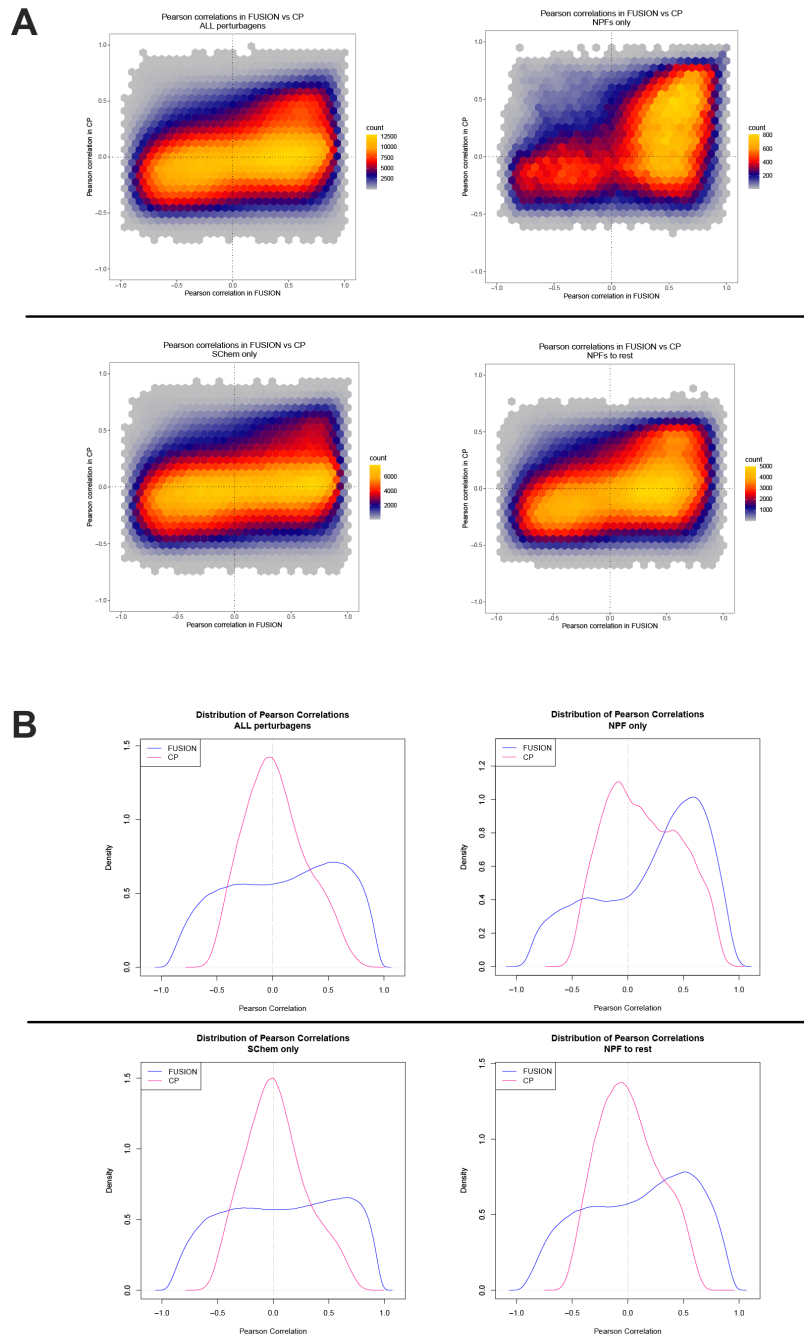

**Supplementary Figure 2: Pearson correlation distributions in FUSION and CP.**

A) Hexplots and B) density plots illustrating the trends in Pearson correlations between indicated perturbation types.

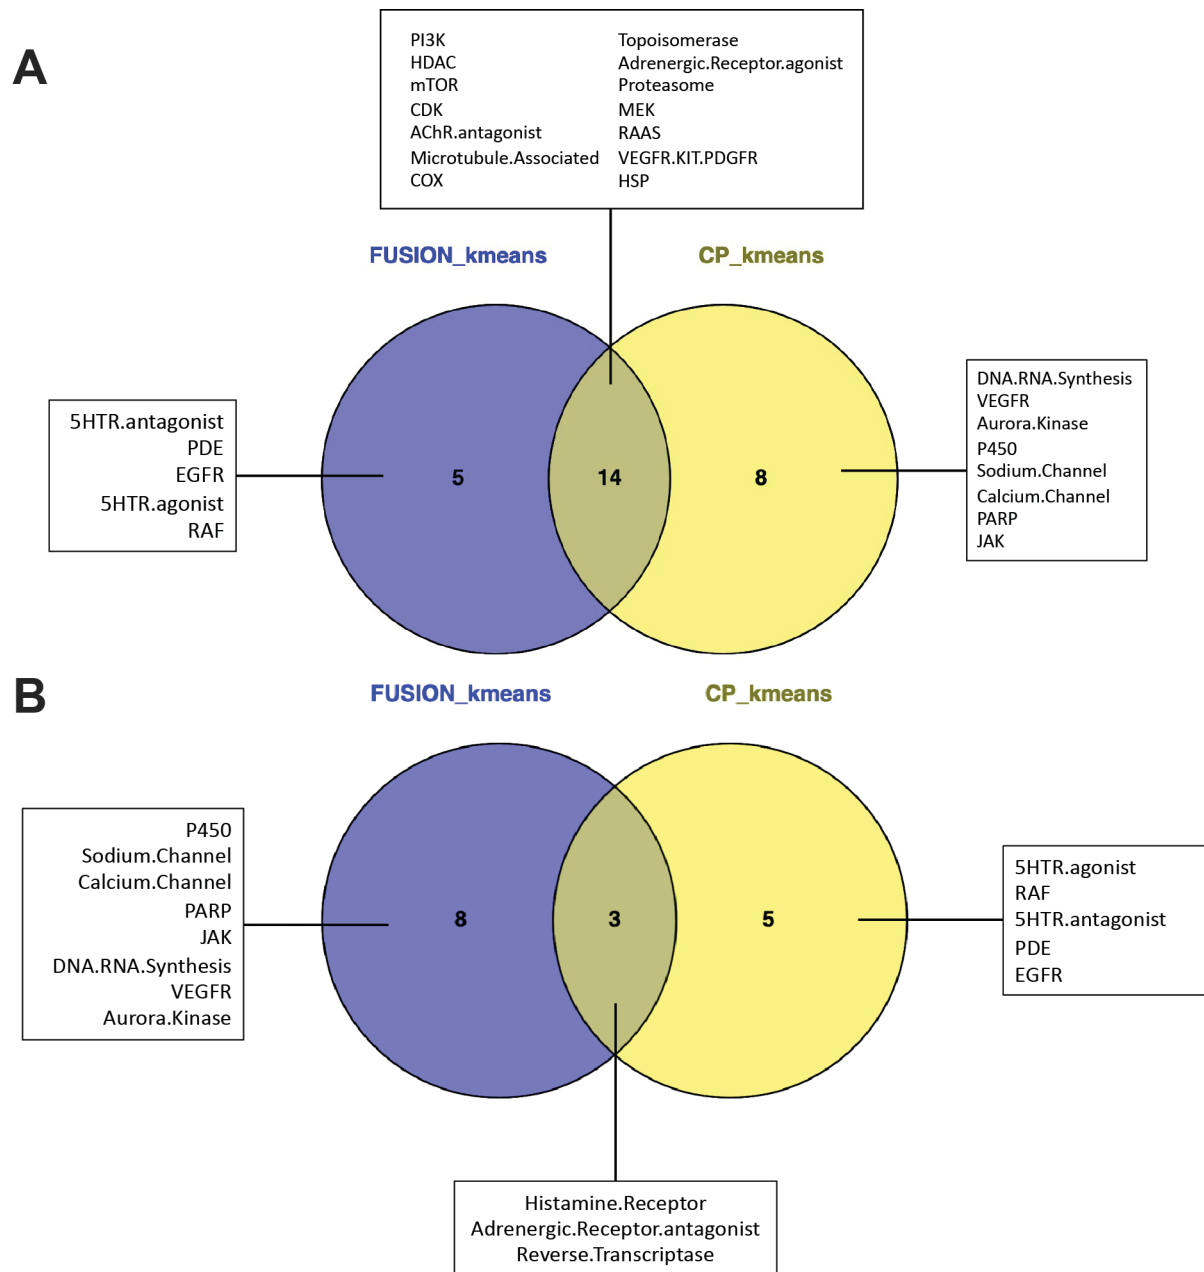

**Supplementary Figure 3: Venn diagrams illustrating overlap among target classes identified as significantly enriched in a k-means cluster.**

A) Overlap among target classes that were identified as significantly enriched in at least one kmeans (k=30) cluster by hypergeometric test with Bonferroni correction. B) Overlap among target classes that were not identified as significantly enriched by the same method.



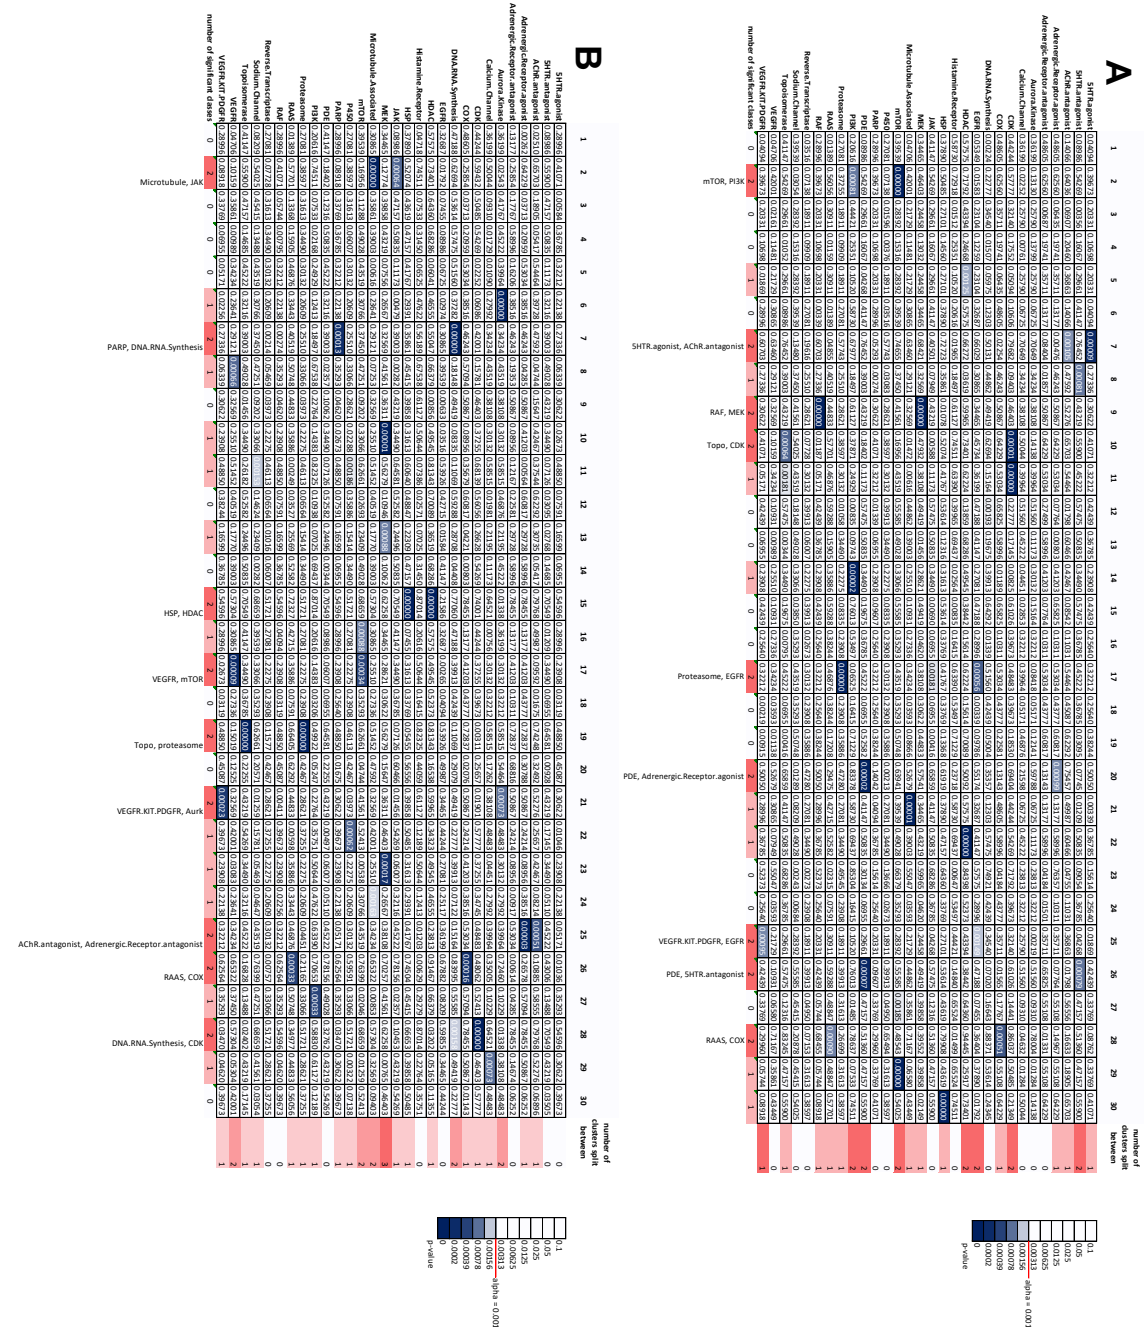

**Supplementary Figure 4: Annotated heatmaps showing which target classes are significantly enriched in k-means clusters.** Enrichment was assessed by hypergeometric test (Bonferroni-corrected alpha = 0.001667) in k-means clusters (k=30) in A) FUSION and B) CP datasets. "Number of significant classes" refers to a count of the number of target classes found to be significantly enriched in that cluster (p<0.00167). "Number of clusters split between" refers to a count of the number of clusters in which a target class was significantly enriched.

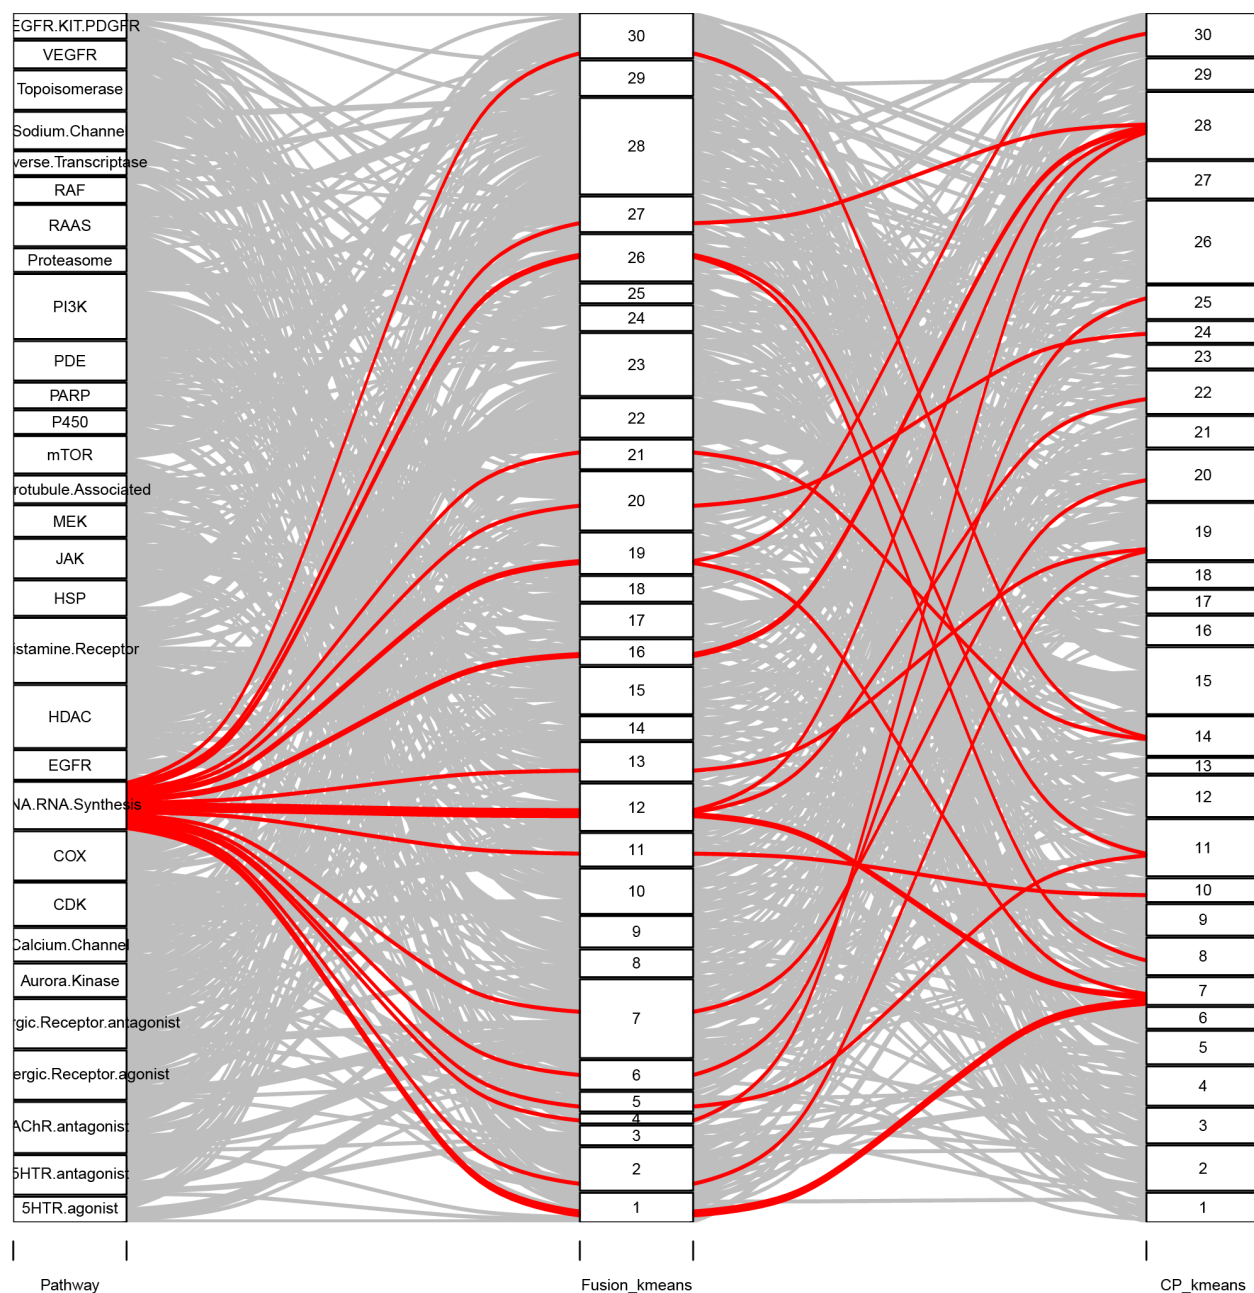

**Supplementary Figure 5. Alluvial diagrams for each target class using k-means clustering of the FUSION and CP datasets.**

Comparison of k-means clustering ( $k=30$ ) of FUSION and CP signatures for the top 30 target classes in the Selleck chemical library. Each line represents a compound, and each panel displays a separate target class with chemicals belonging to that class highlighted in red.

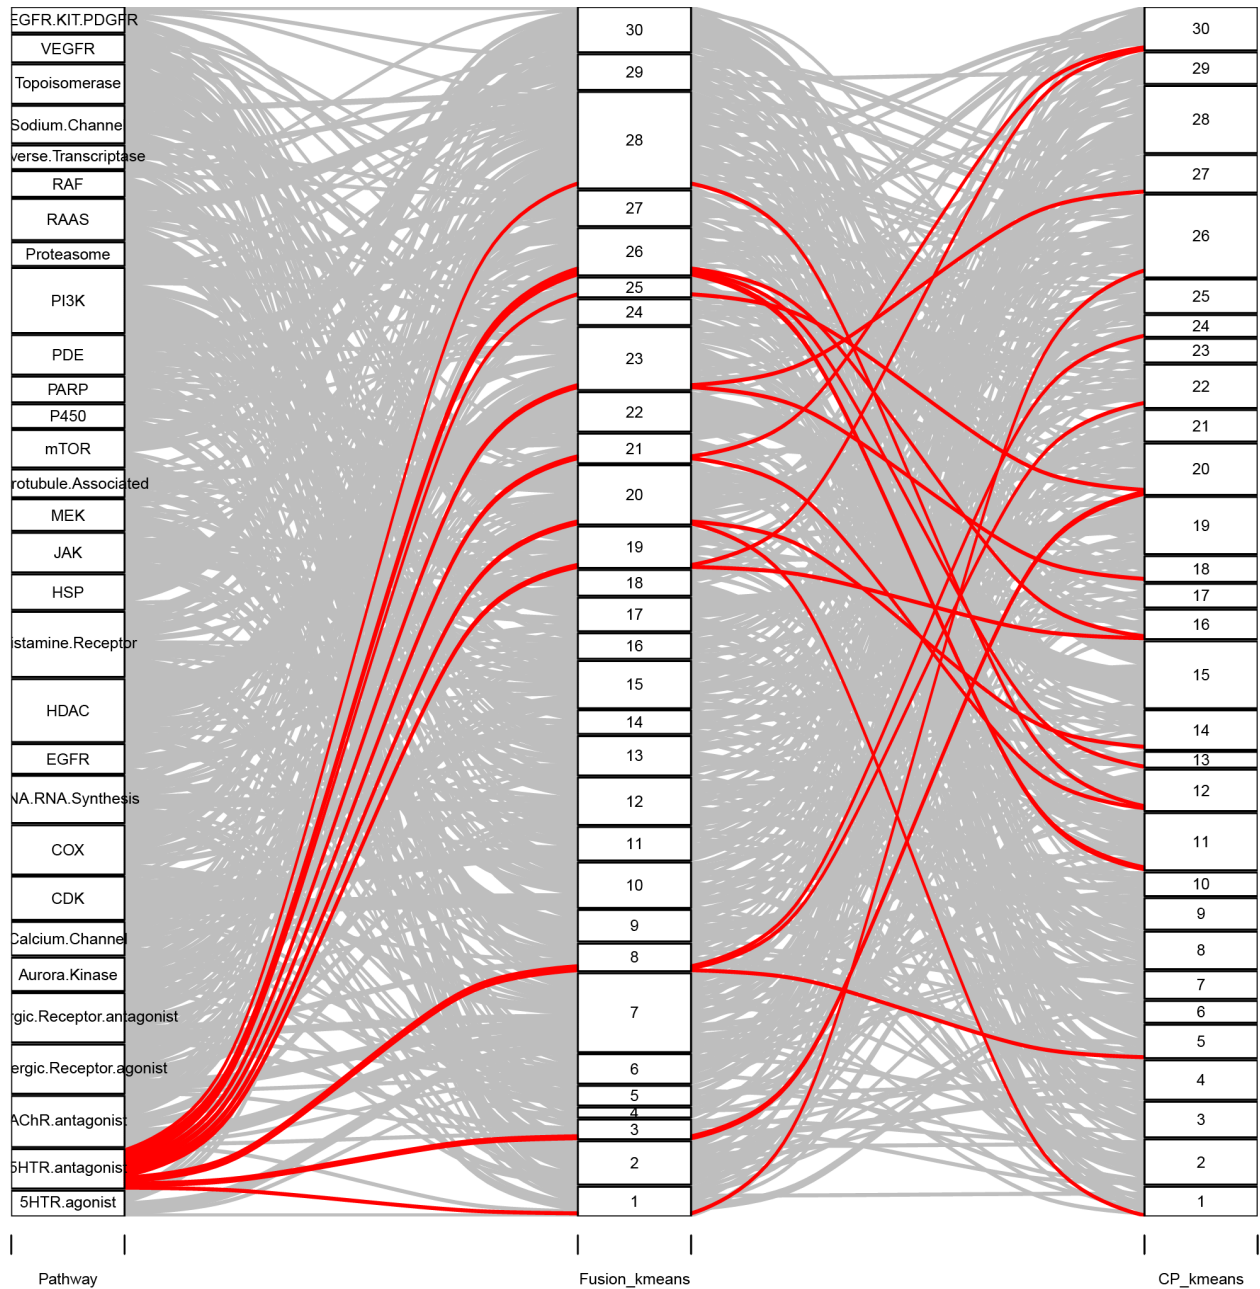

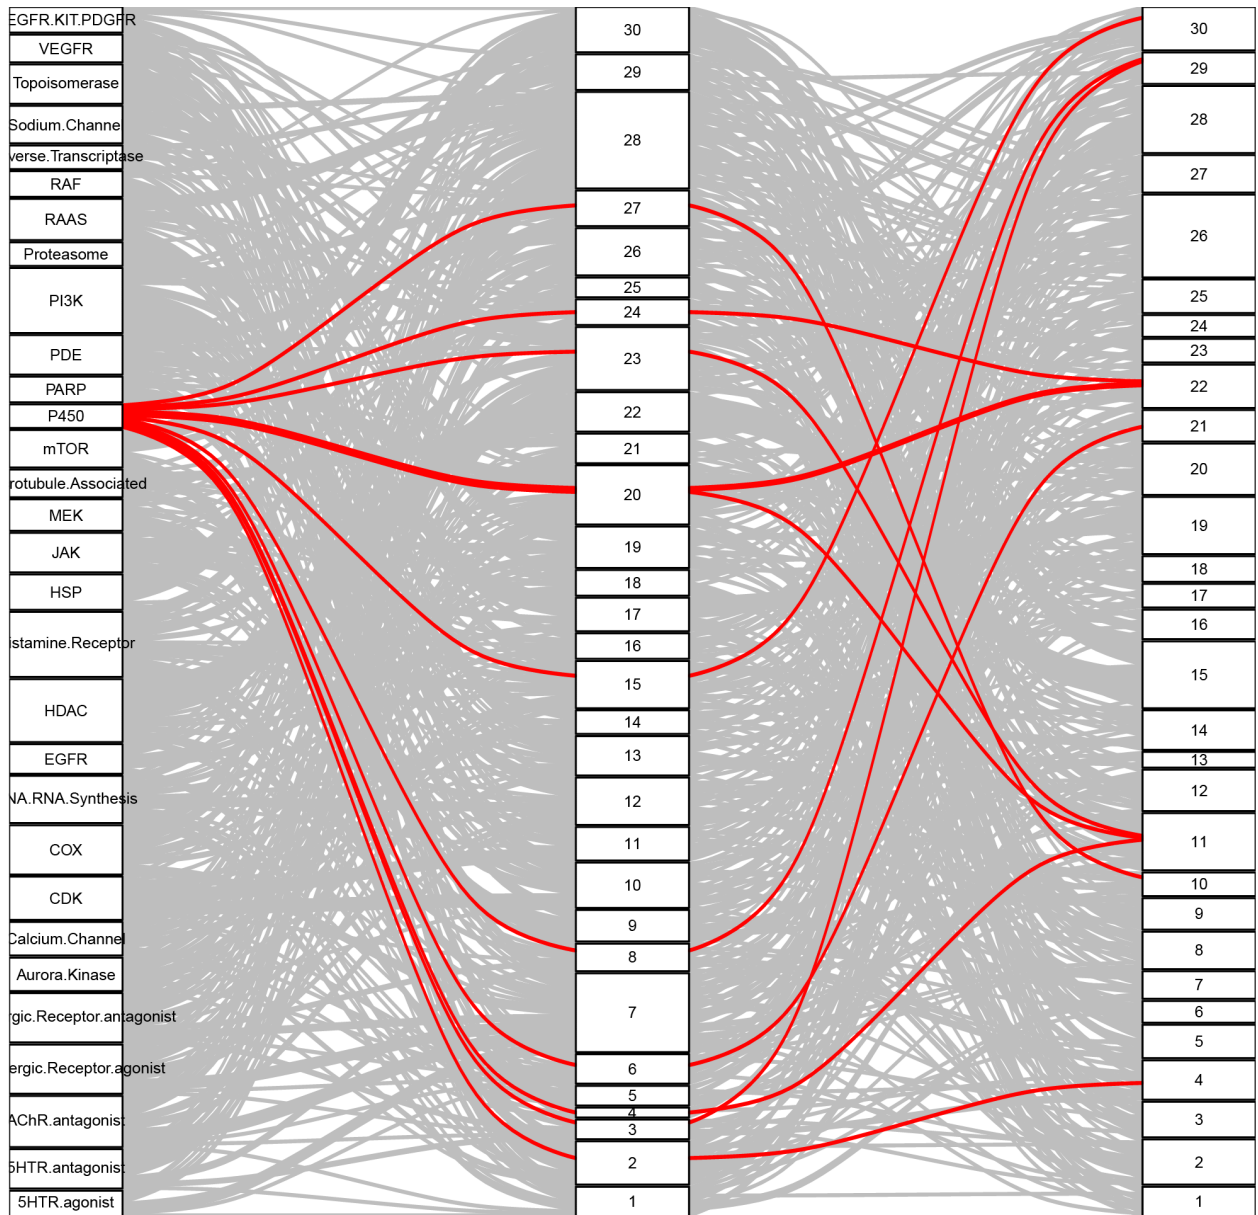

Pathway

Fusion\_kmeans

CP\_kmeans

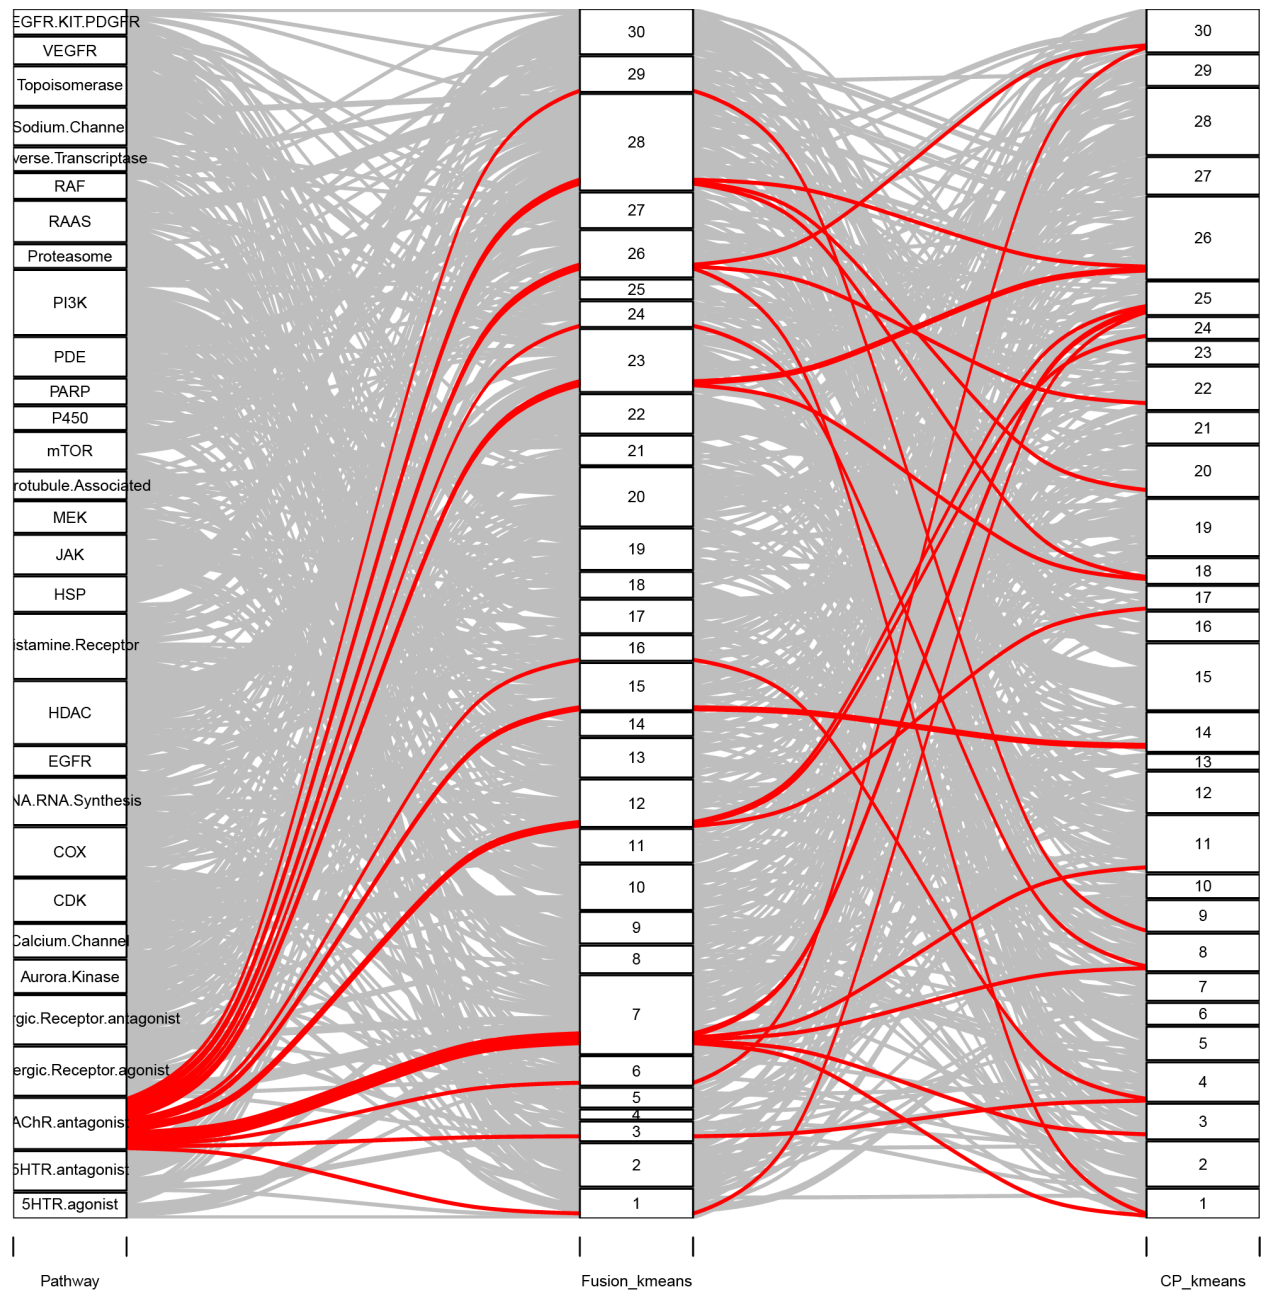

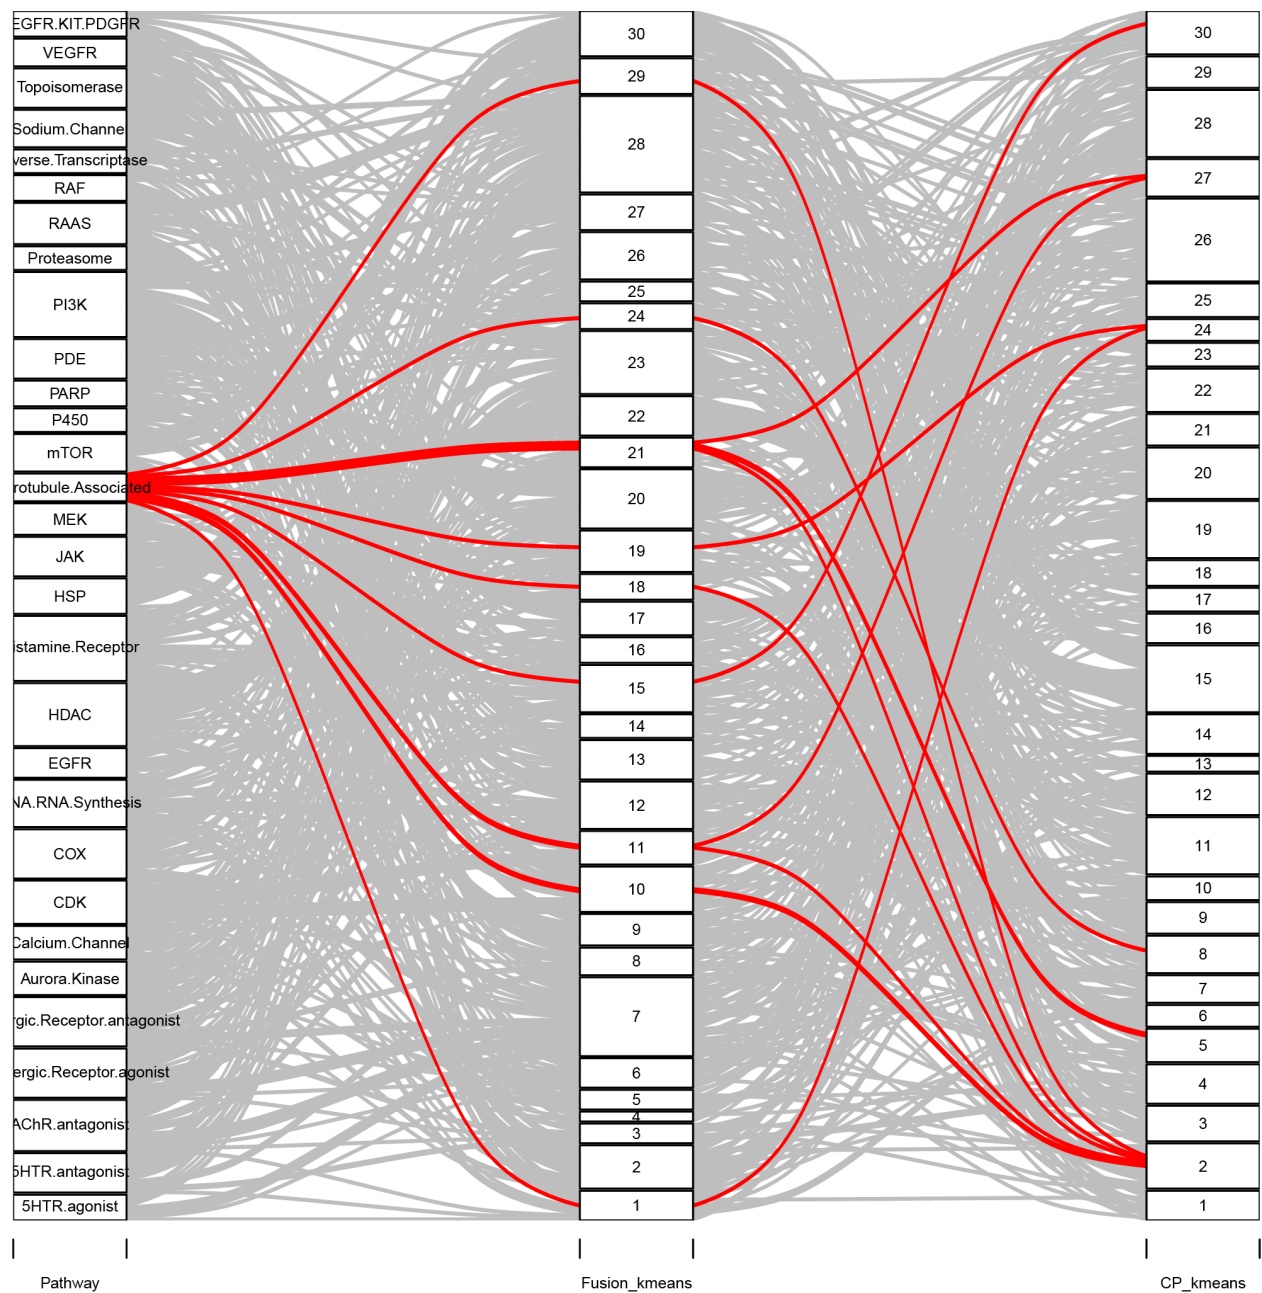

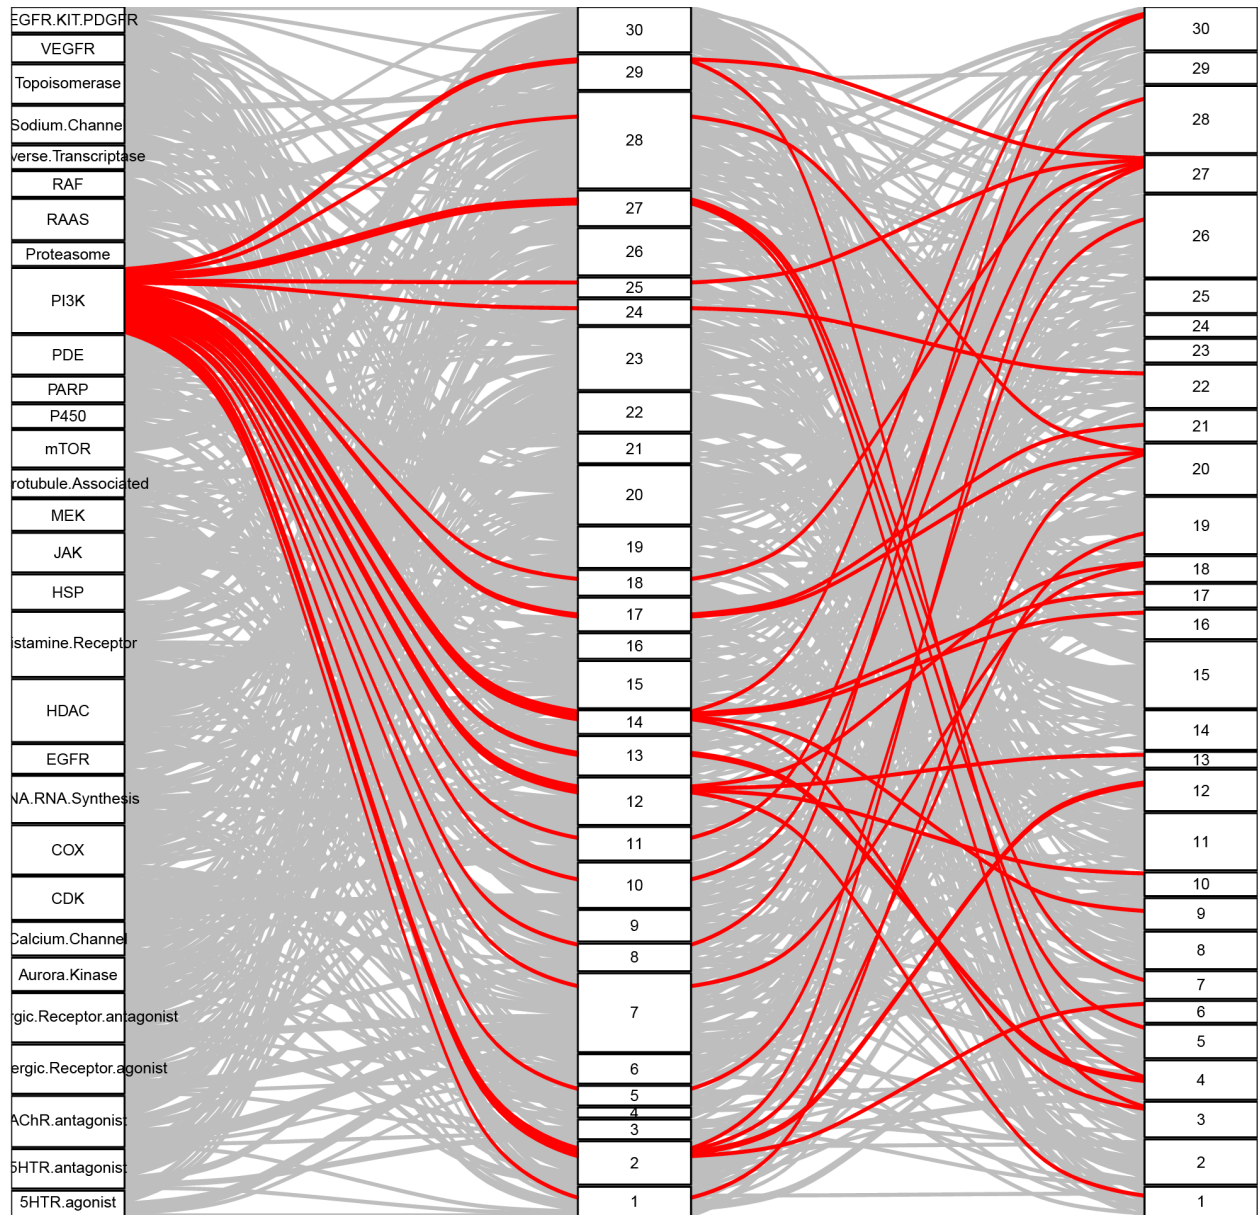

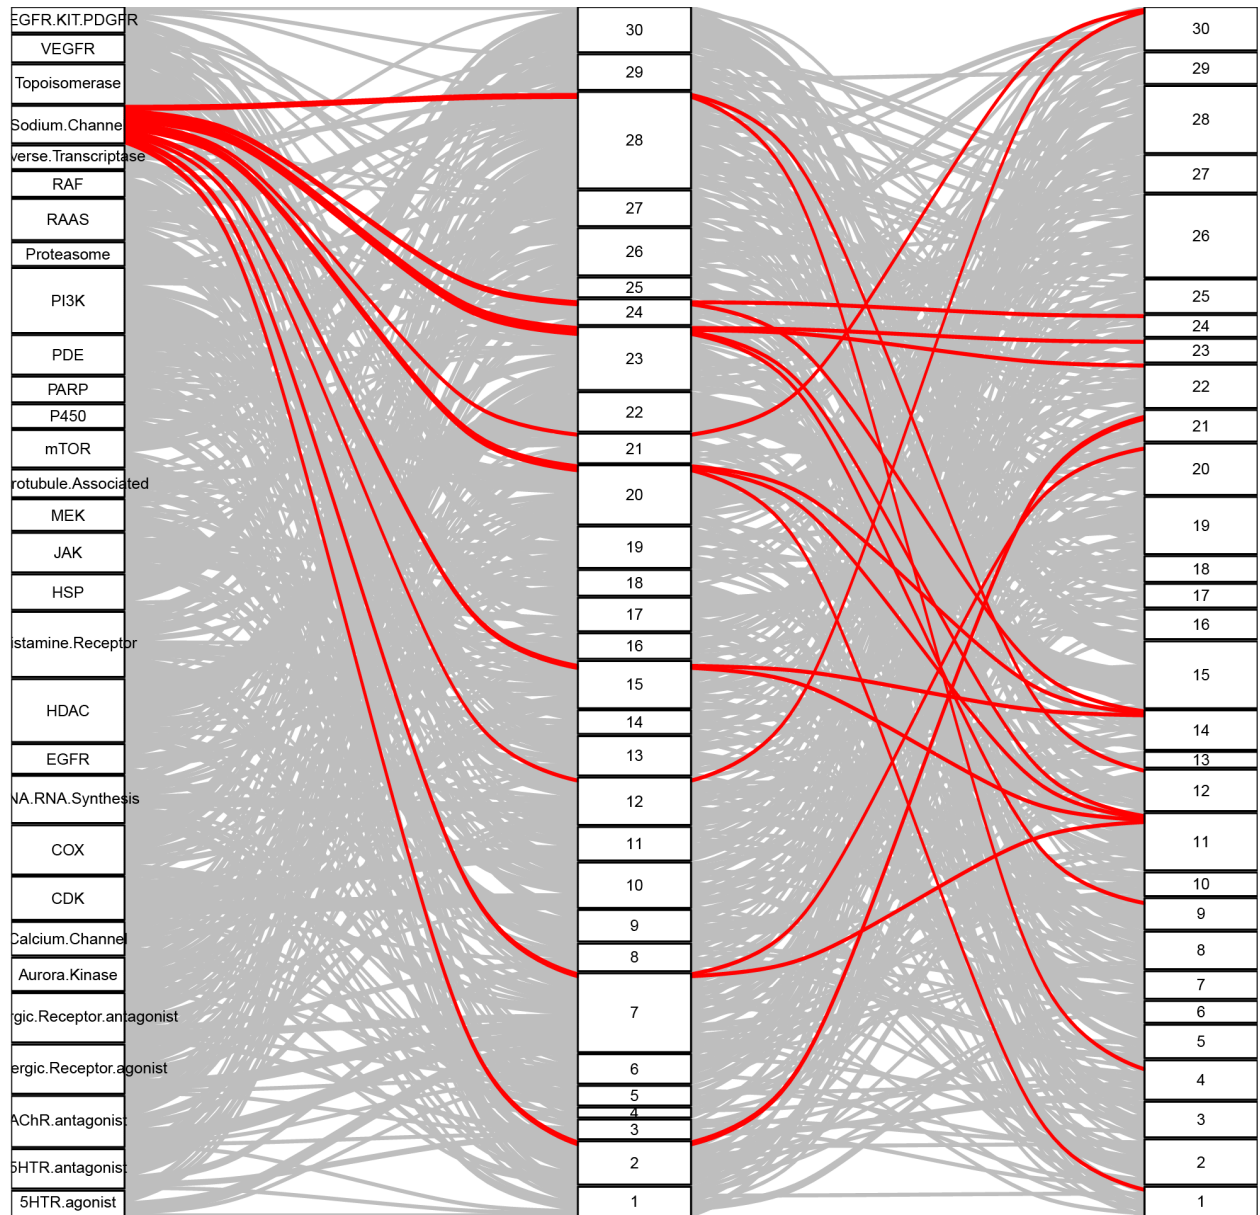

Pathway Fusion\_kmeans CP\_kmeans



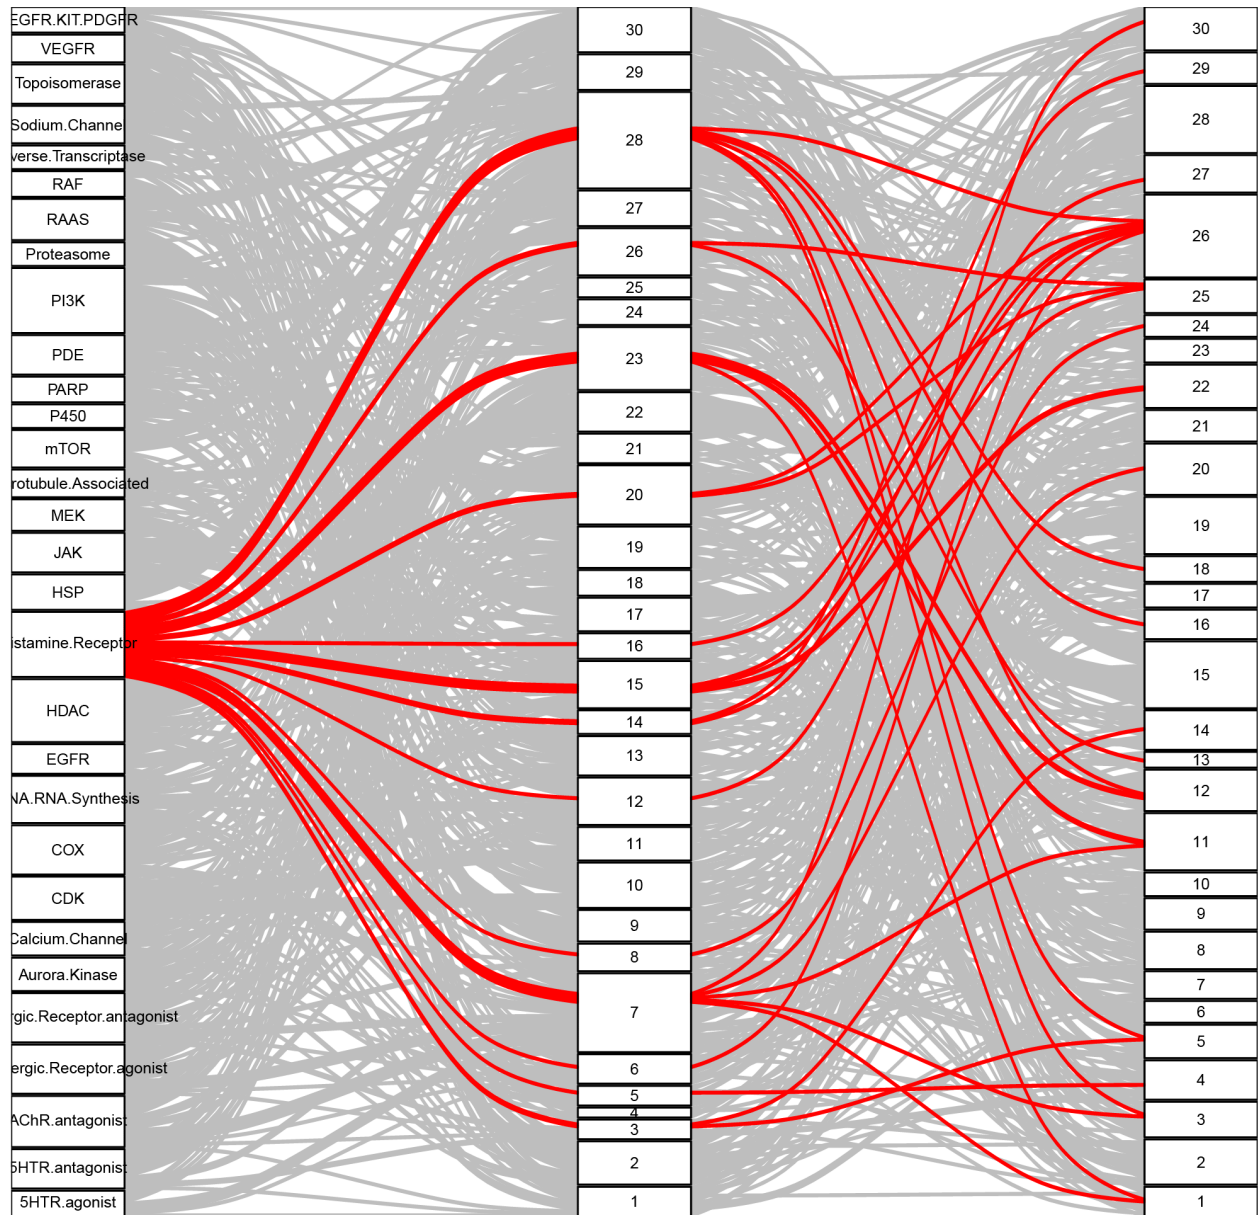

Pathway Fusion\_kmeans CP\_kmeans

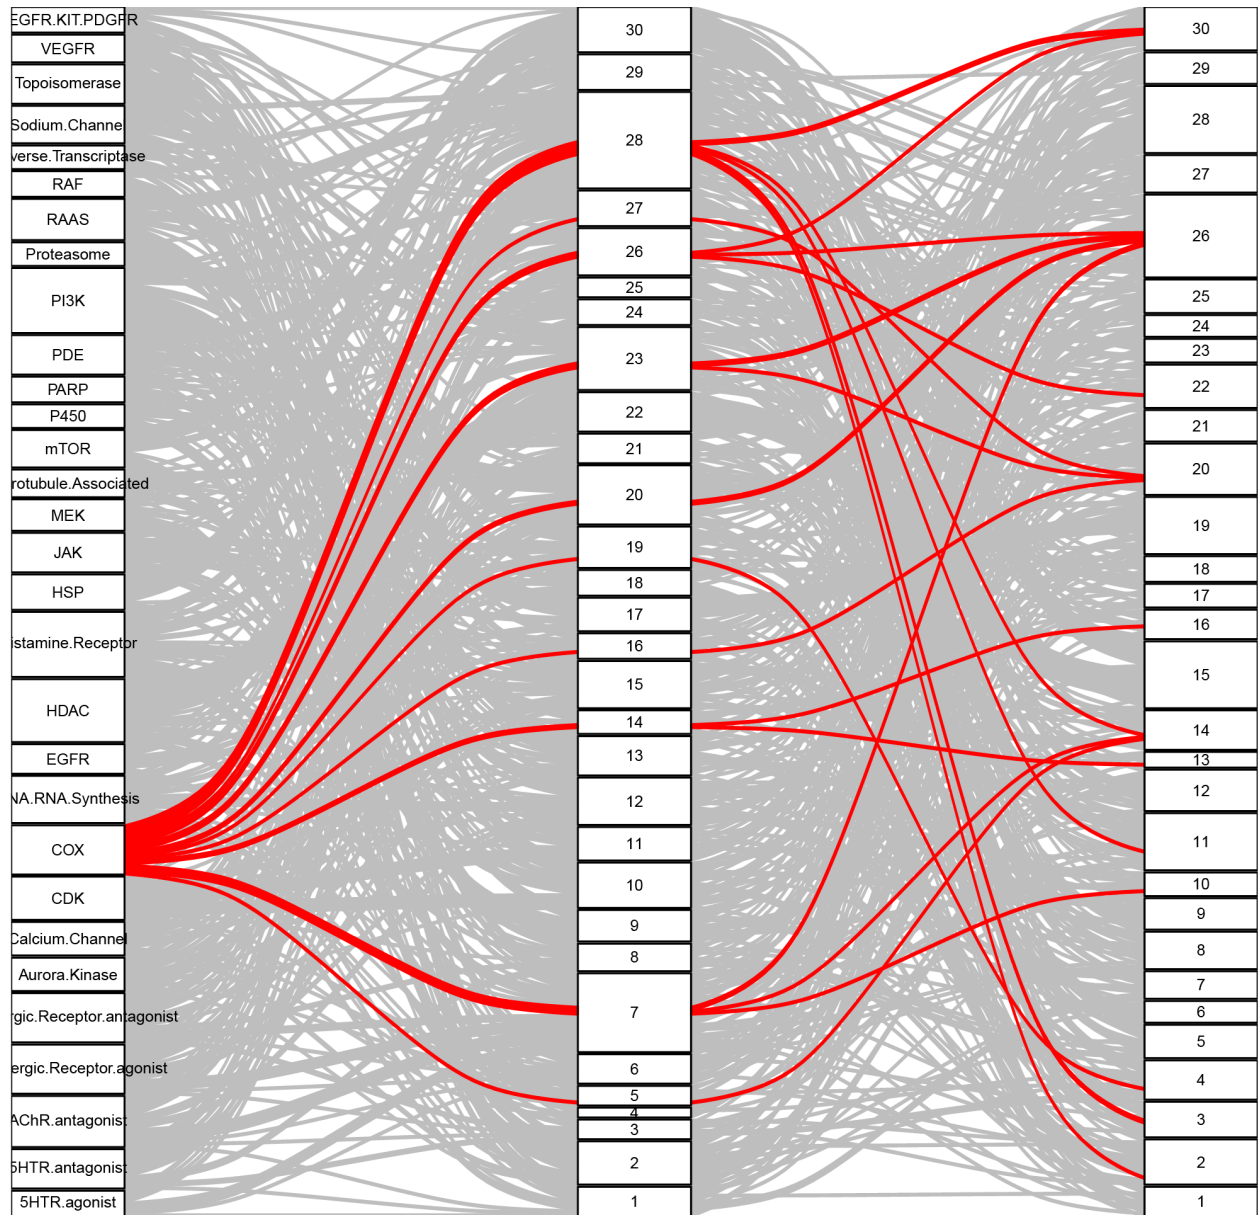

Pathway Fusion\_kmeans CP\_kmeans

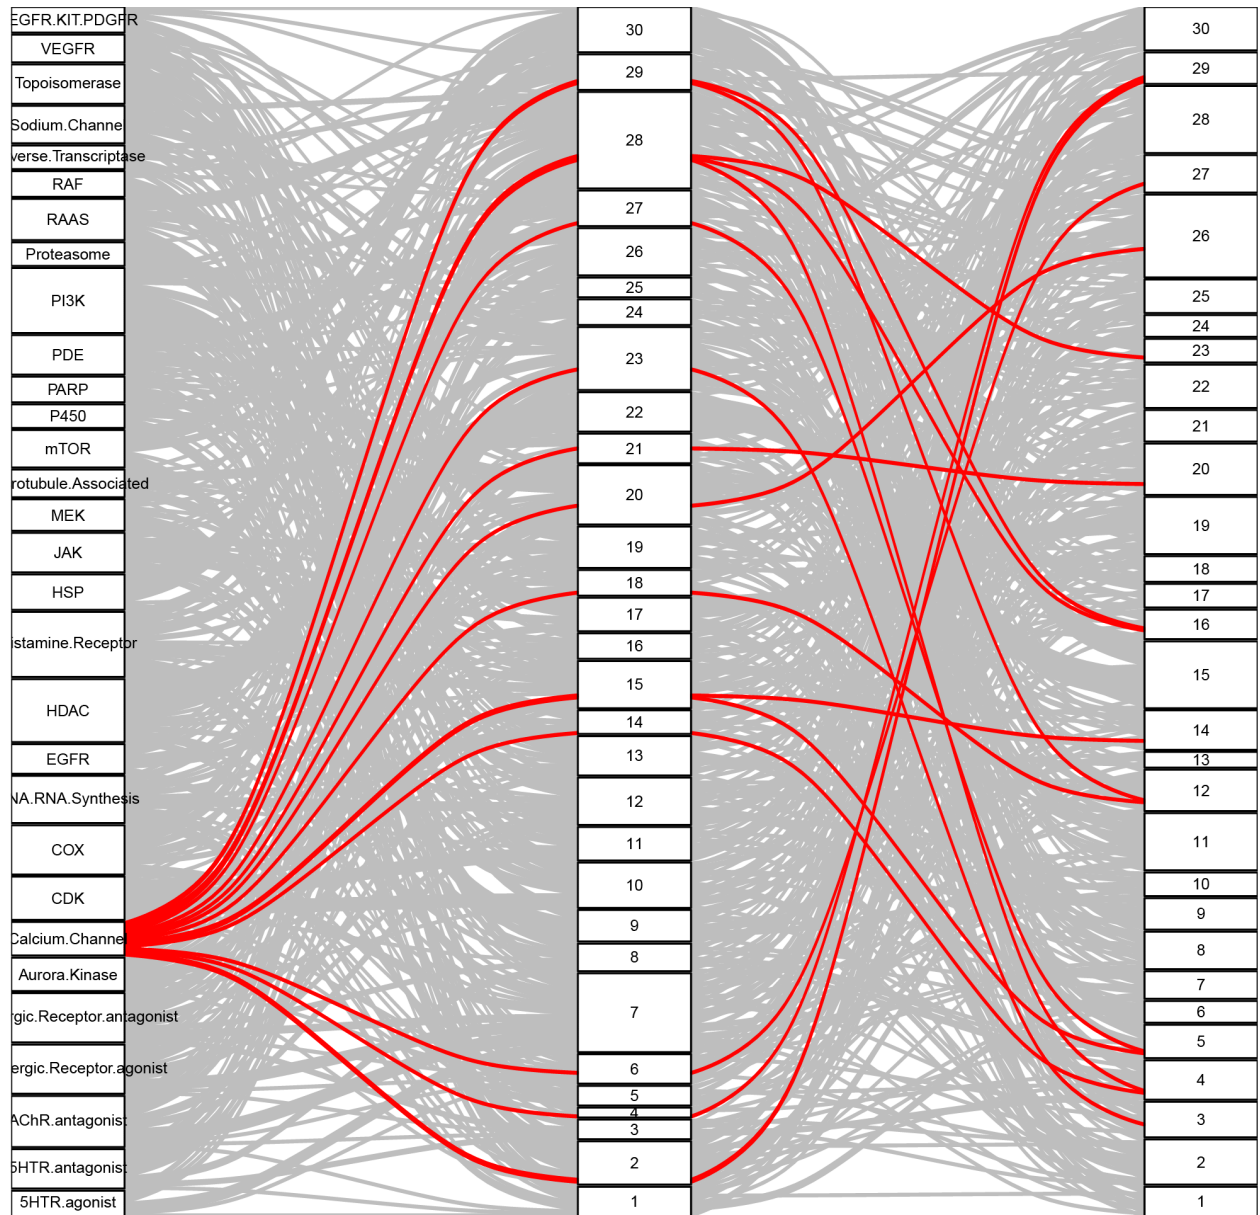

Pathway

Fusion\_kmeans

CP\_kmeans

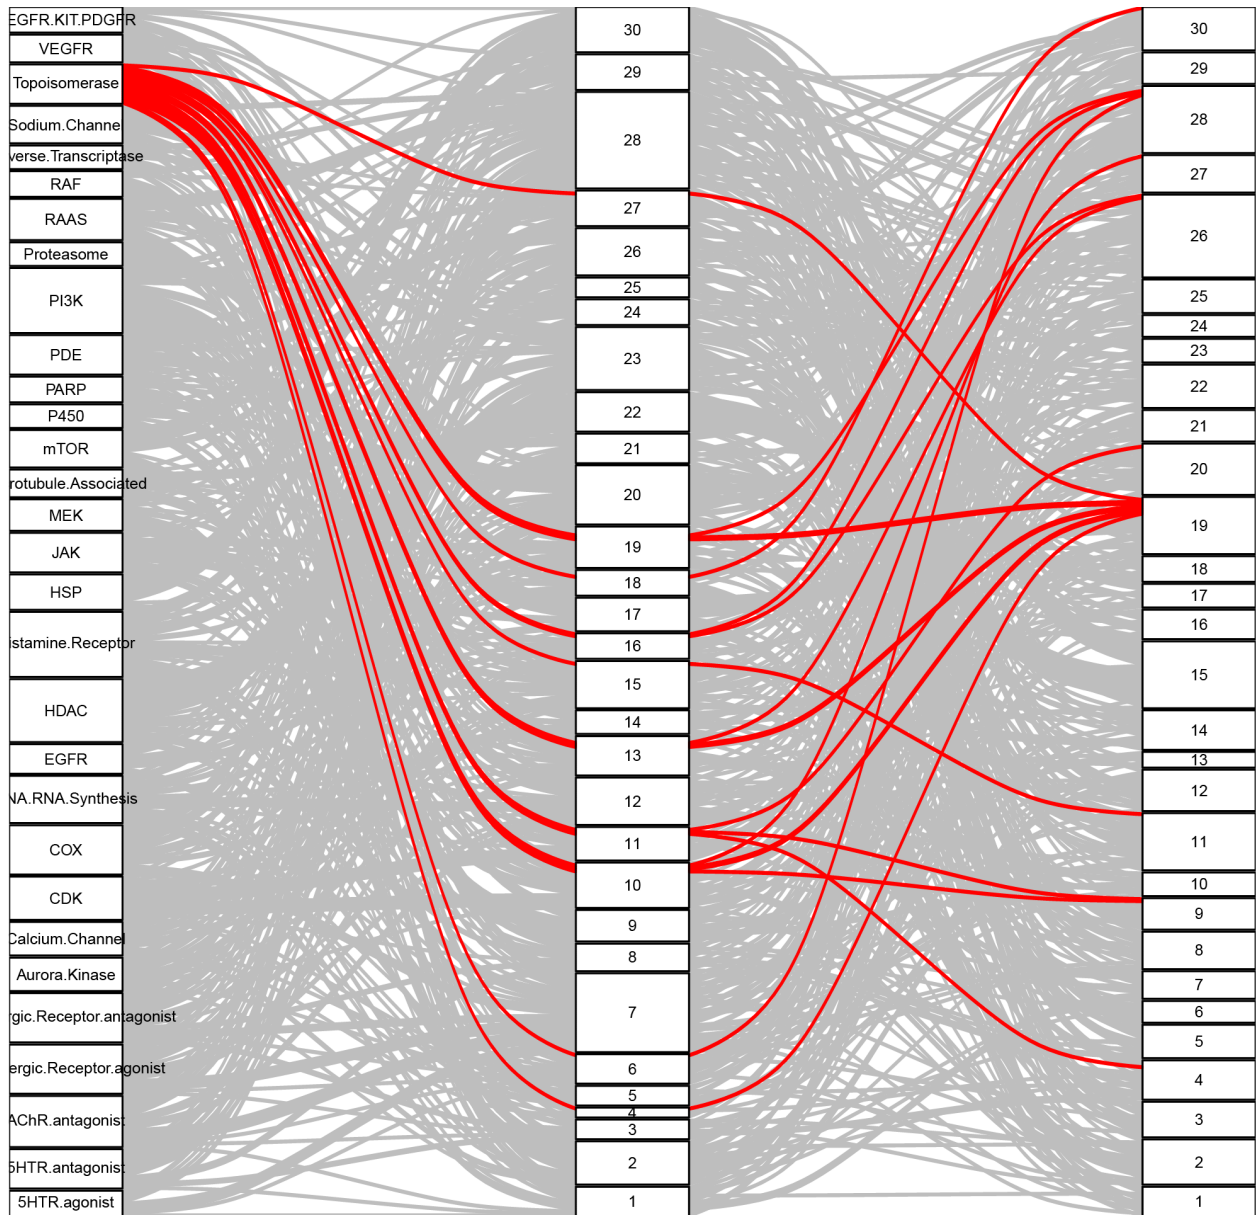

Pathway Fusion\_kmeans CP\_kmeans

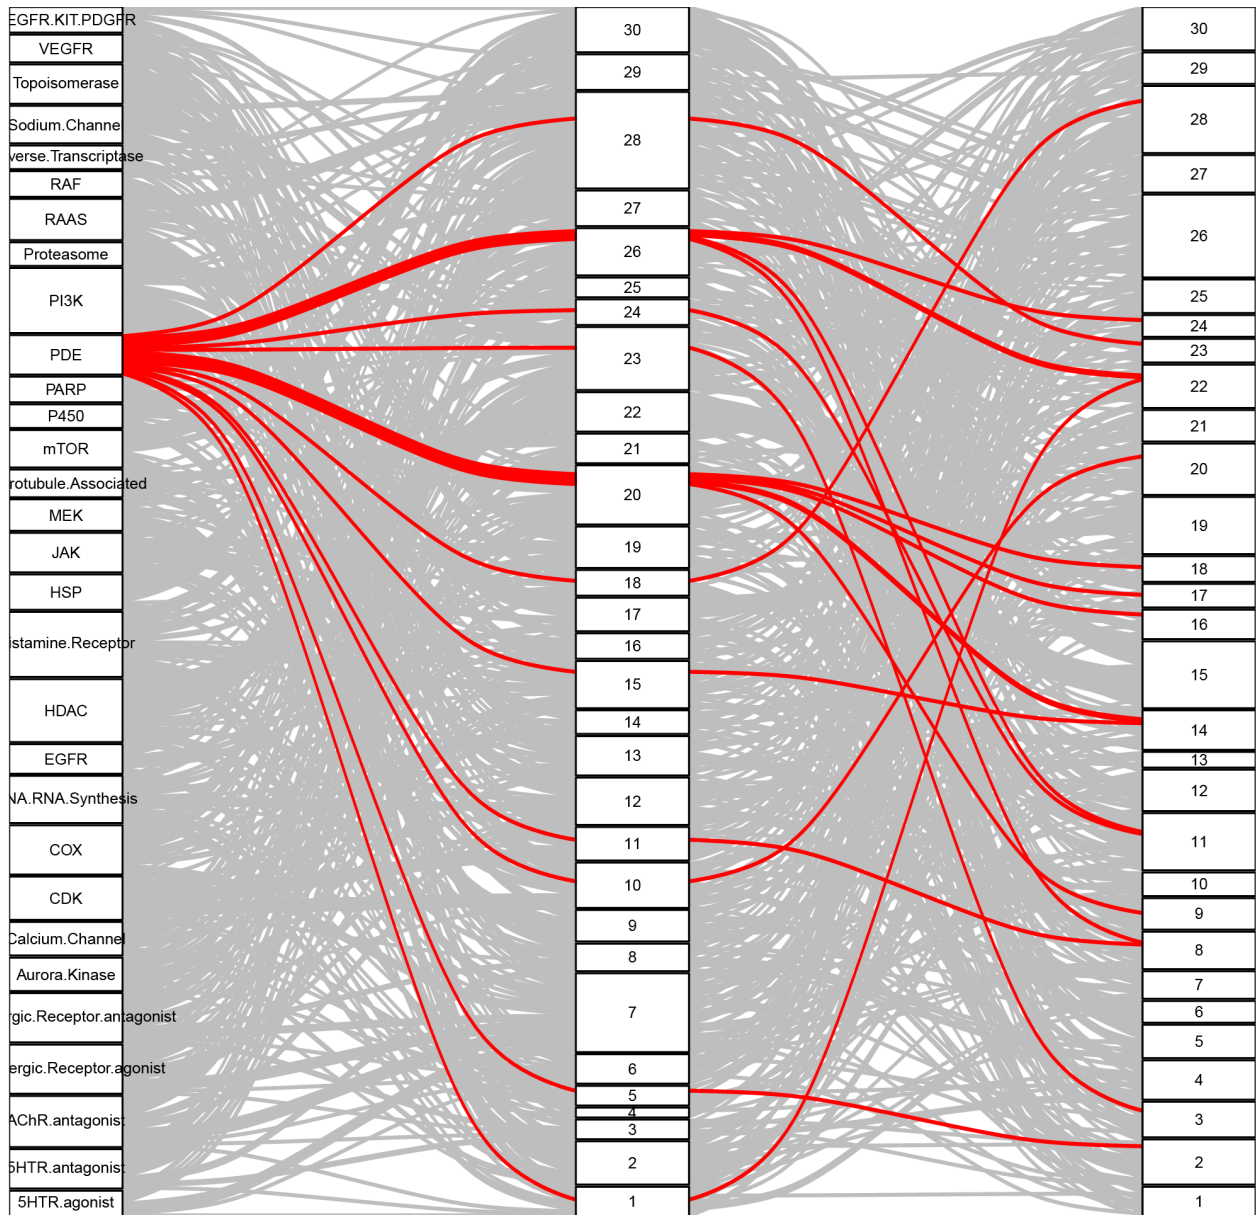

Pathway

Fusion\_kmeans

CP\_kmeans

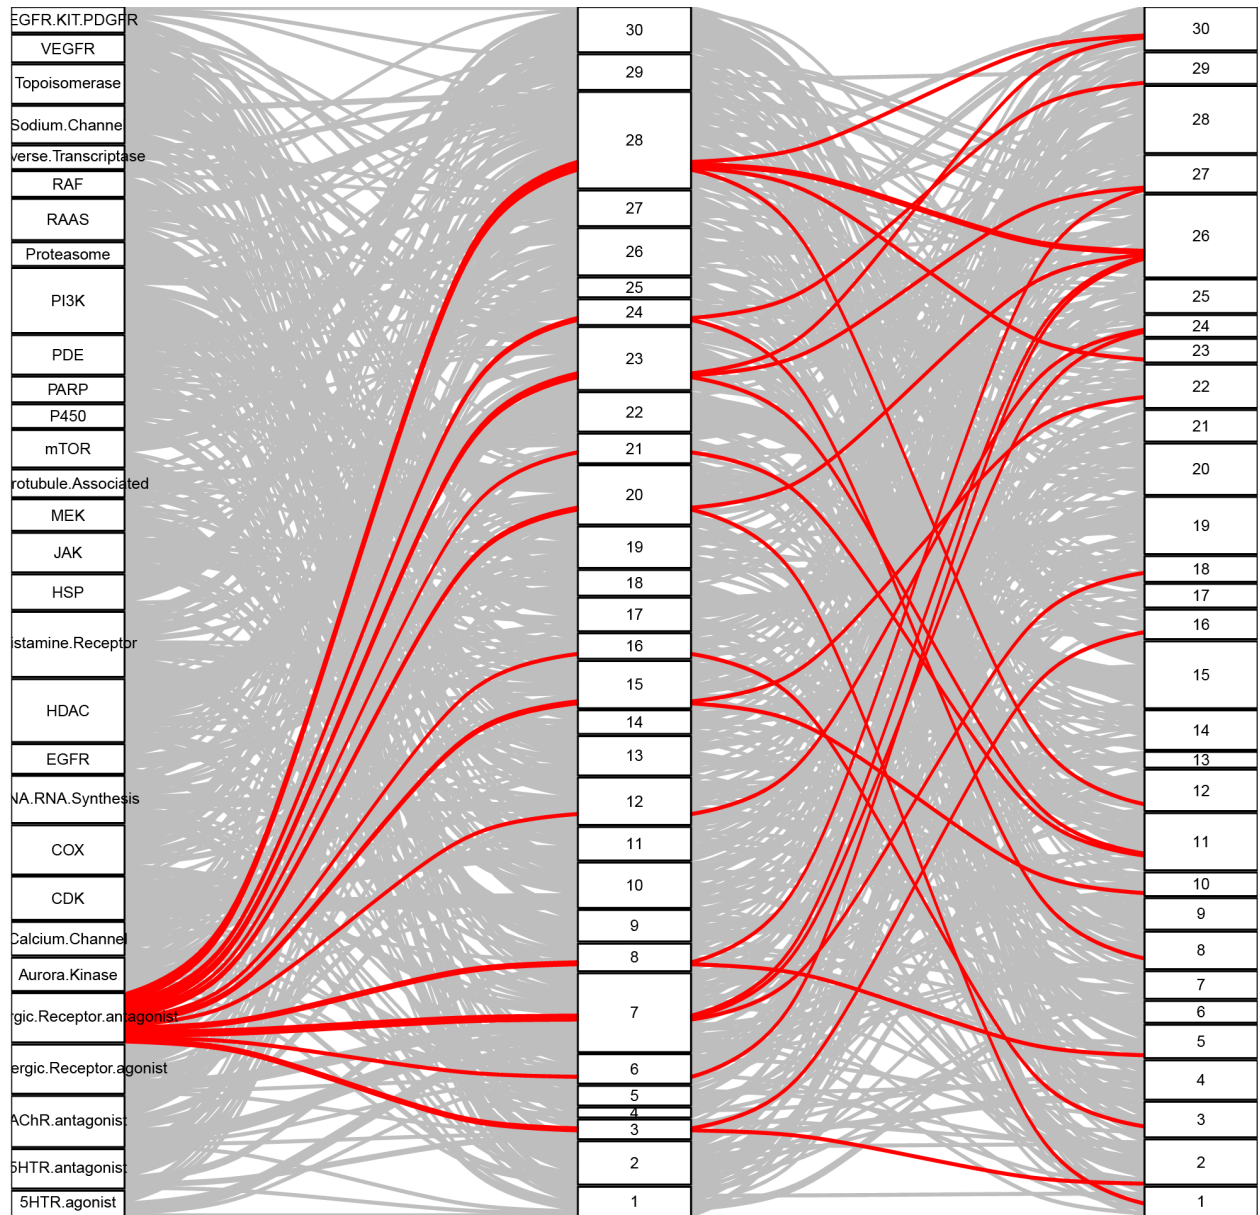

Pathway | Fusion\_kmeans | CP\_kmeans

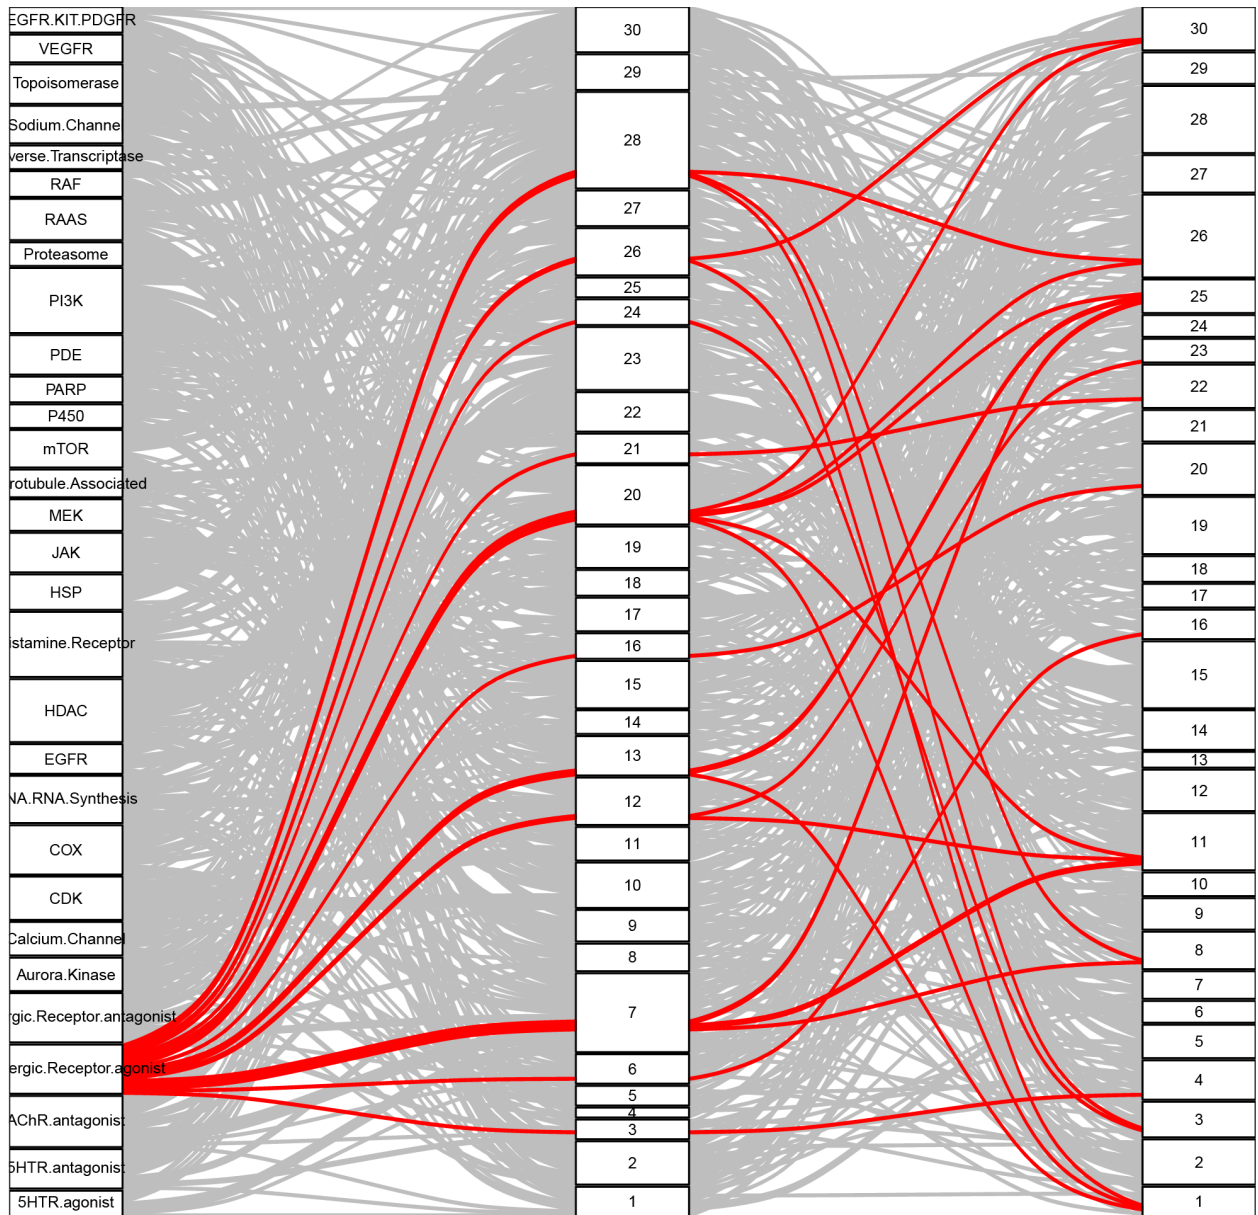

Pathway | Fusion\_kmeans | CP\_kmeans

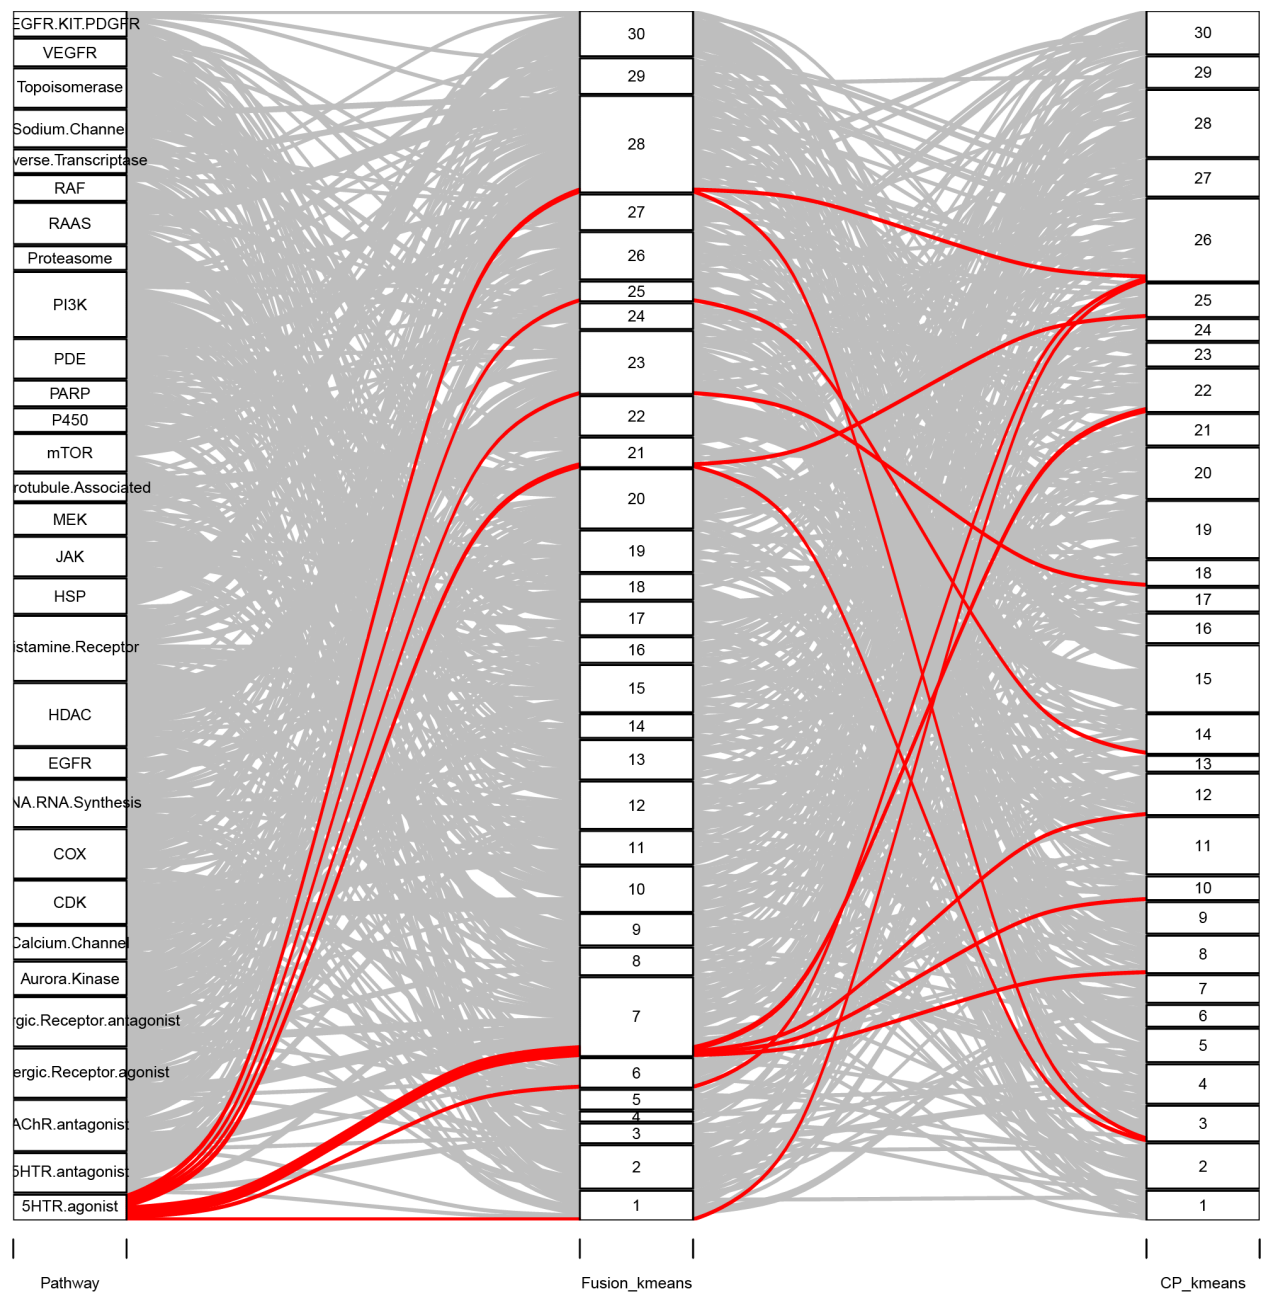



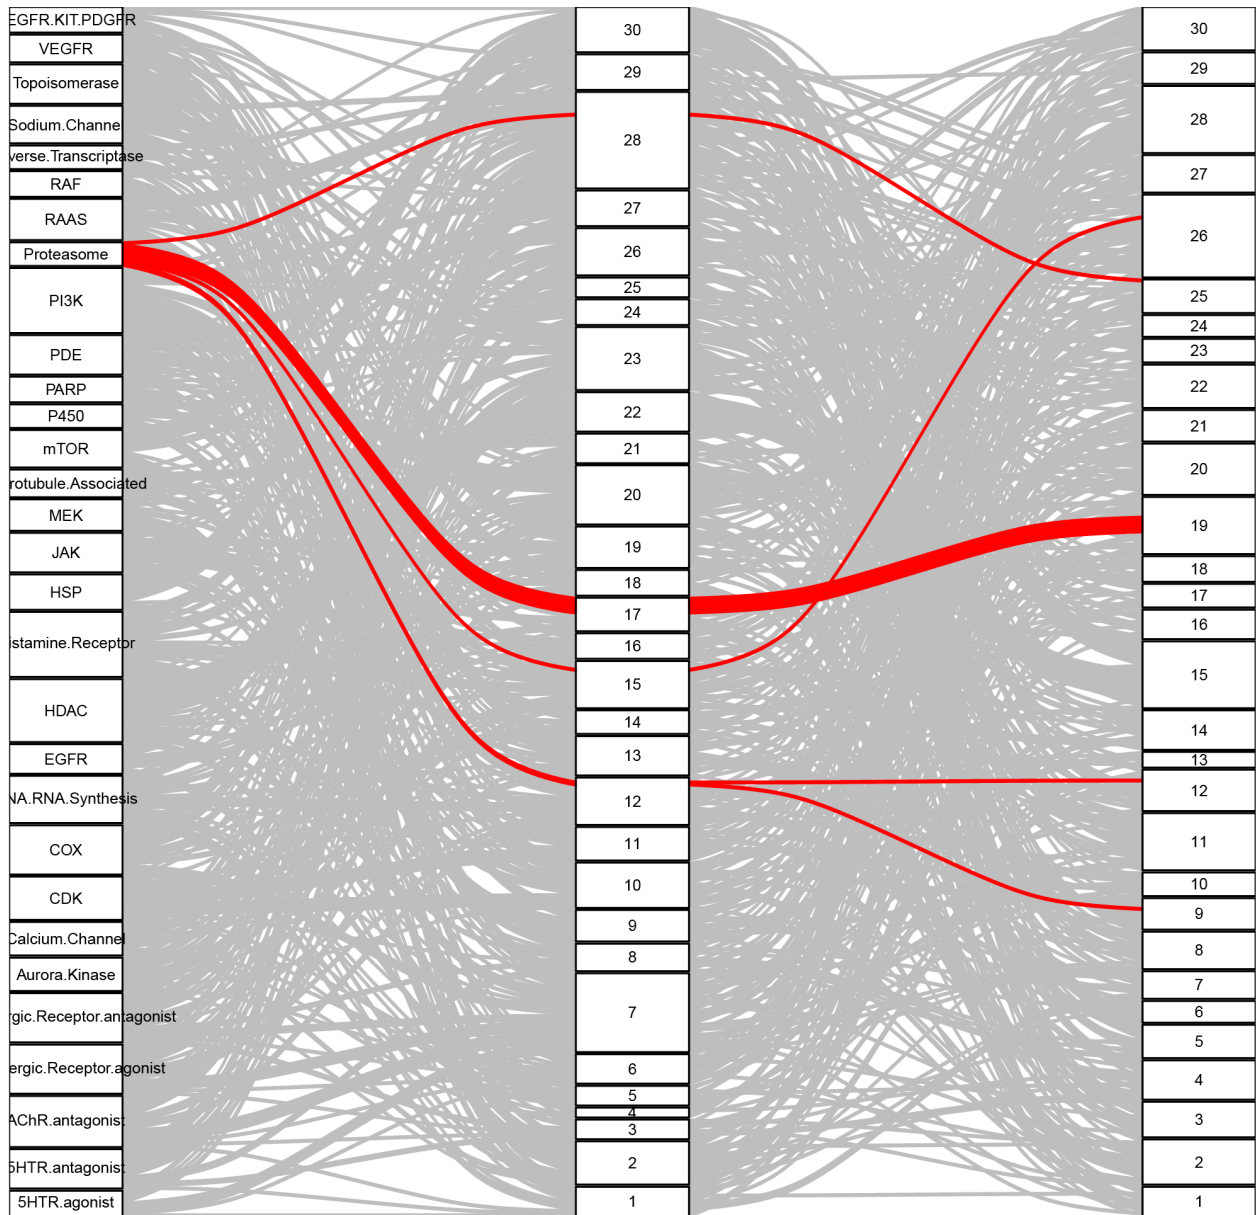

Pathway

Fusion\_kmeans

CP\_kmeans

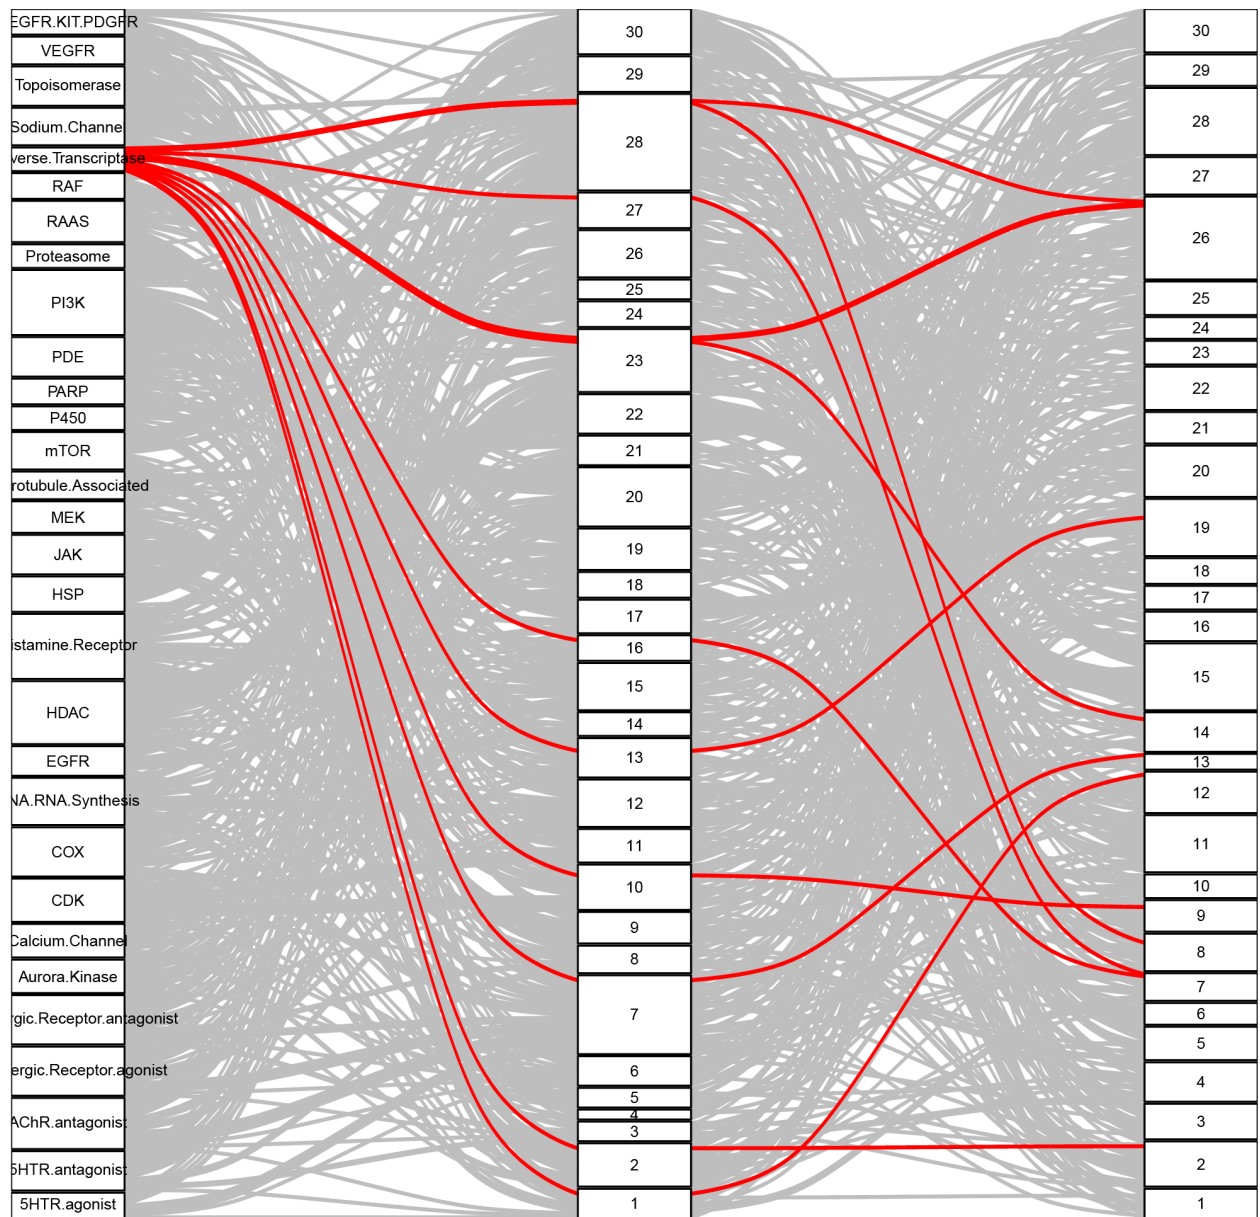

Pathway

Fusion\_kmeans

CP\_kmeans

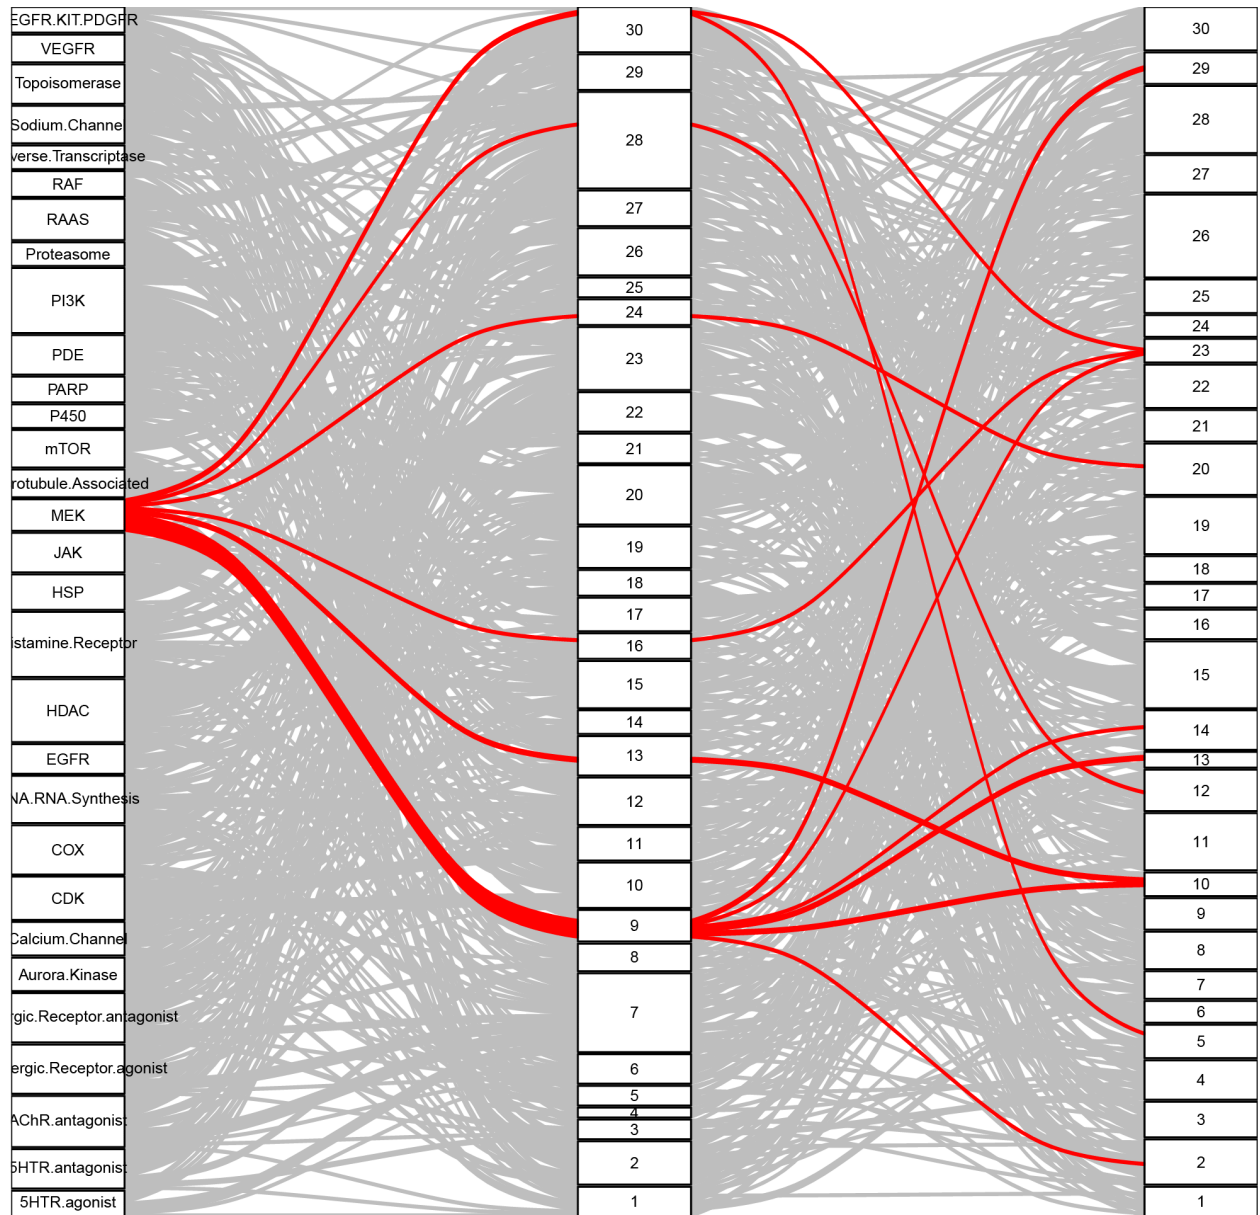

Pathway

Fusion\_kmeans

CP\_kmeans

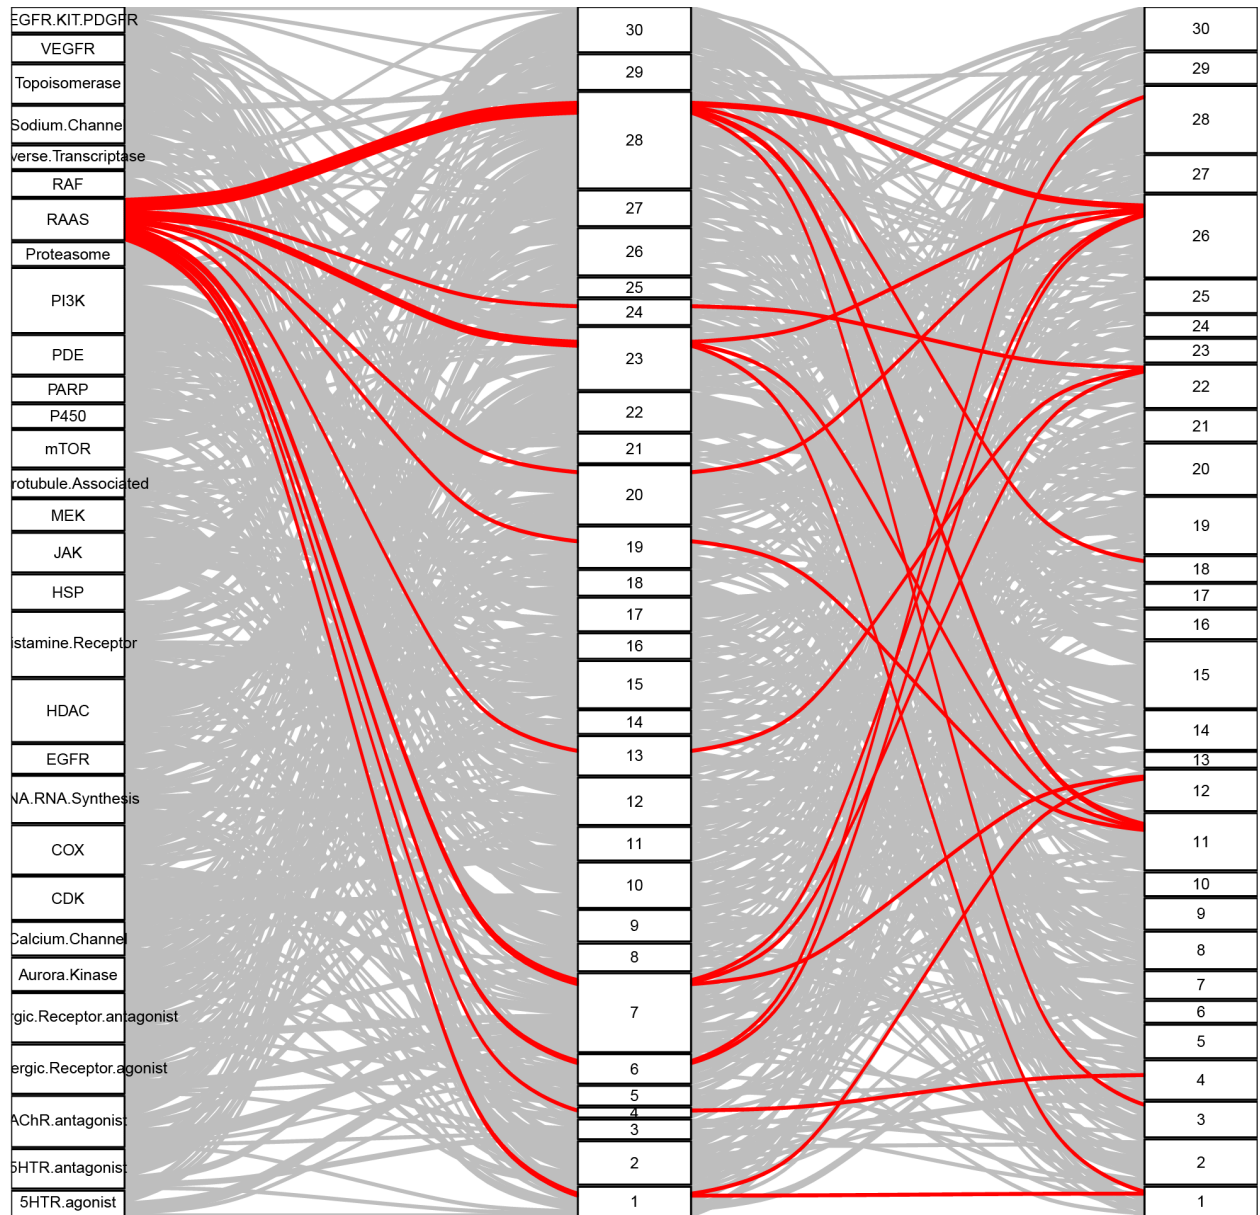

Pathway | Fusion\_kmeans | CP\_kmeans

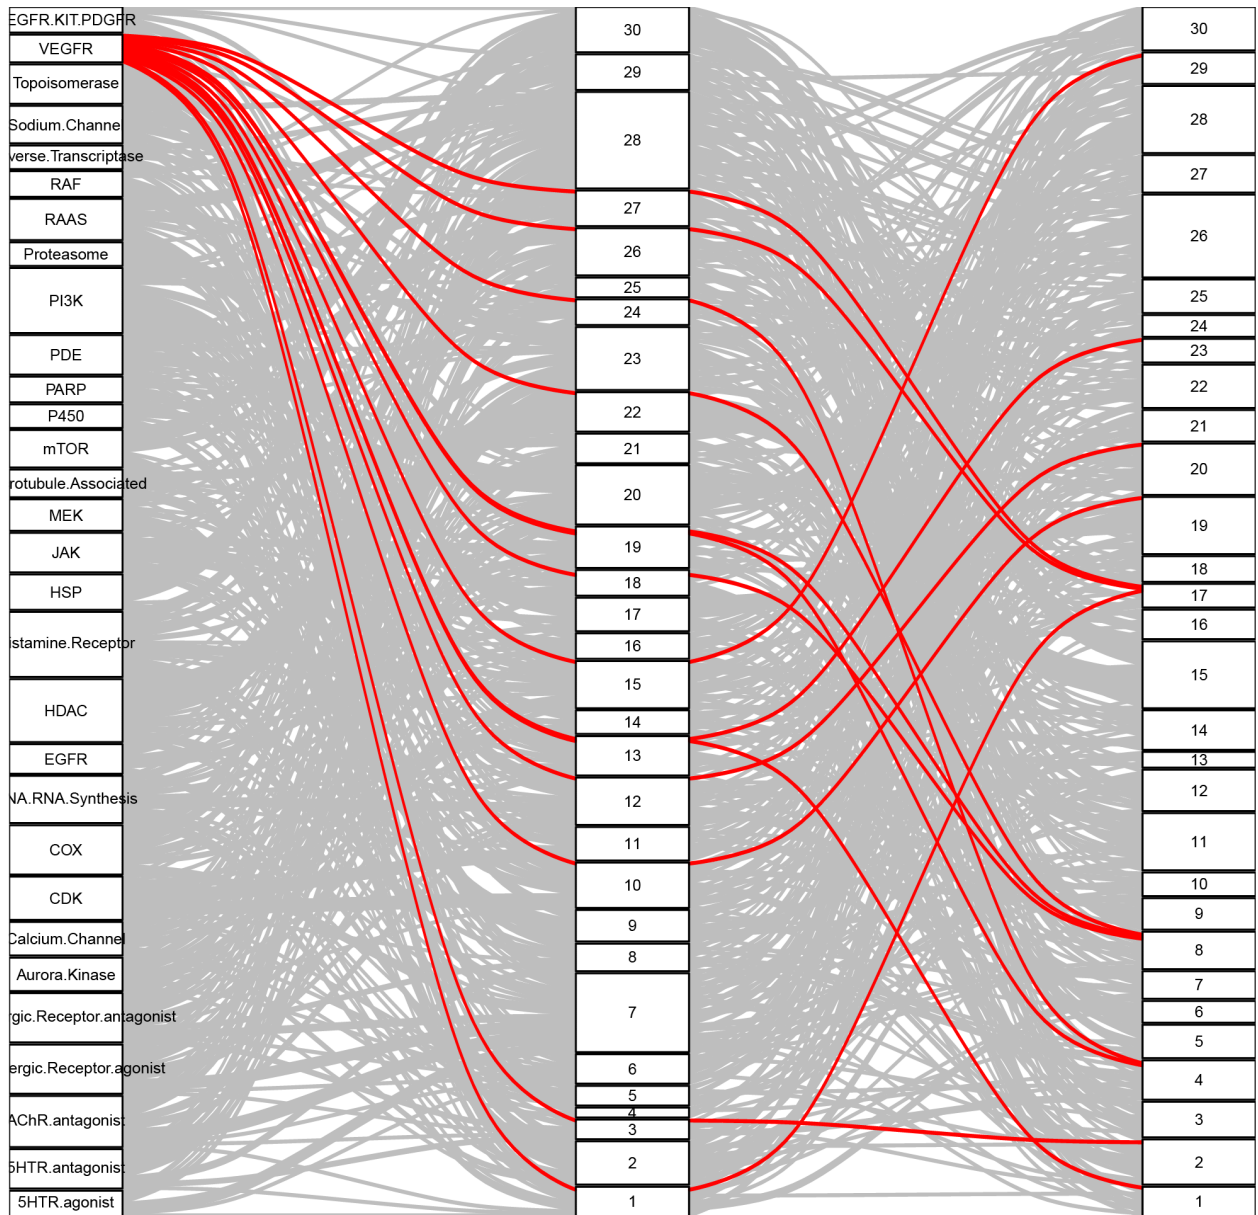

Pathway Fusion\_kmeans CP\_kmeans

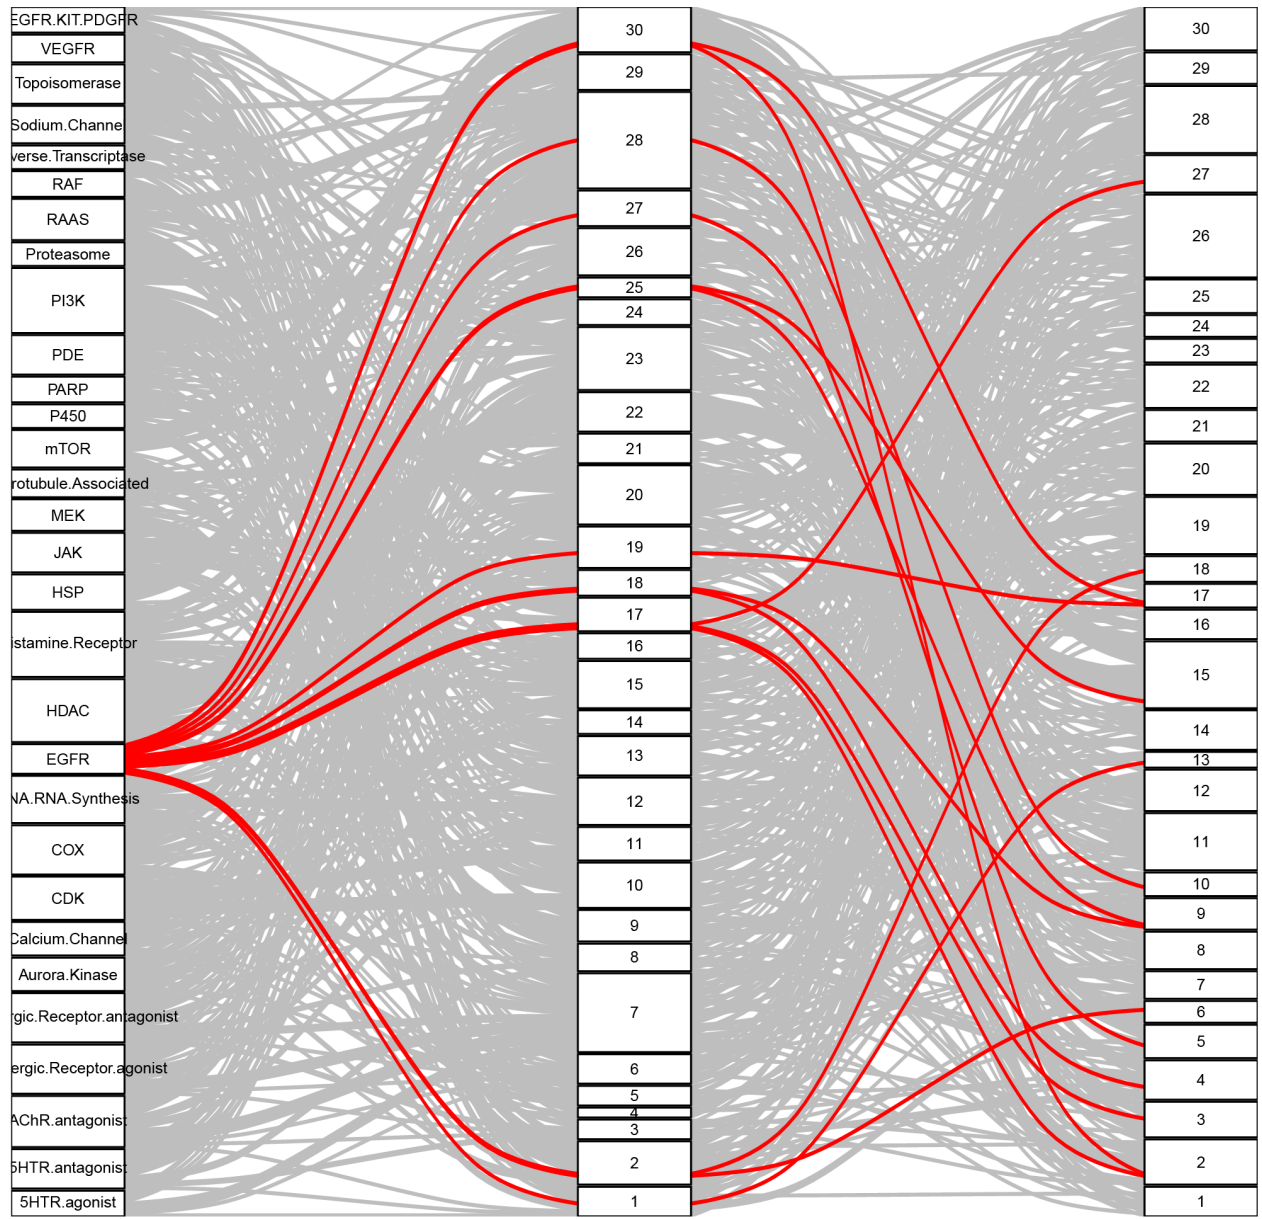

| Pathway                   | Fusion_kmeans | CP_kmeans |
|---------------------------|---------------|-----------|
| EGFR.KIT.PDGFR            | 30            | 30        |
| VEGFR                     | 29            | 29        |
| Topoisomerase             | 28            | 28        |
| Sodium.Channel            | 27            | 27        |
| reverse.Transcriptase     | 26            | 26        |
| RAF                       | 25            | 25        |
| RAAS                      | 24            | 24        |
| Proteasome                | 23            | 23        |
| PI3K                      | 22            | 22        |
| PDE                       | 21            | 21        |
| PARP                      | 20            | 20        |
| P450                      | 19            | 19        |
| mTOR                      | 18            | 18        |
| Microtubule.Associated    | 17            | 17        |
| MEK                       | 16            | 16        |
| JAK                       | 15            | 15        |
| HSP                       | 14            | 14        |
| Histamine.Receptor        | 13            | 13        |
| HDAC                      | 12            | 12        |
| EGFR                      | 11            | 11        |
| DNA.RNA.Synthesis         | 10            | 10        |
| COX                       | 9             | 9         |
| CDK                       | 8             | 8         |
| Calcium.Channel           | 7             | 7         |
| Aurora.Kinase             | 6             | 6         |
| Opioid.Receptor.agonist   | 5             | 5         |
| Serergic.Receptor.agonist | 4             | 4         |
| AChR.antagonist           | 3             | 3         |
| 5HTA.antagonist           | 2             | 2         |
| 5HTA.agonist              | 1             | 1         |

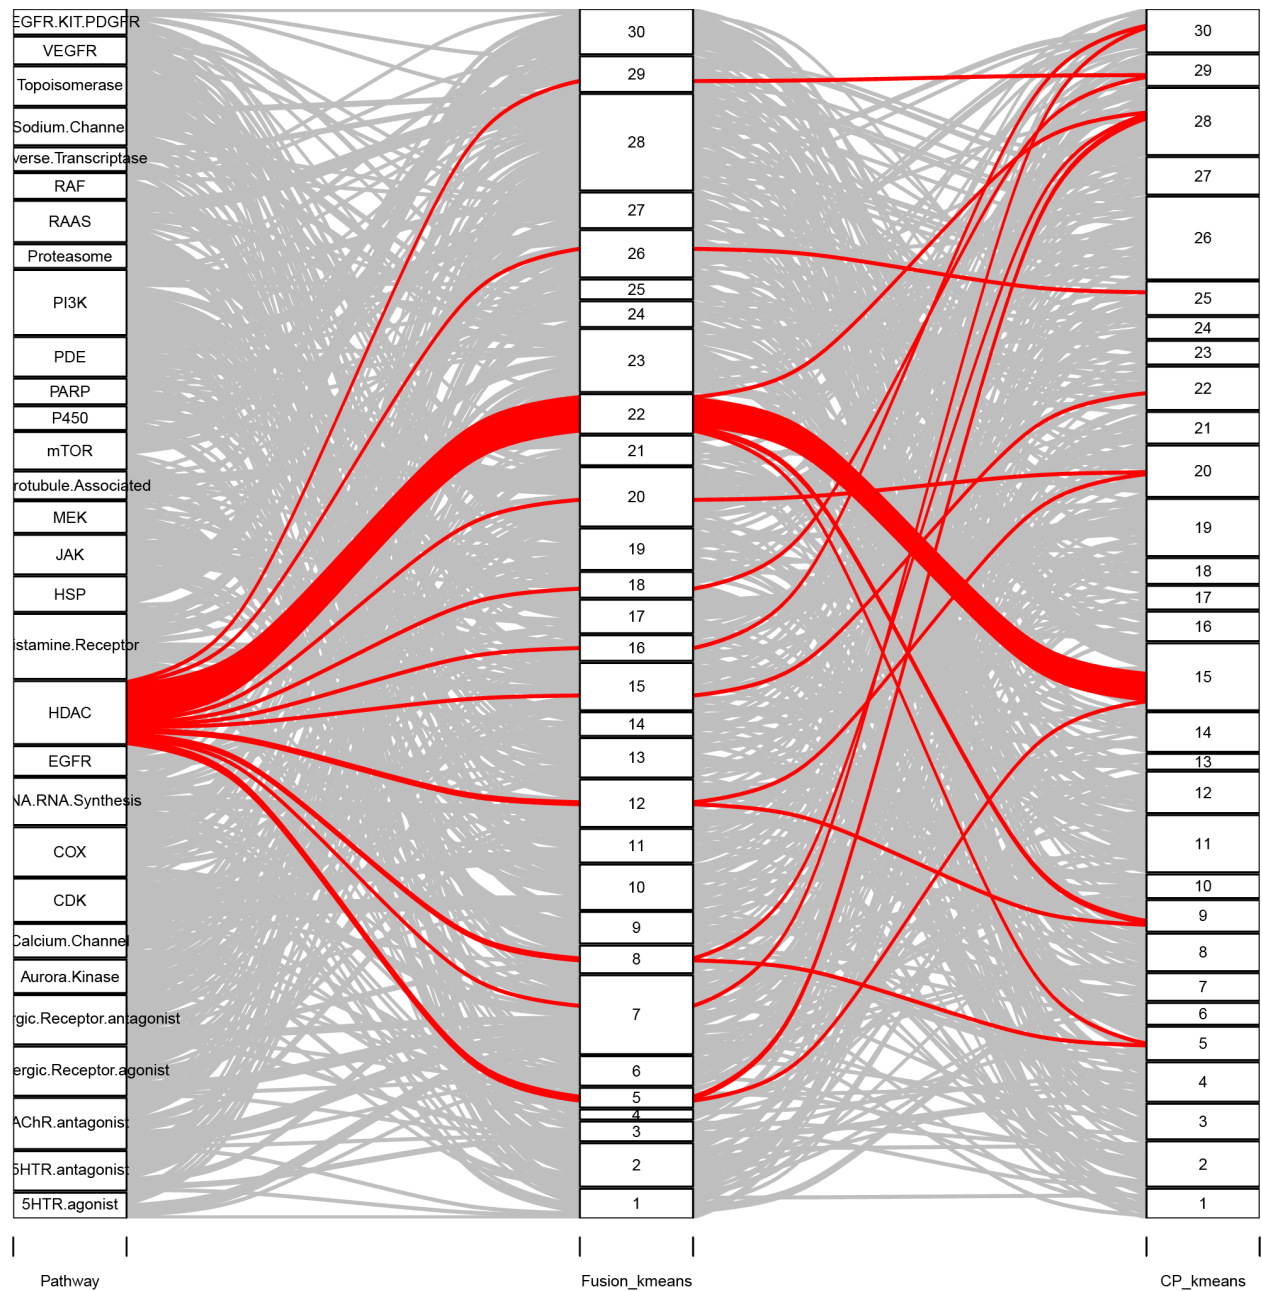

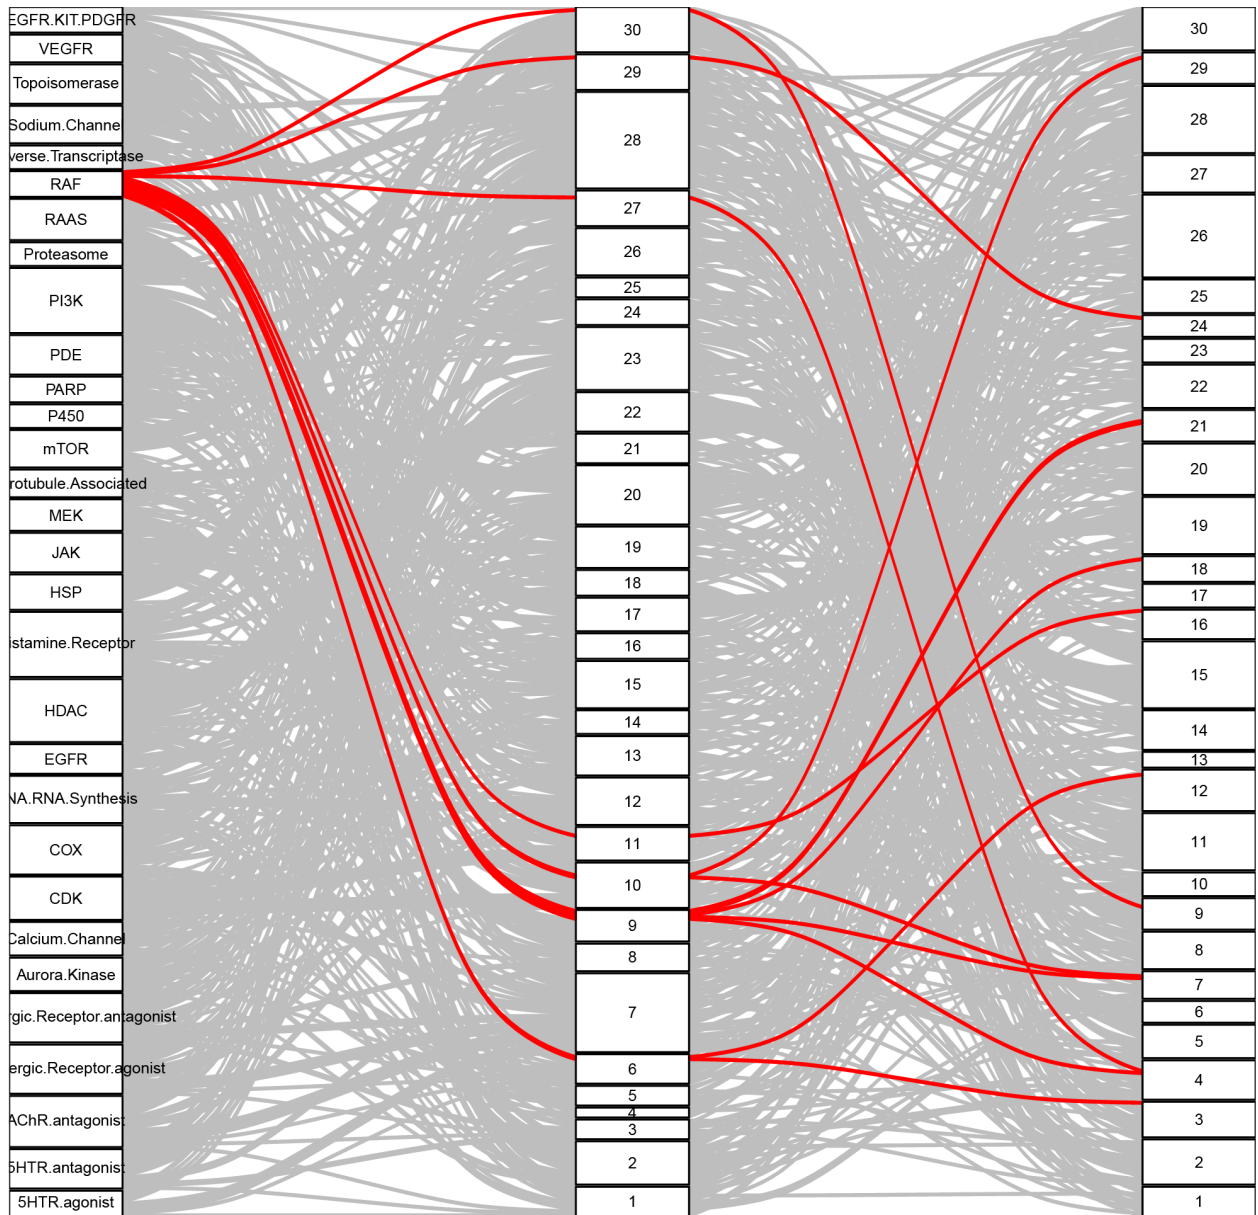

Pathway

Fusion\_kmeans

CP\_kmeans



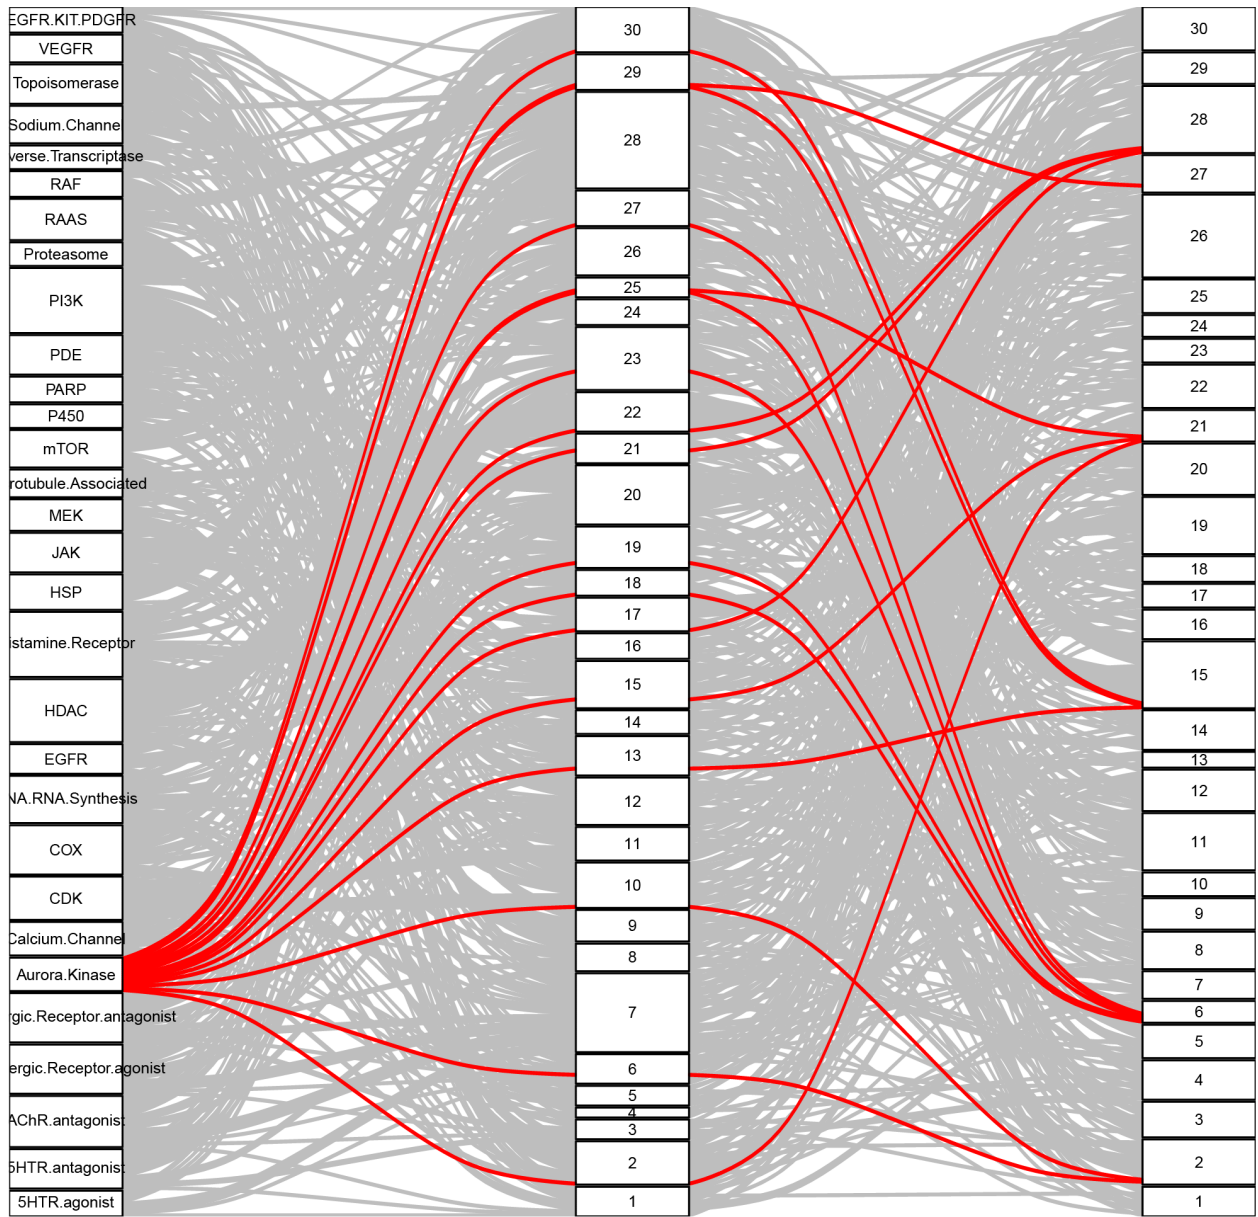

Pathway Fusion\_kmeans CP\_kmeans

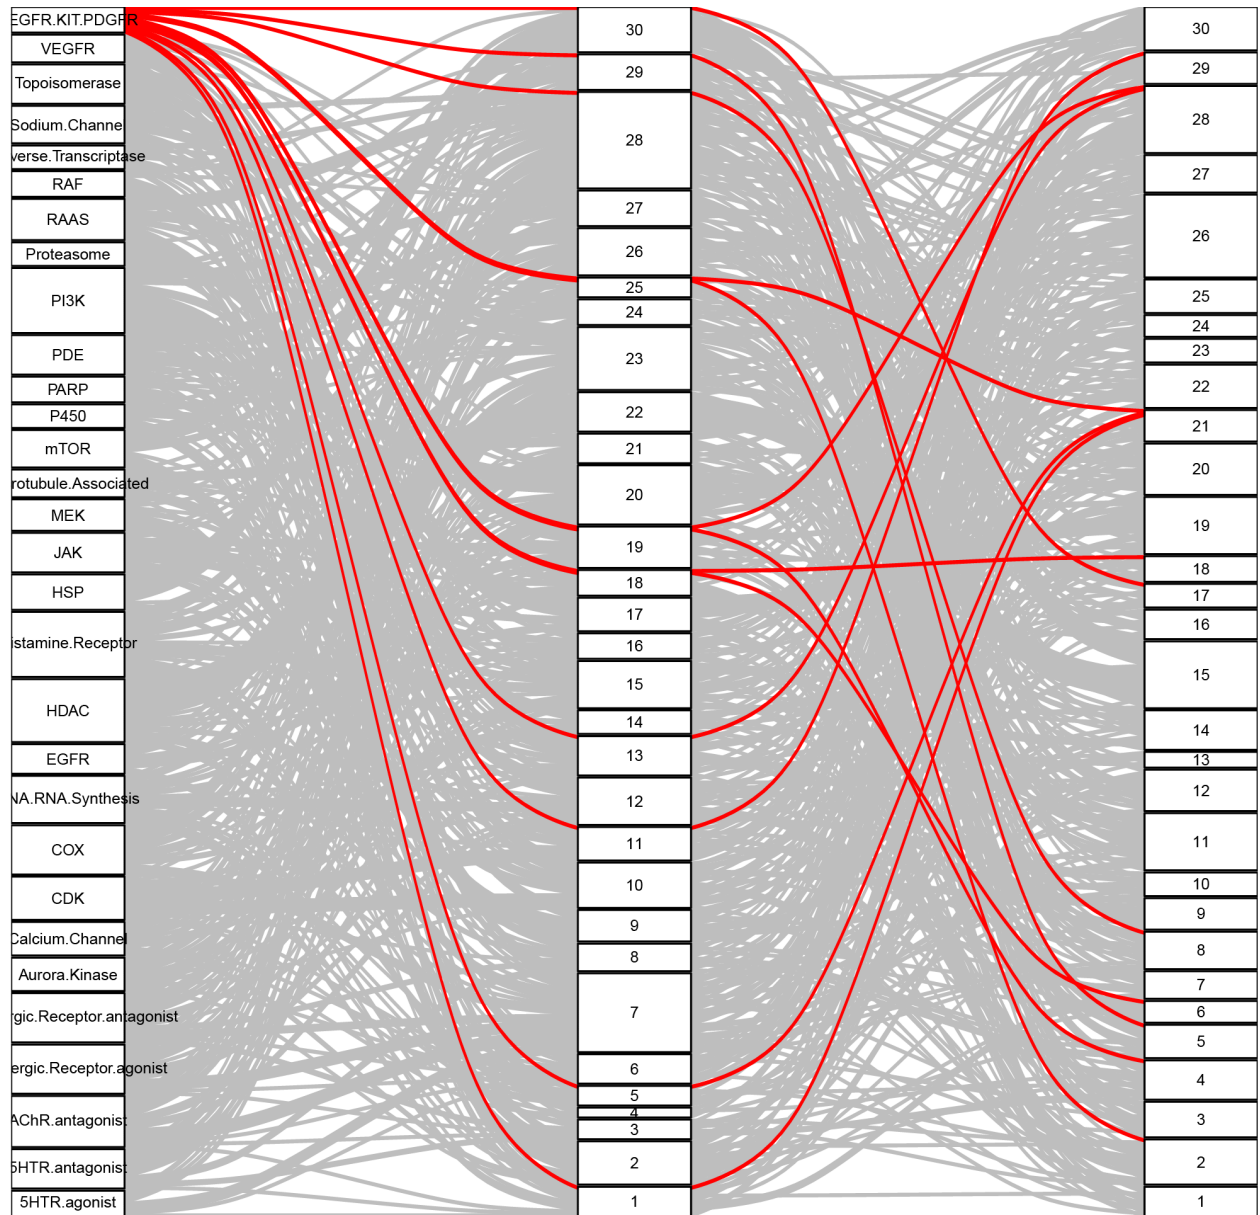

Pathway | Fusion\_kmeans | CP\_kmeans

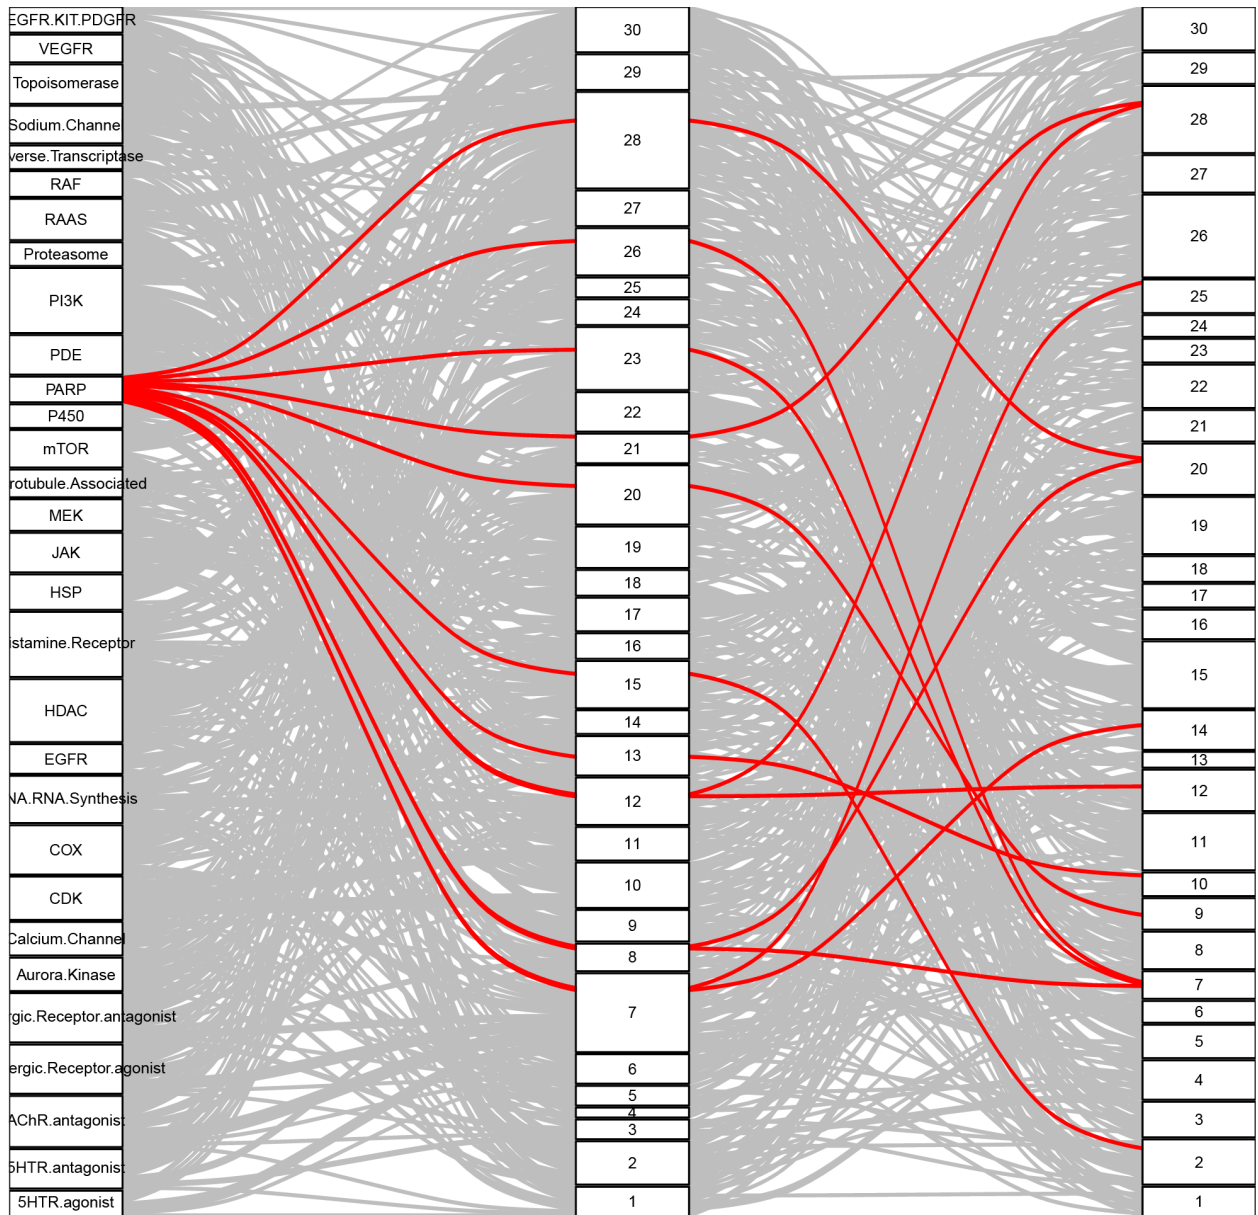

Pathway

Fusion\_kmeans

CP\_kmeans

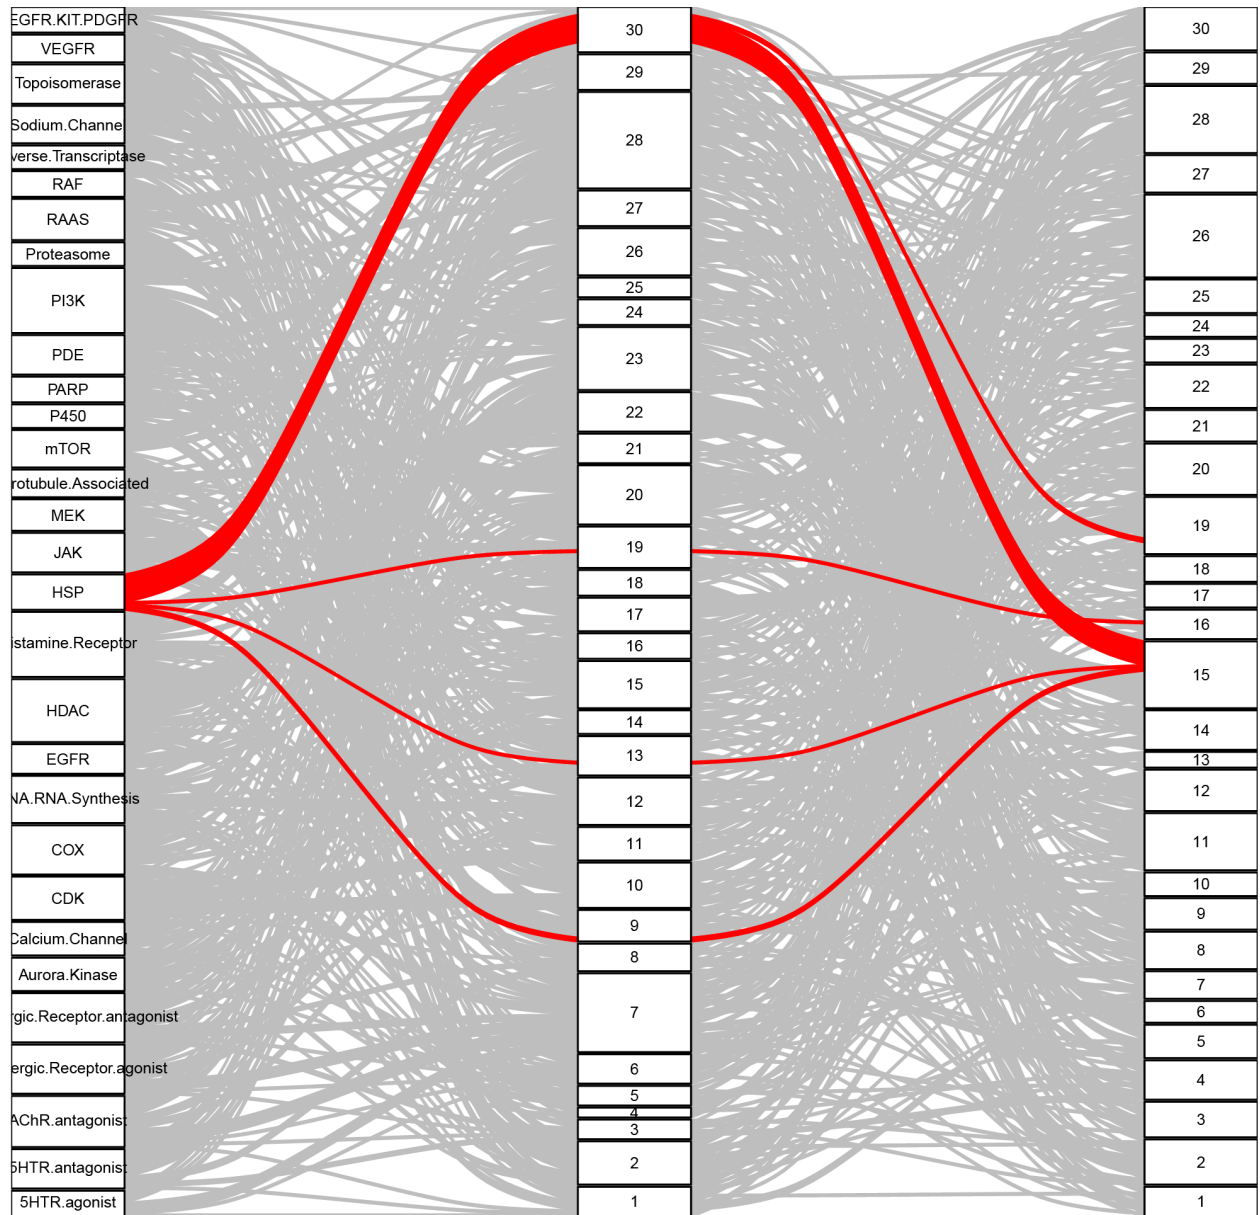

Pathway Fusion\_kmeans CP\_kmeans

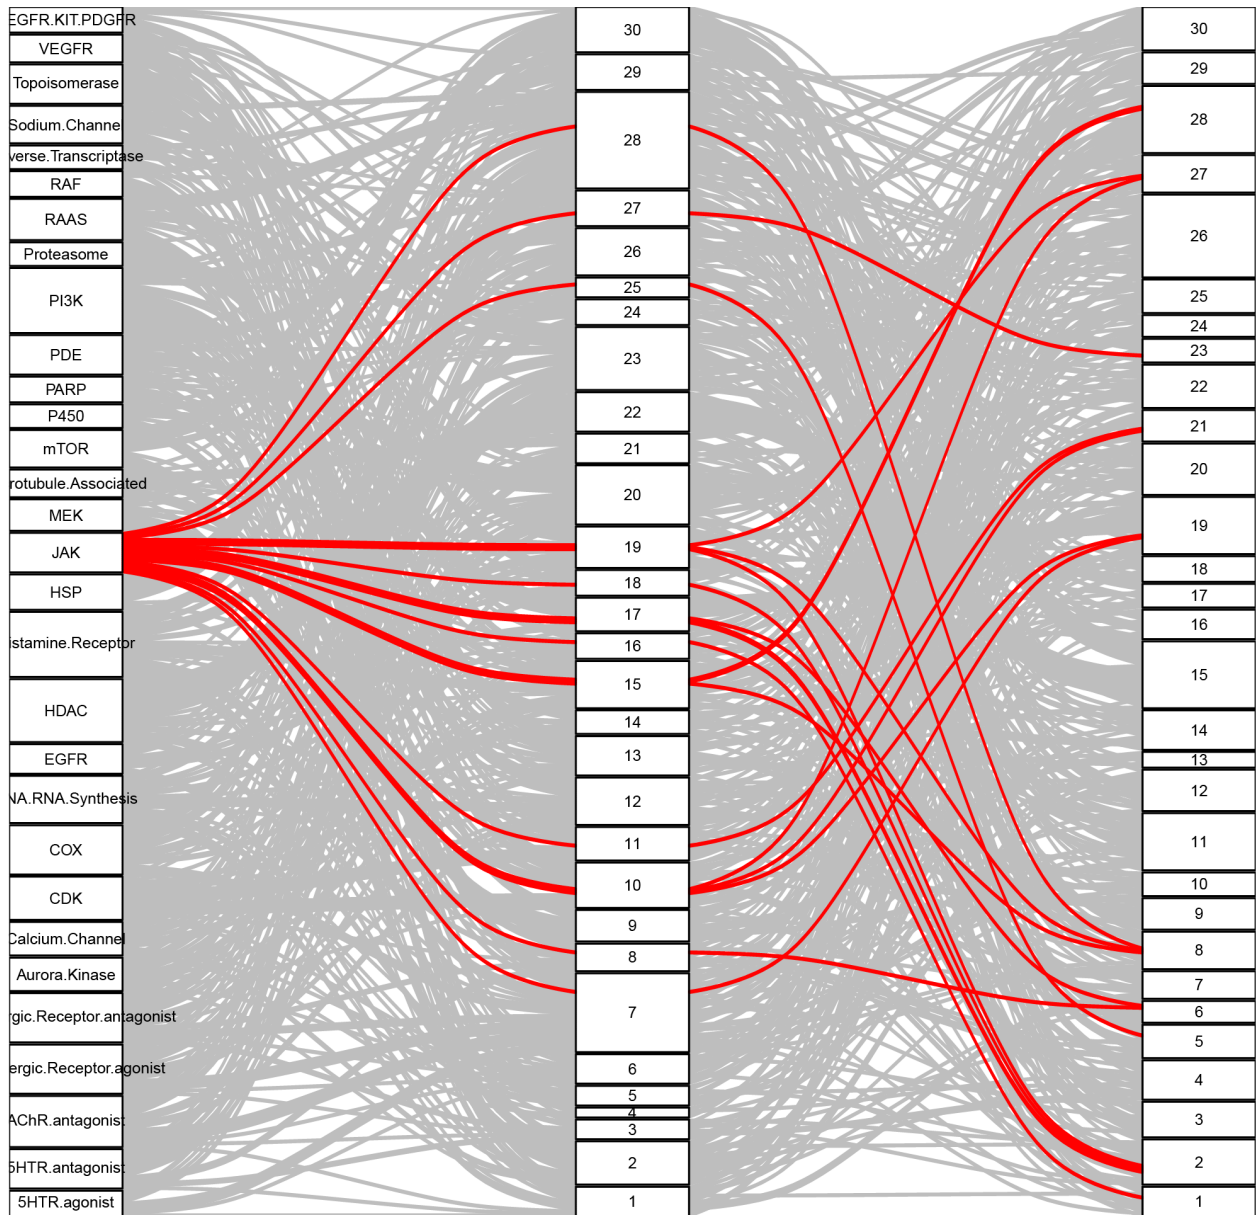

Pathway

Fusion\_kmeans

CP\_kmeans

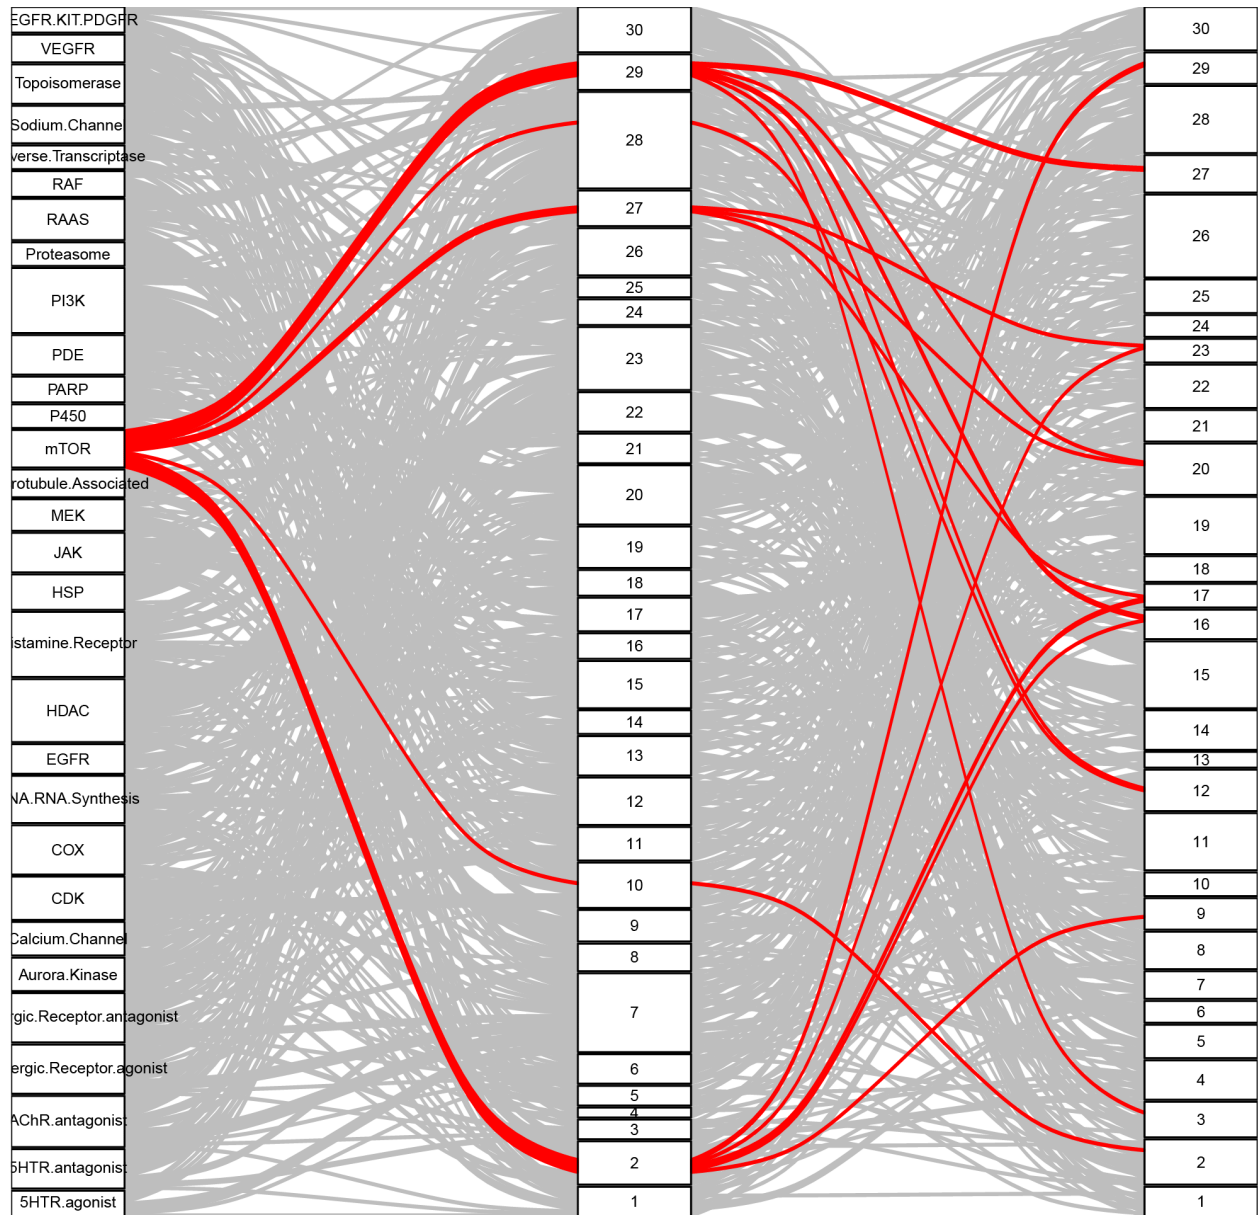

Pathway Fusion\_kmeans CP\_kmeans

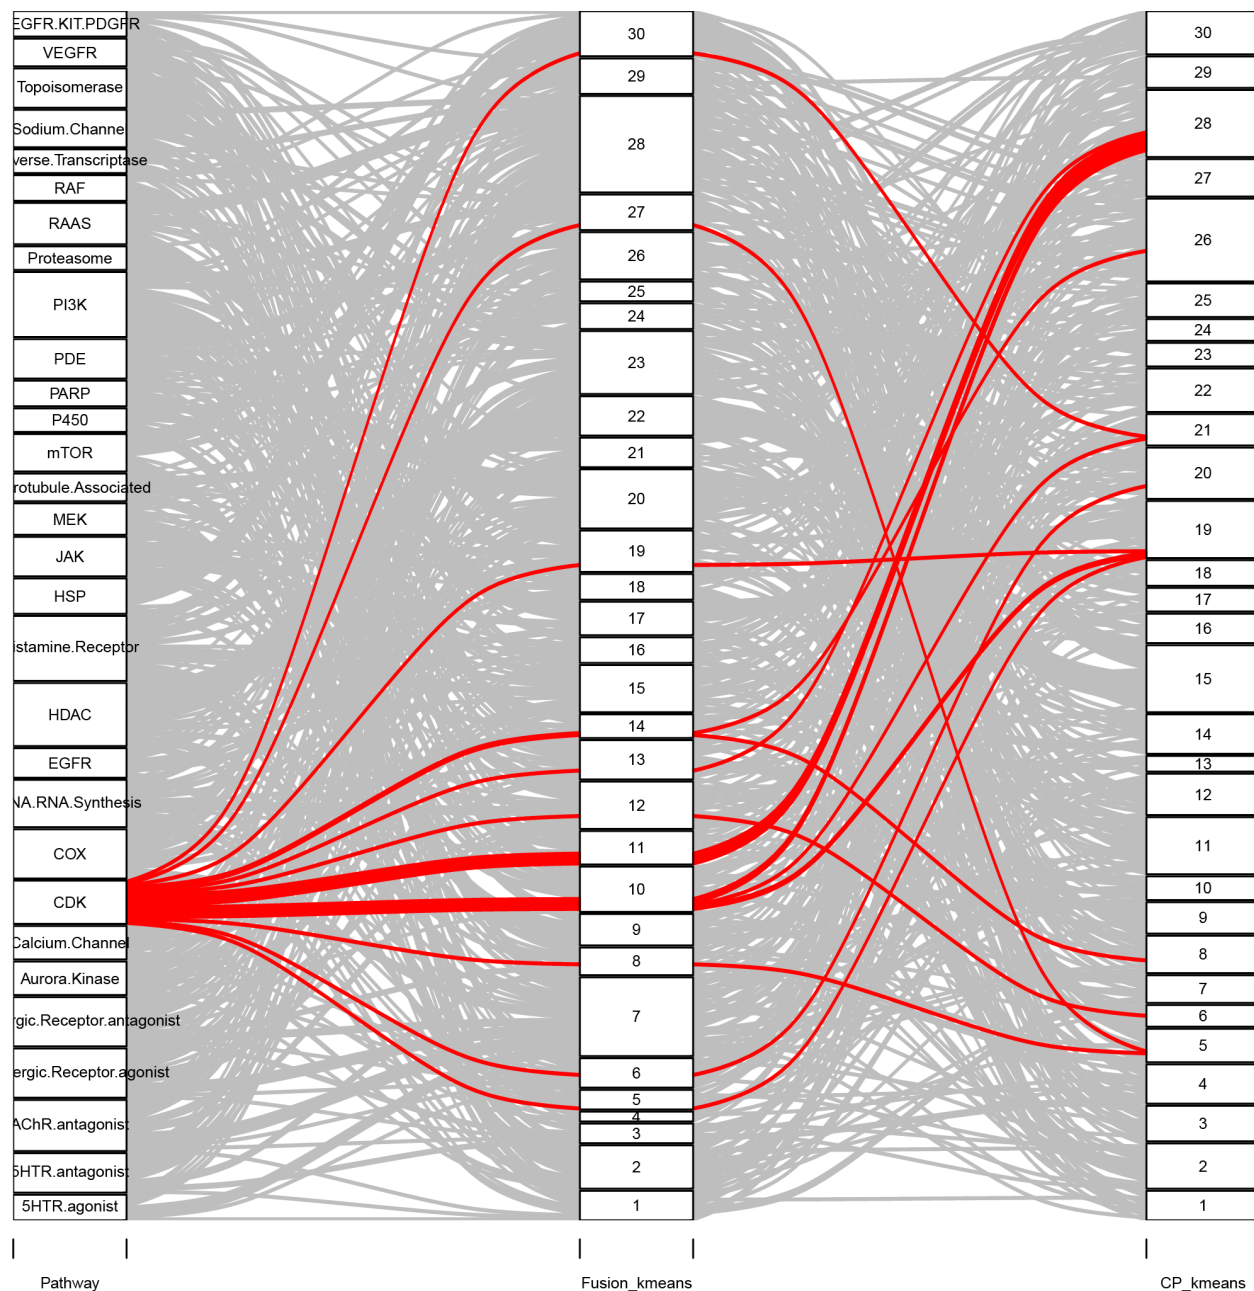

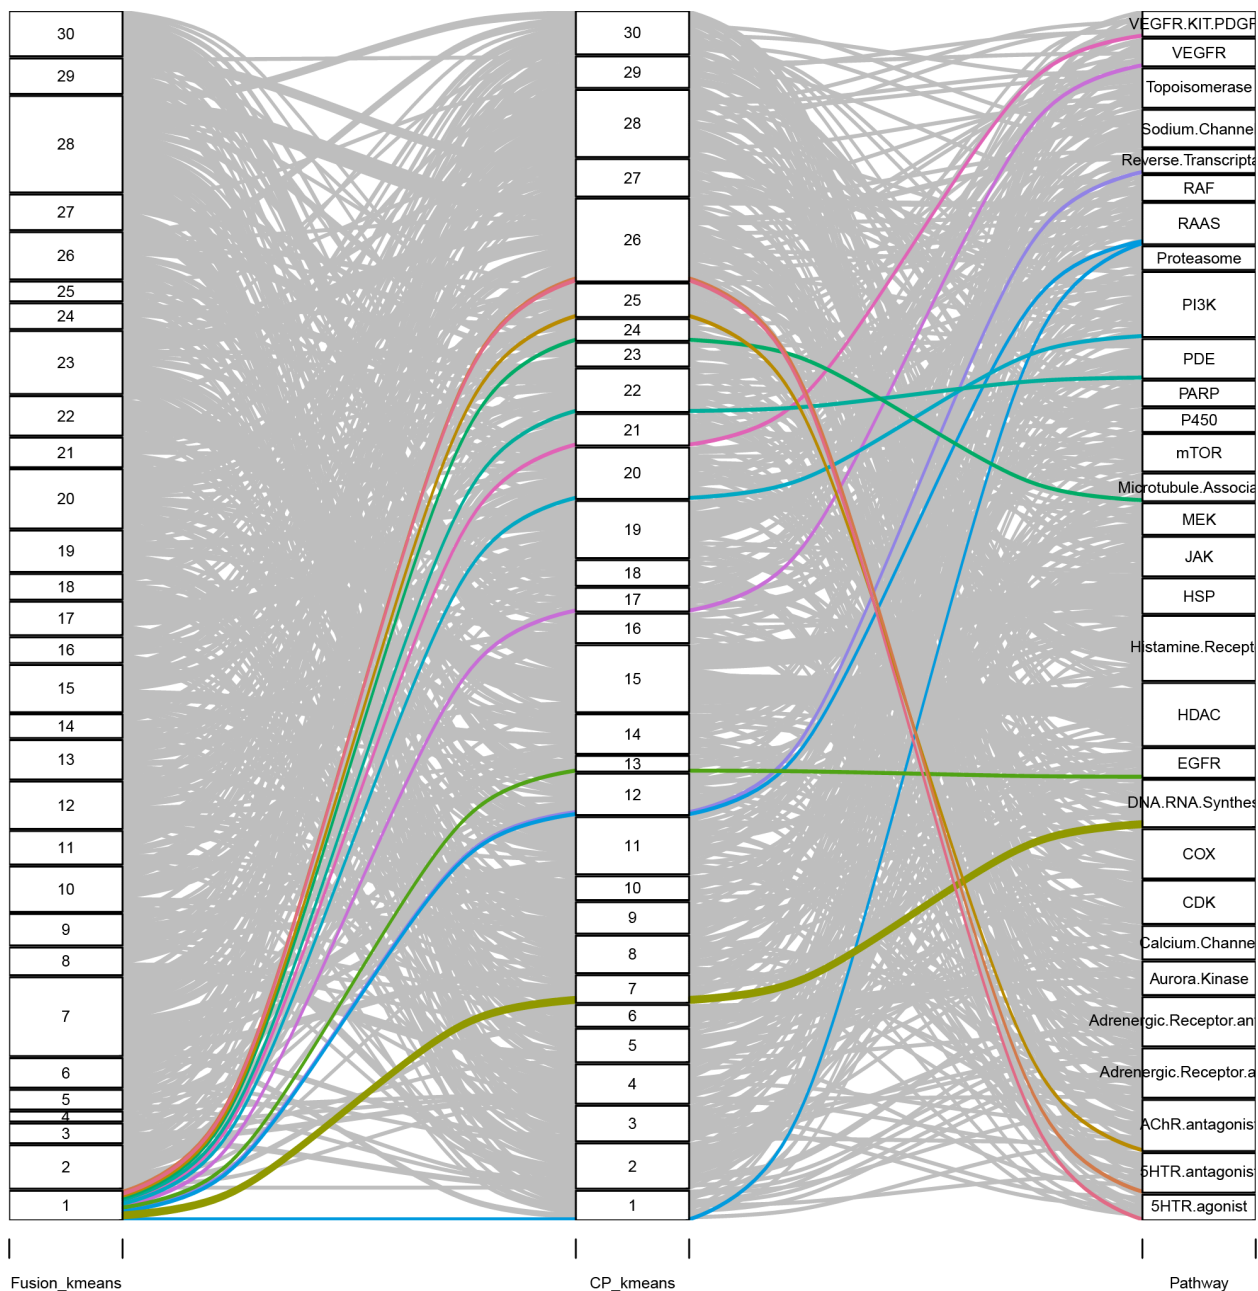

**Supplementary Figure 6. Alluvial diagrams for each cluster in FUSION and each cluster in CP.** Alluvial diagrams for each k-means cluster in the FUSION (A) and CP (B) datasets. Comparison of target class associations using k-means clustering (k=30) of FUSION and CP signatures for the top 30 target classes in the Selleck chemical library. Each line represents a compound, and each panel highlights a different cluster. Chemicals belonging to different target classes are indicated by different colors.



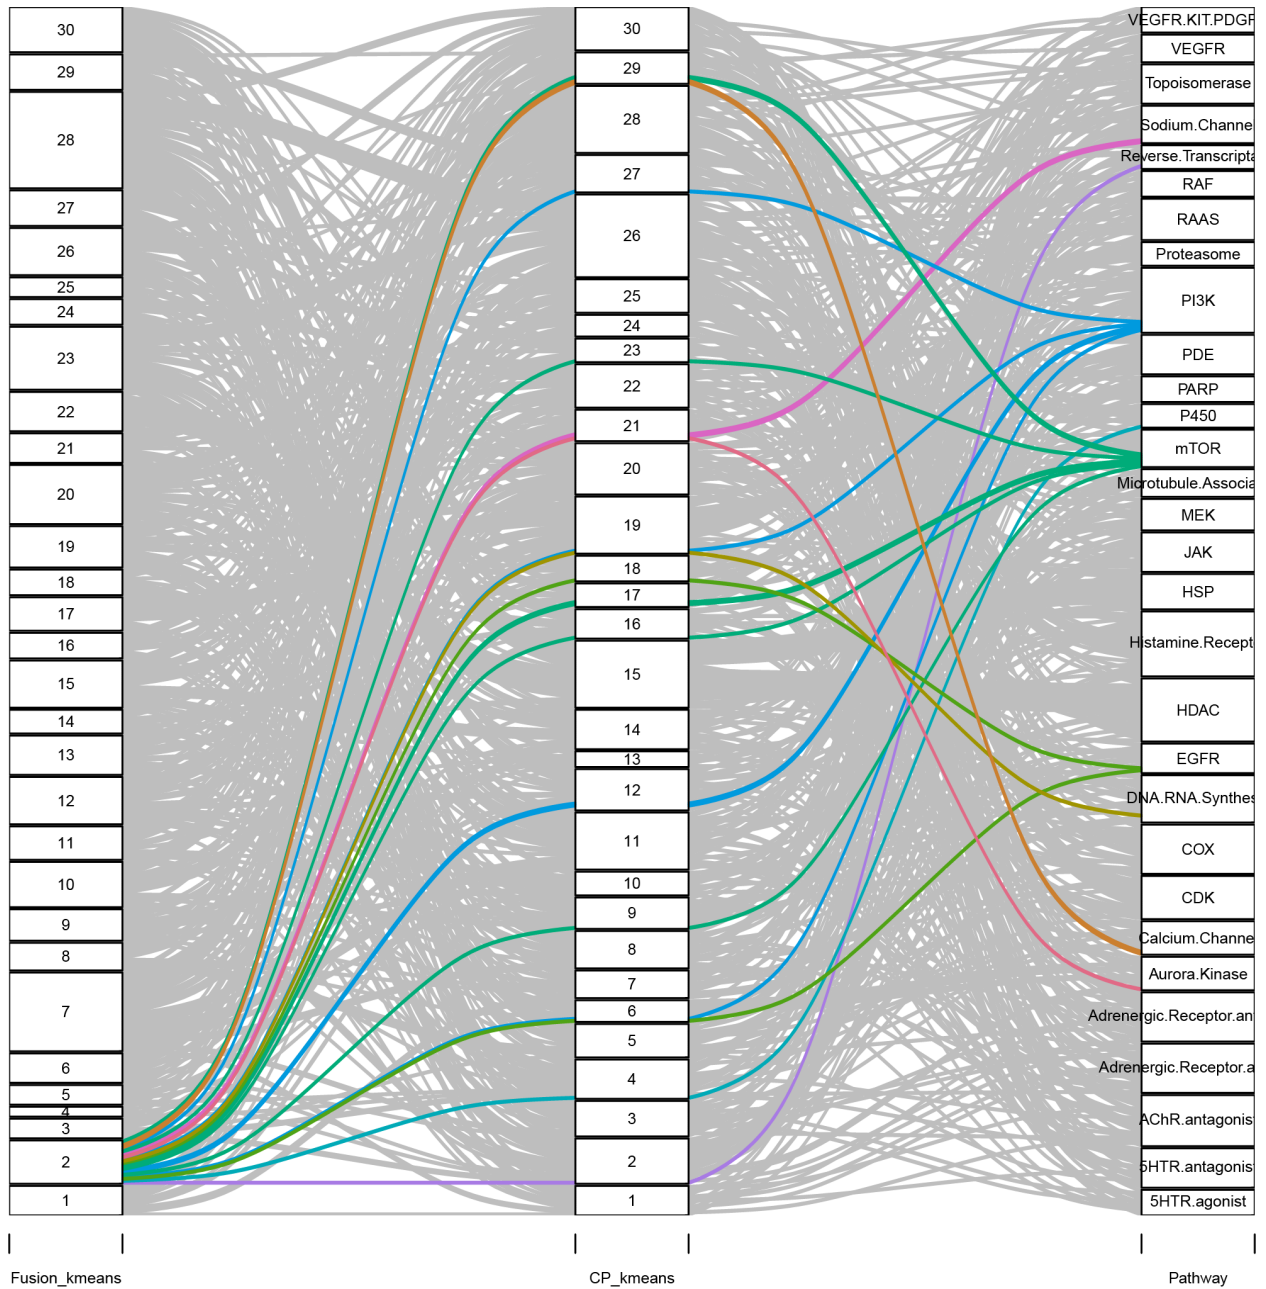

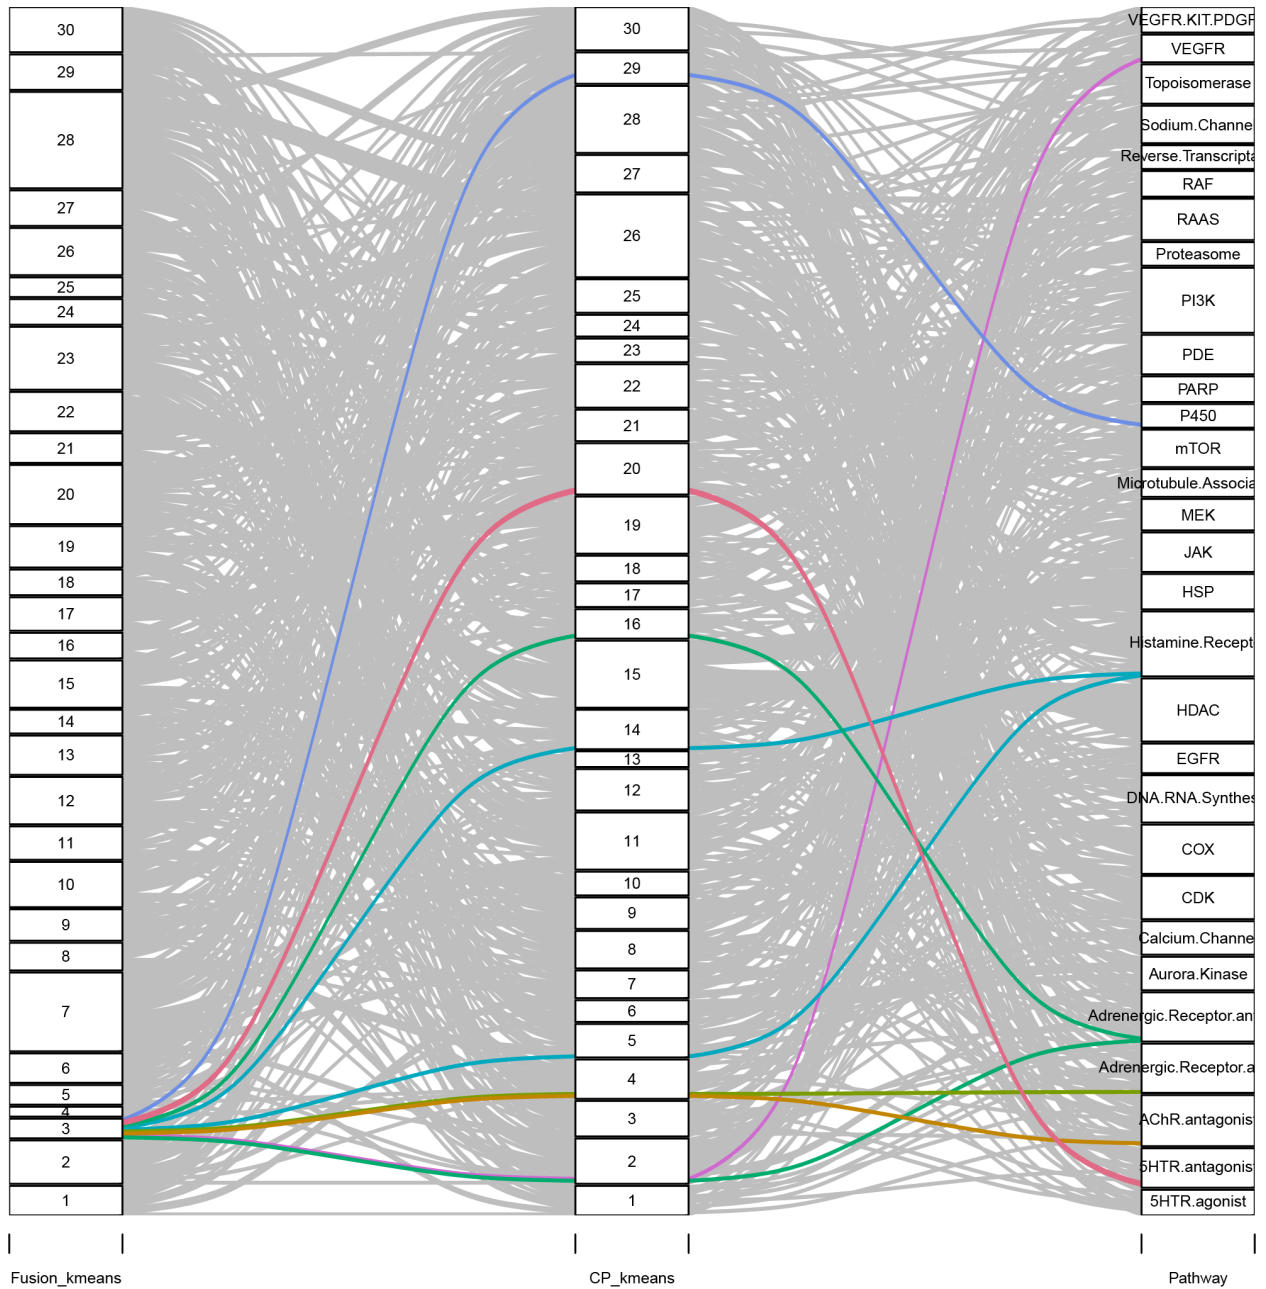

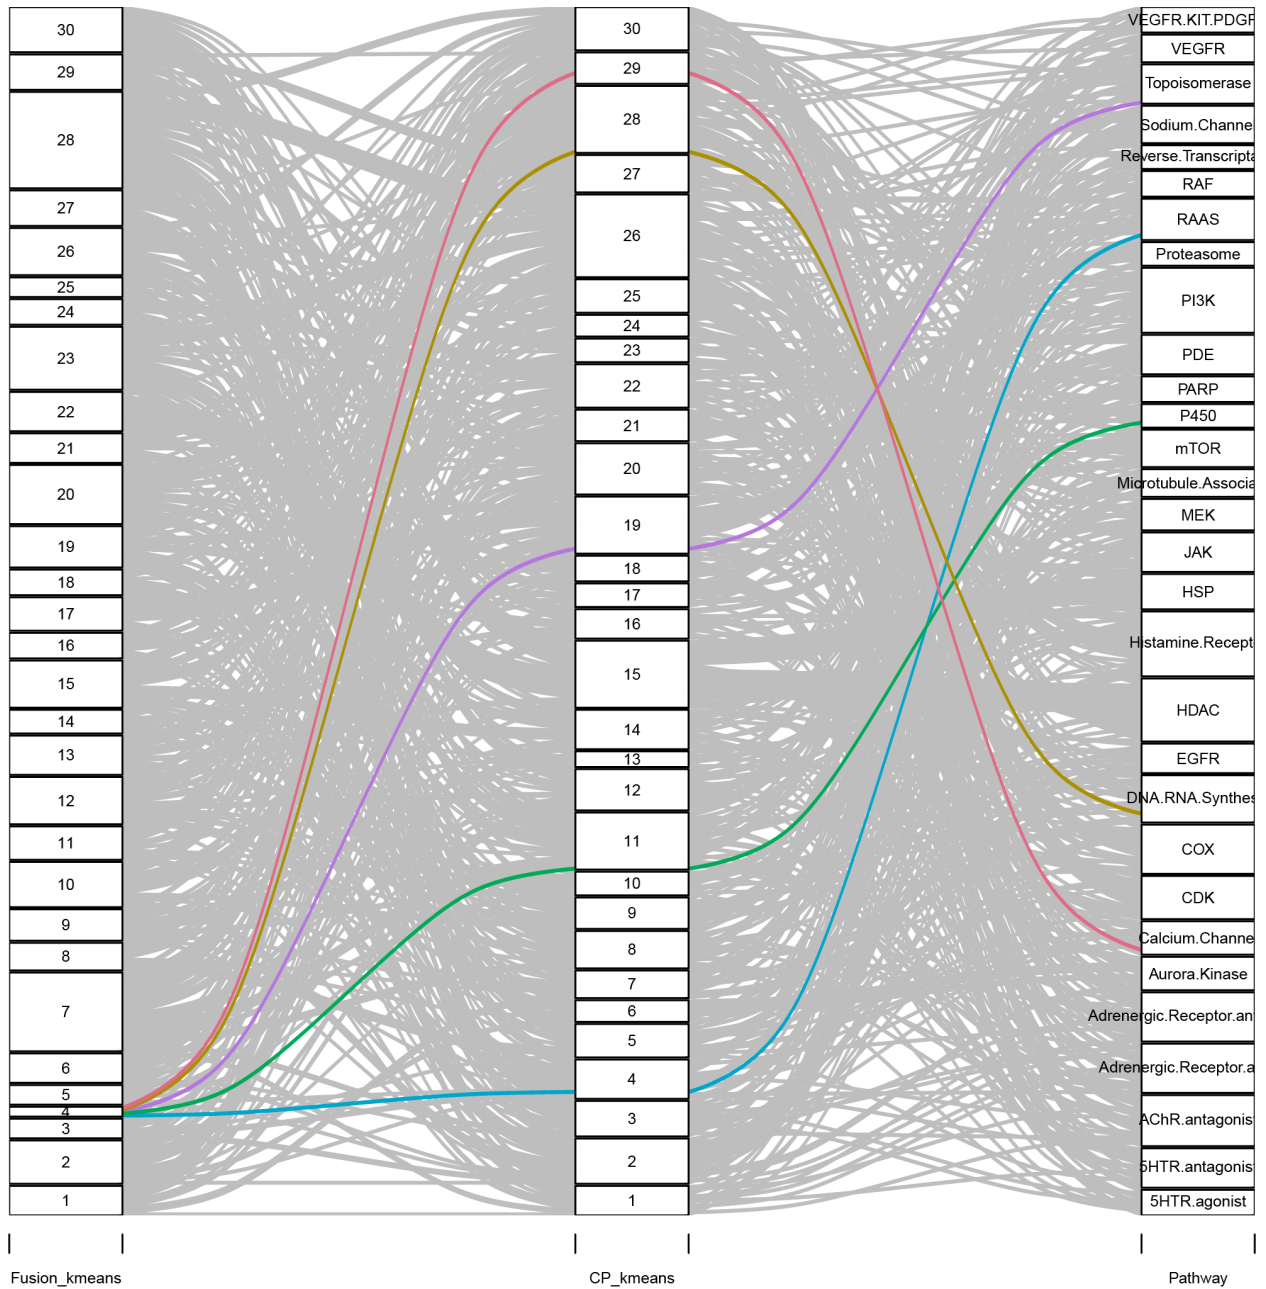

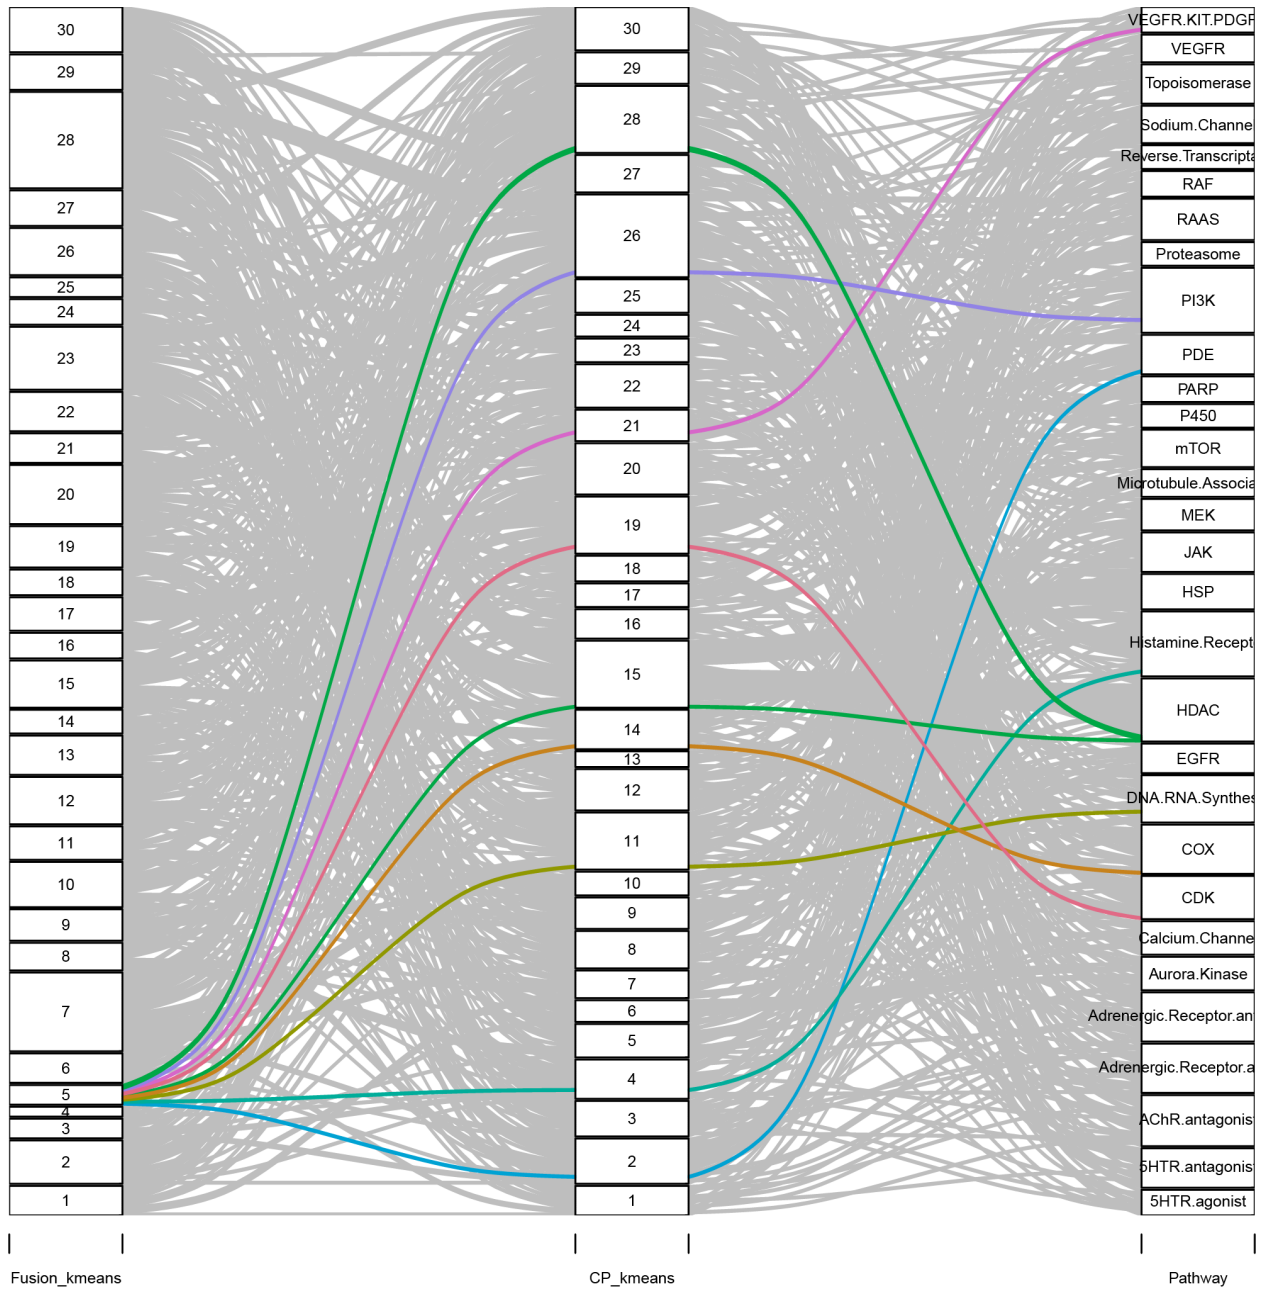

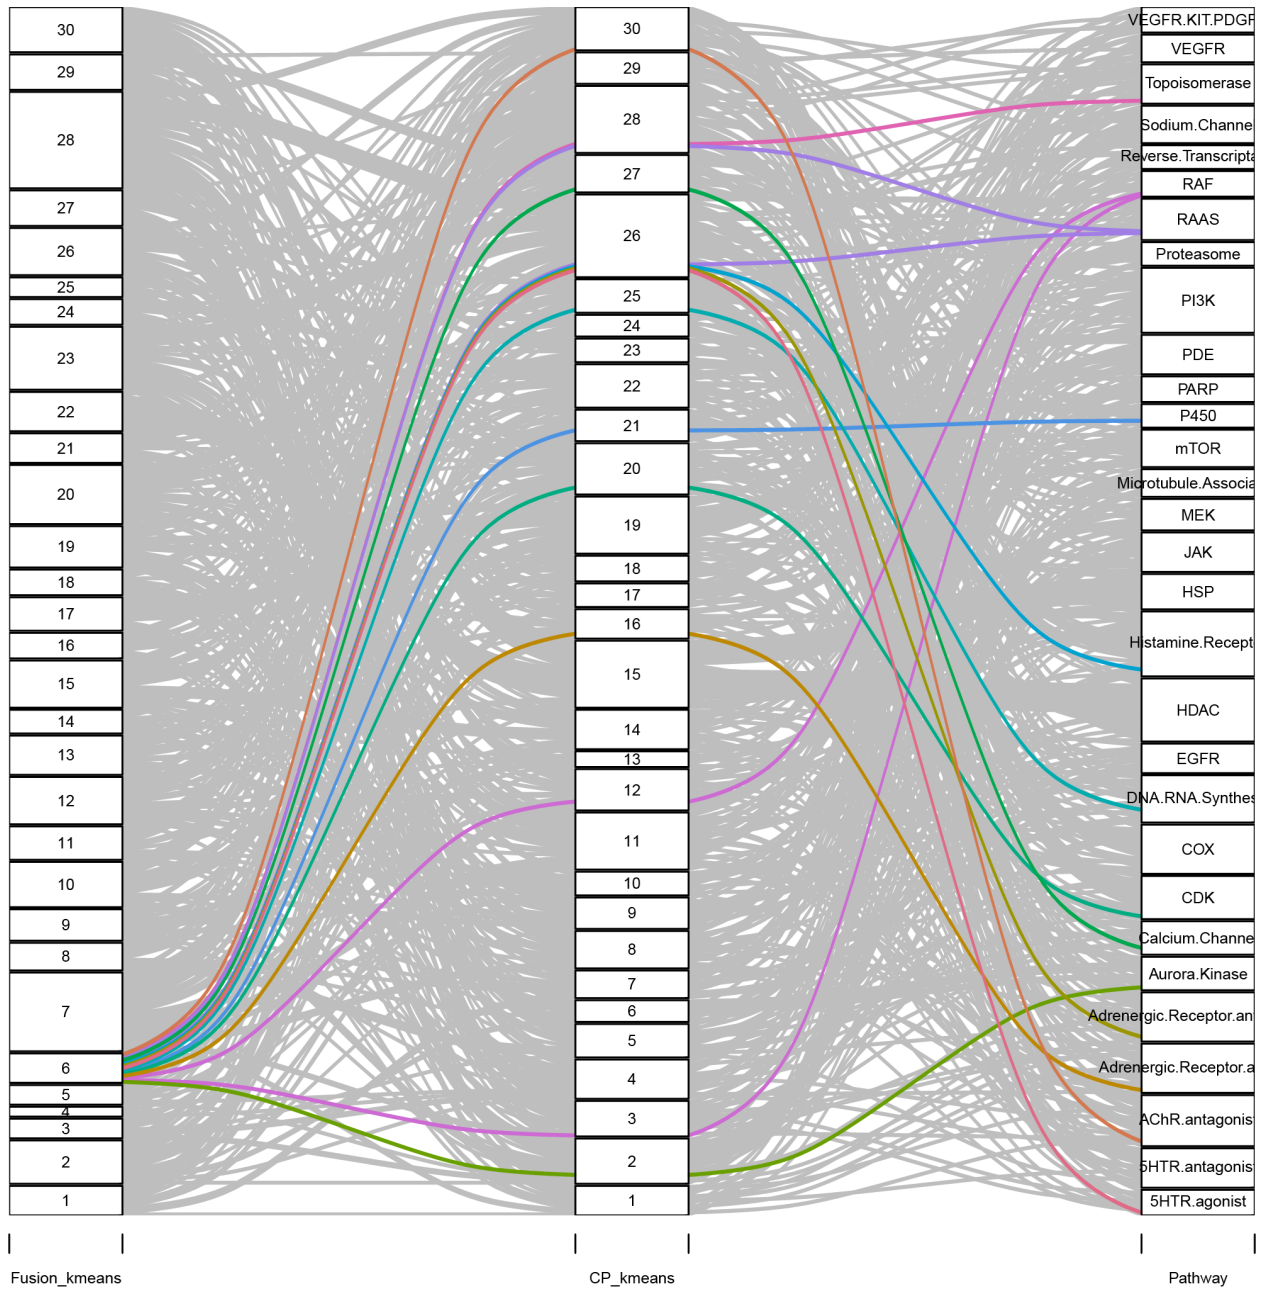

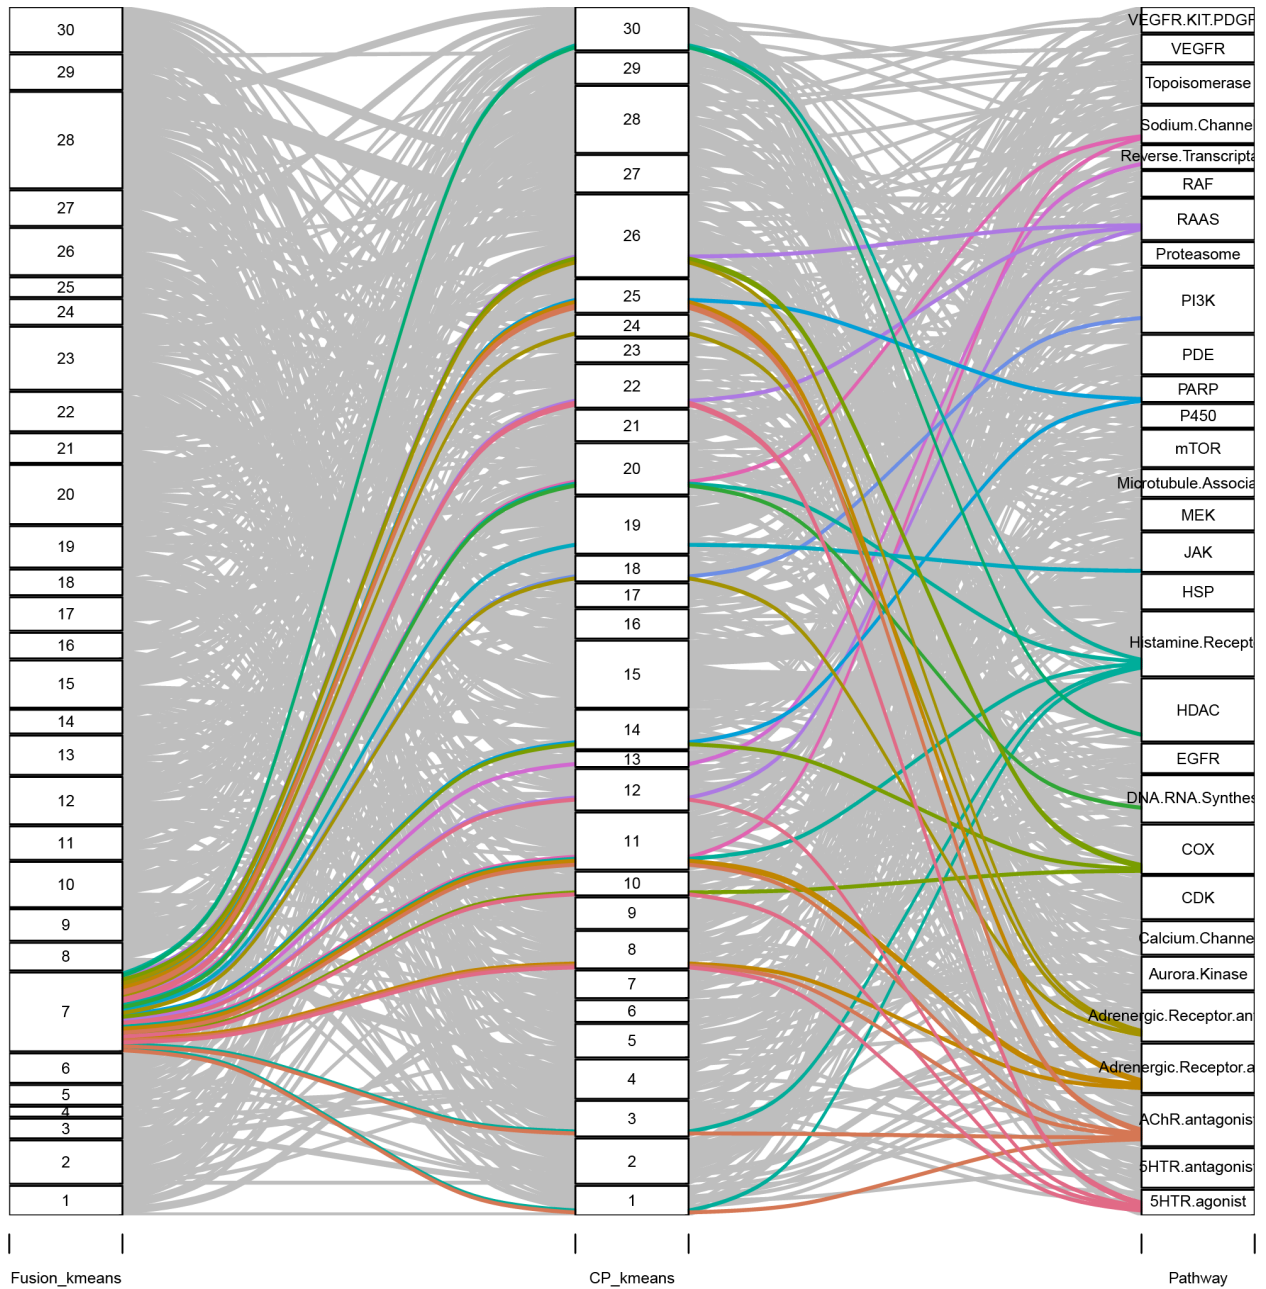

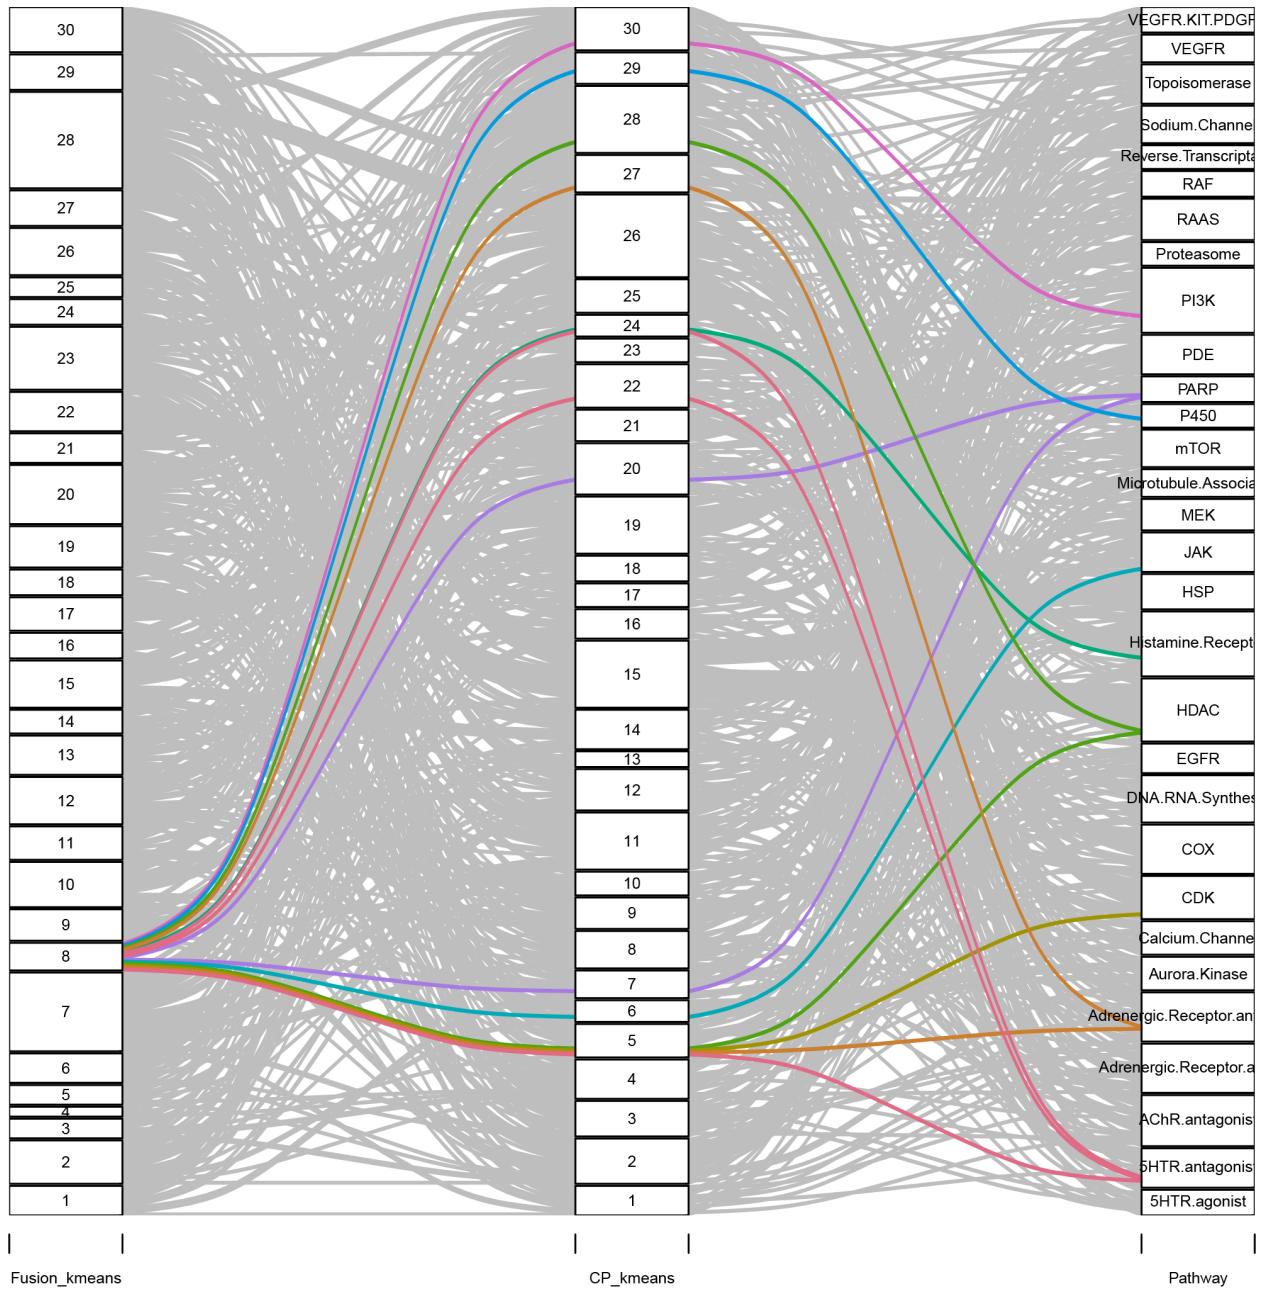

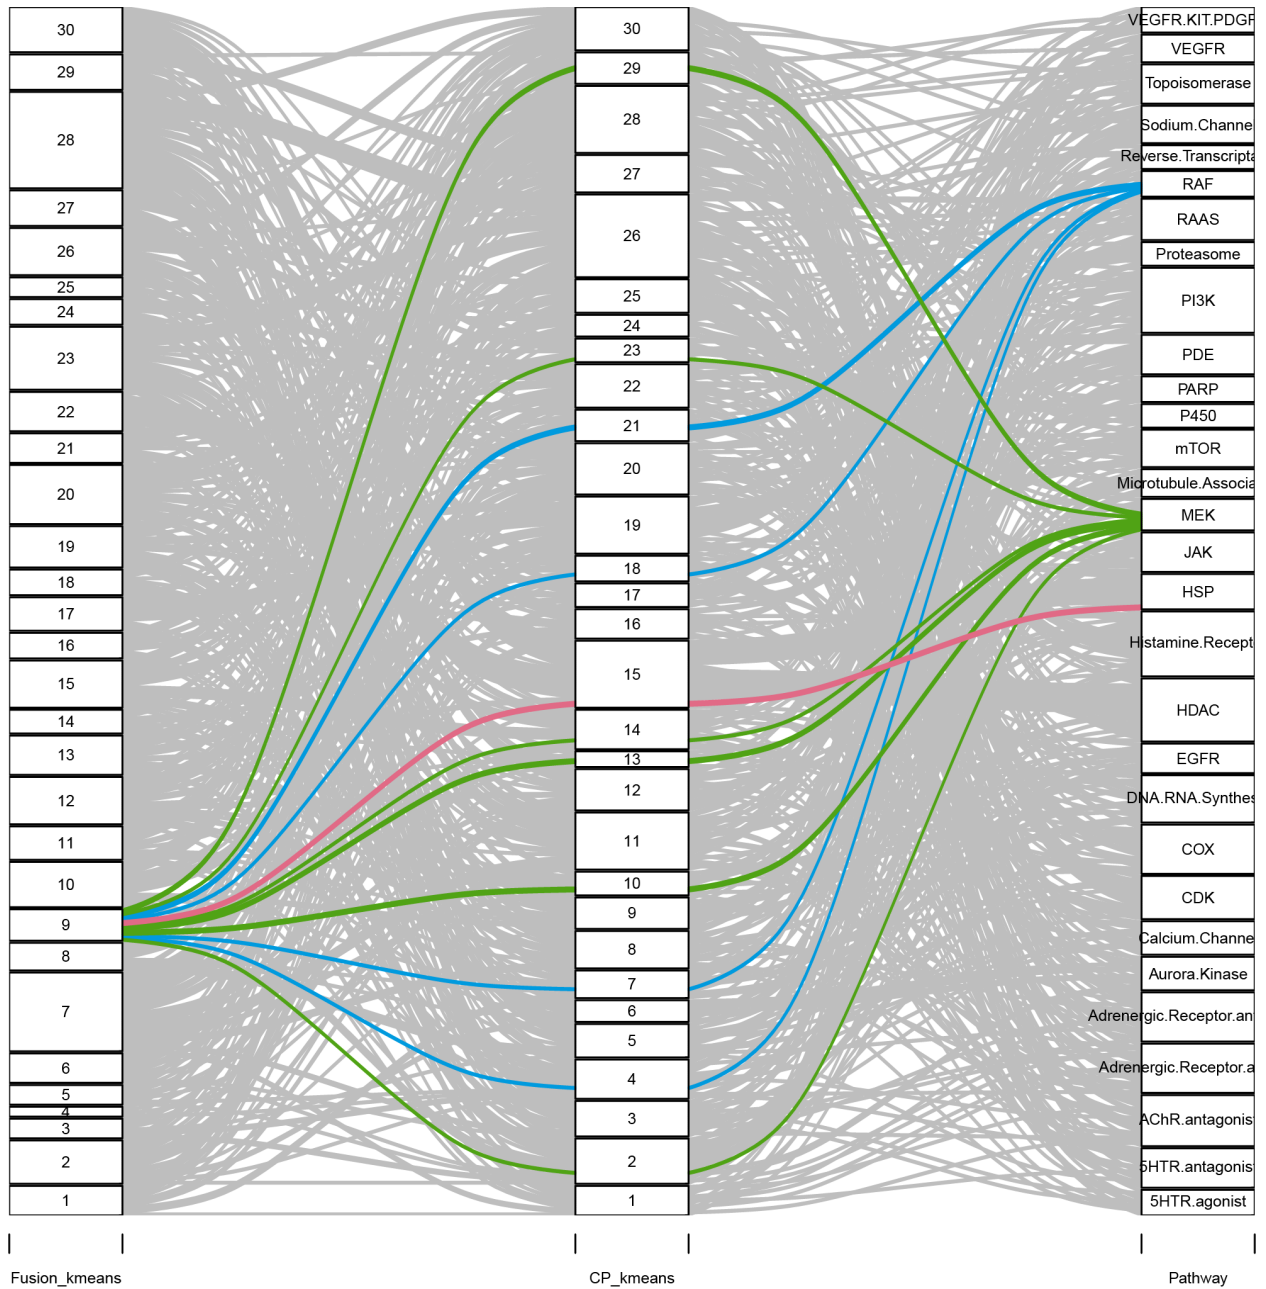



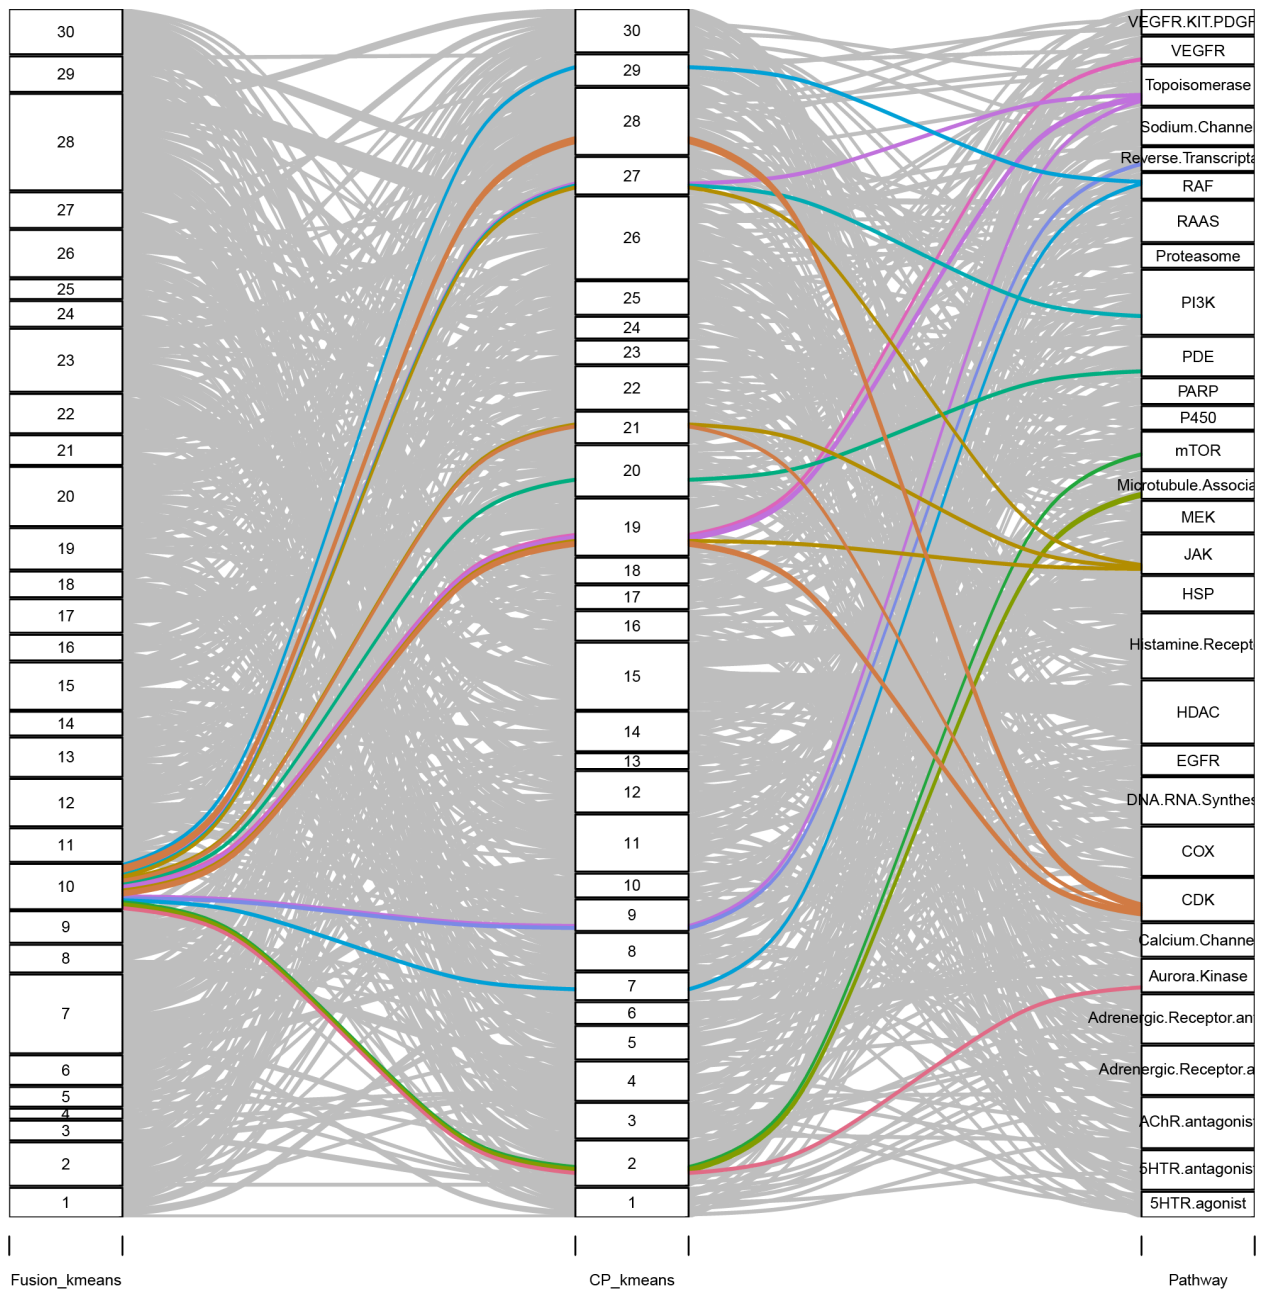

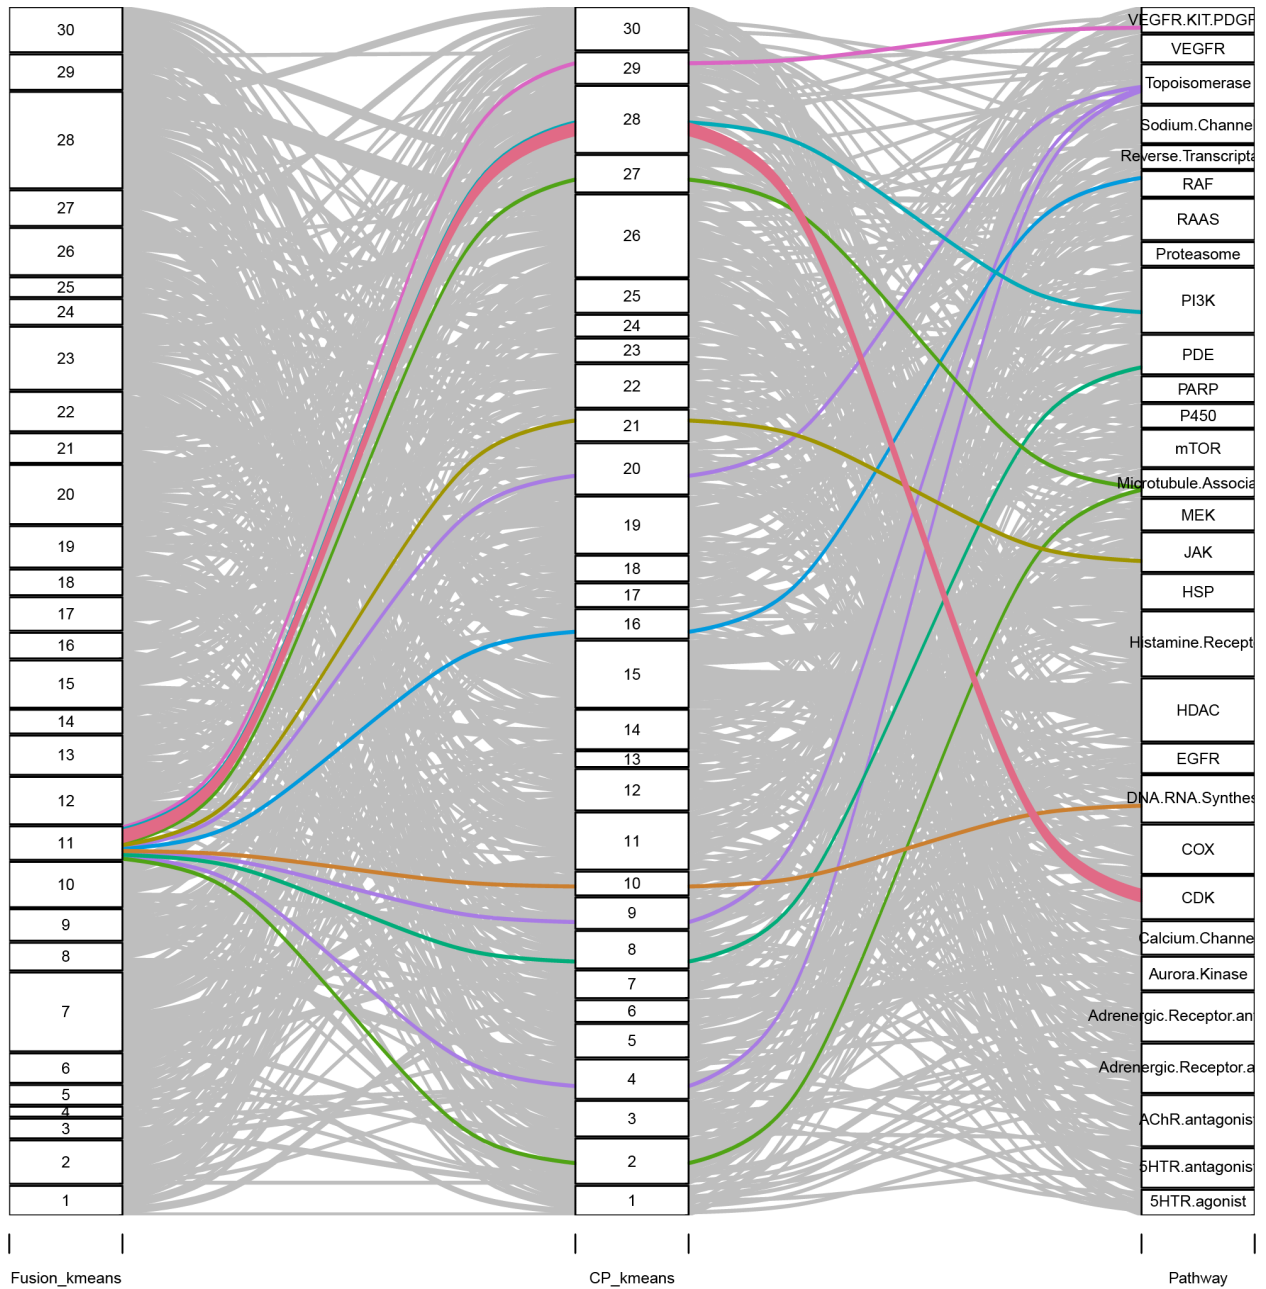

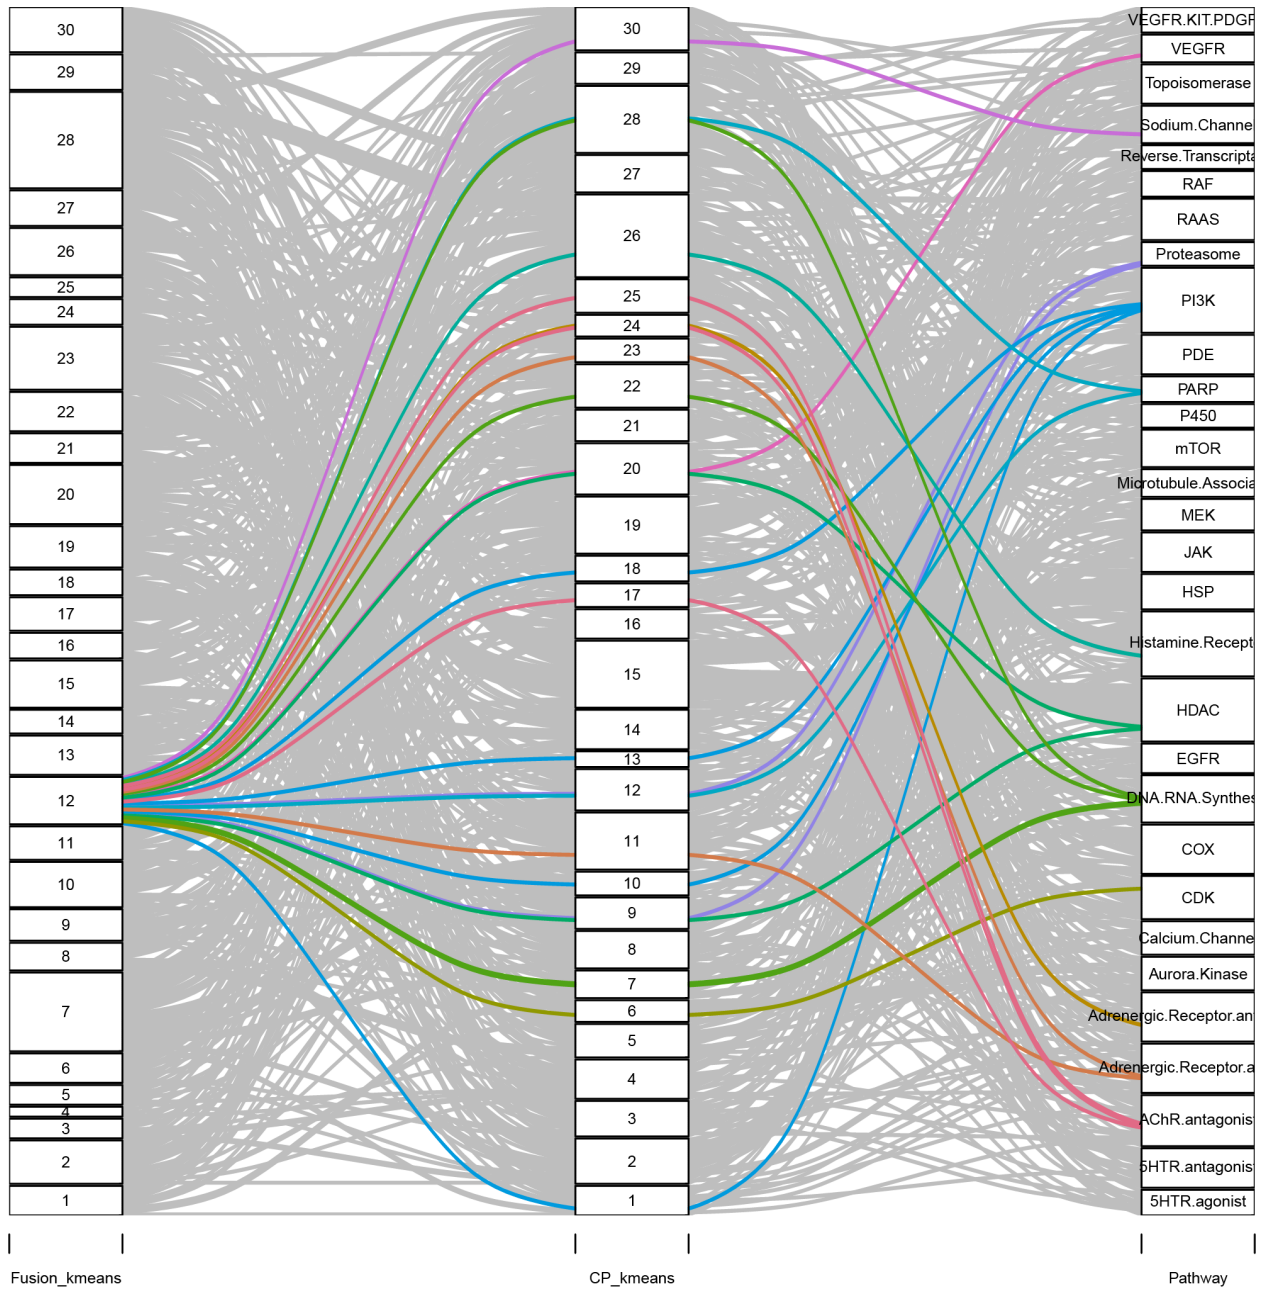

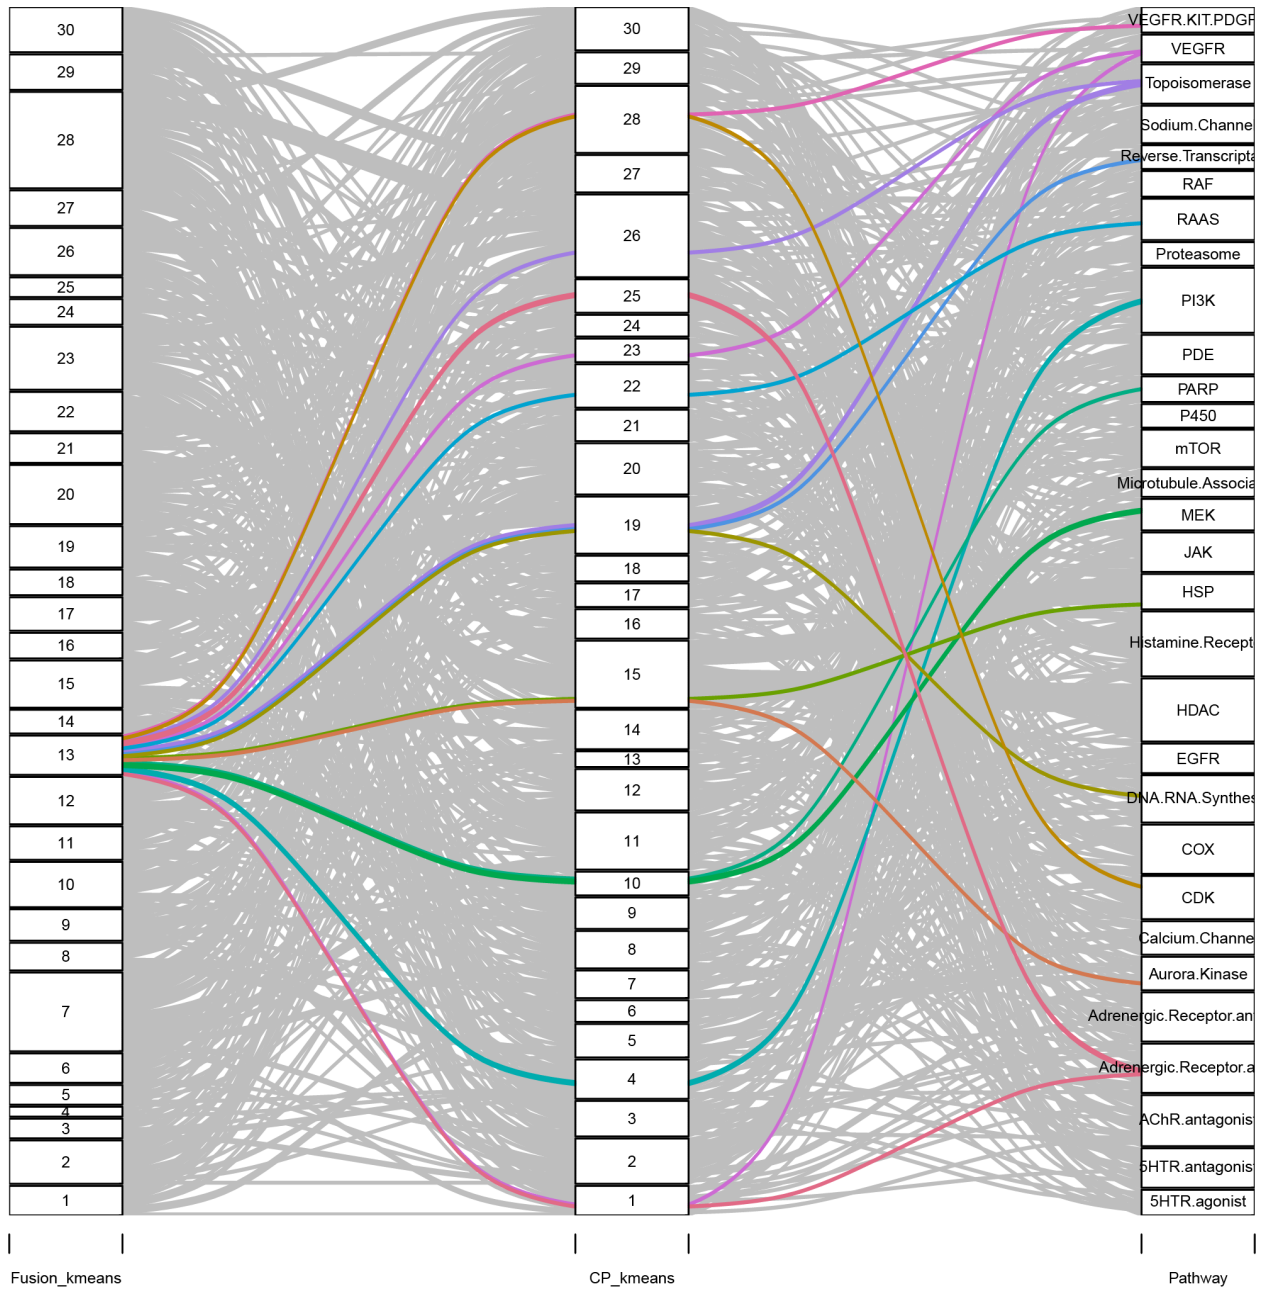

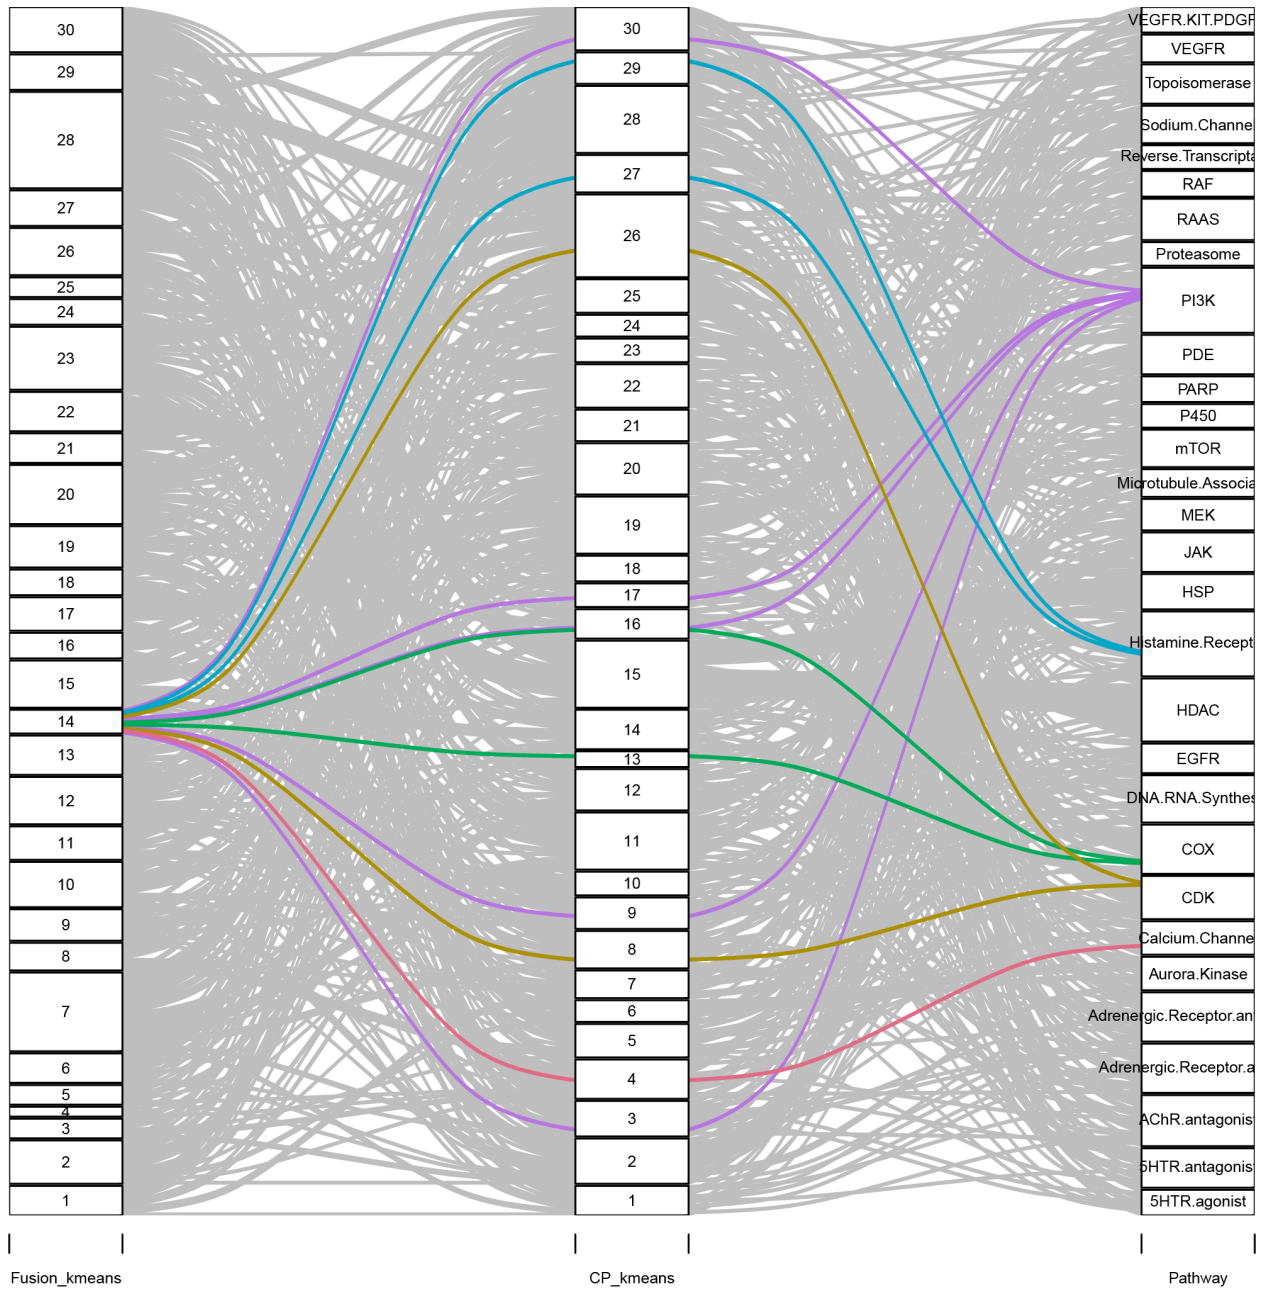

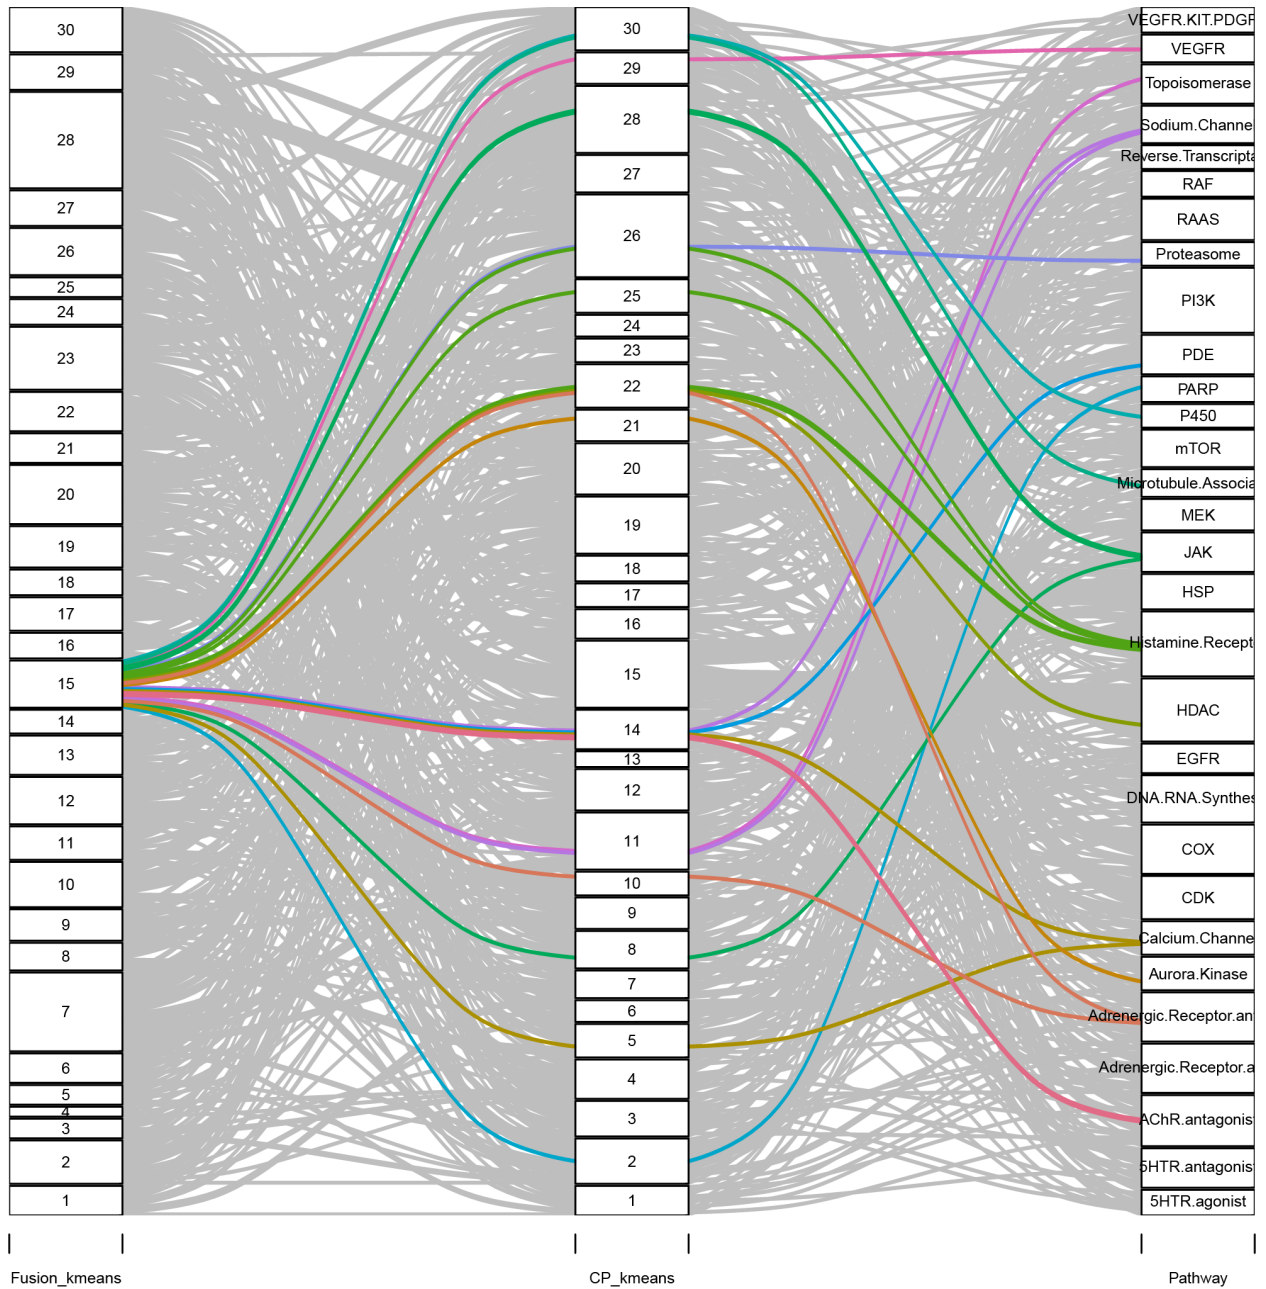

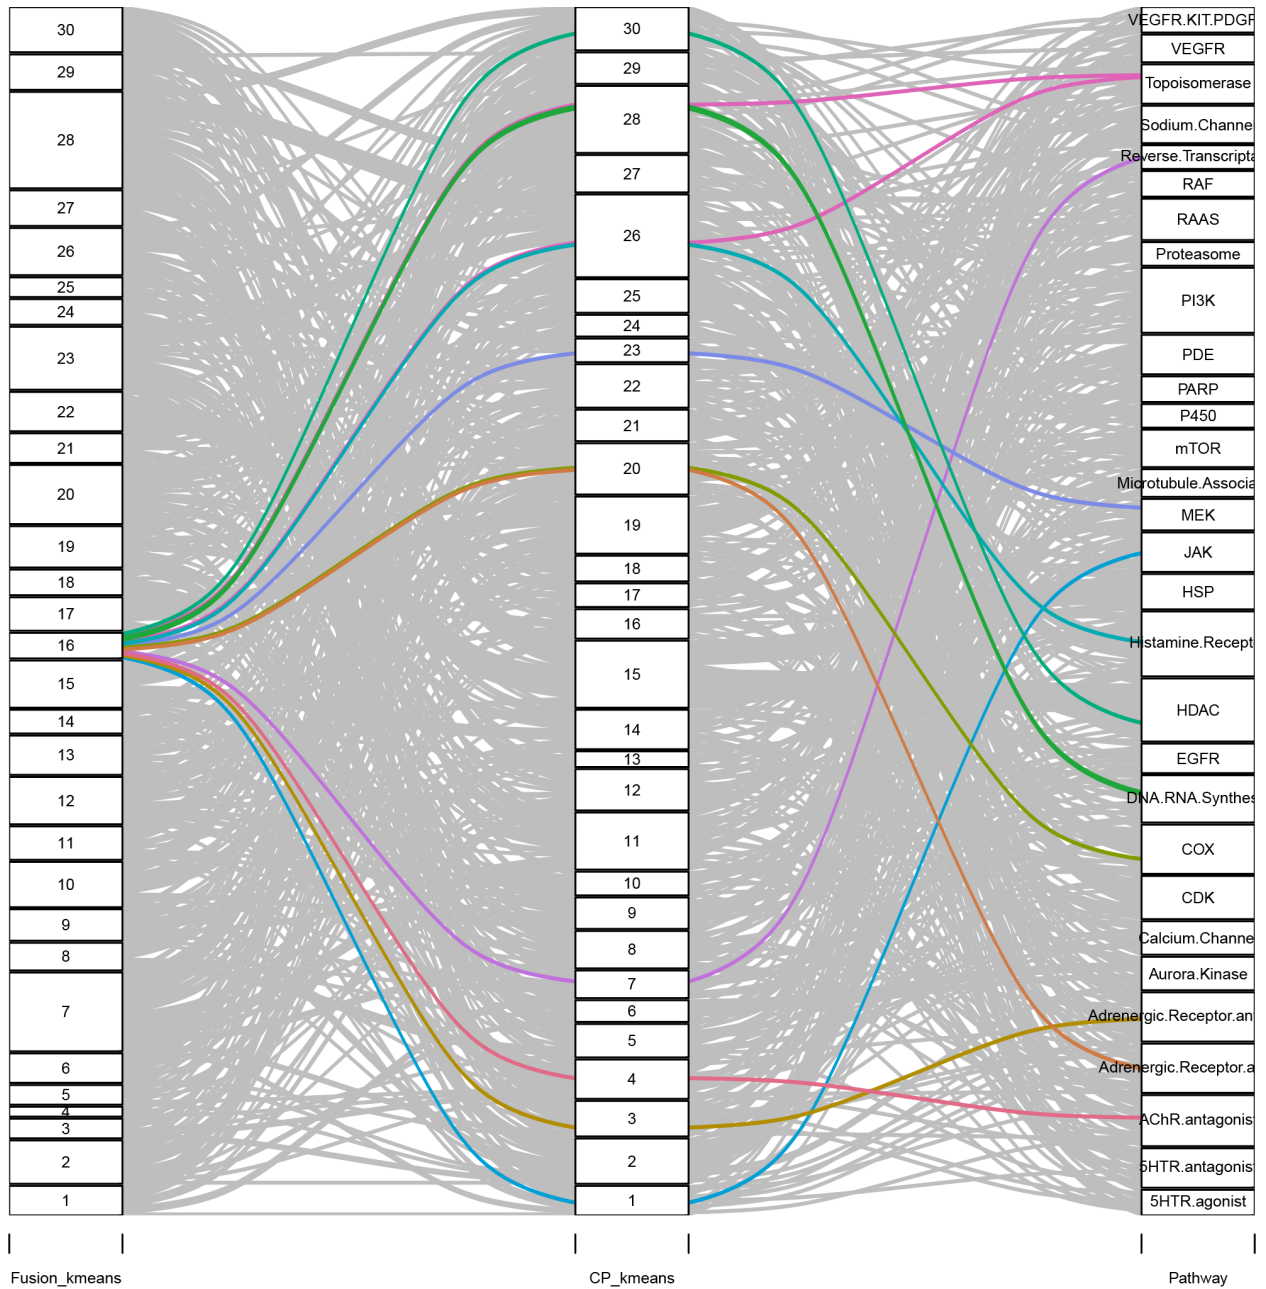

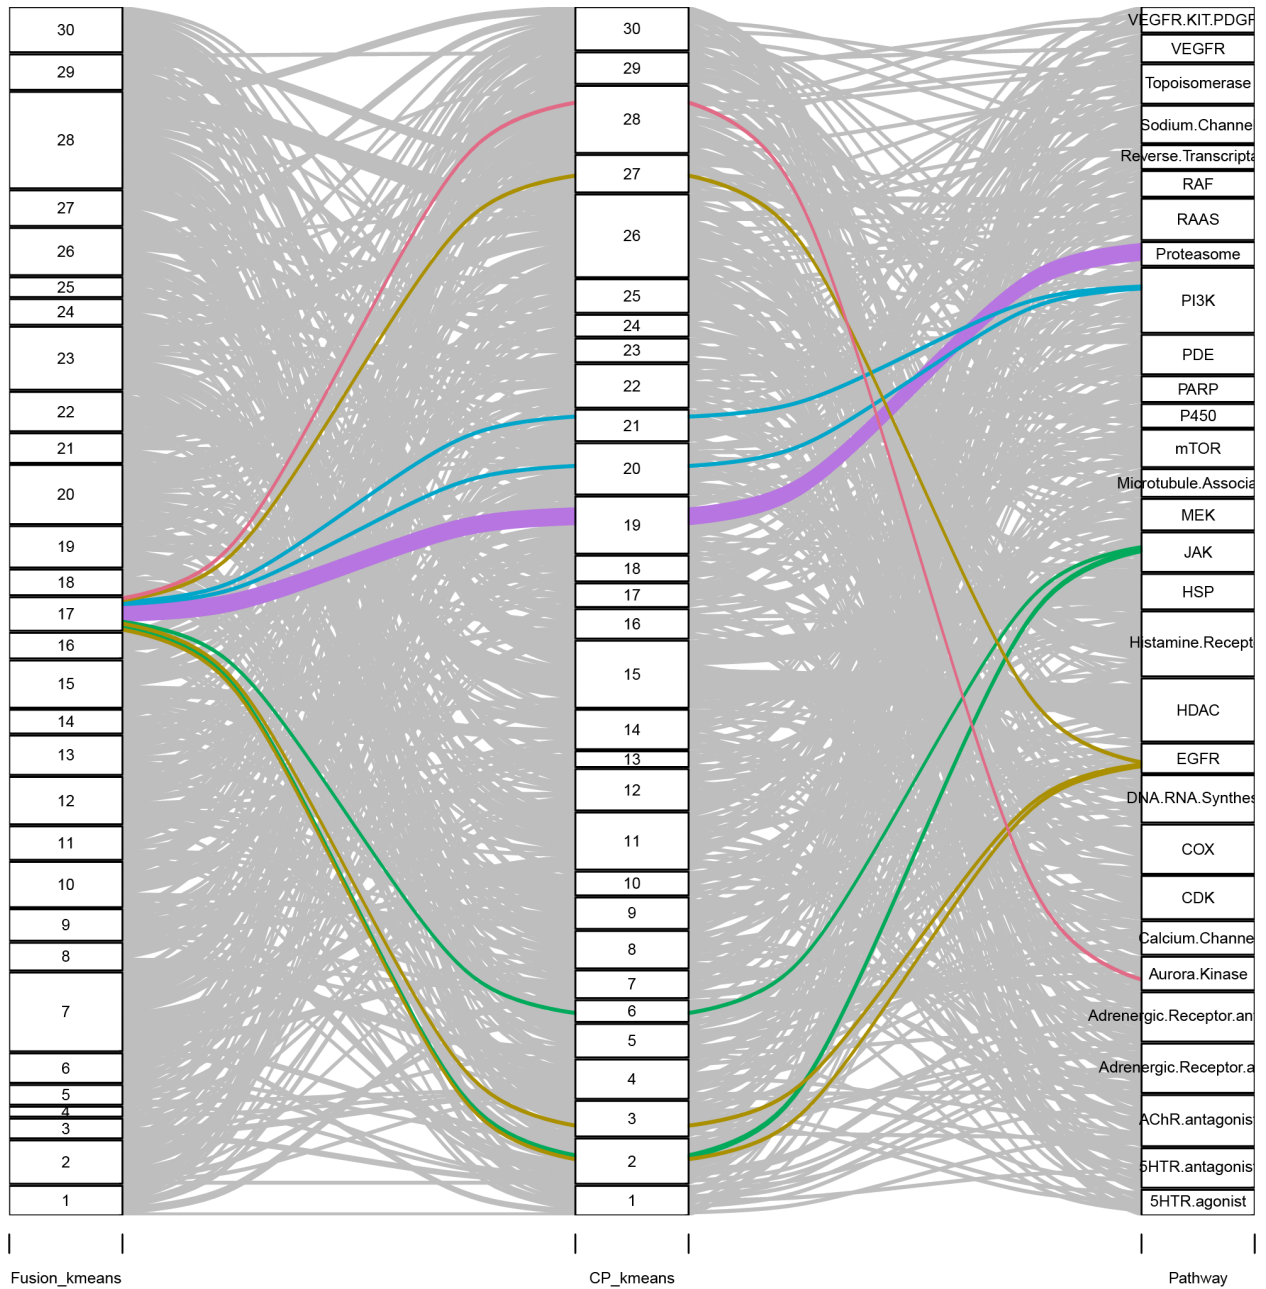



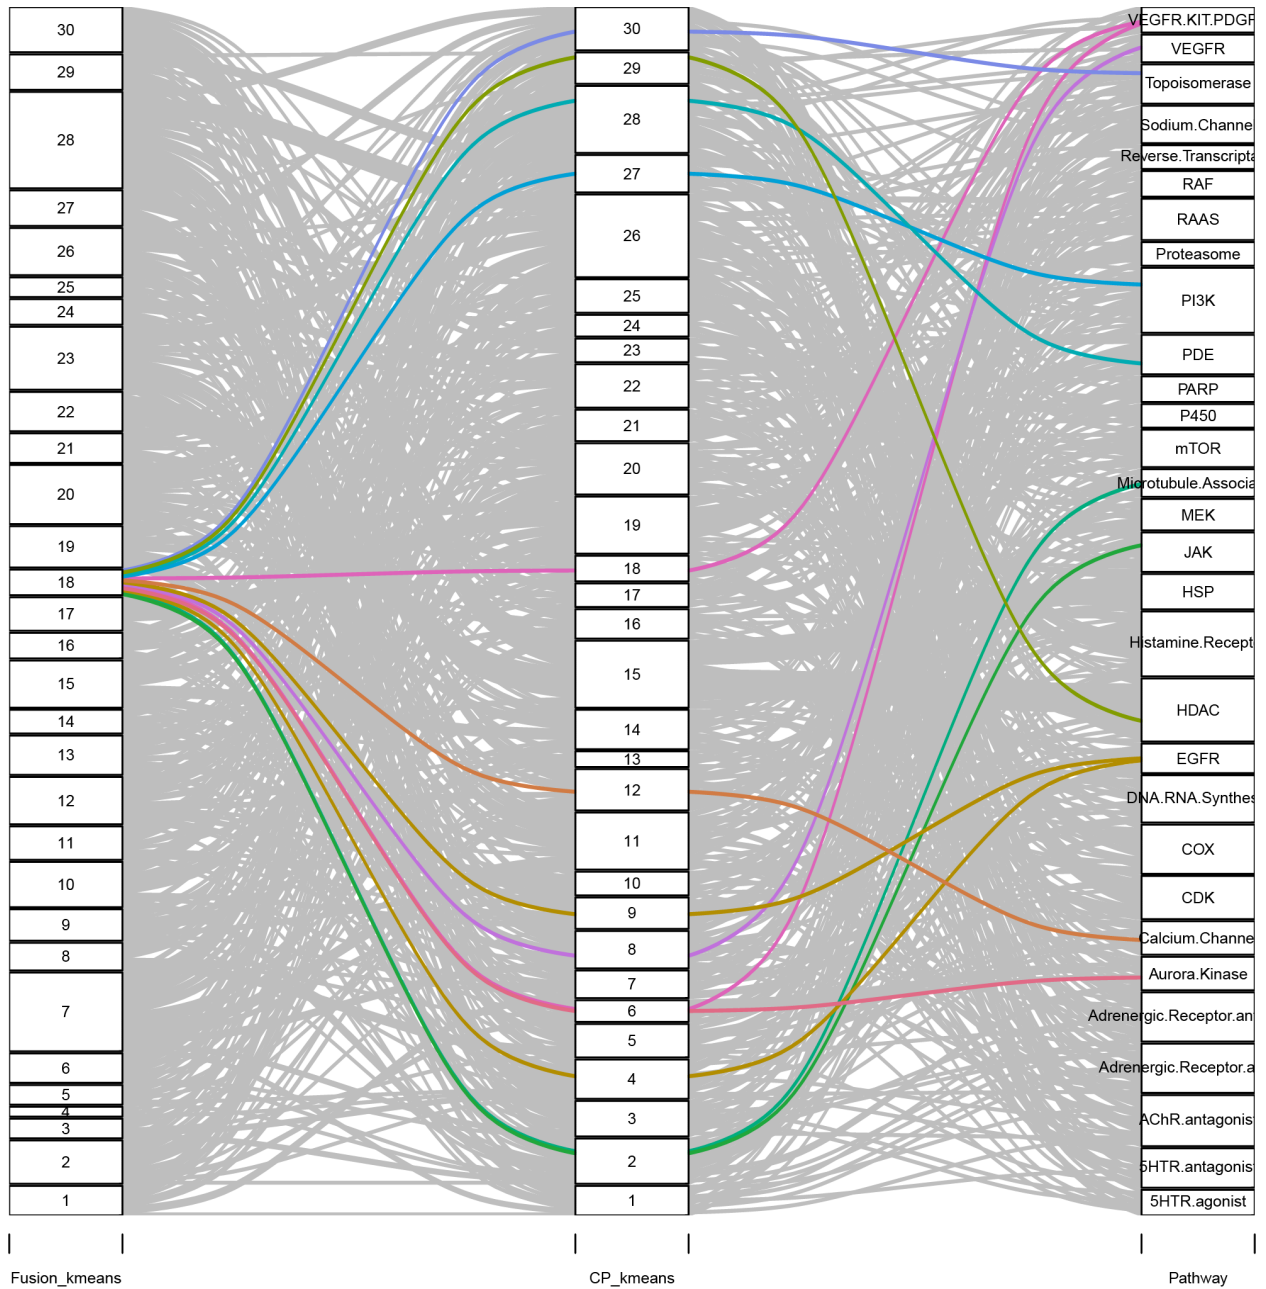

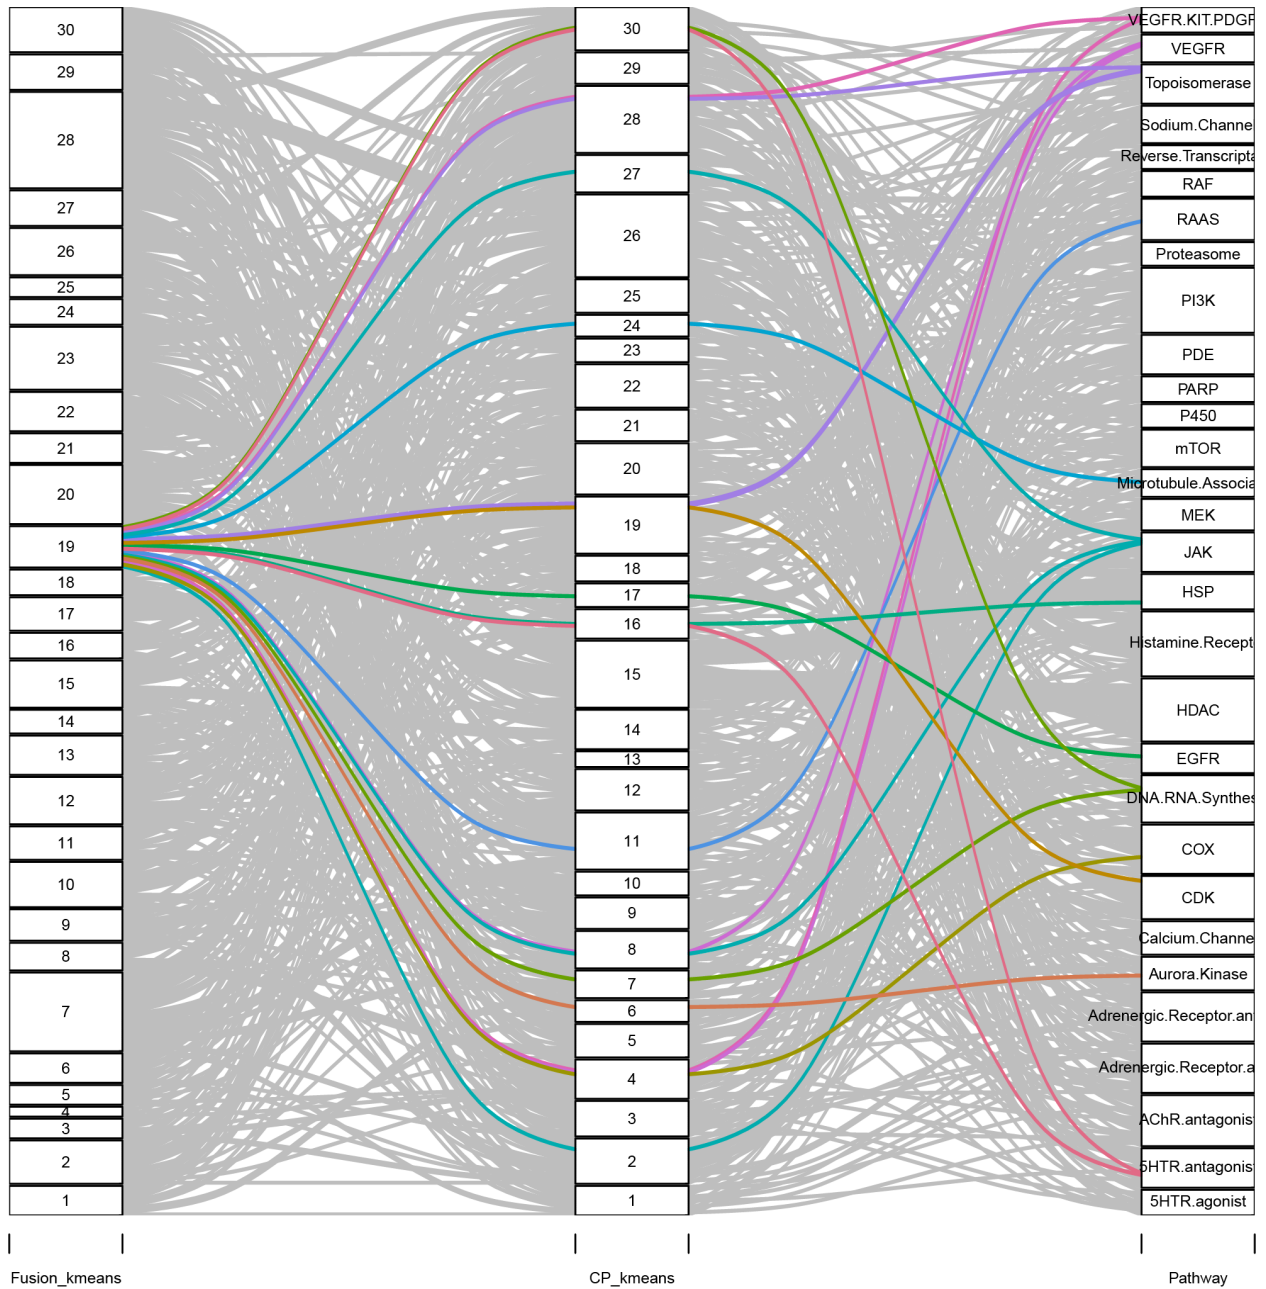

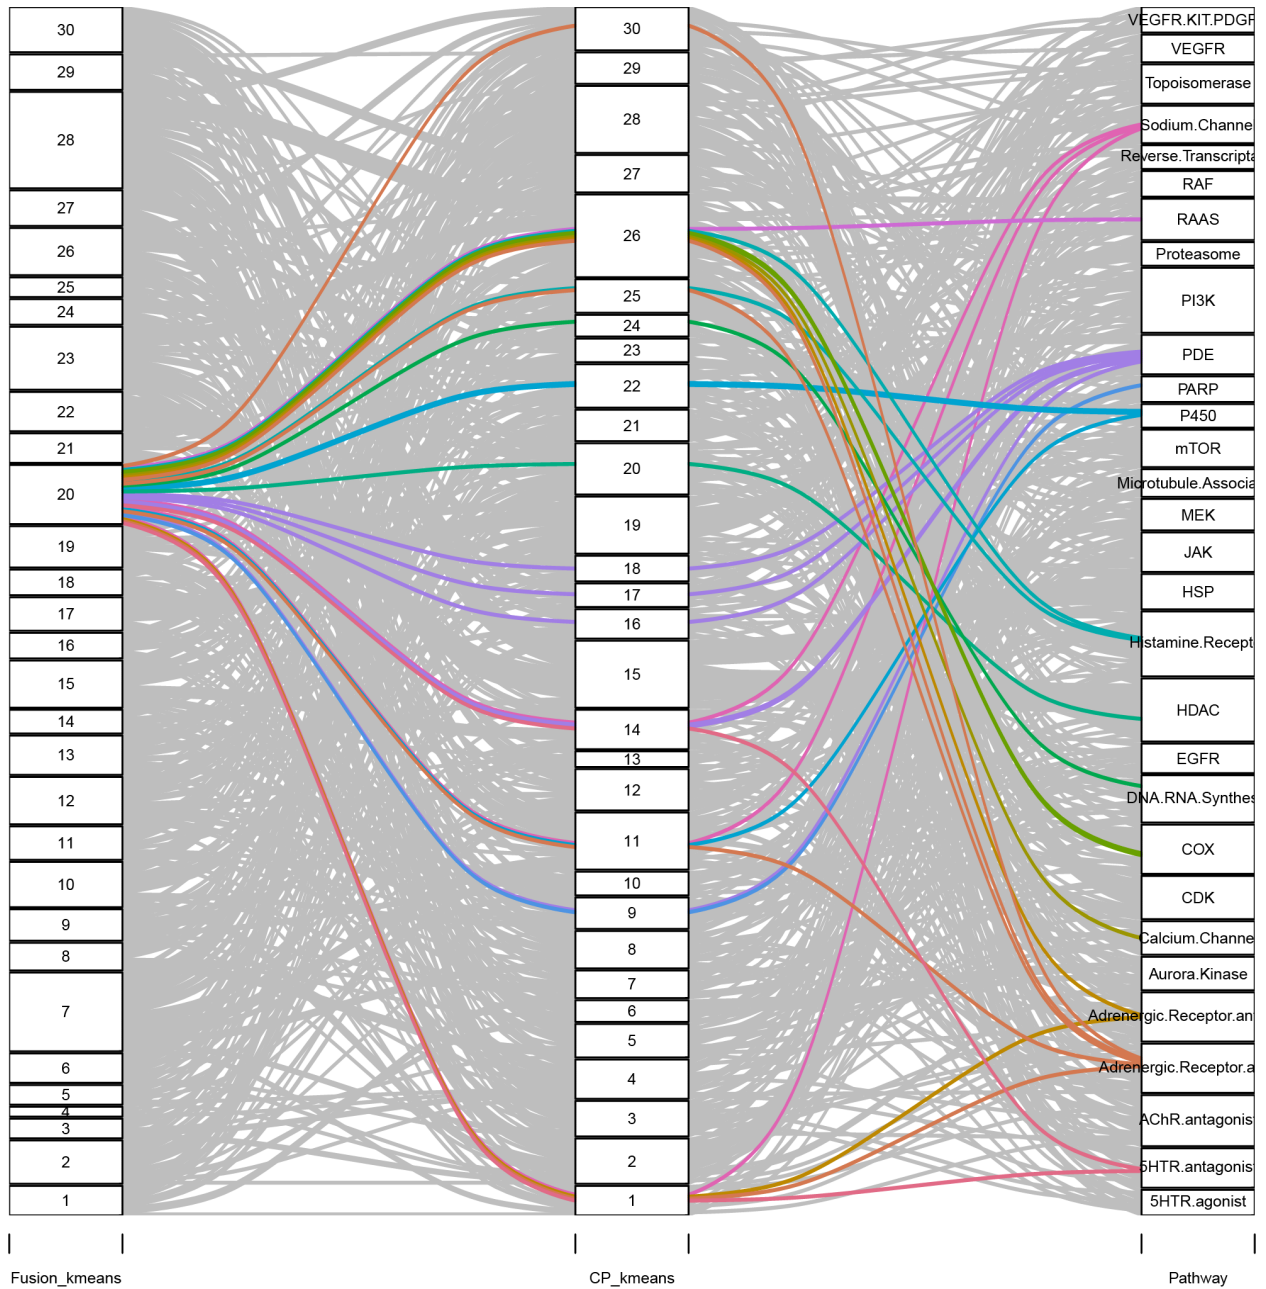

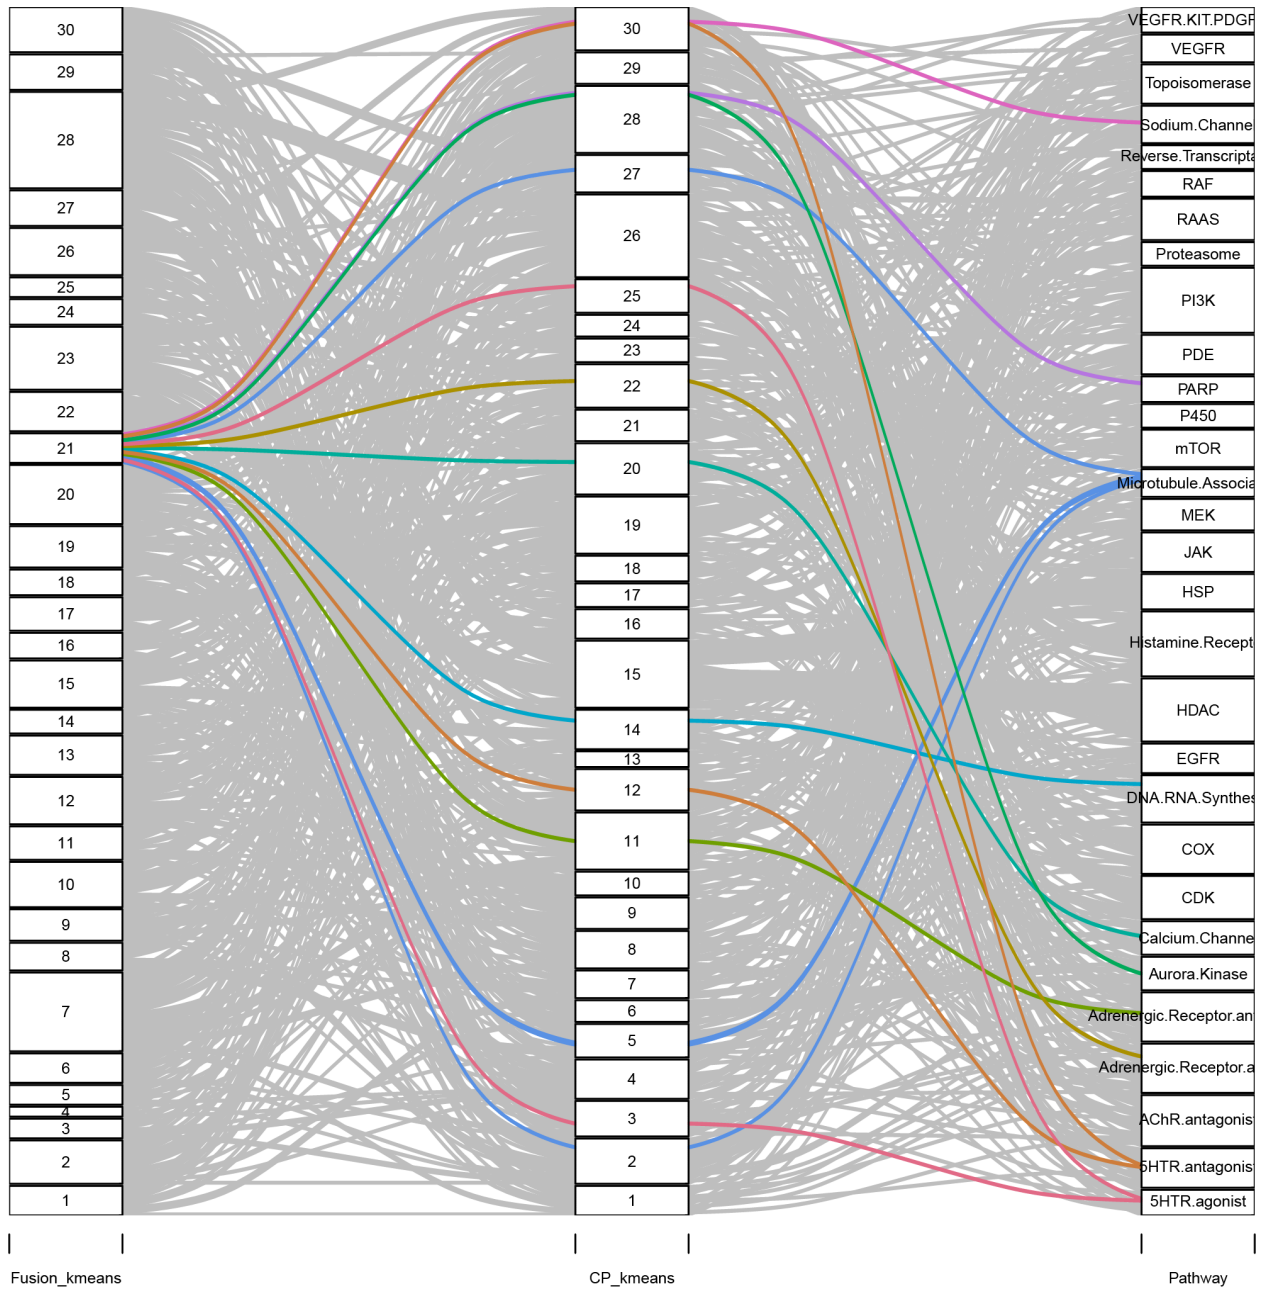

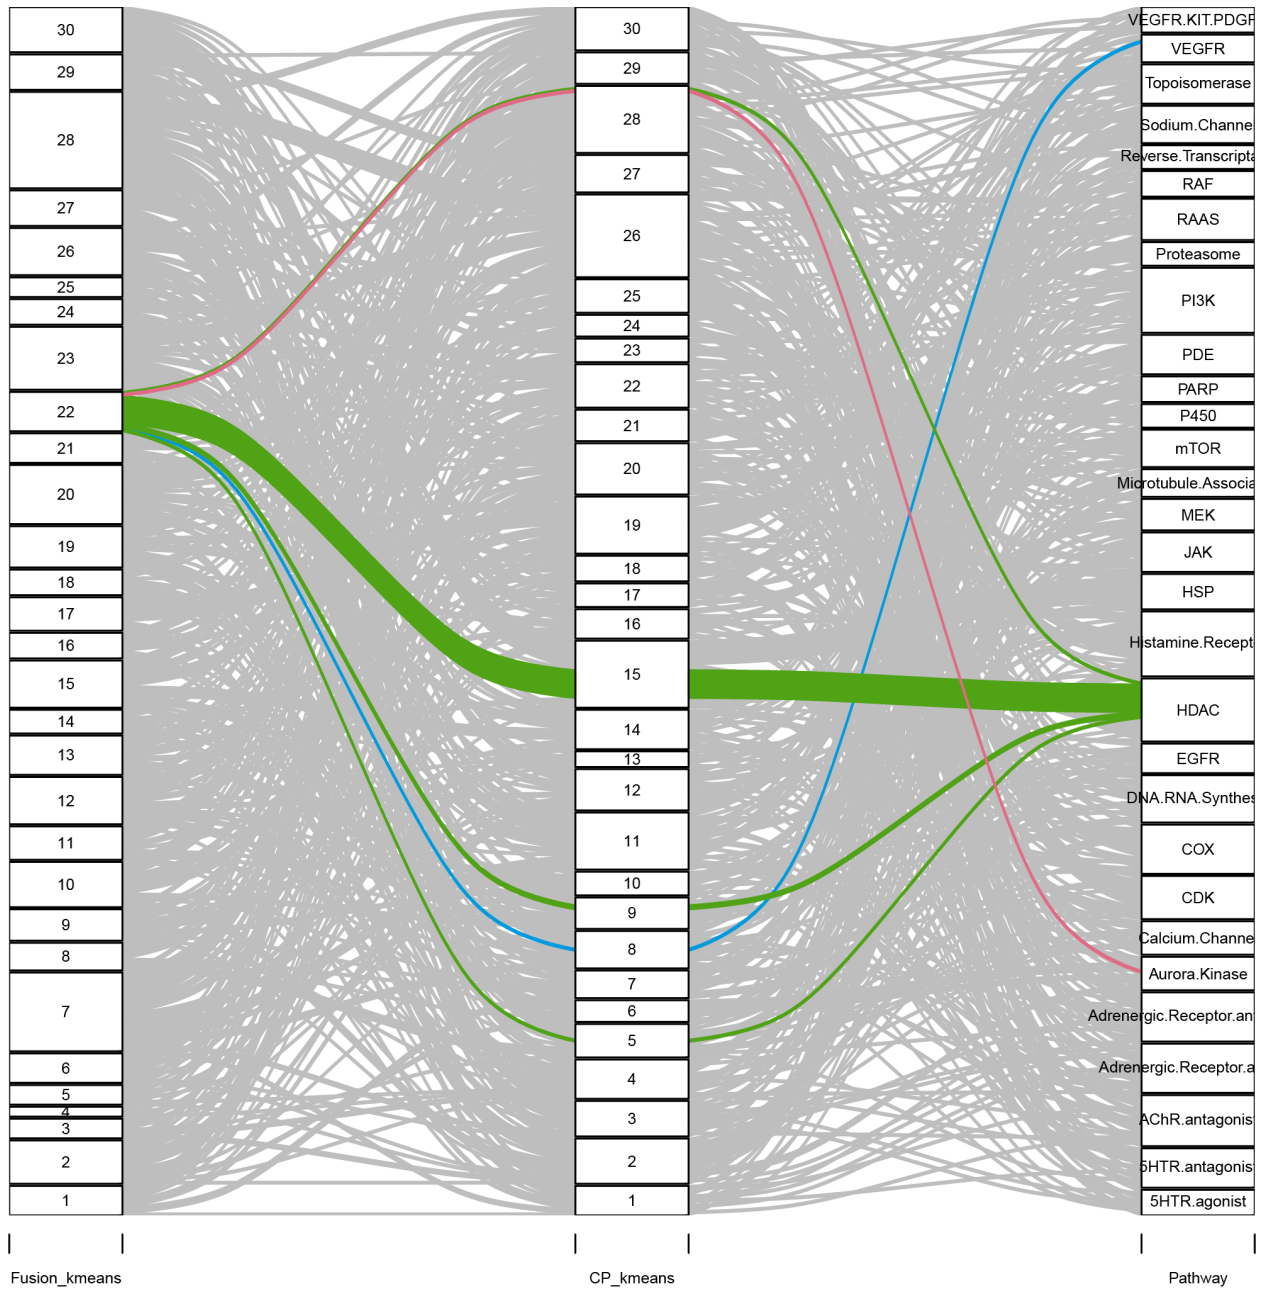

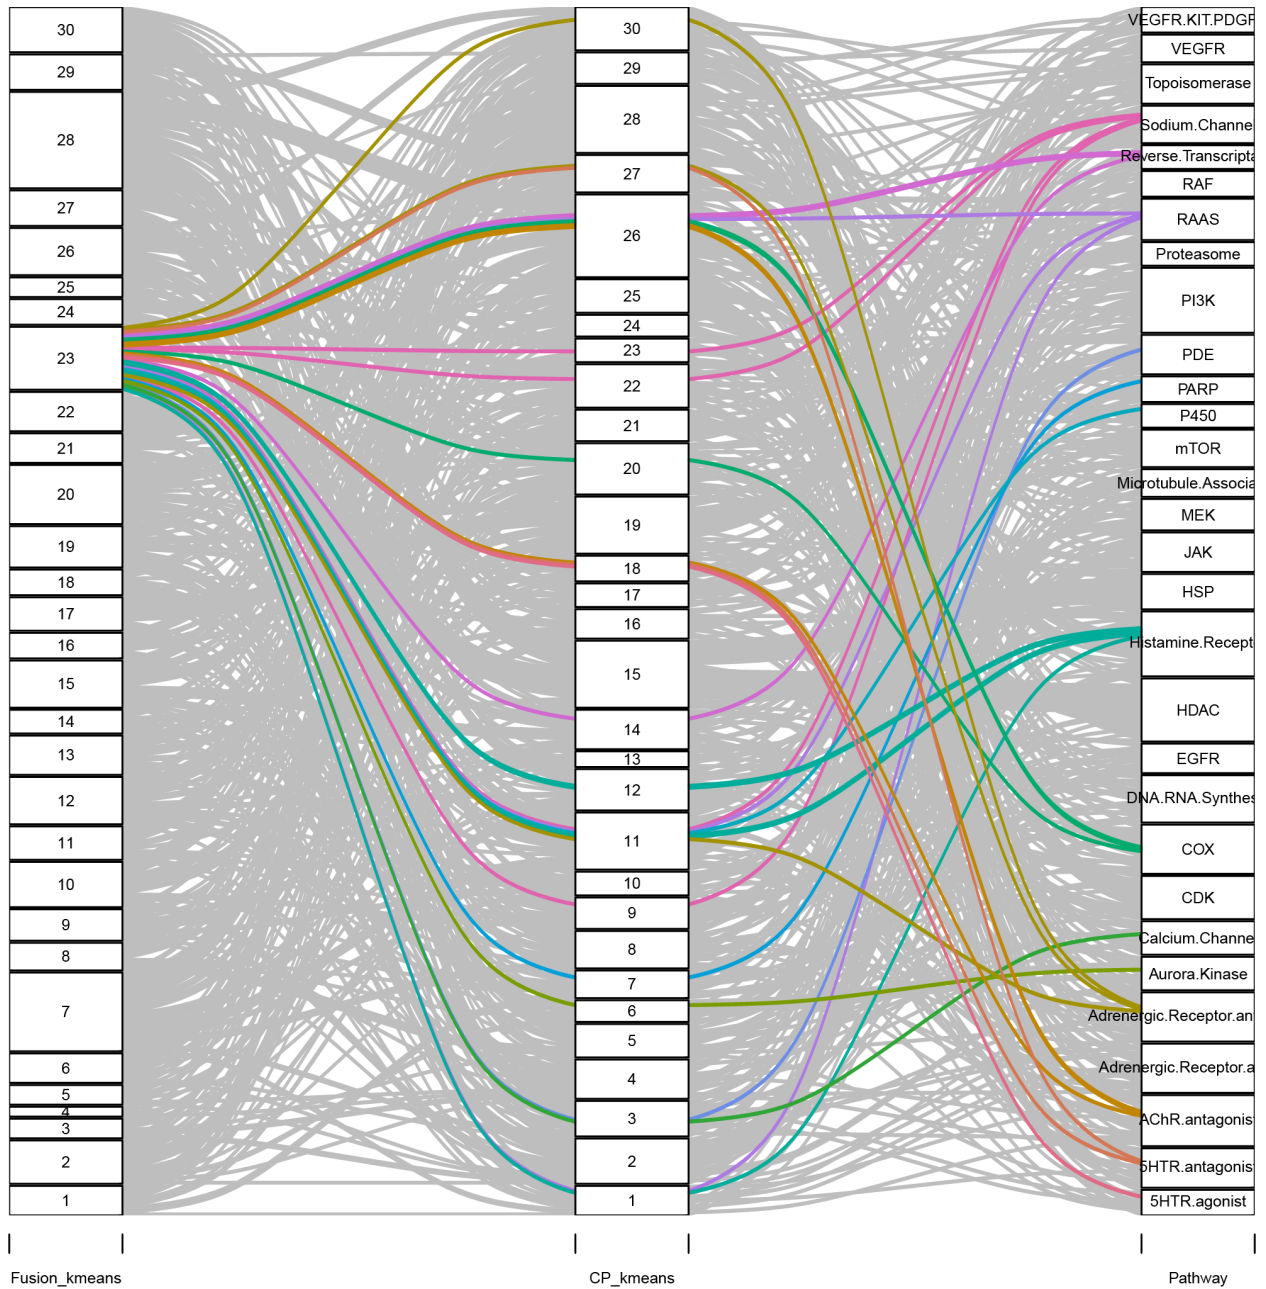

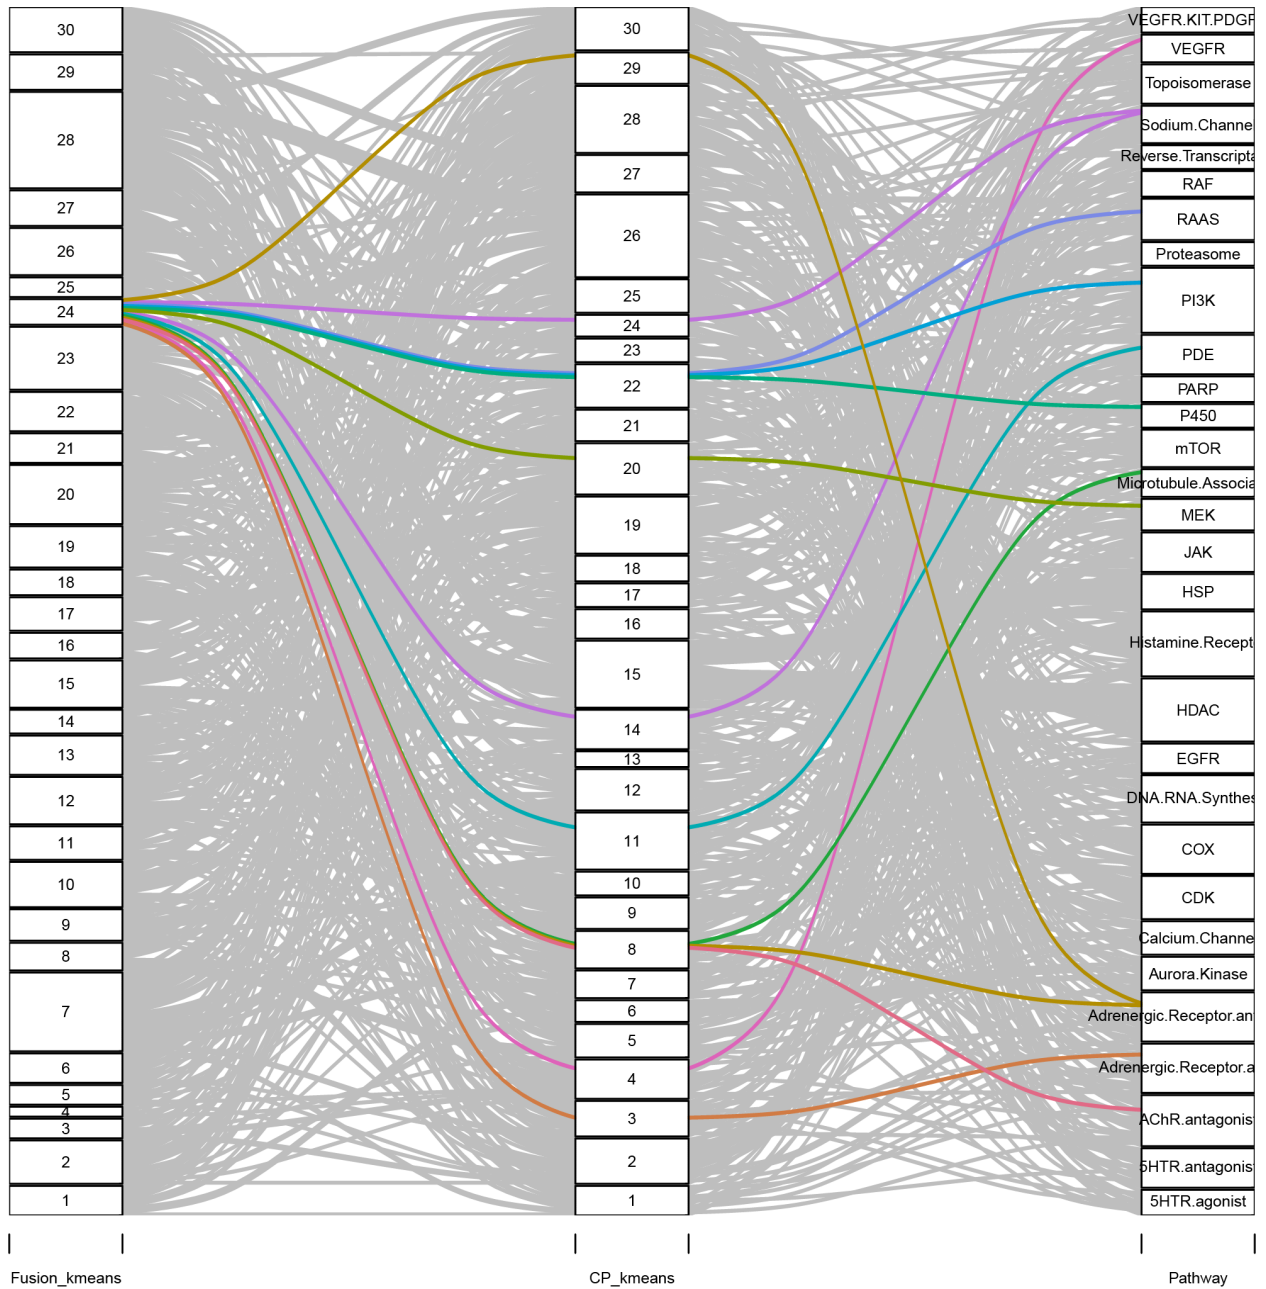

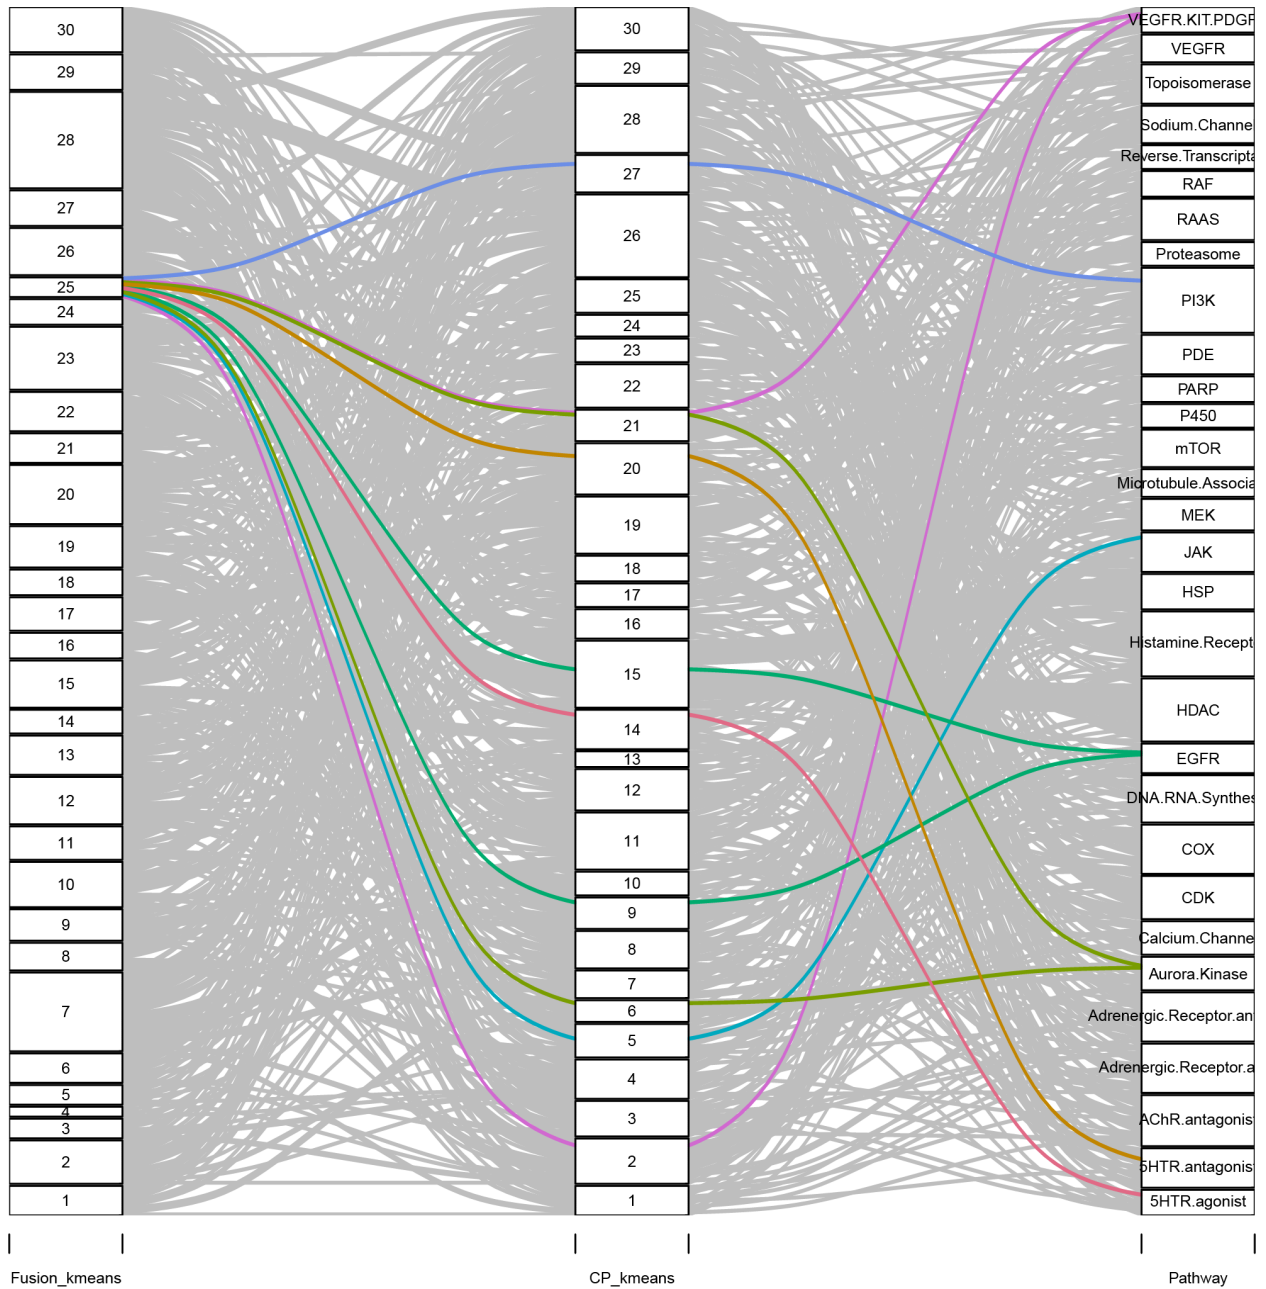



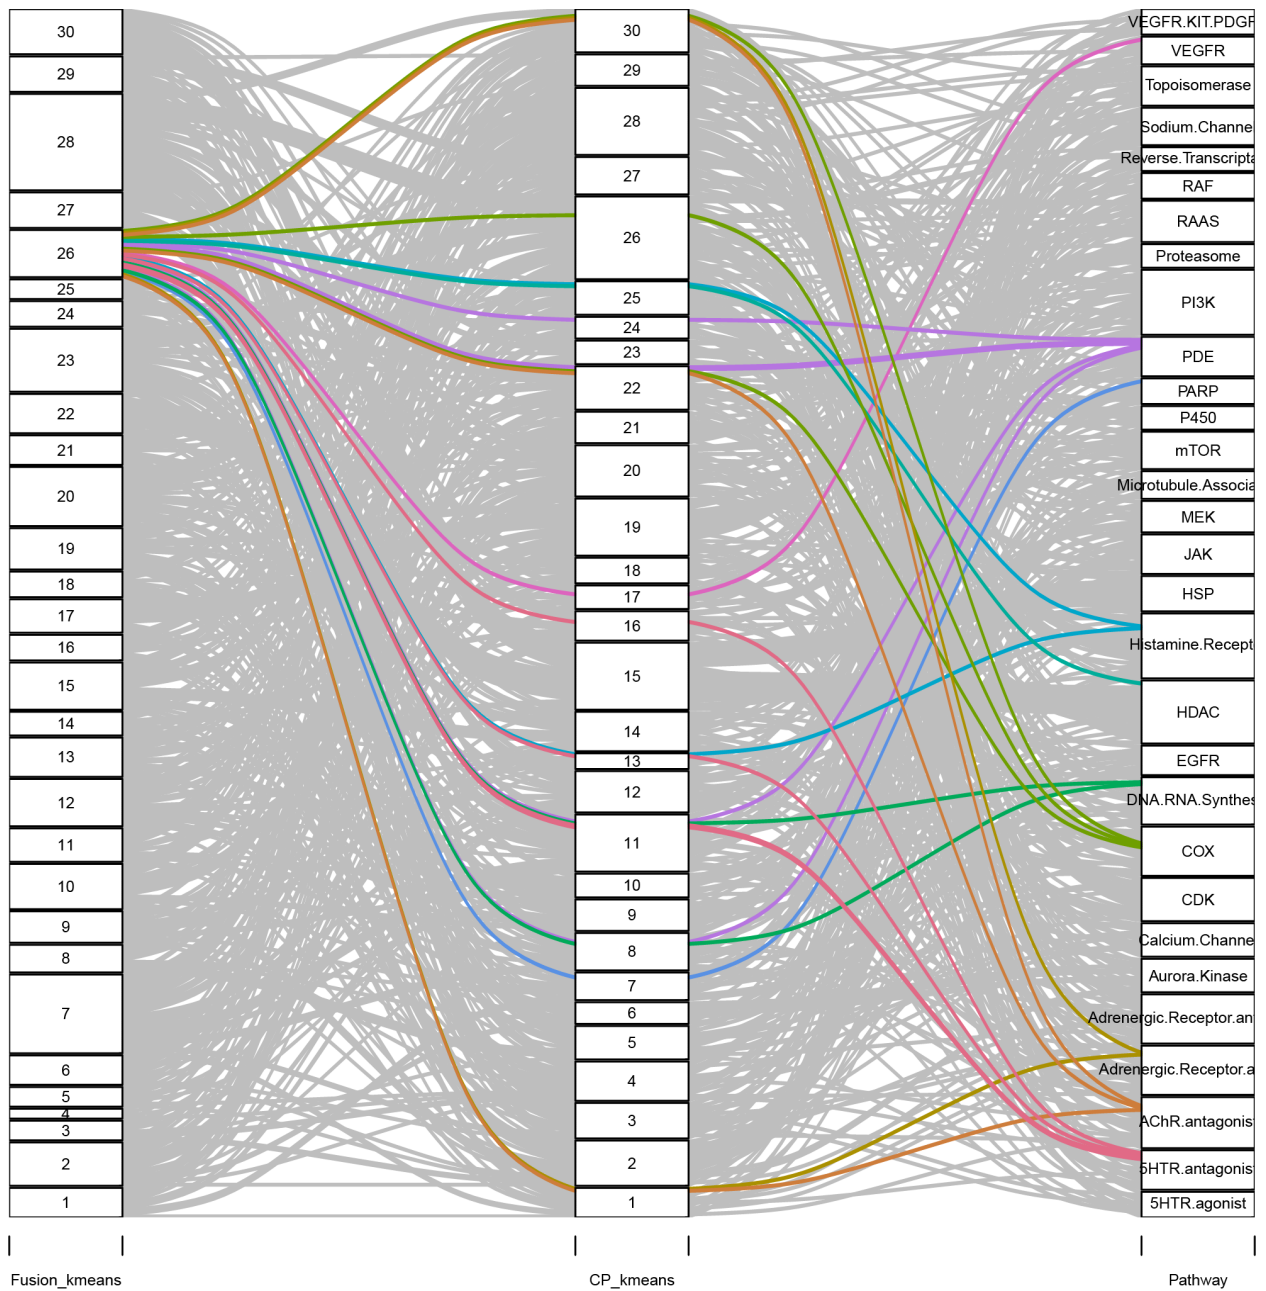

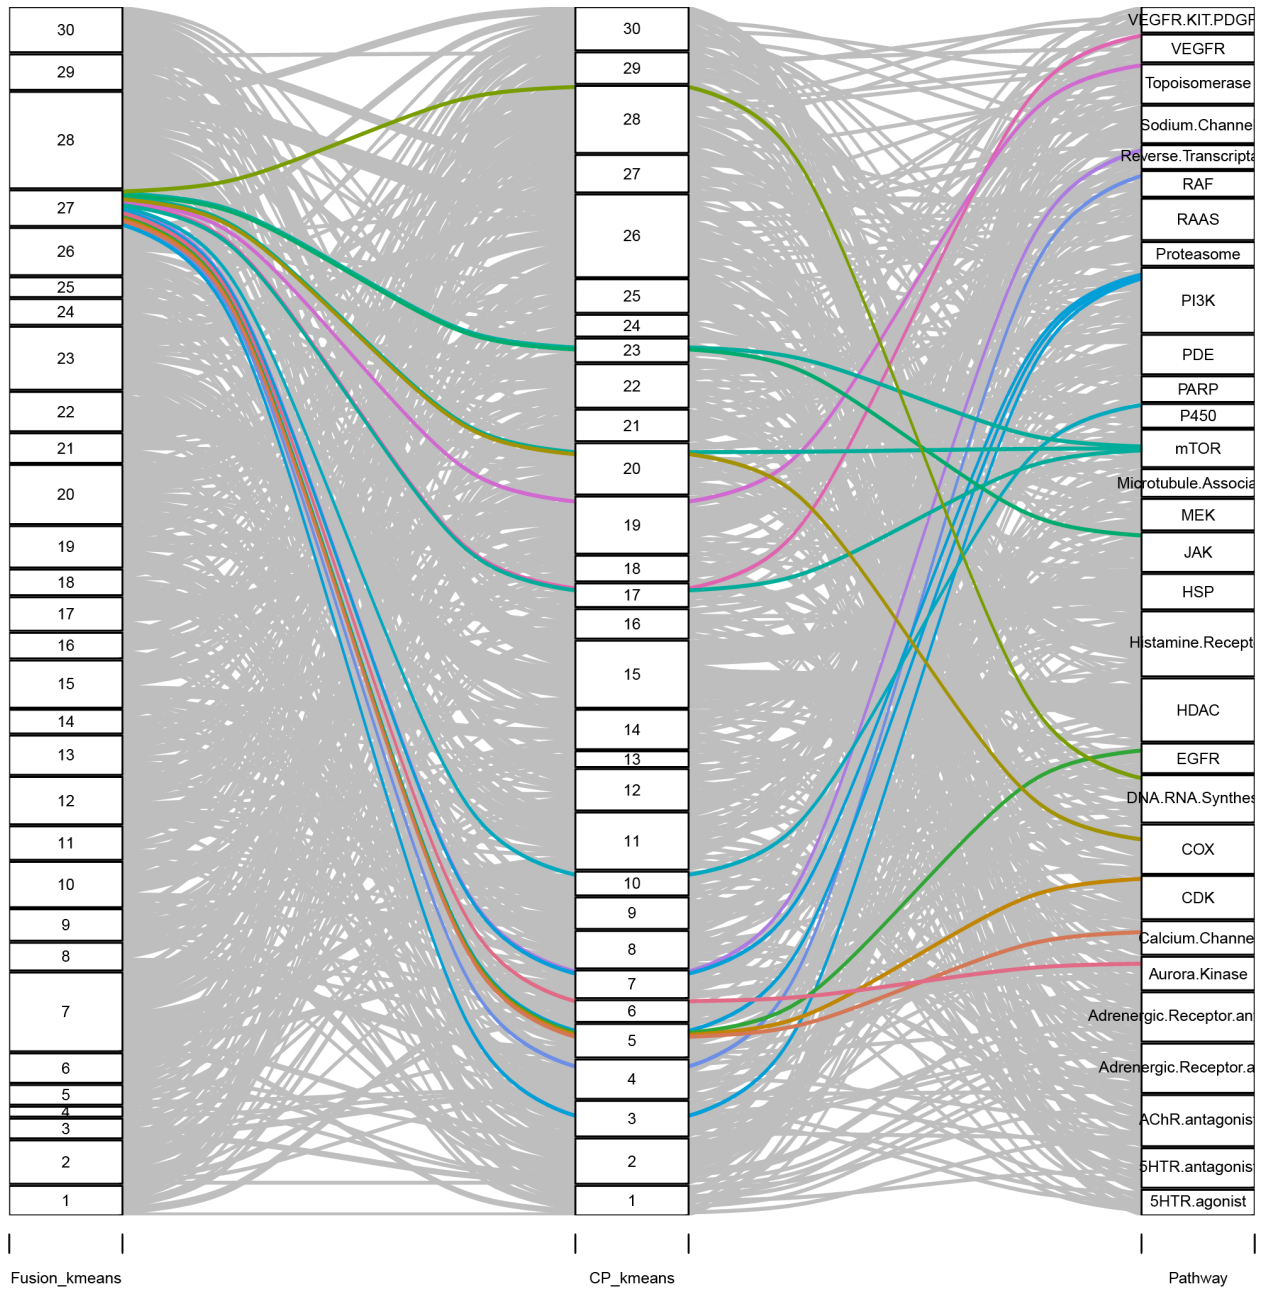

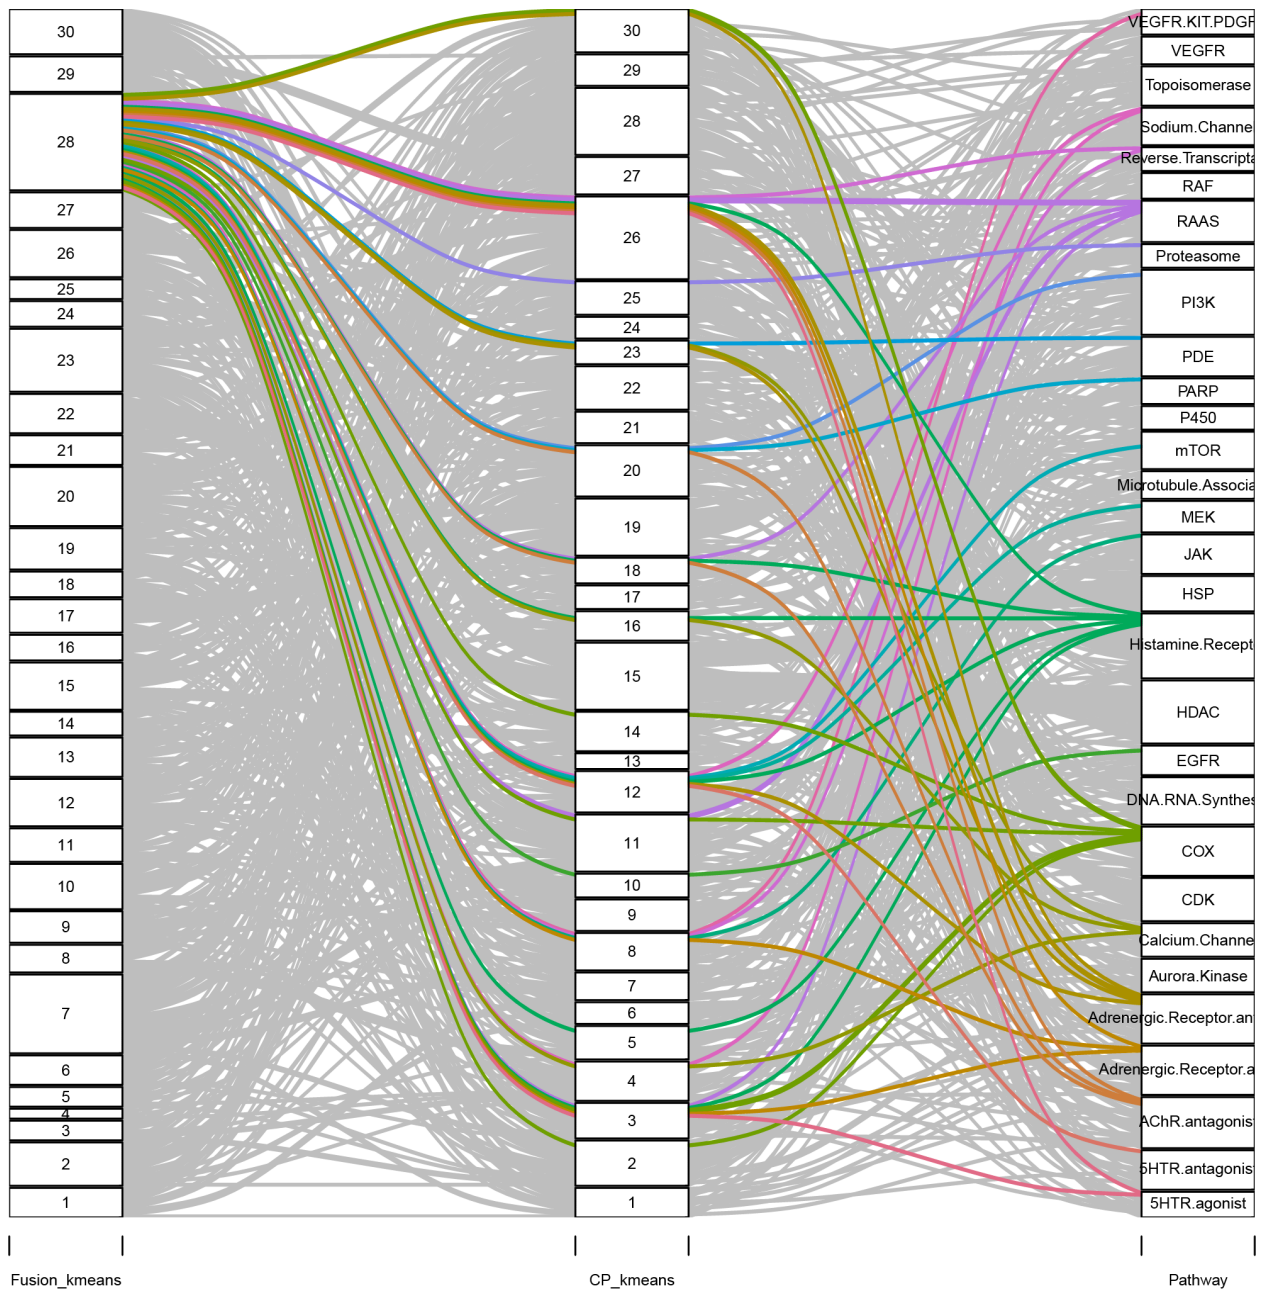

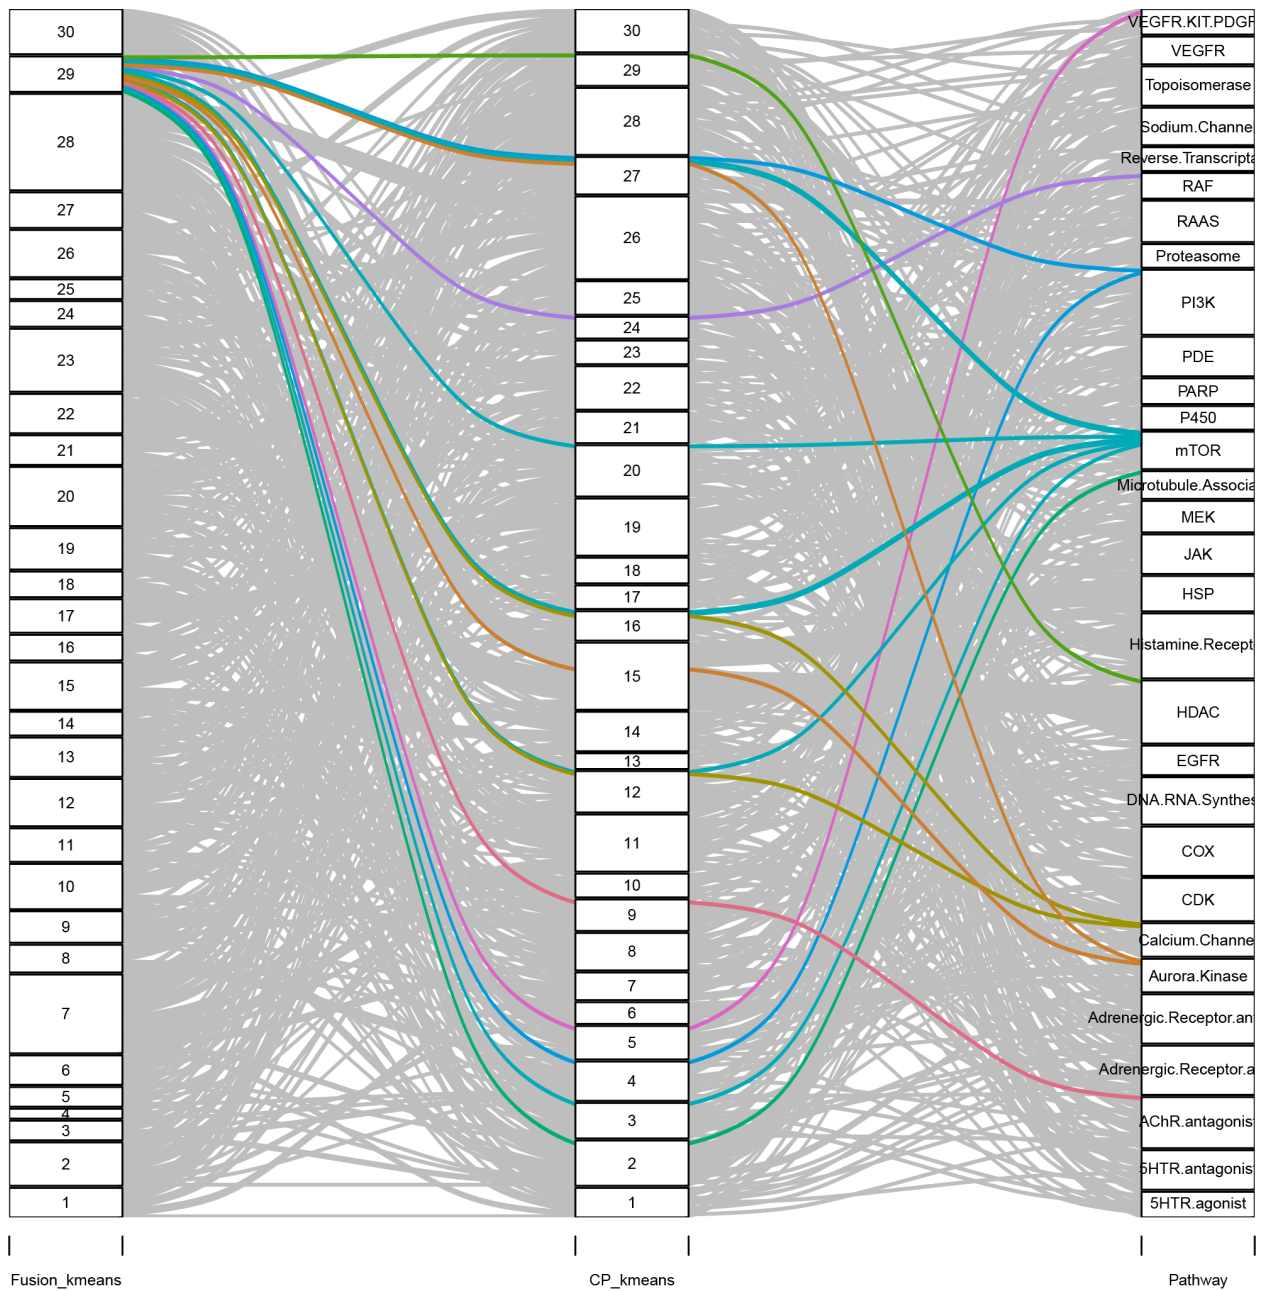

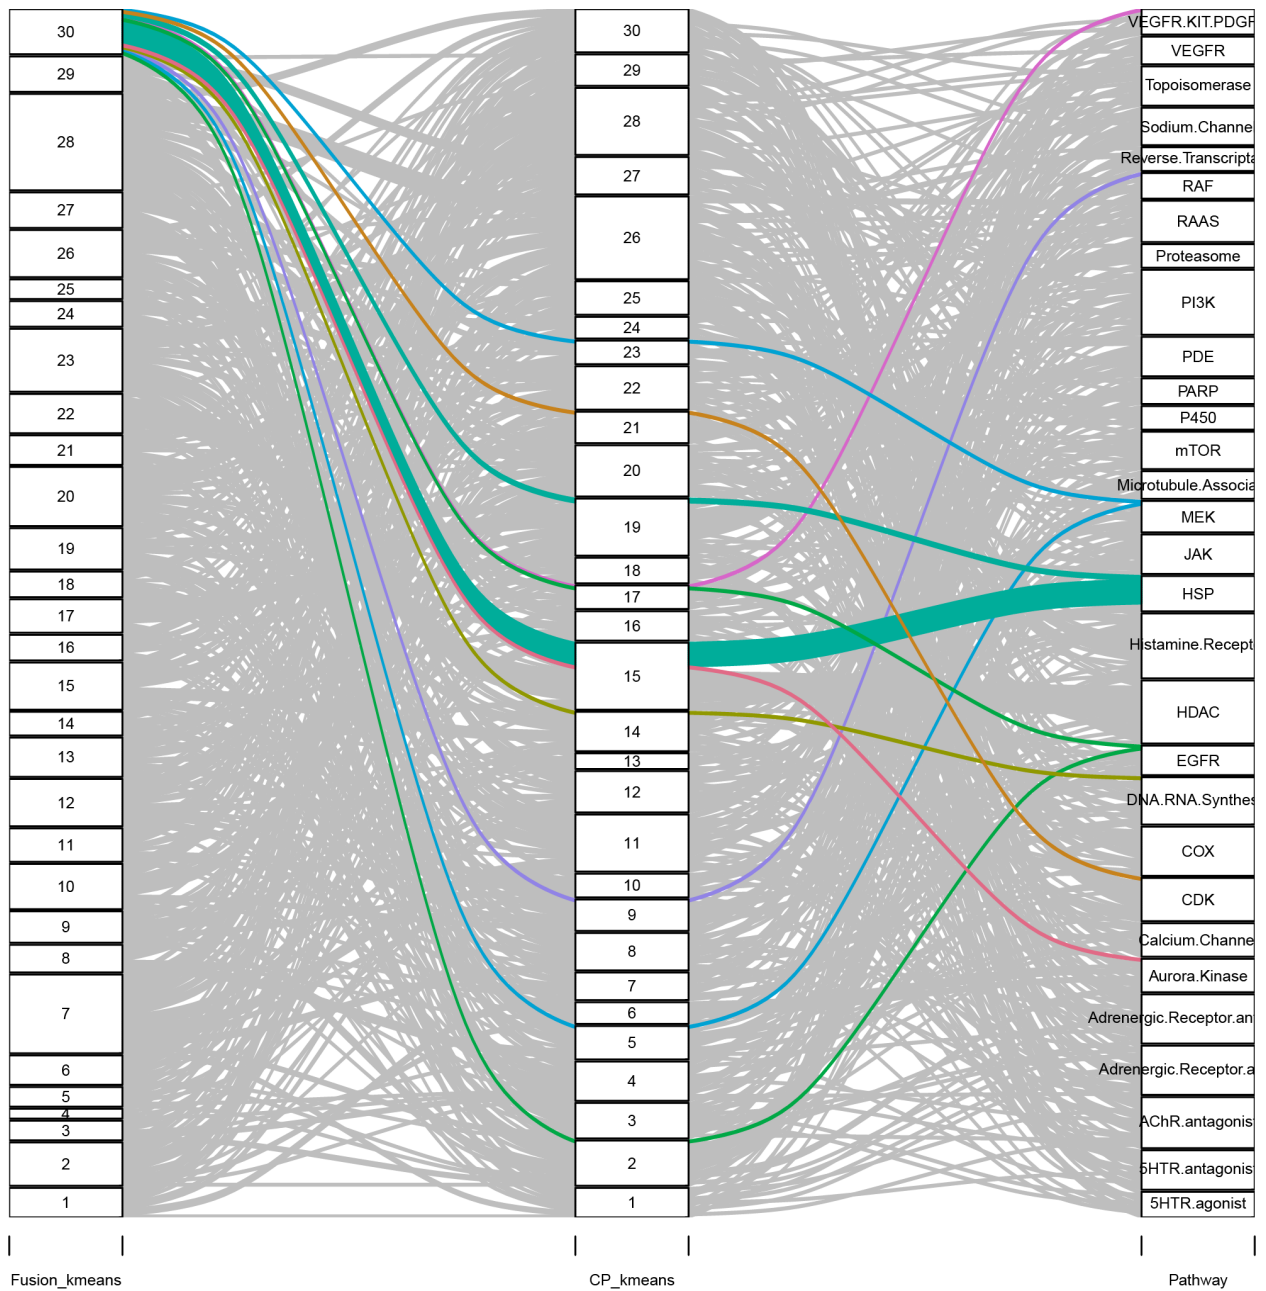

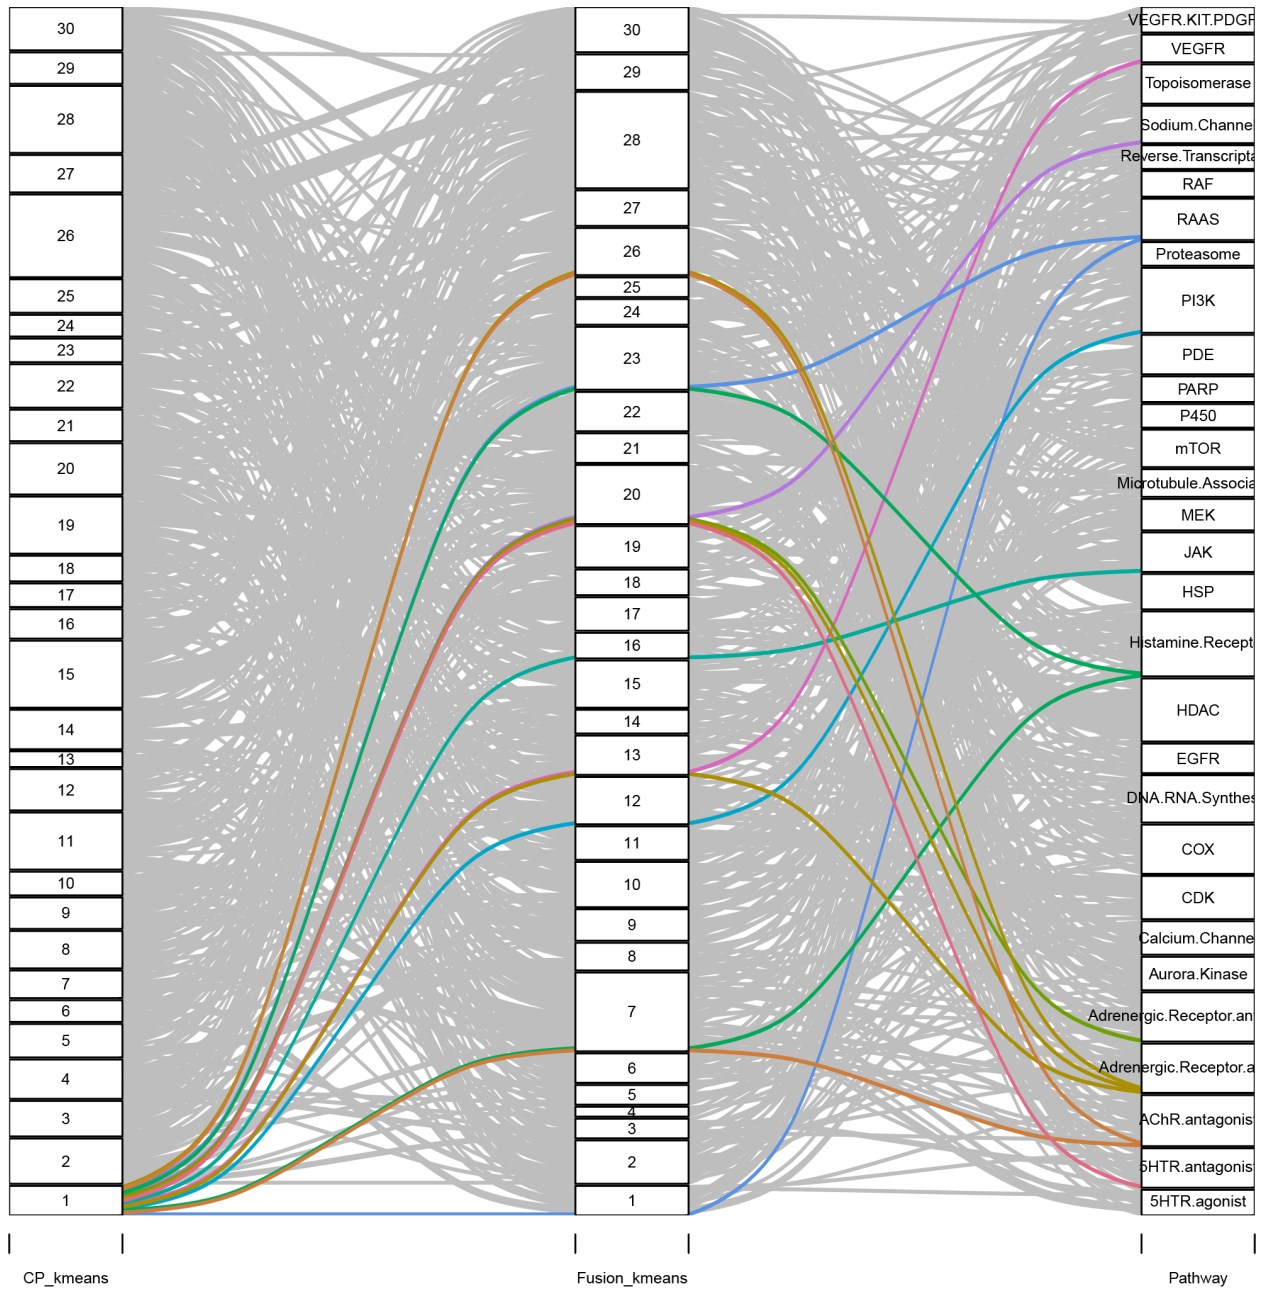

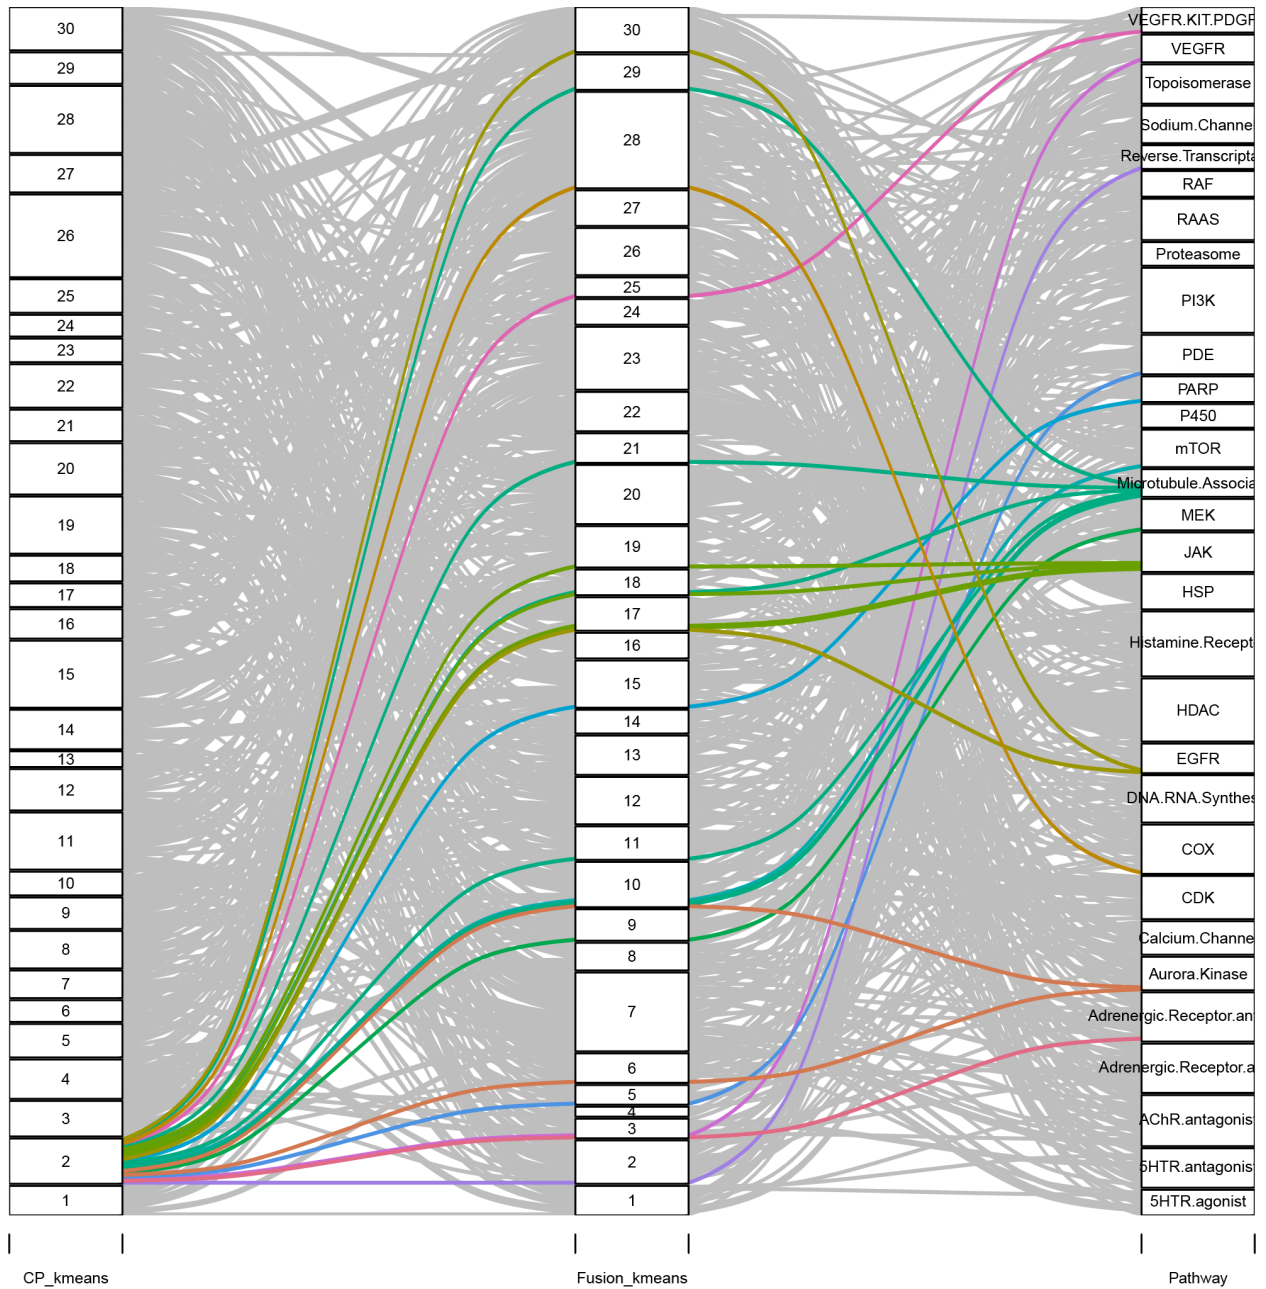

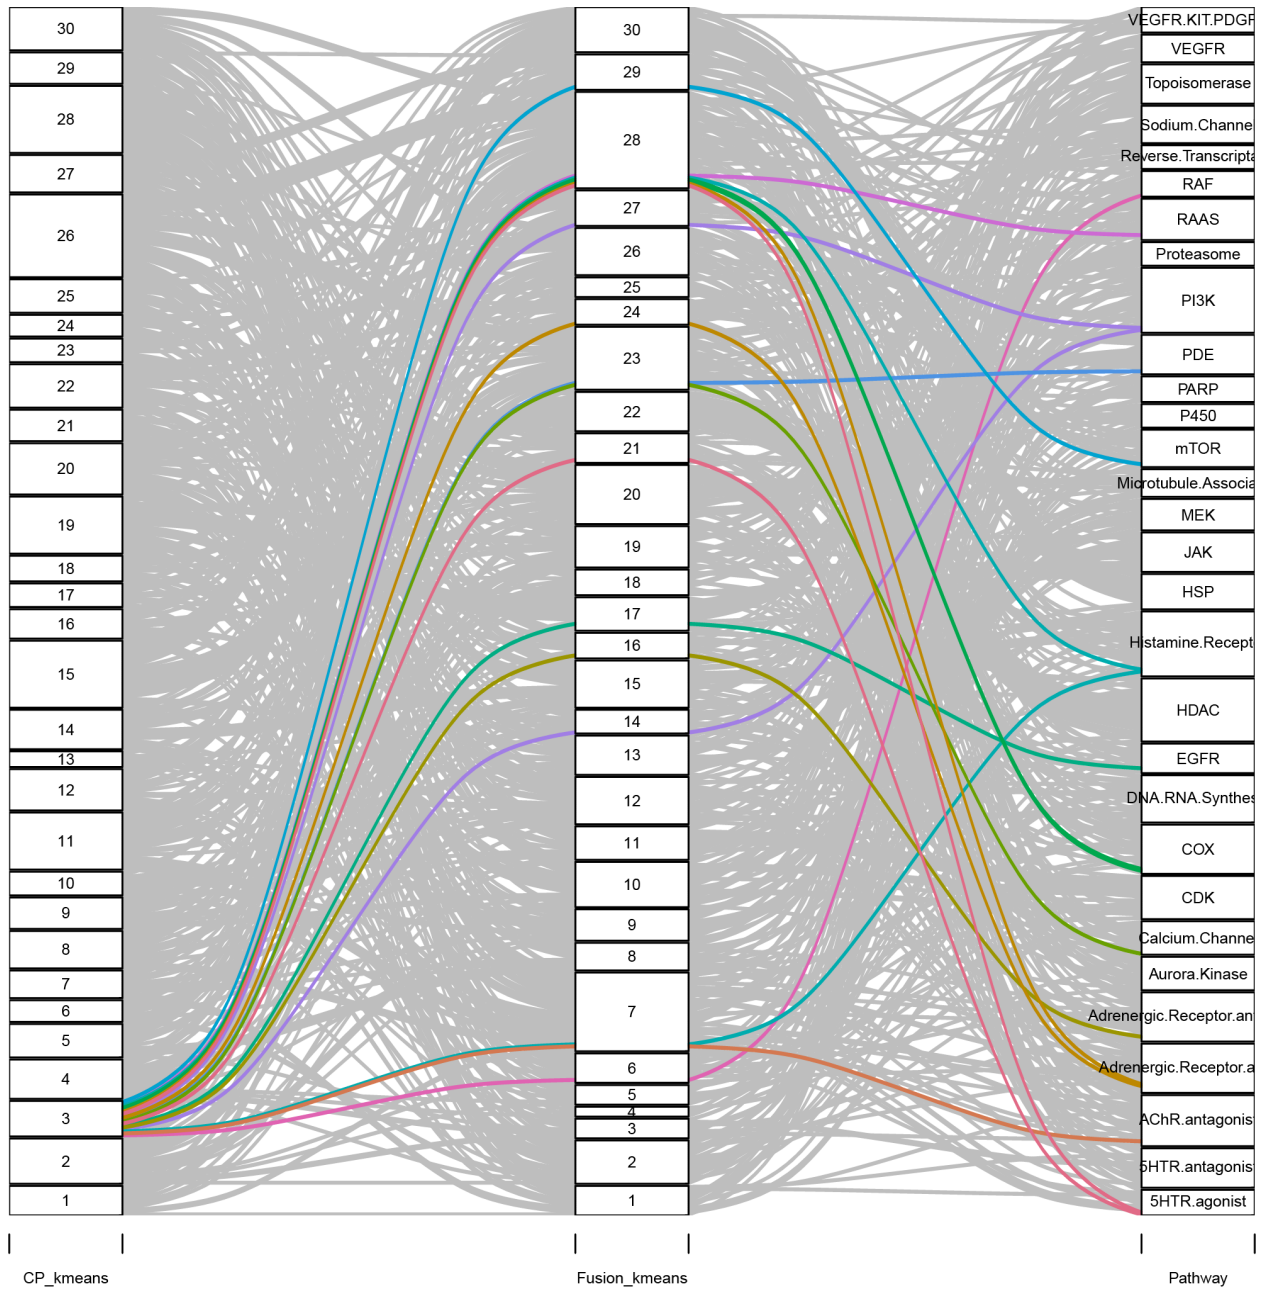



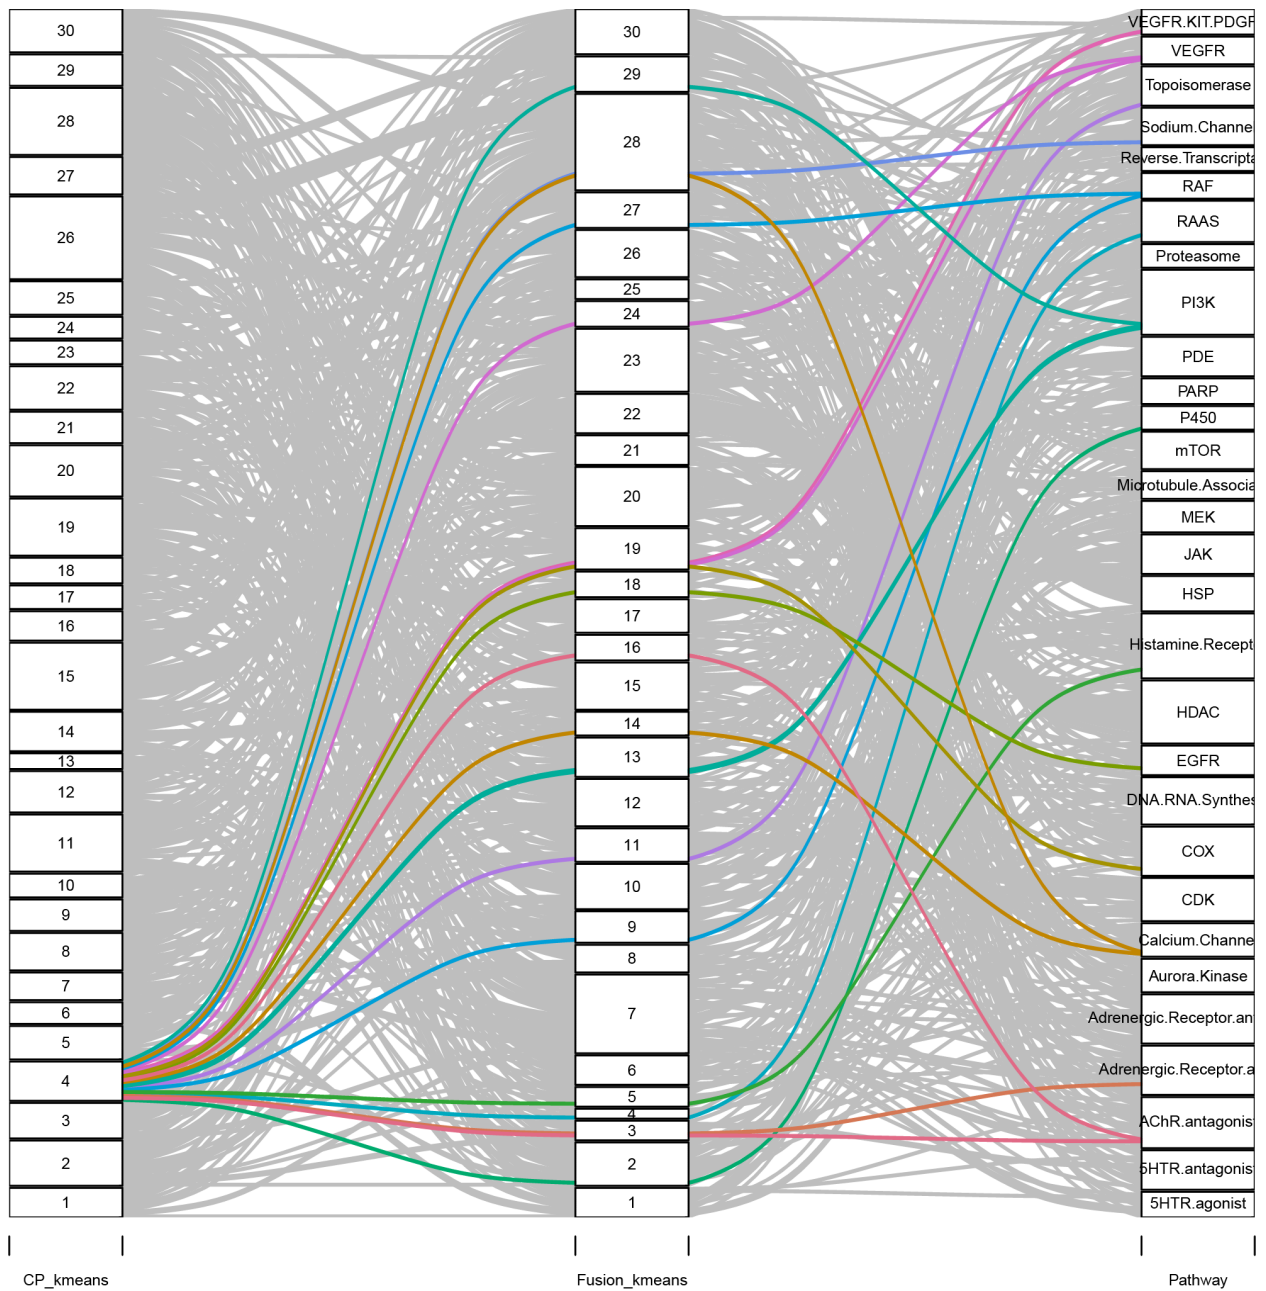

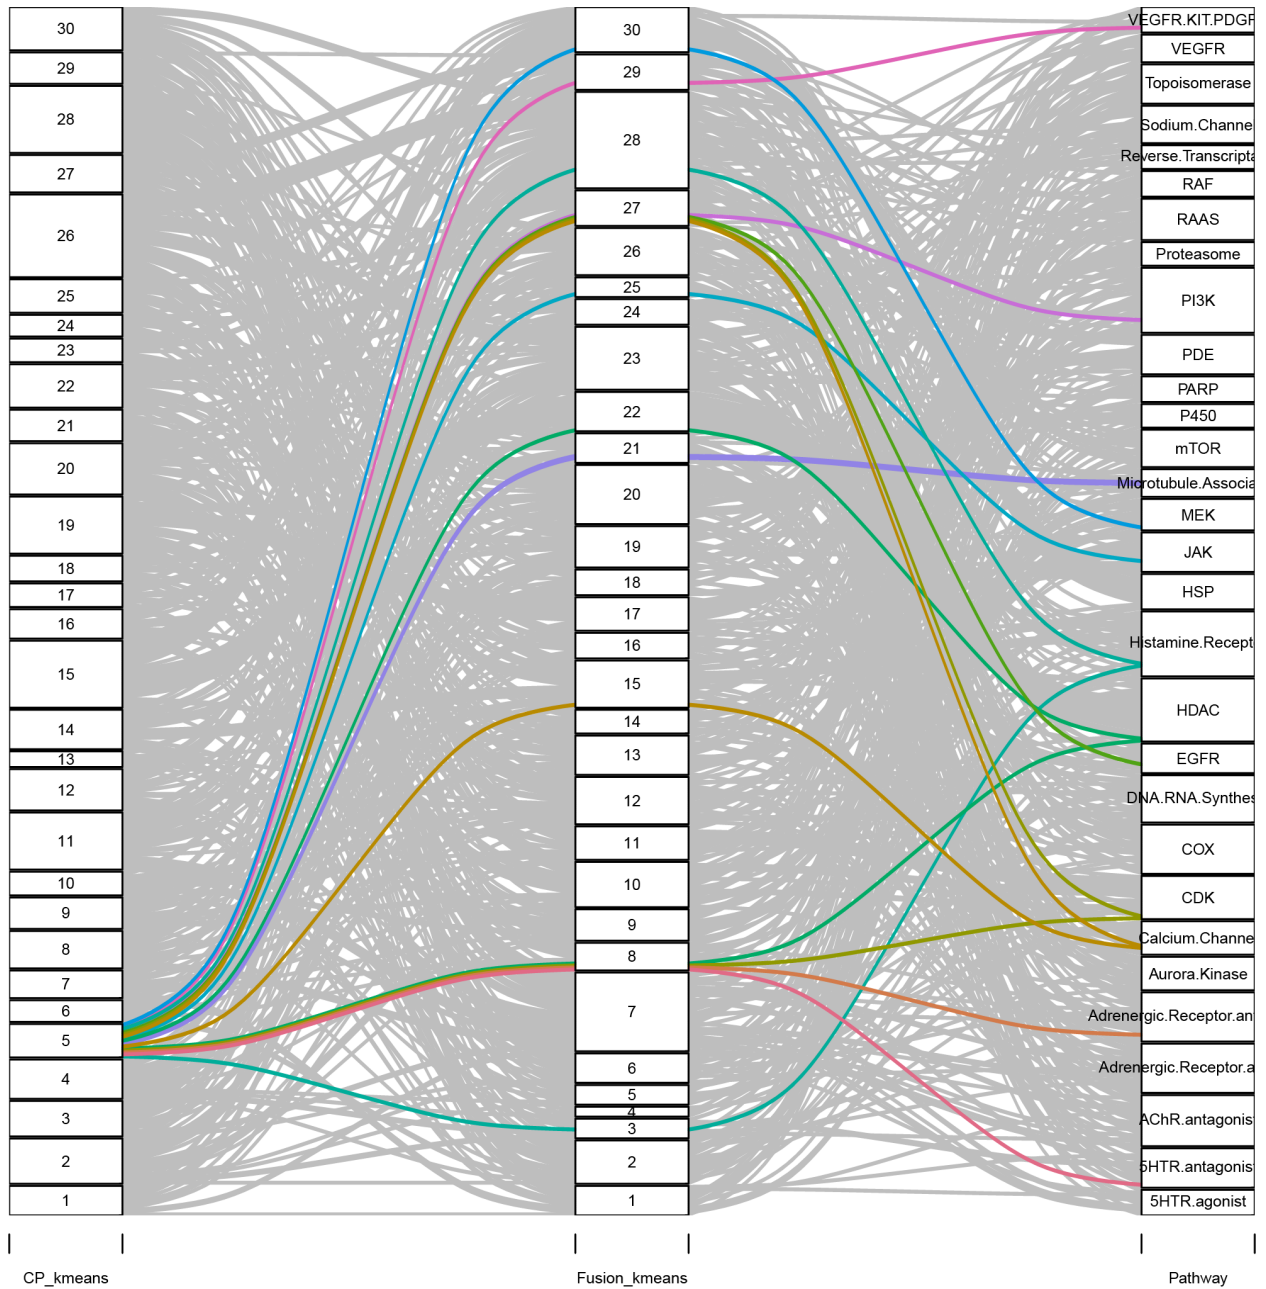

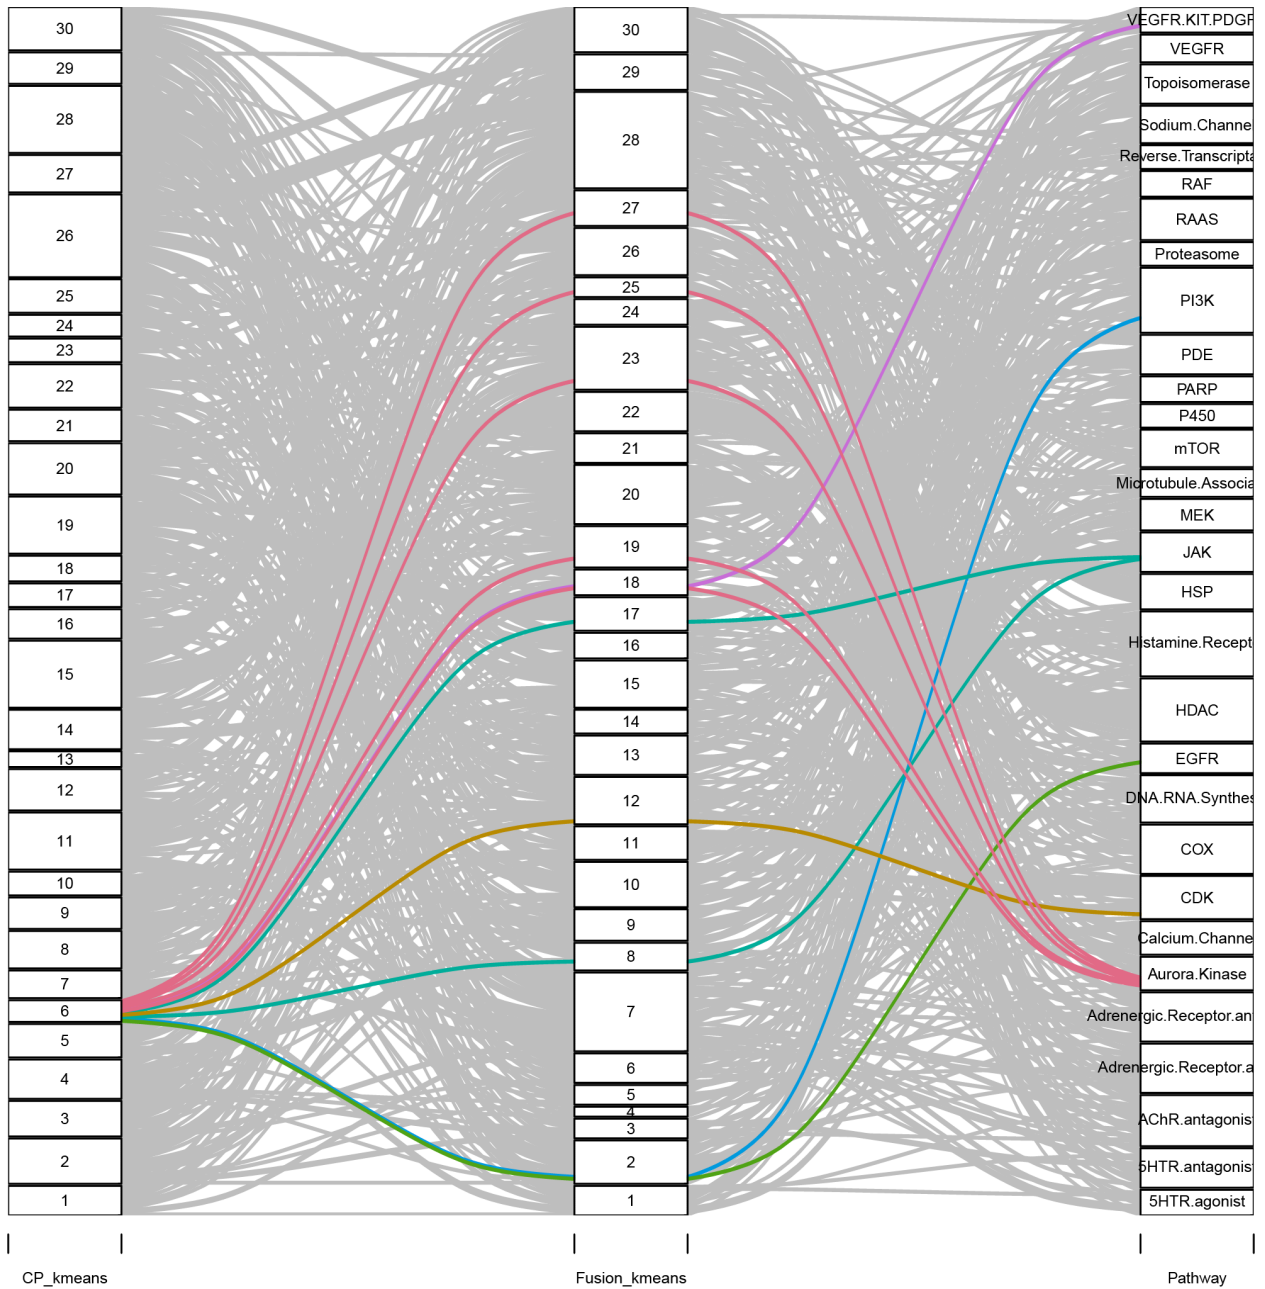

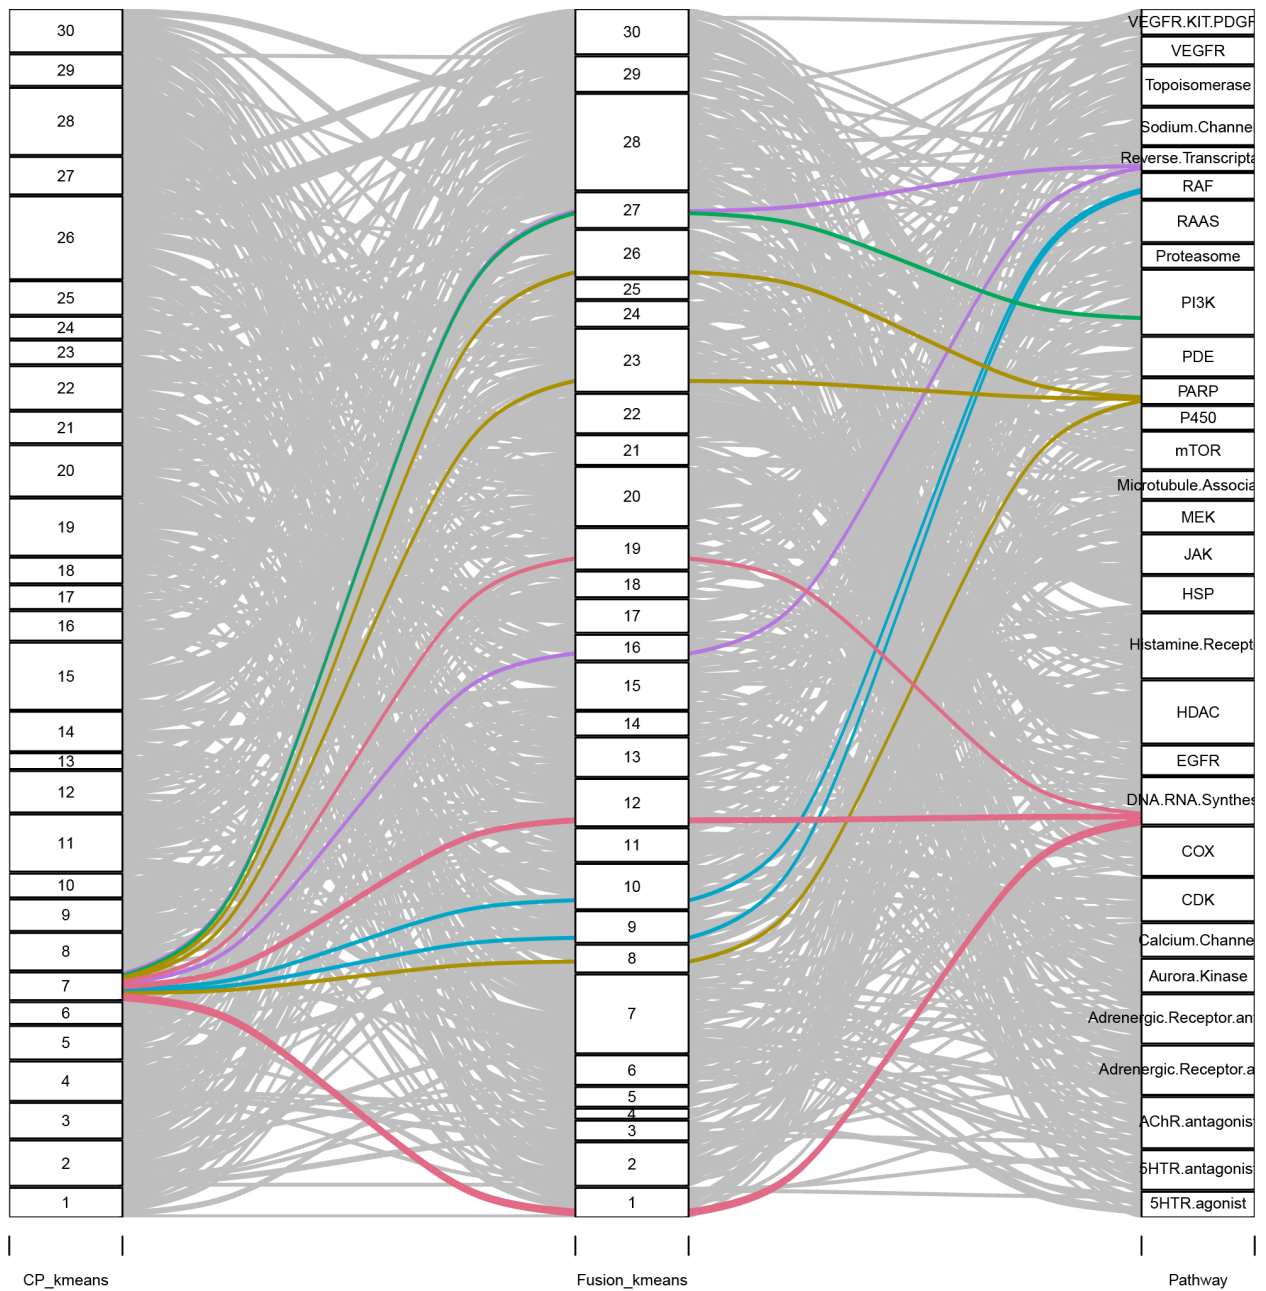

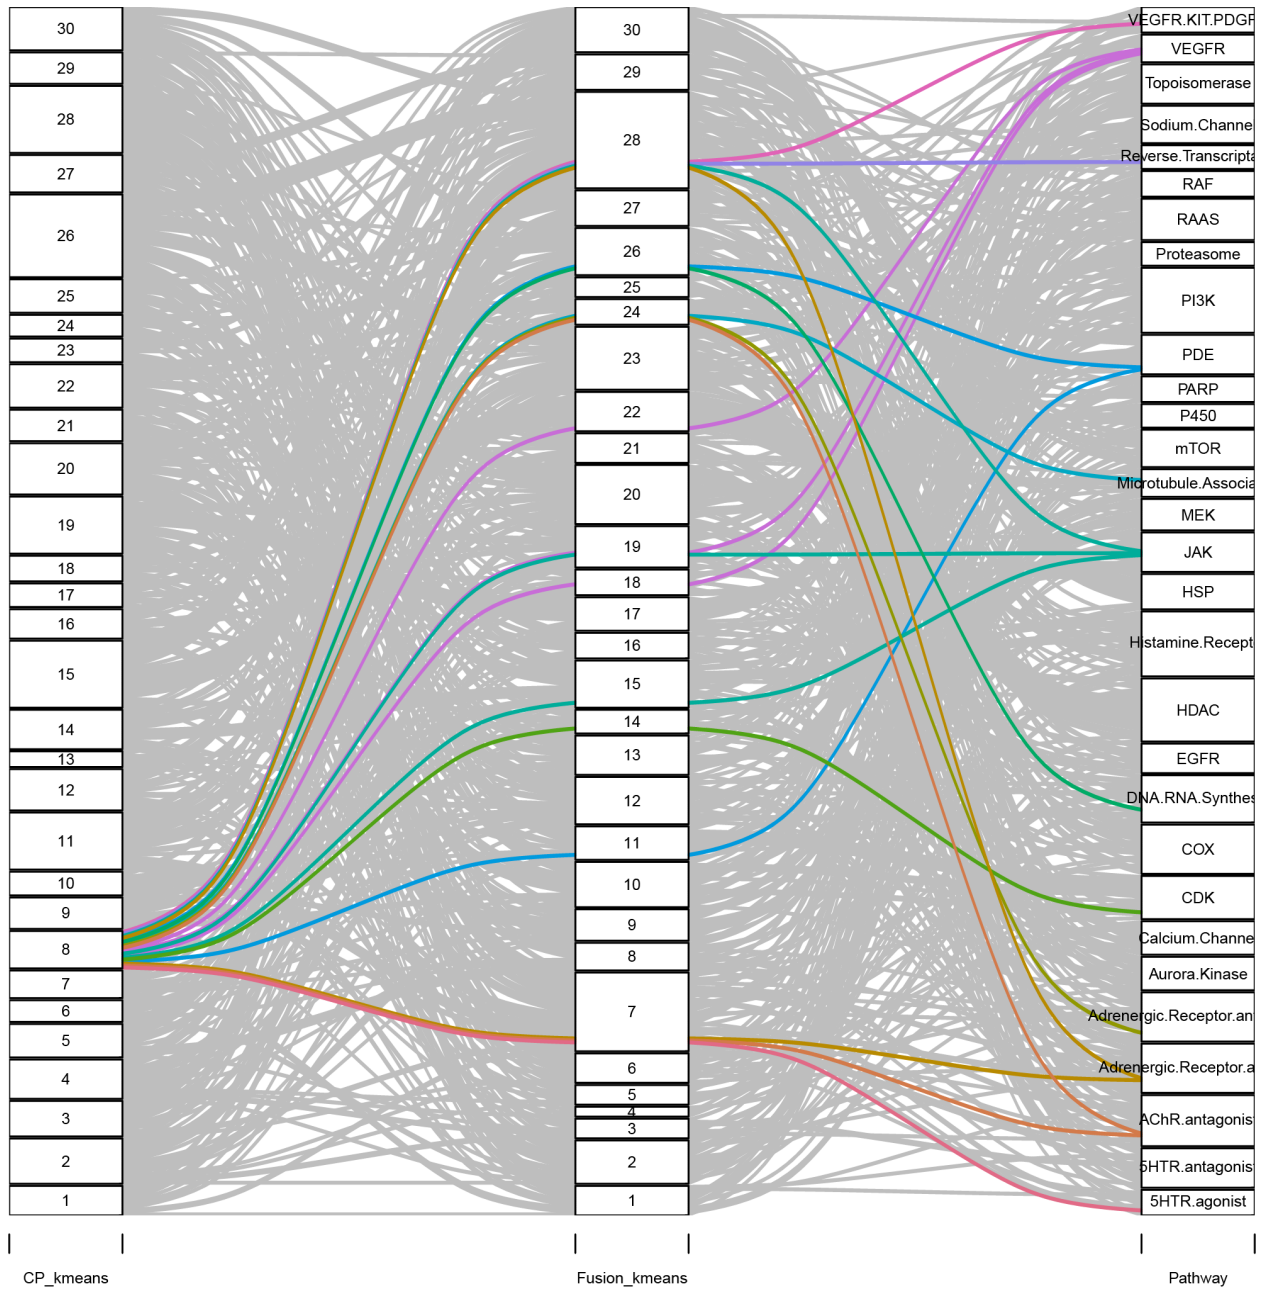

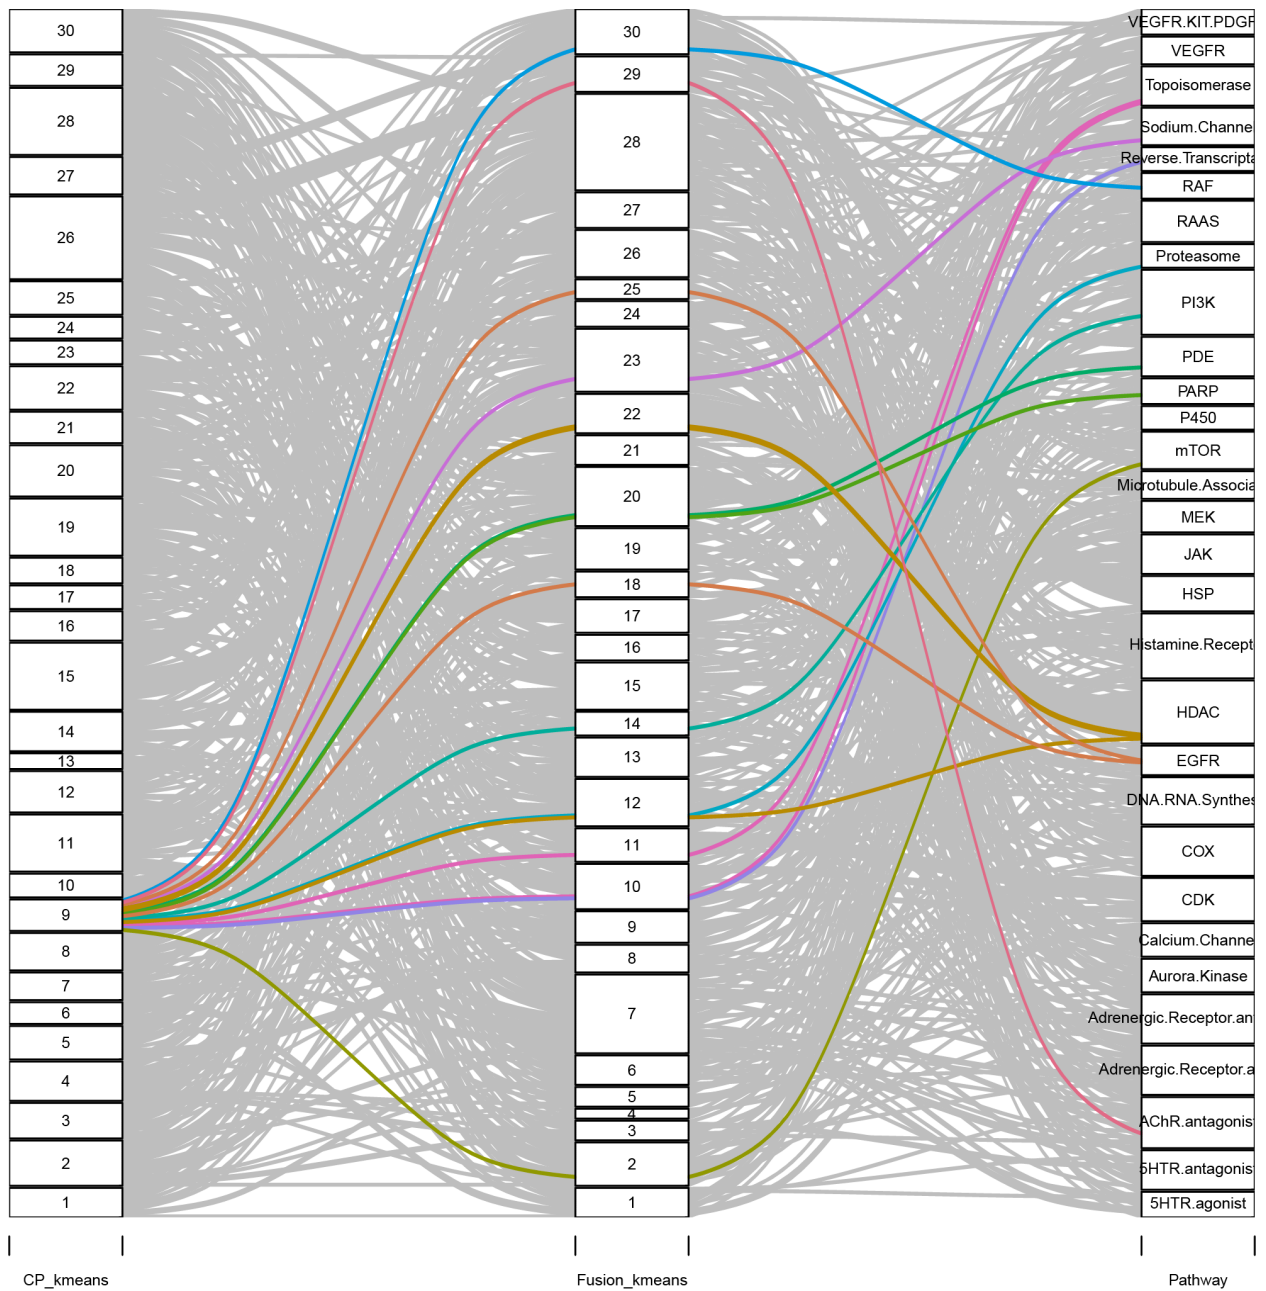

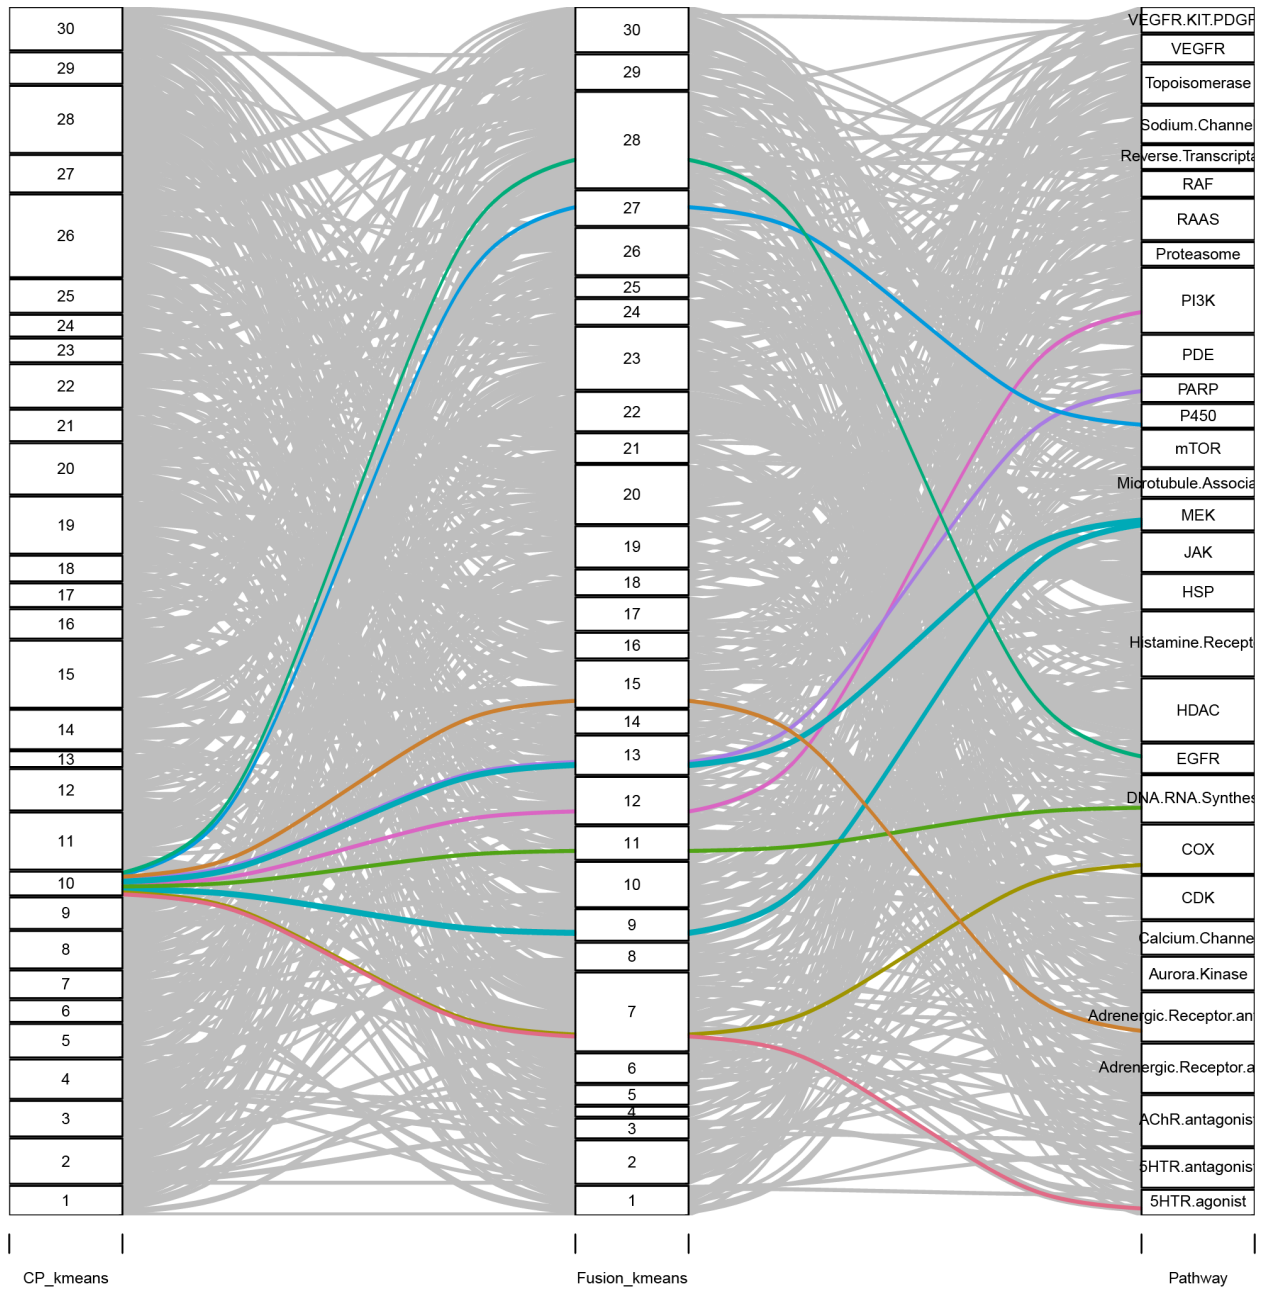

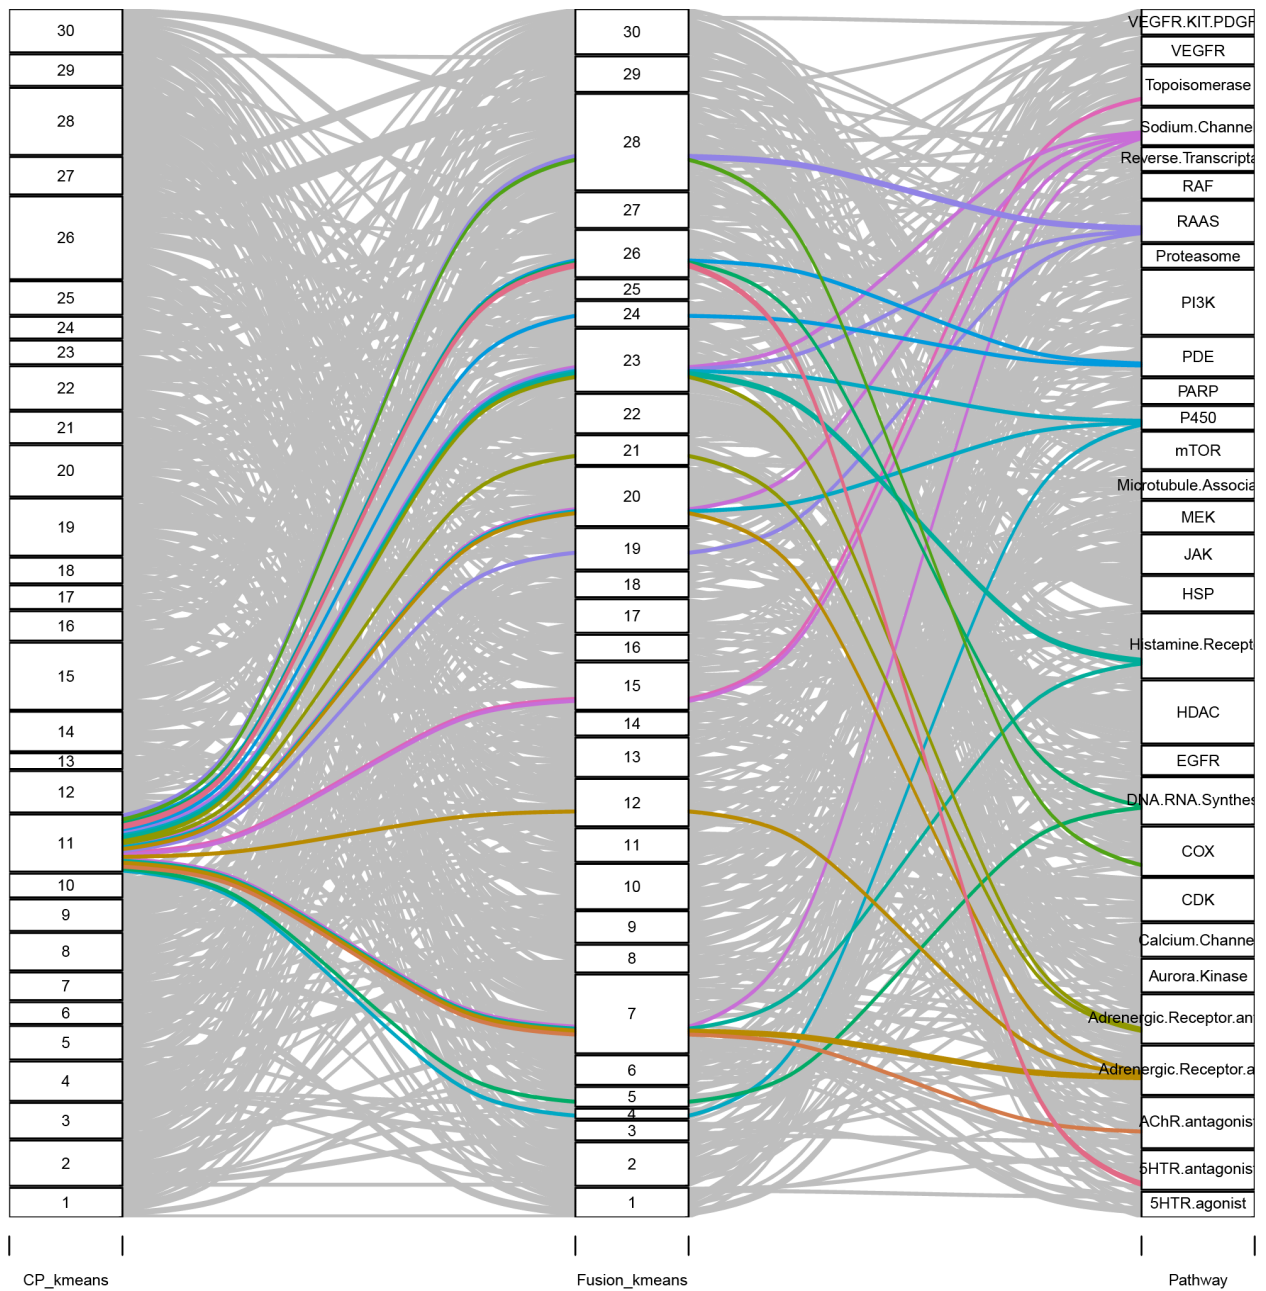



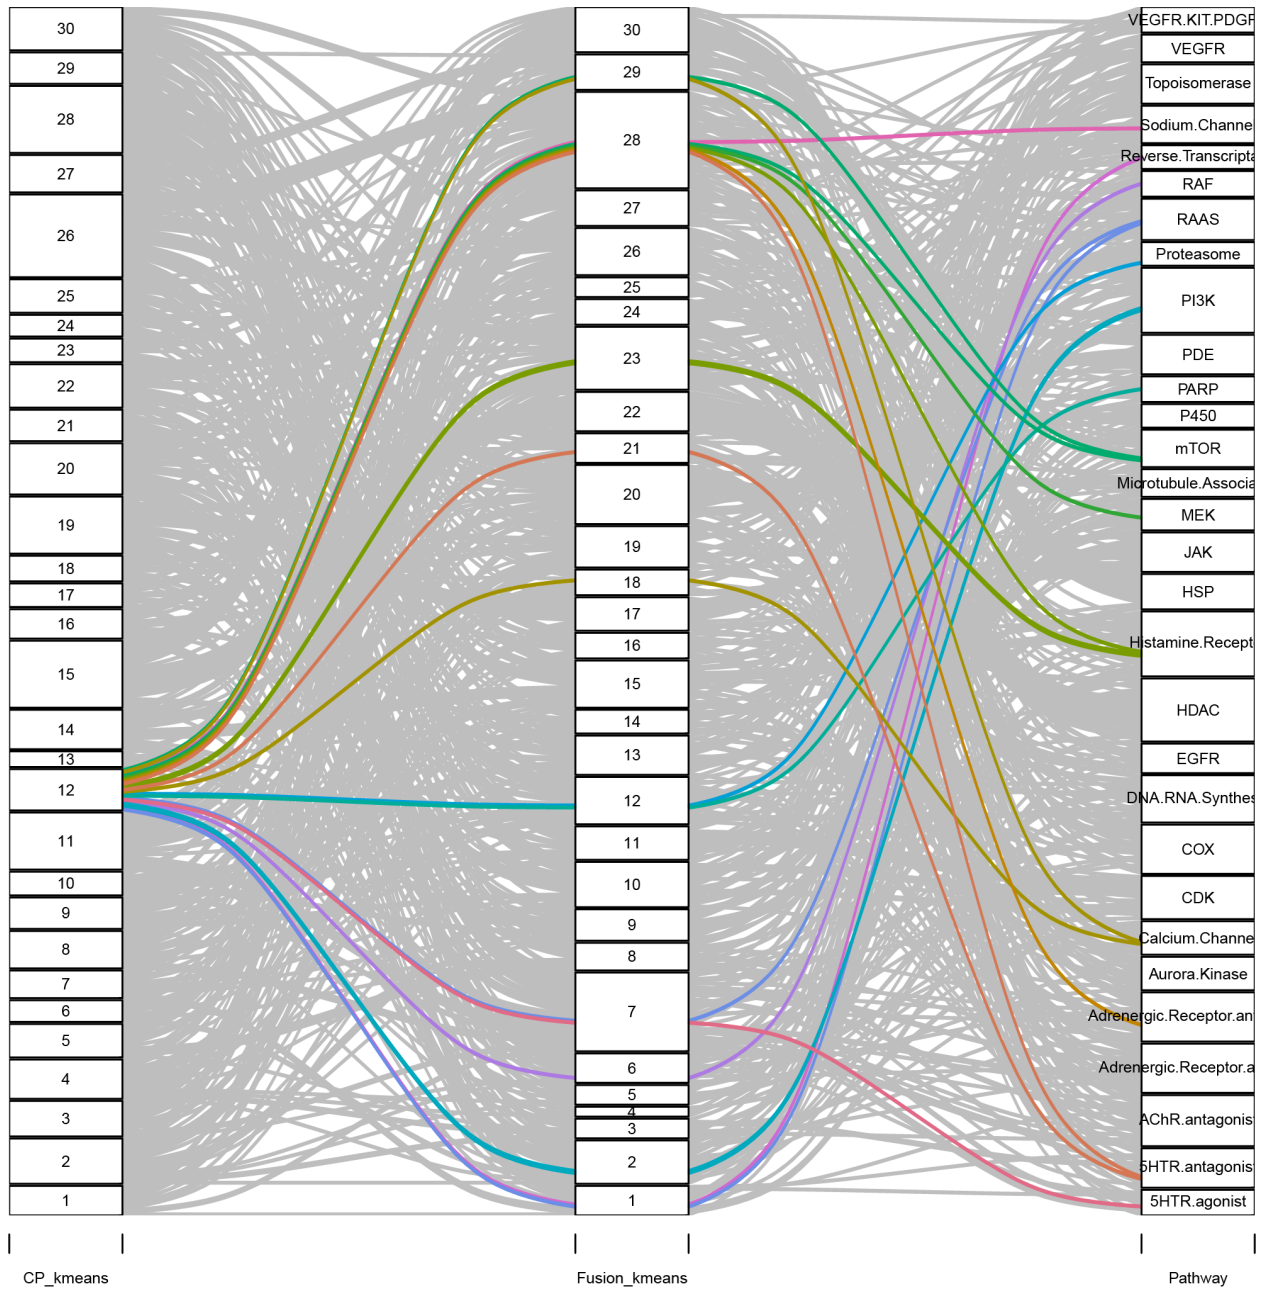

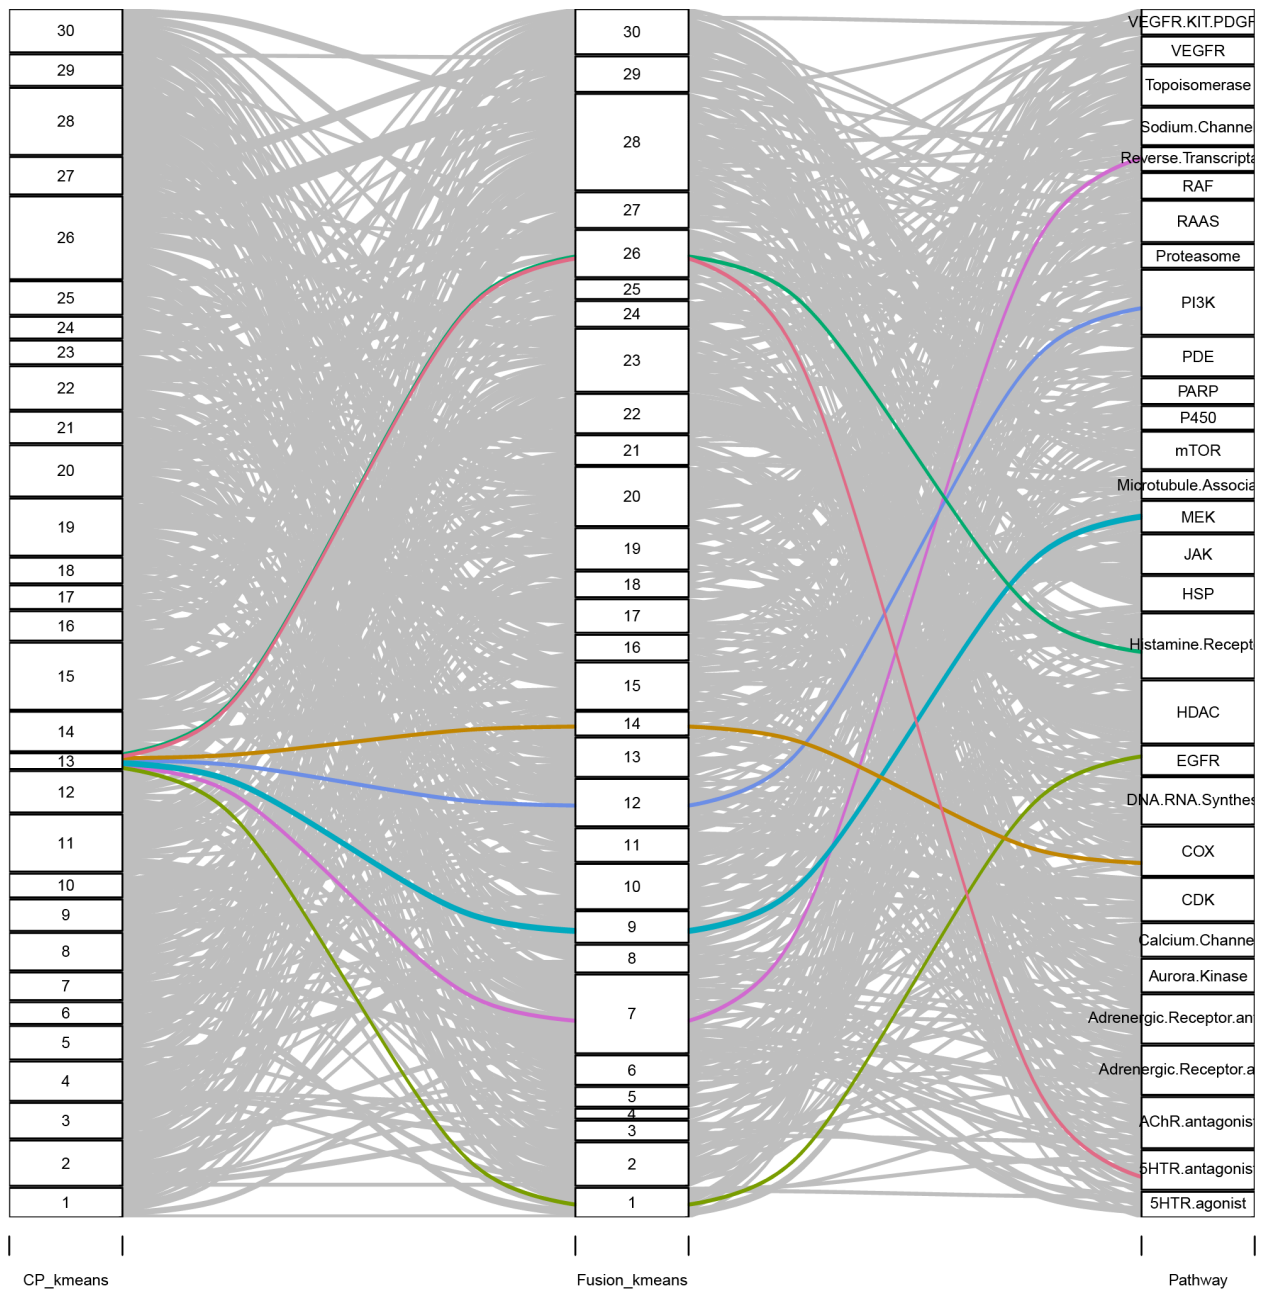

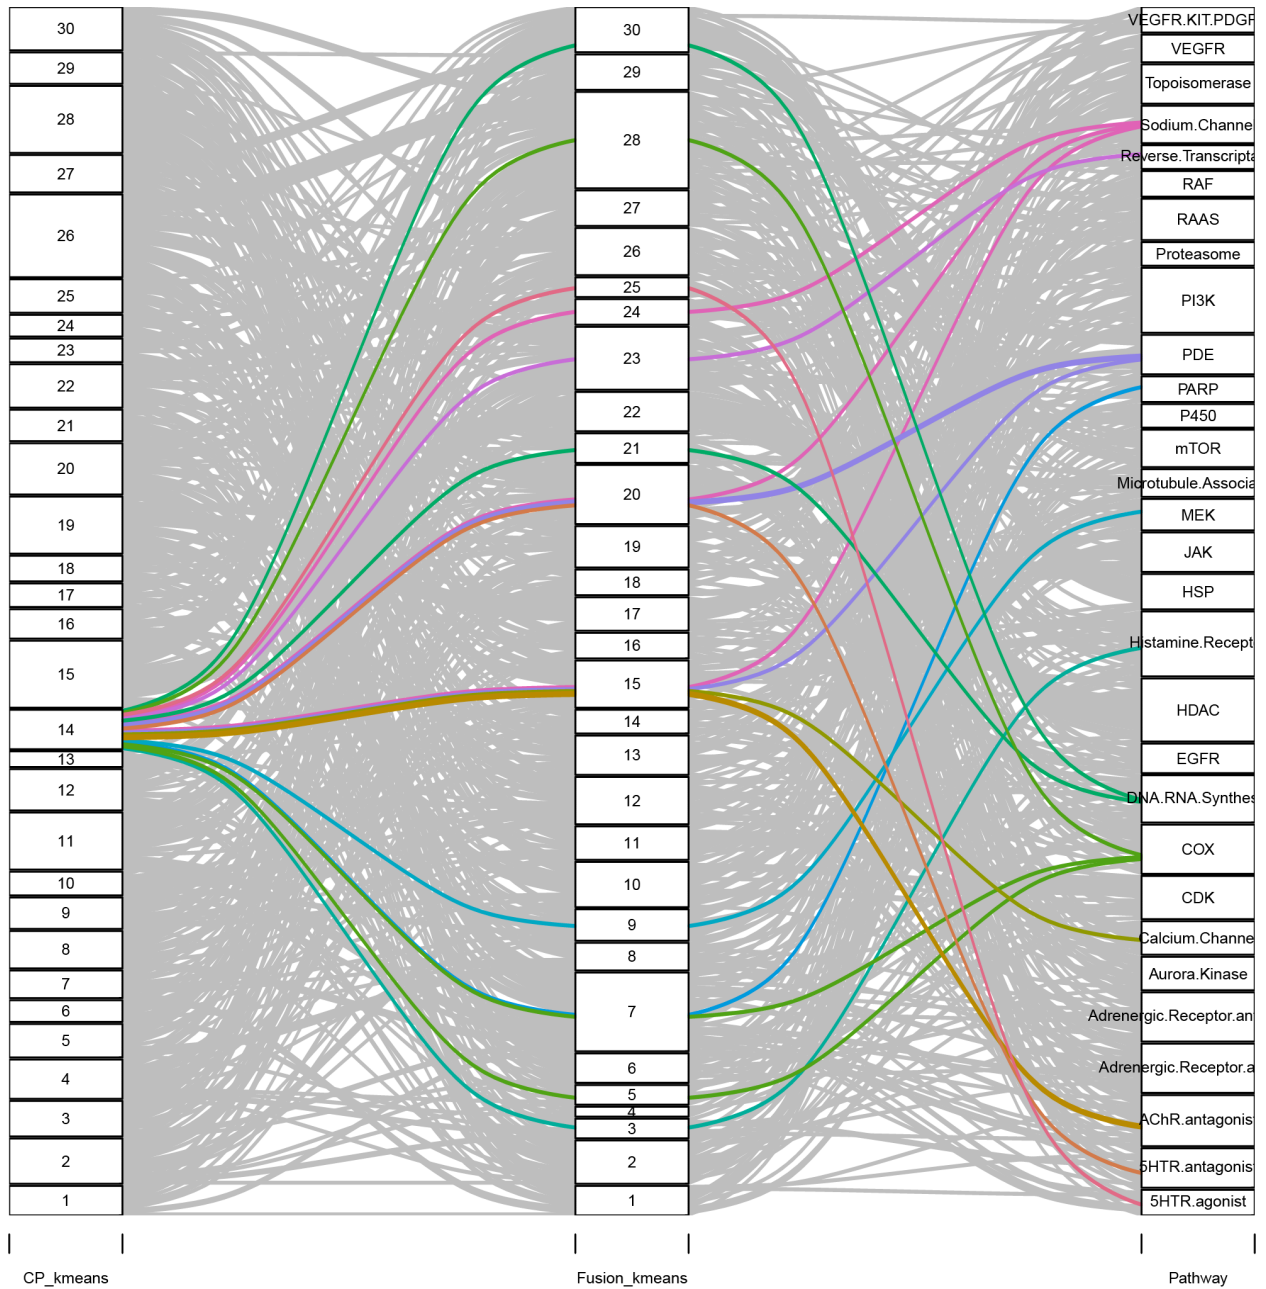

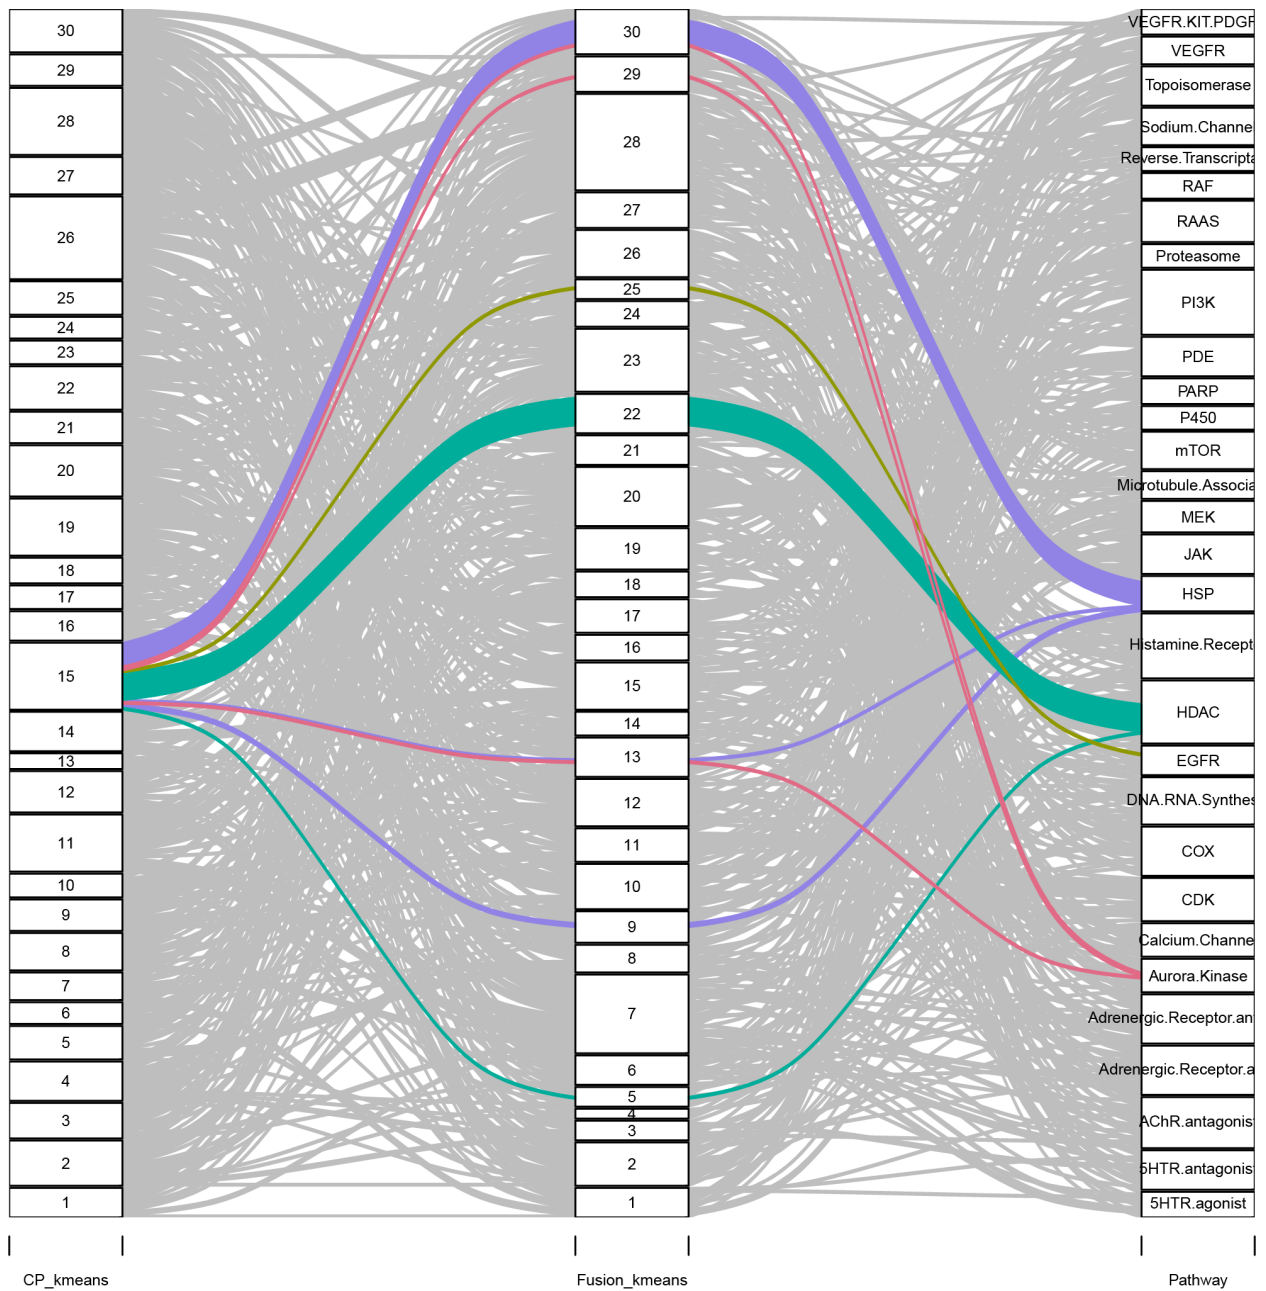

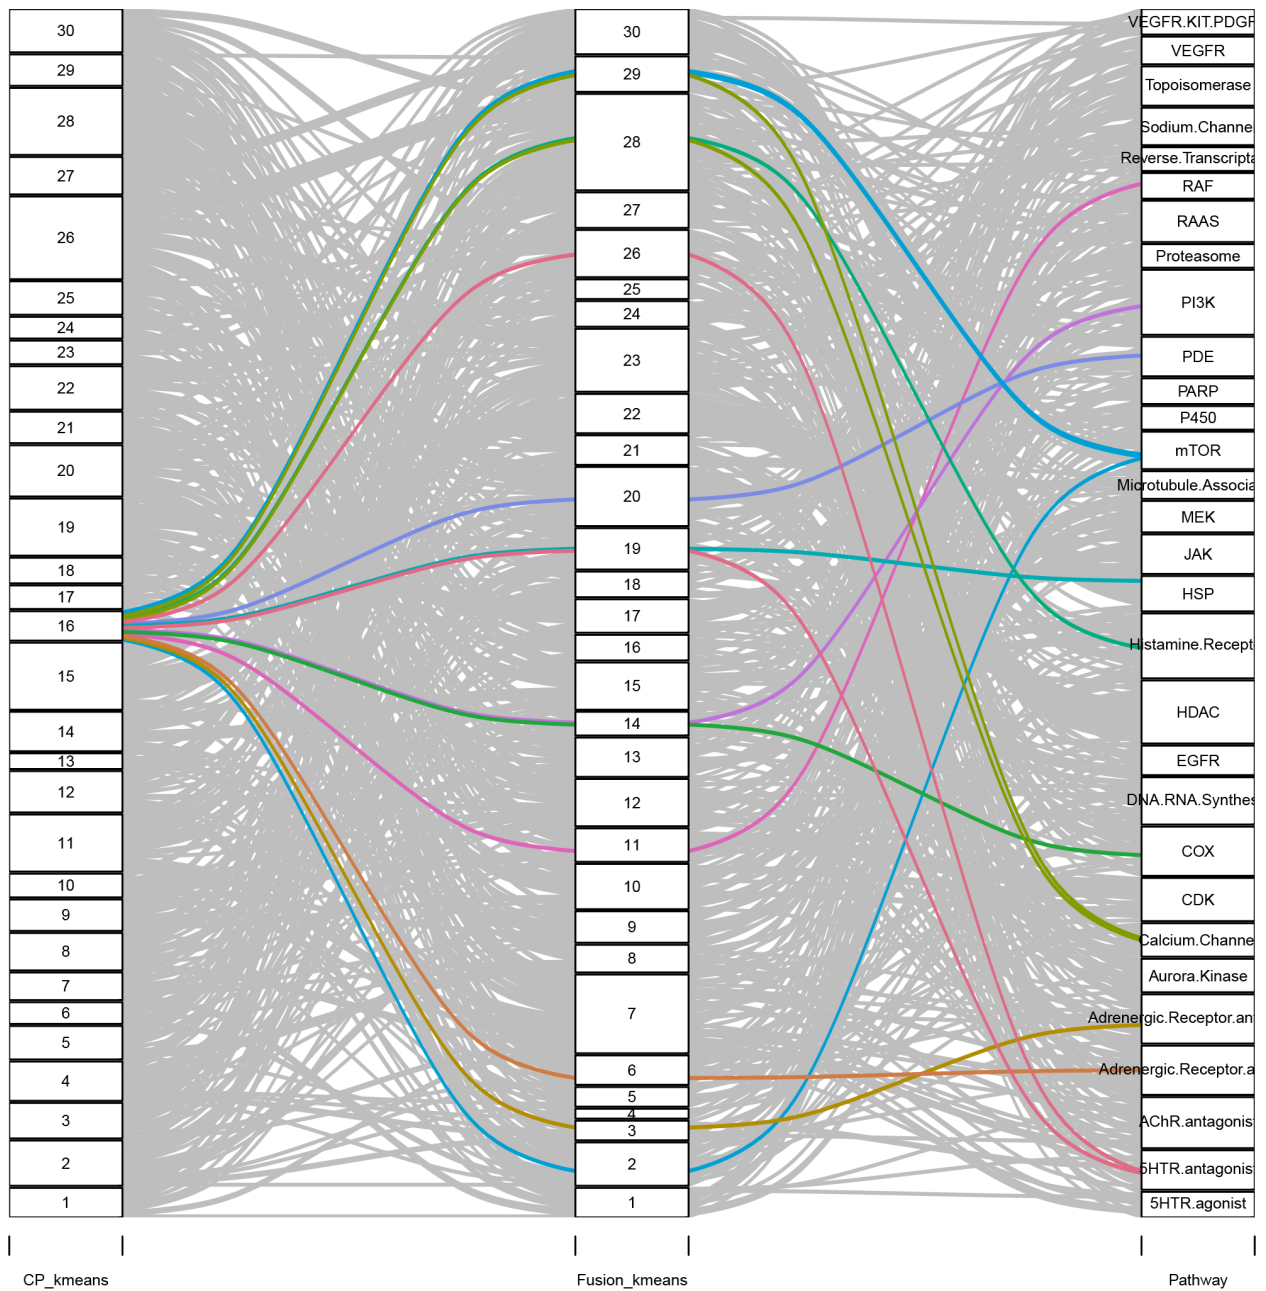

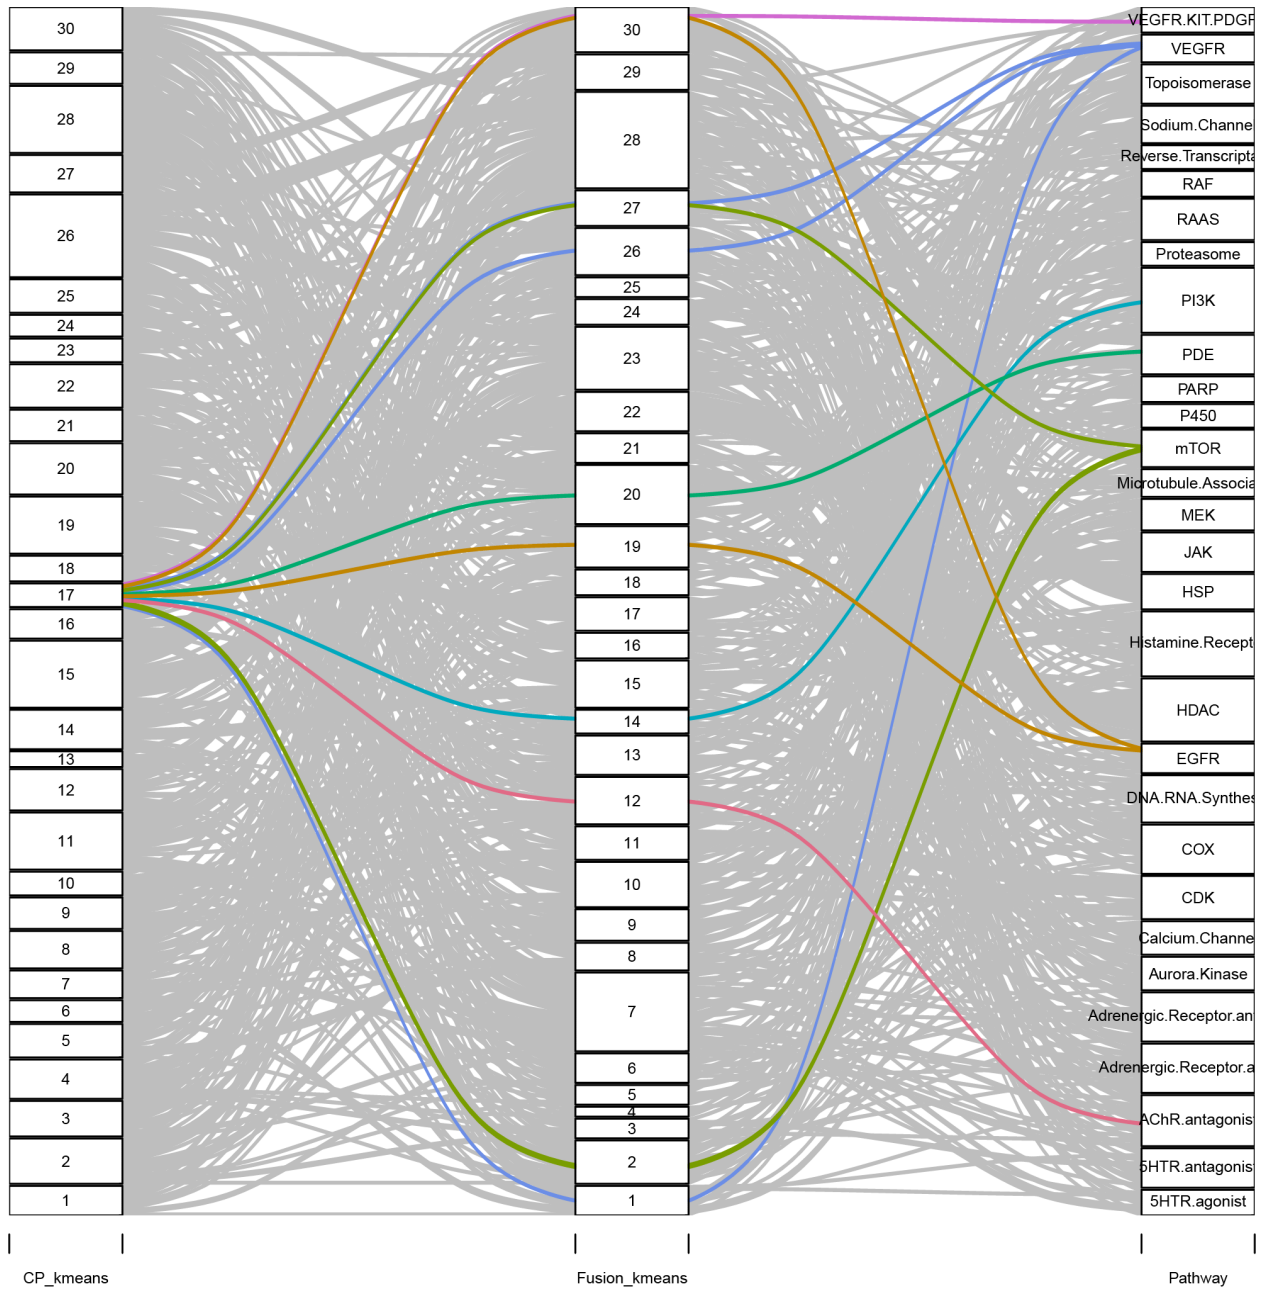

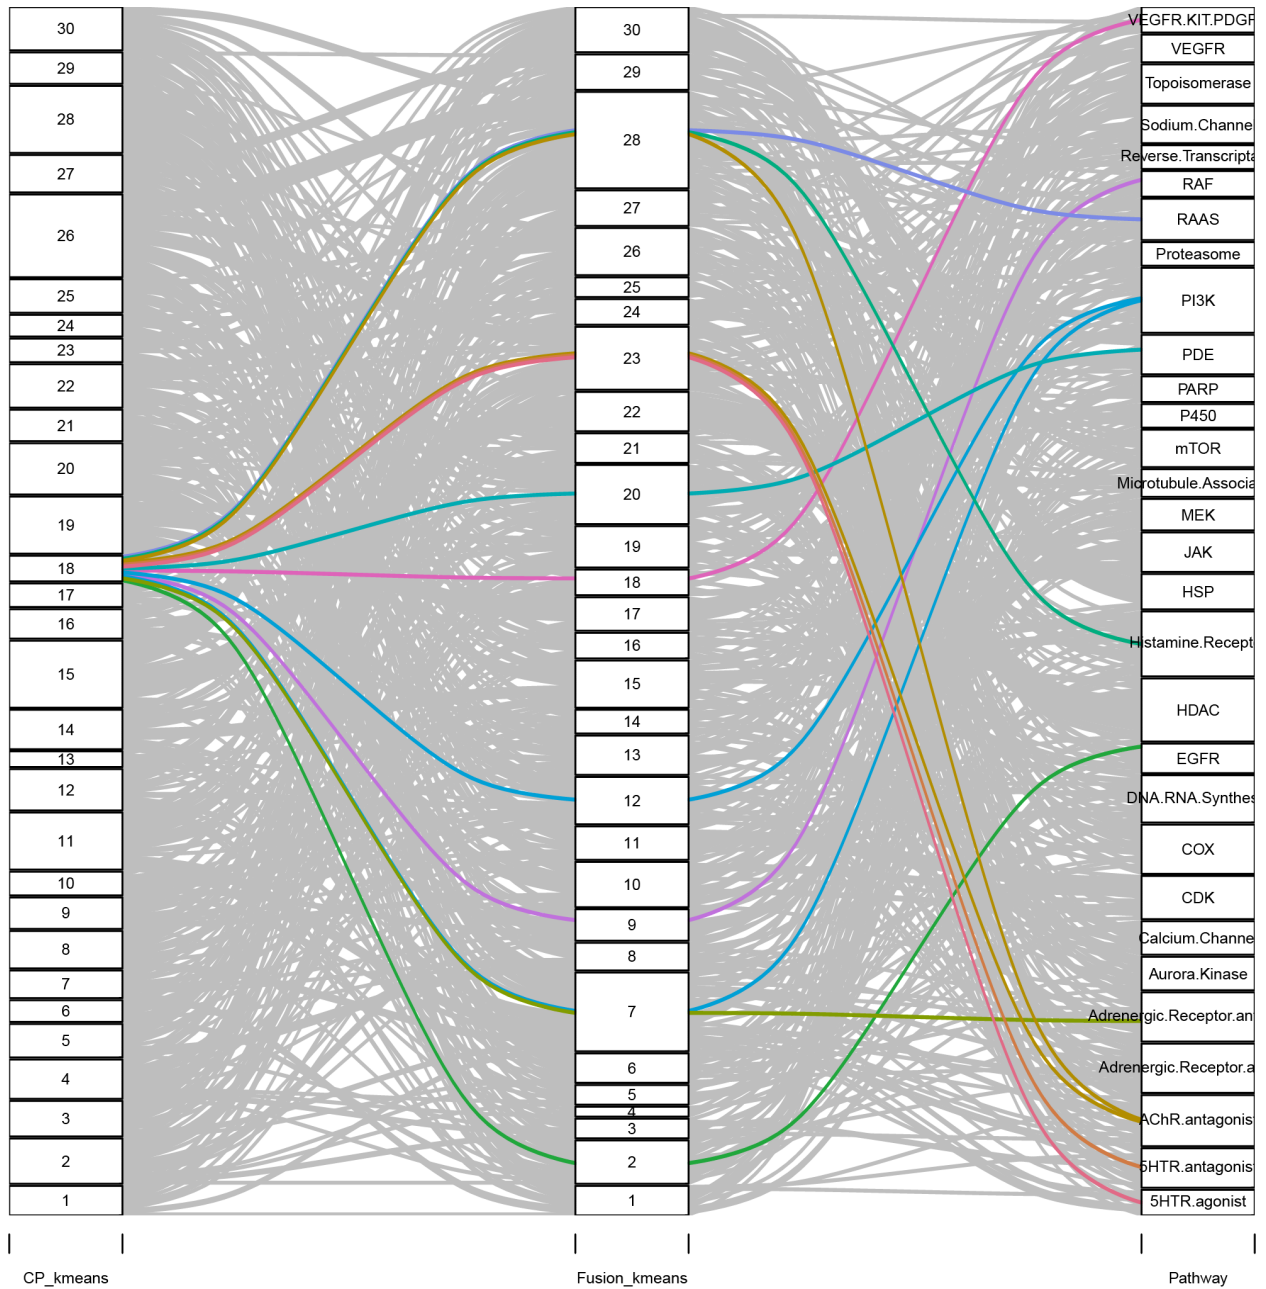

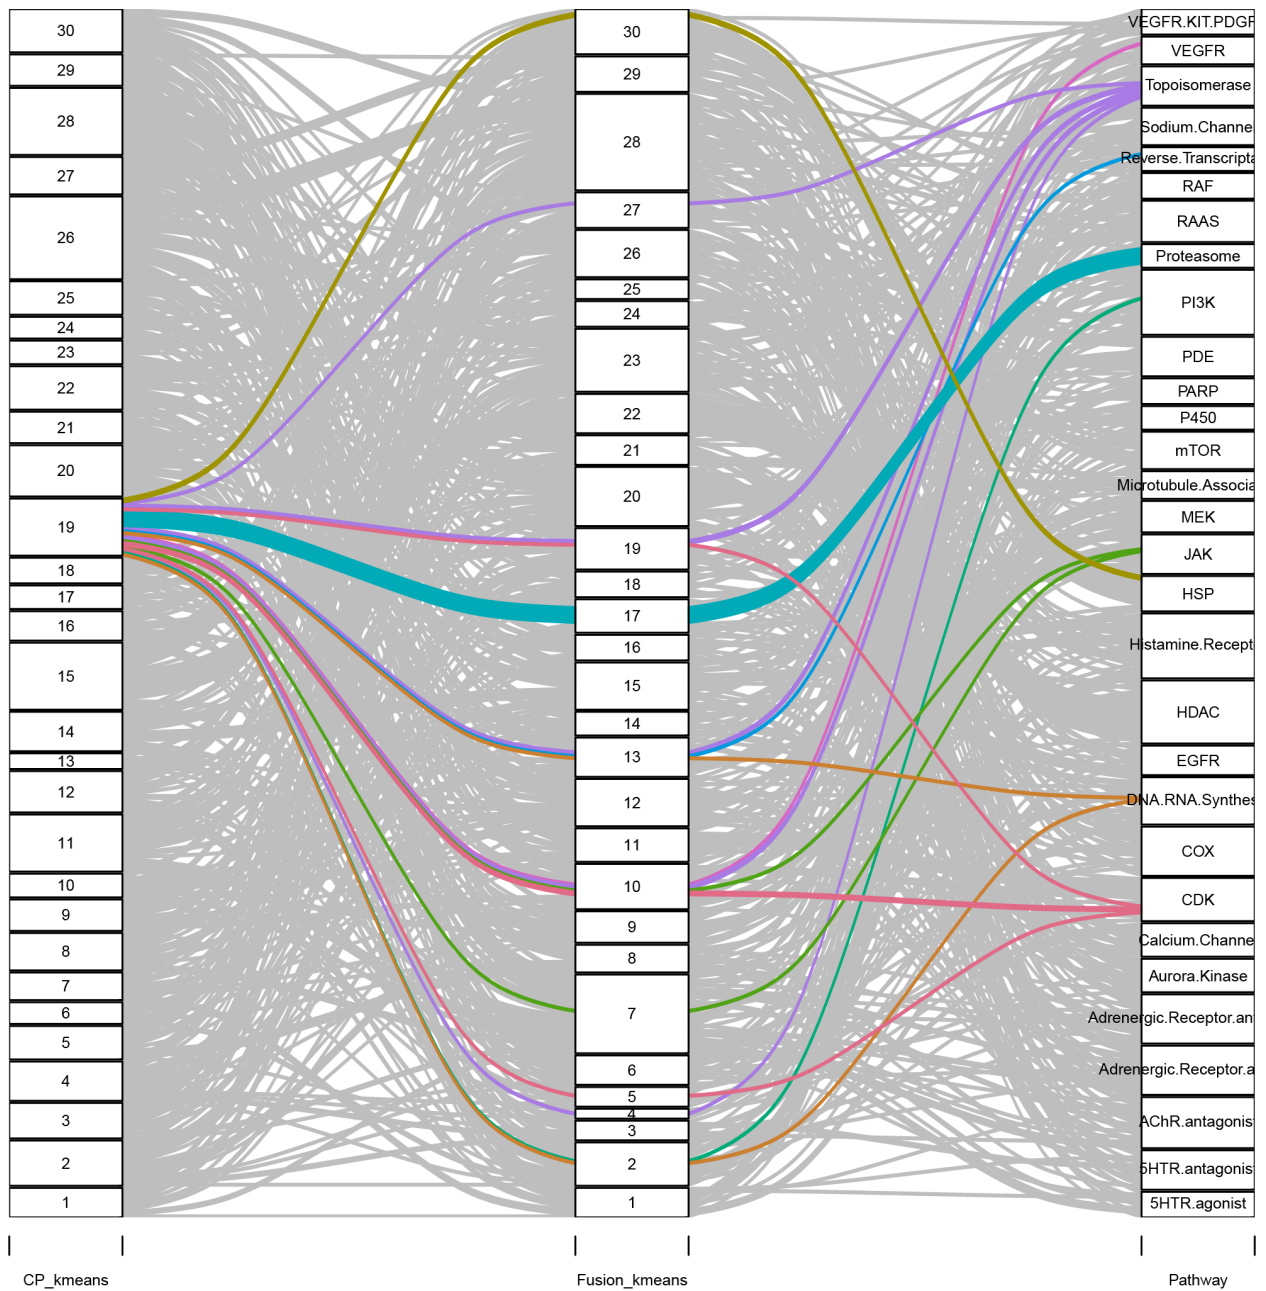



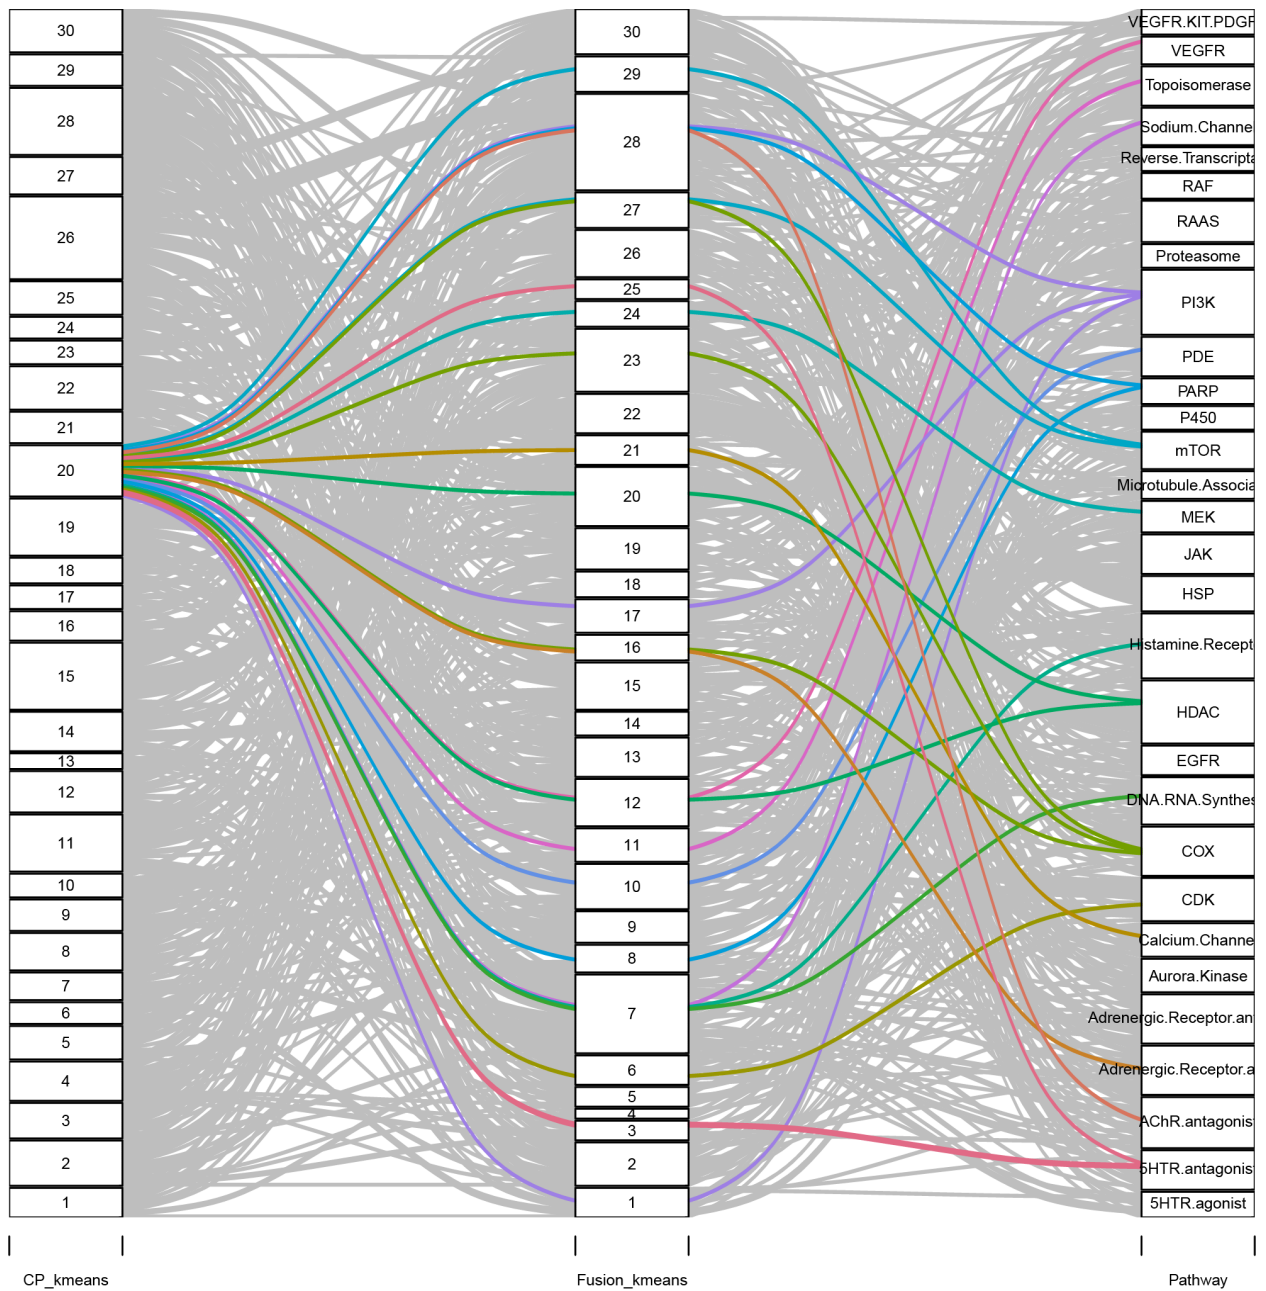

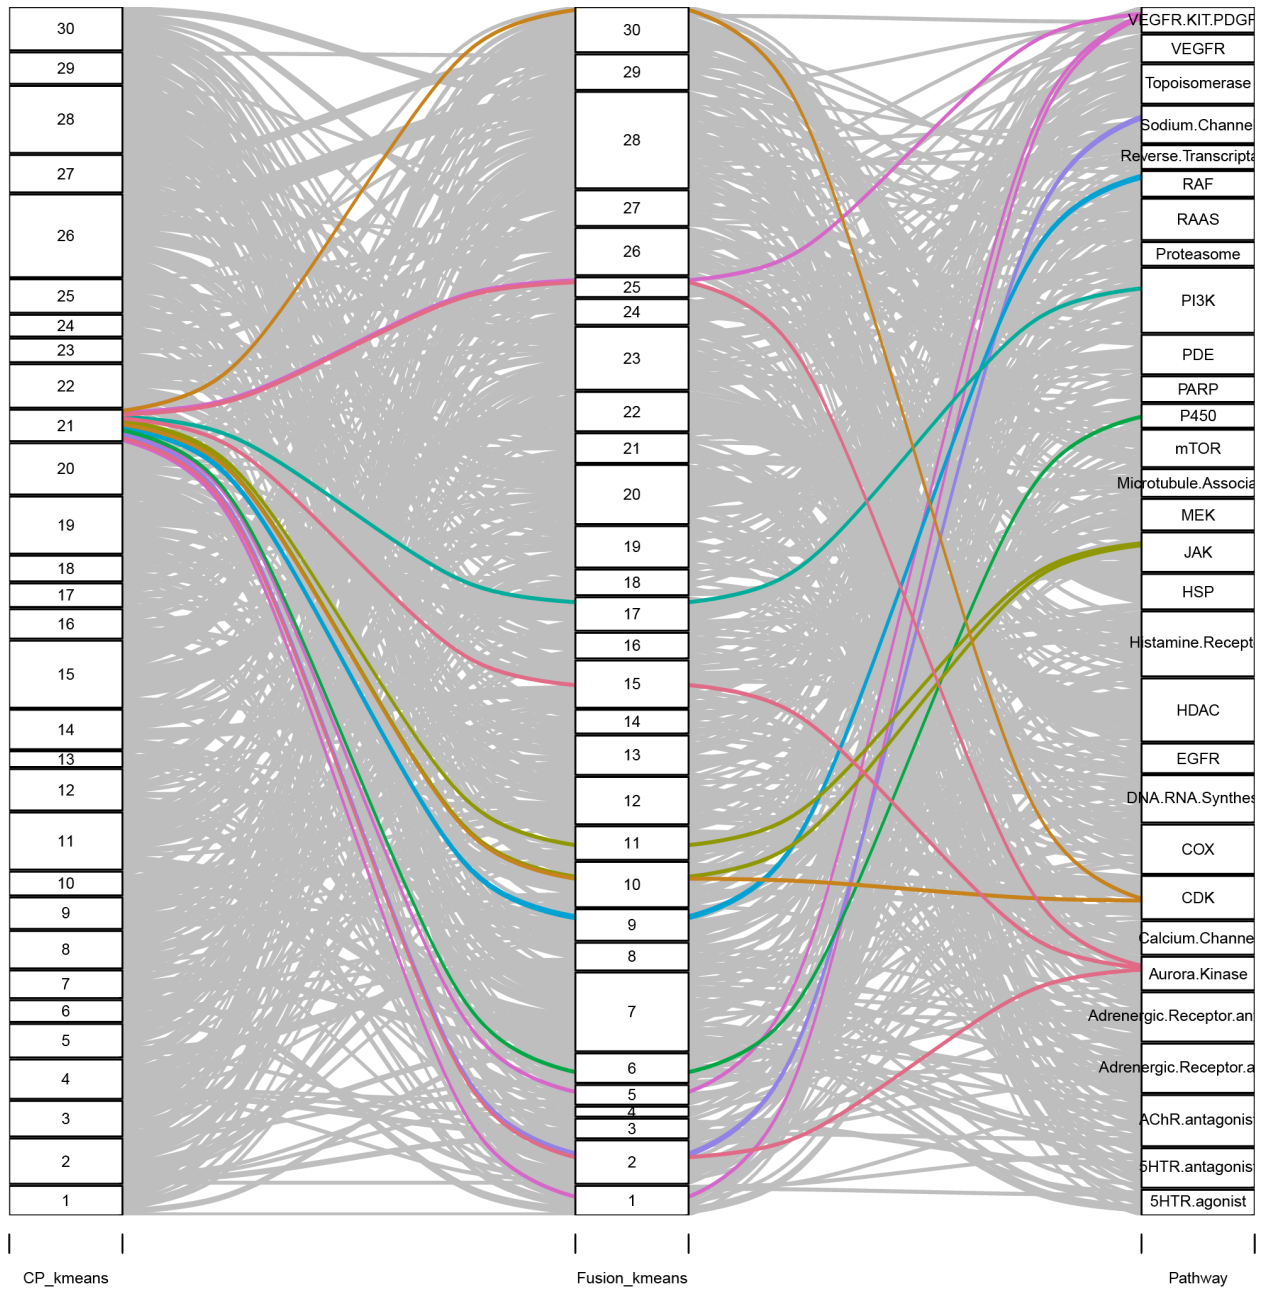

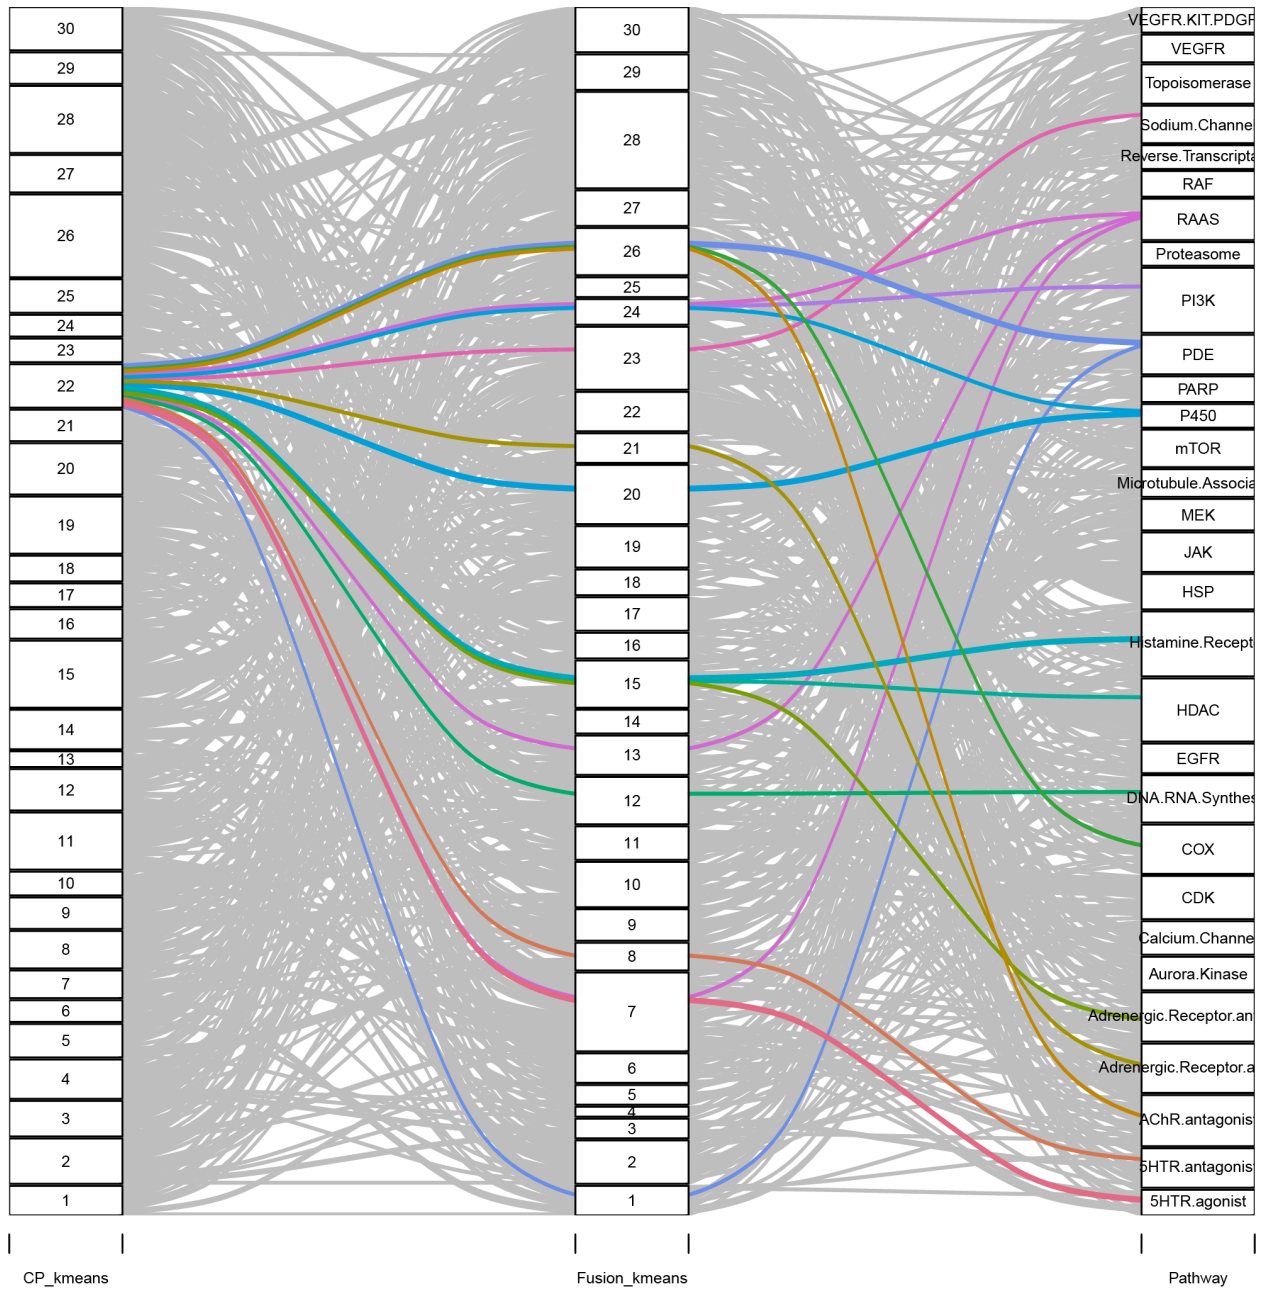

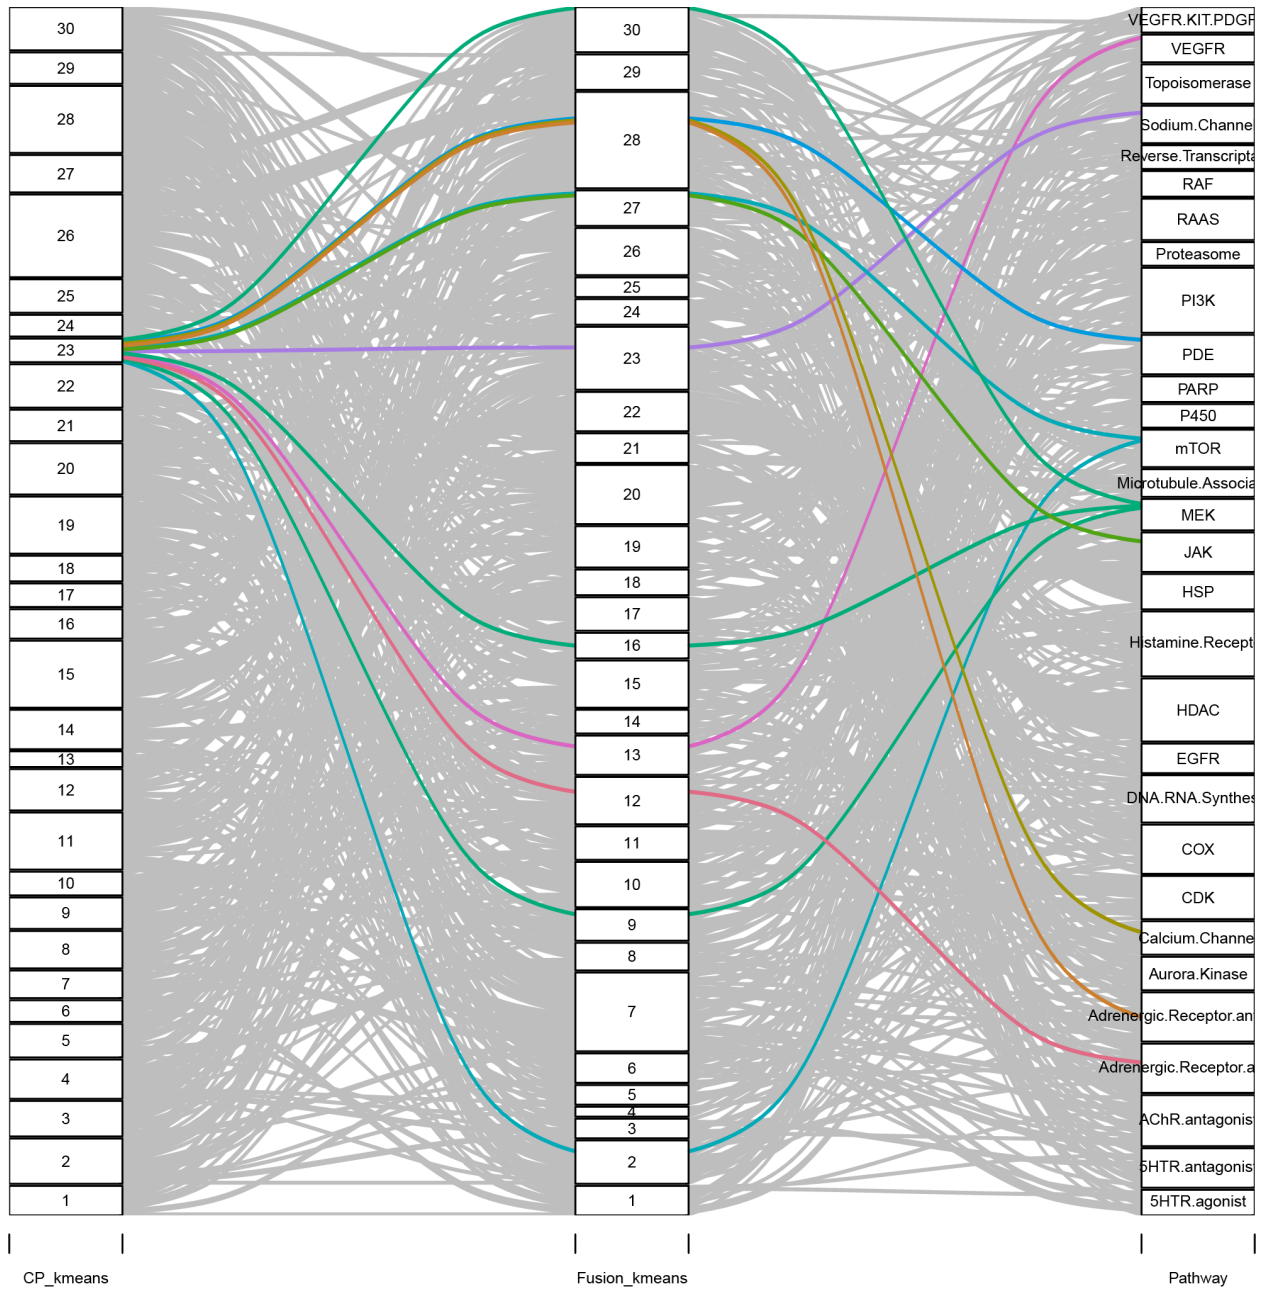

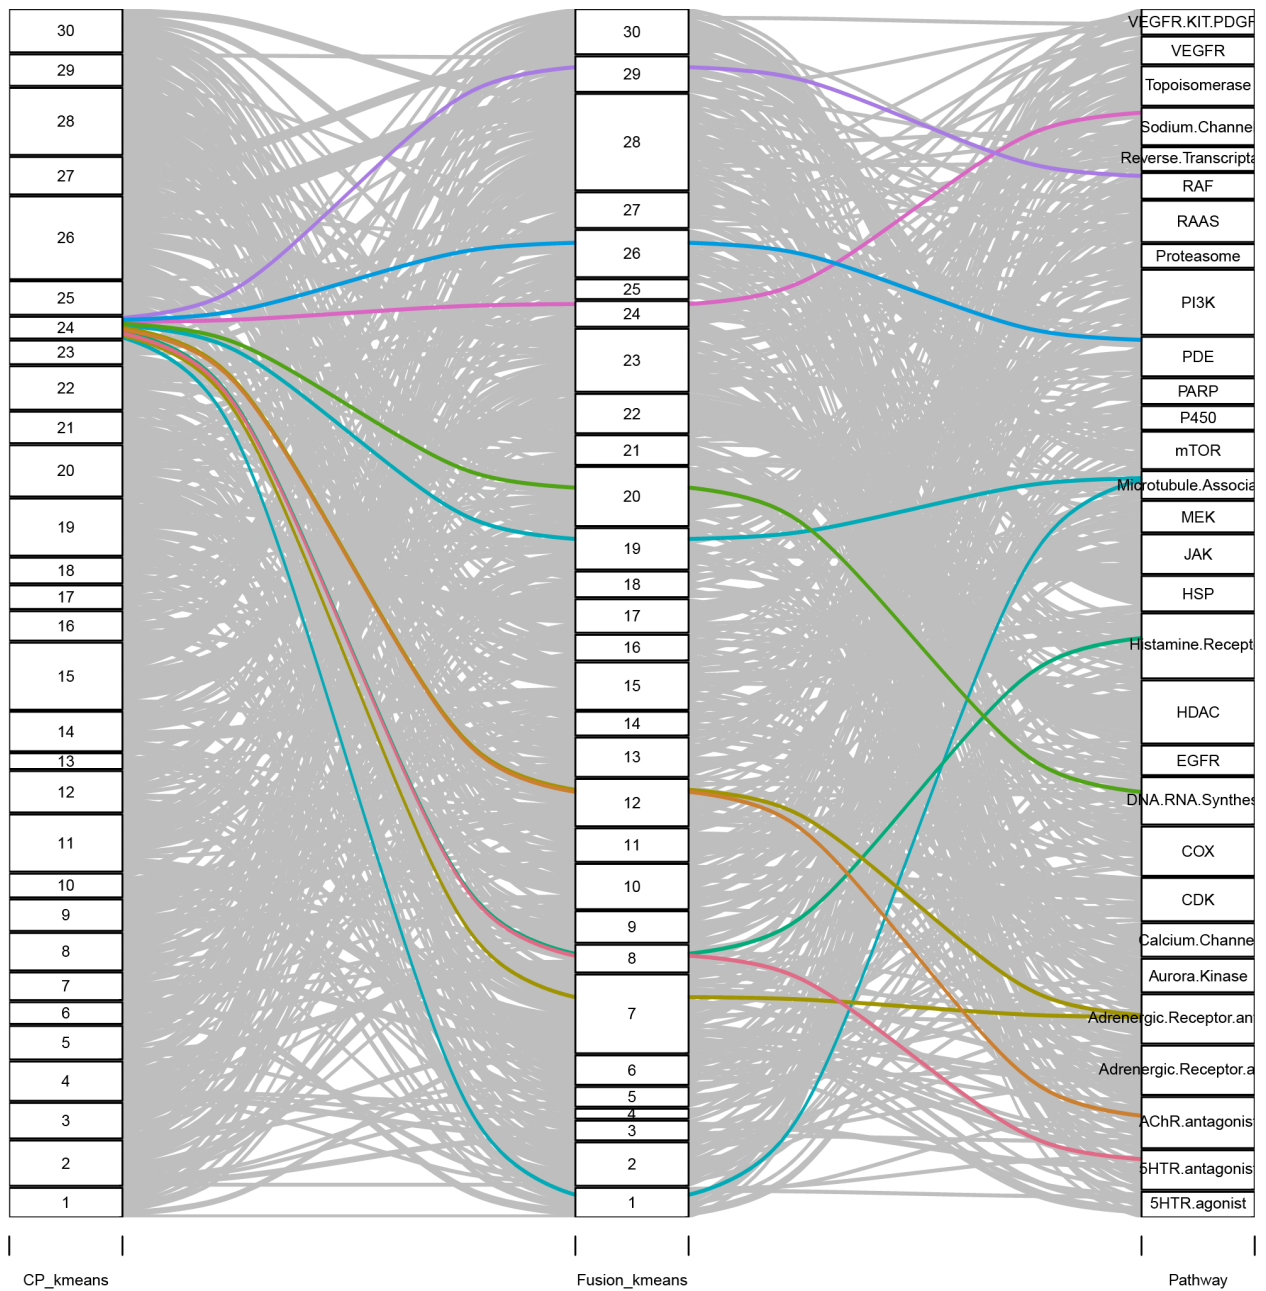

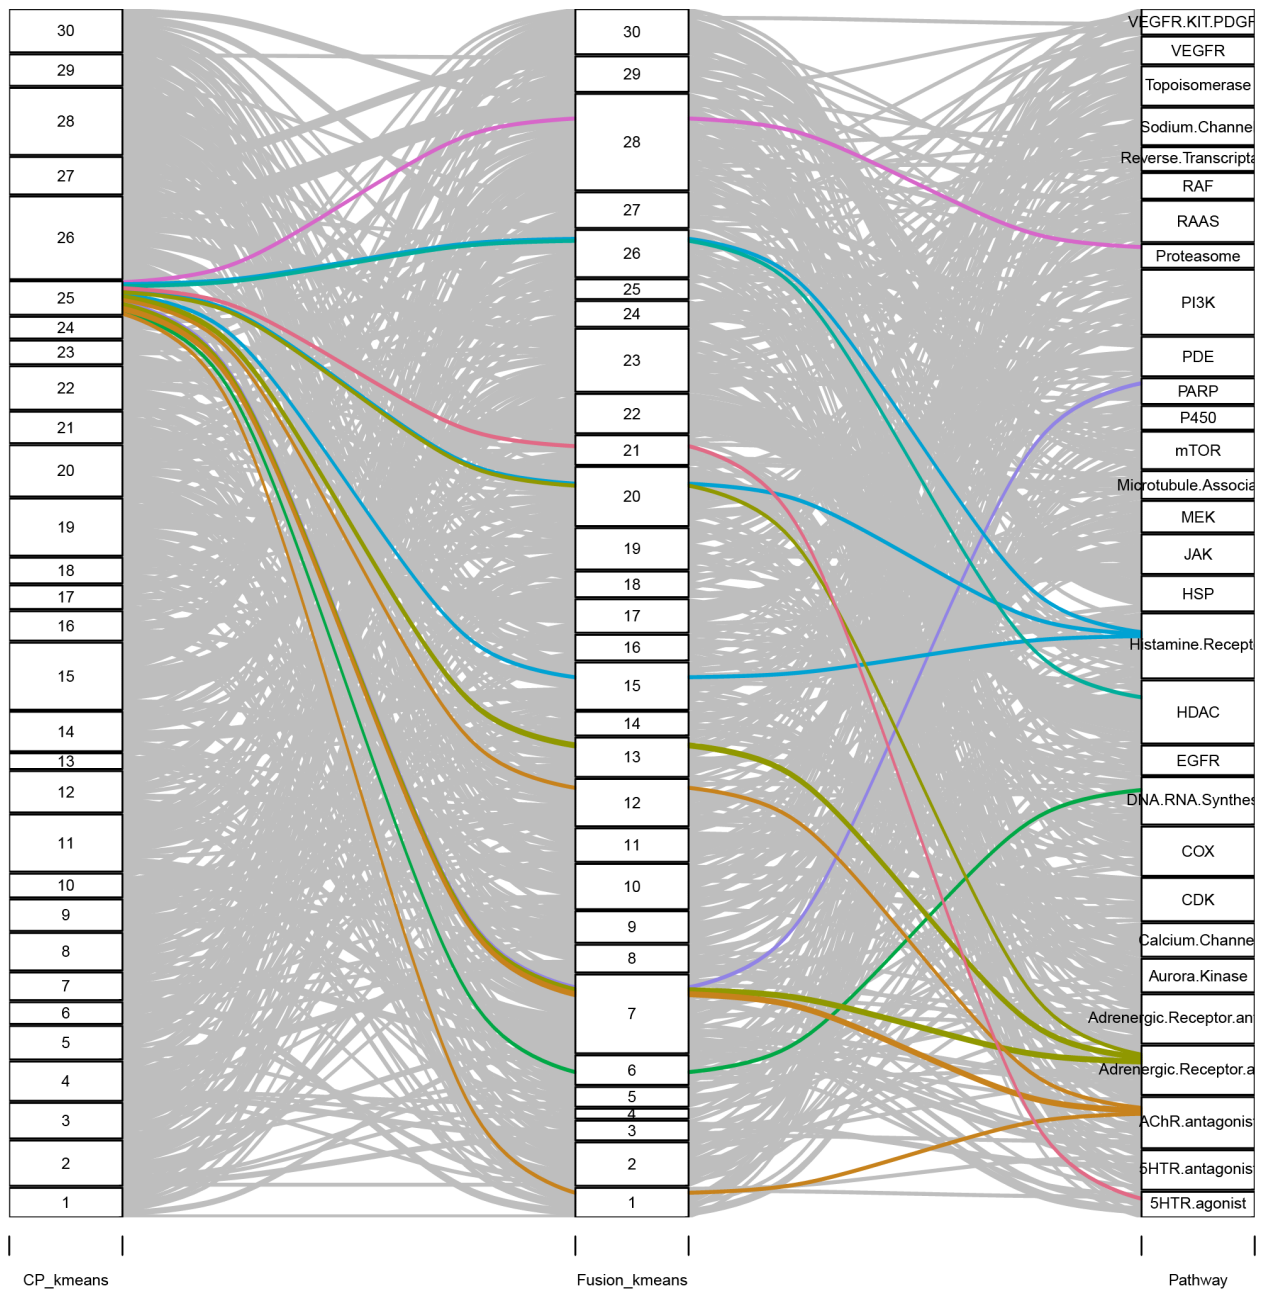

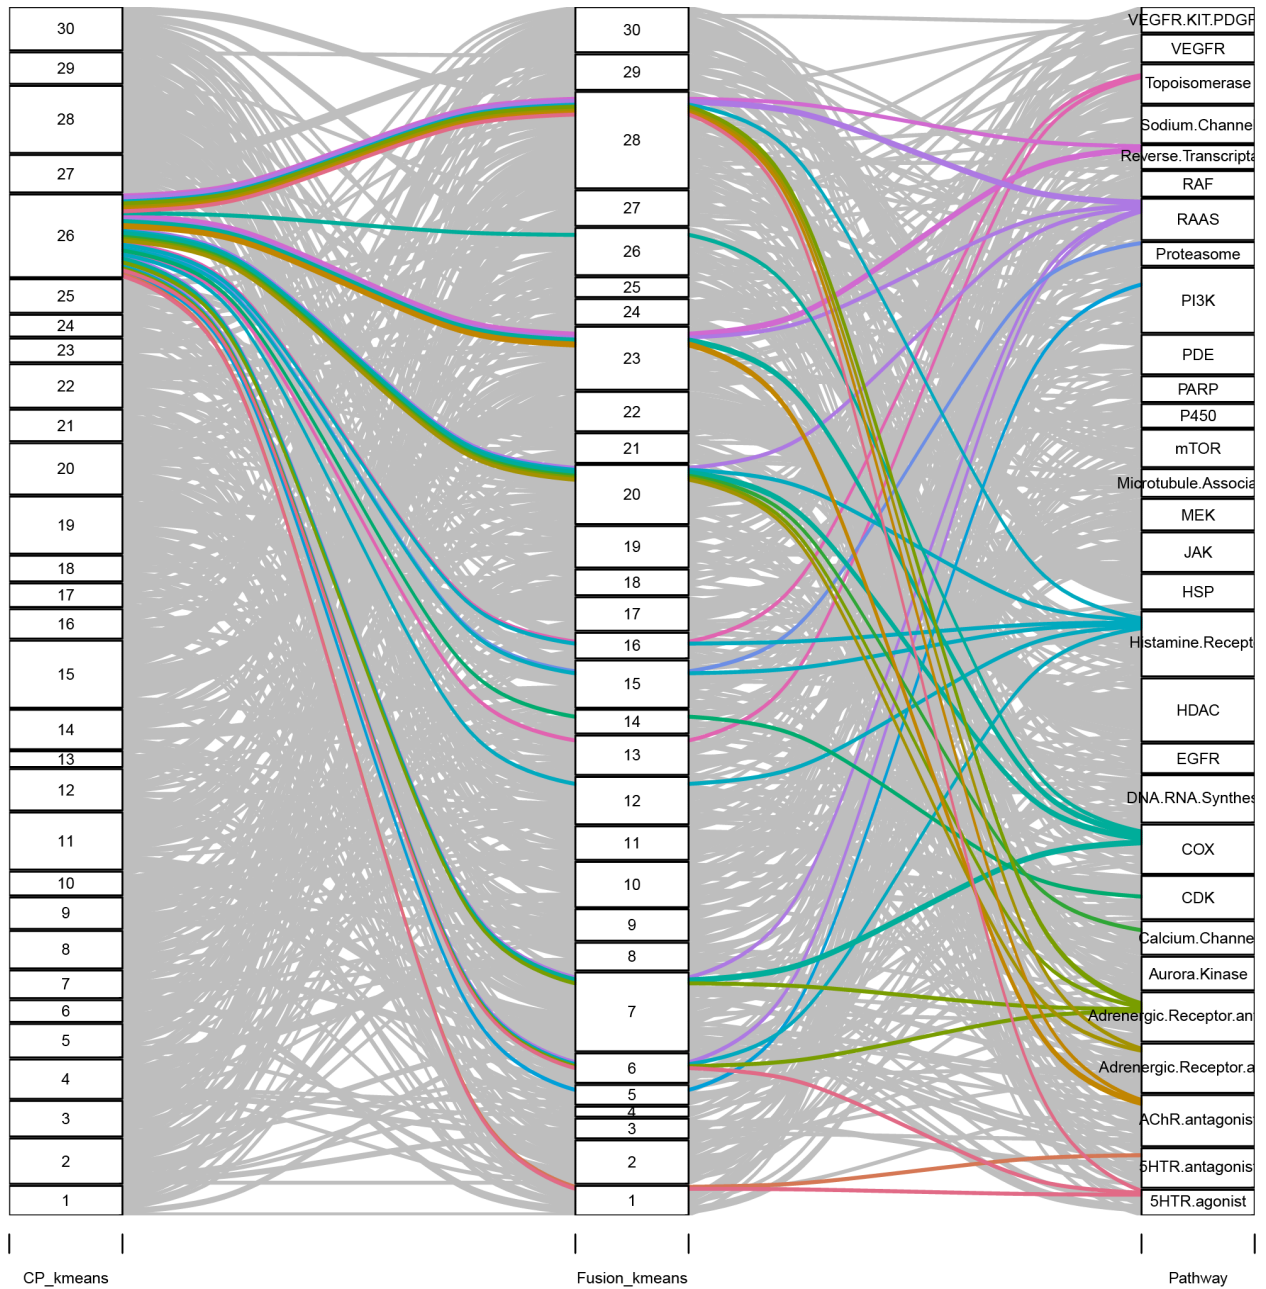

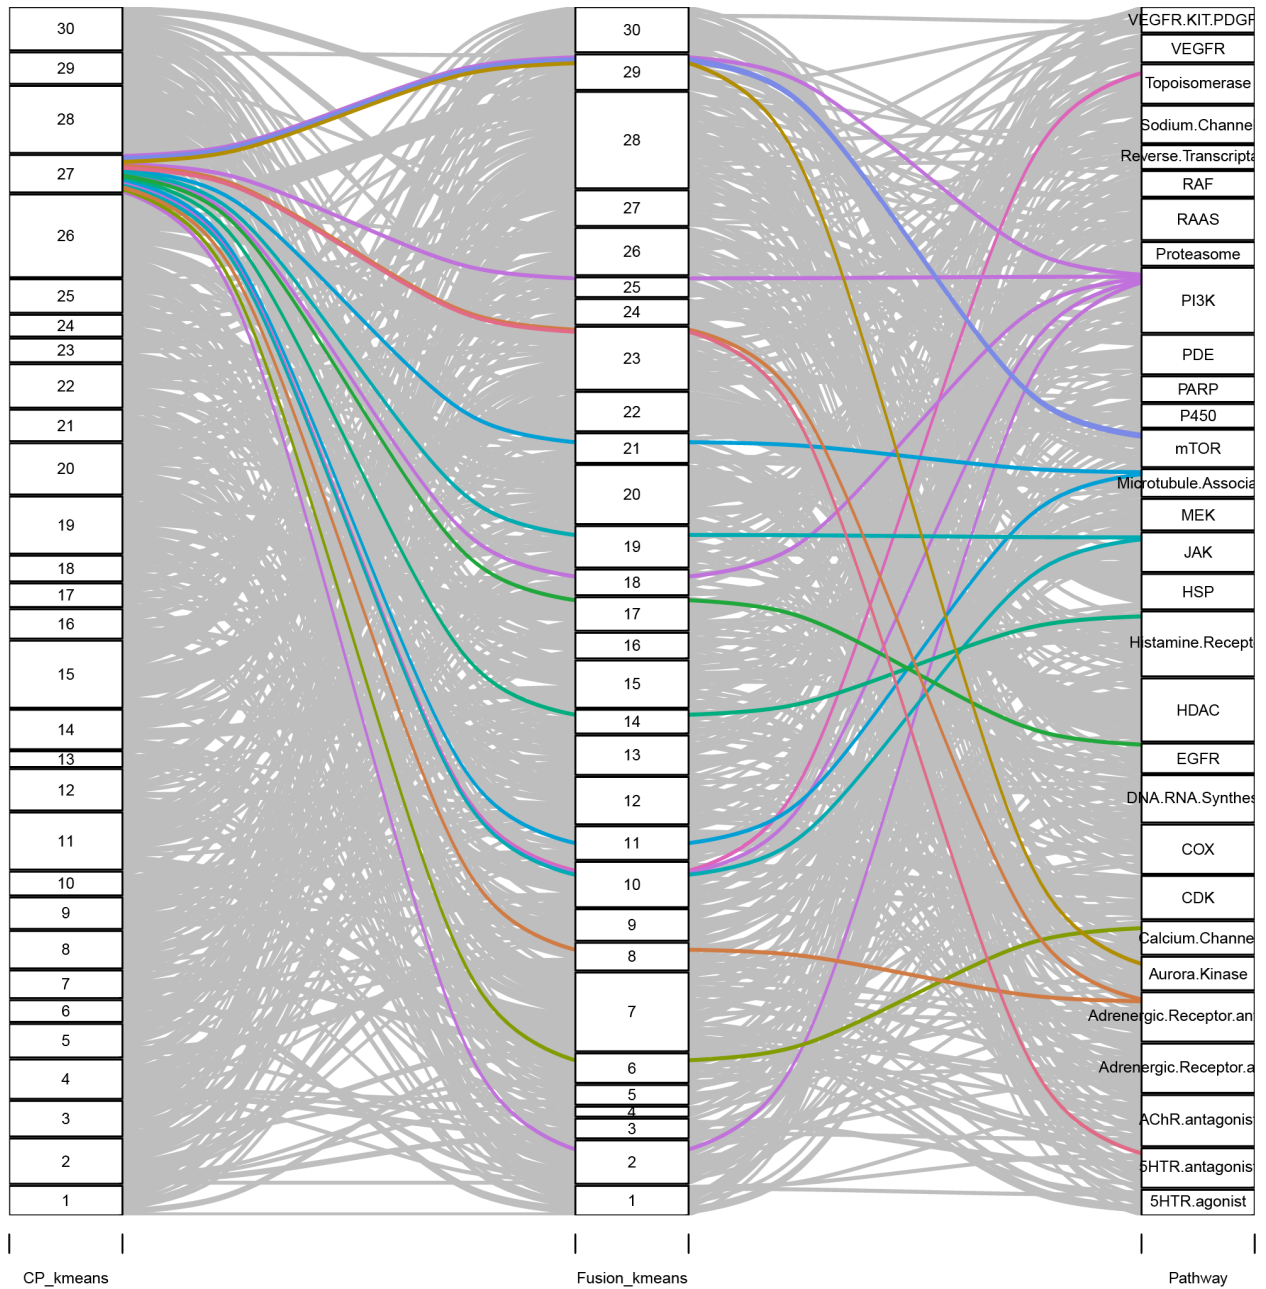



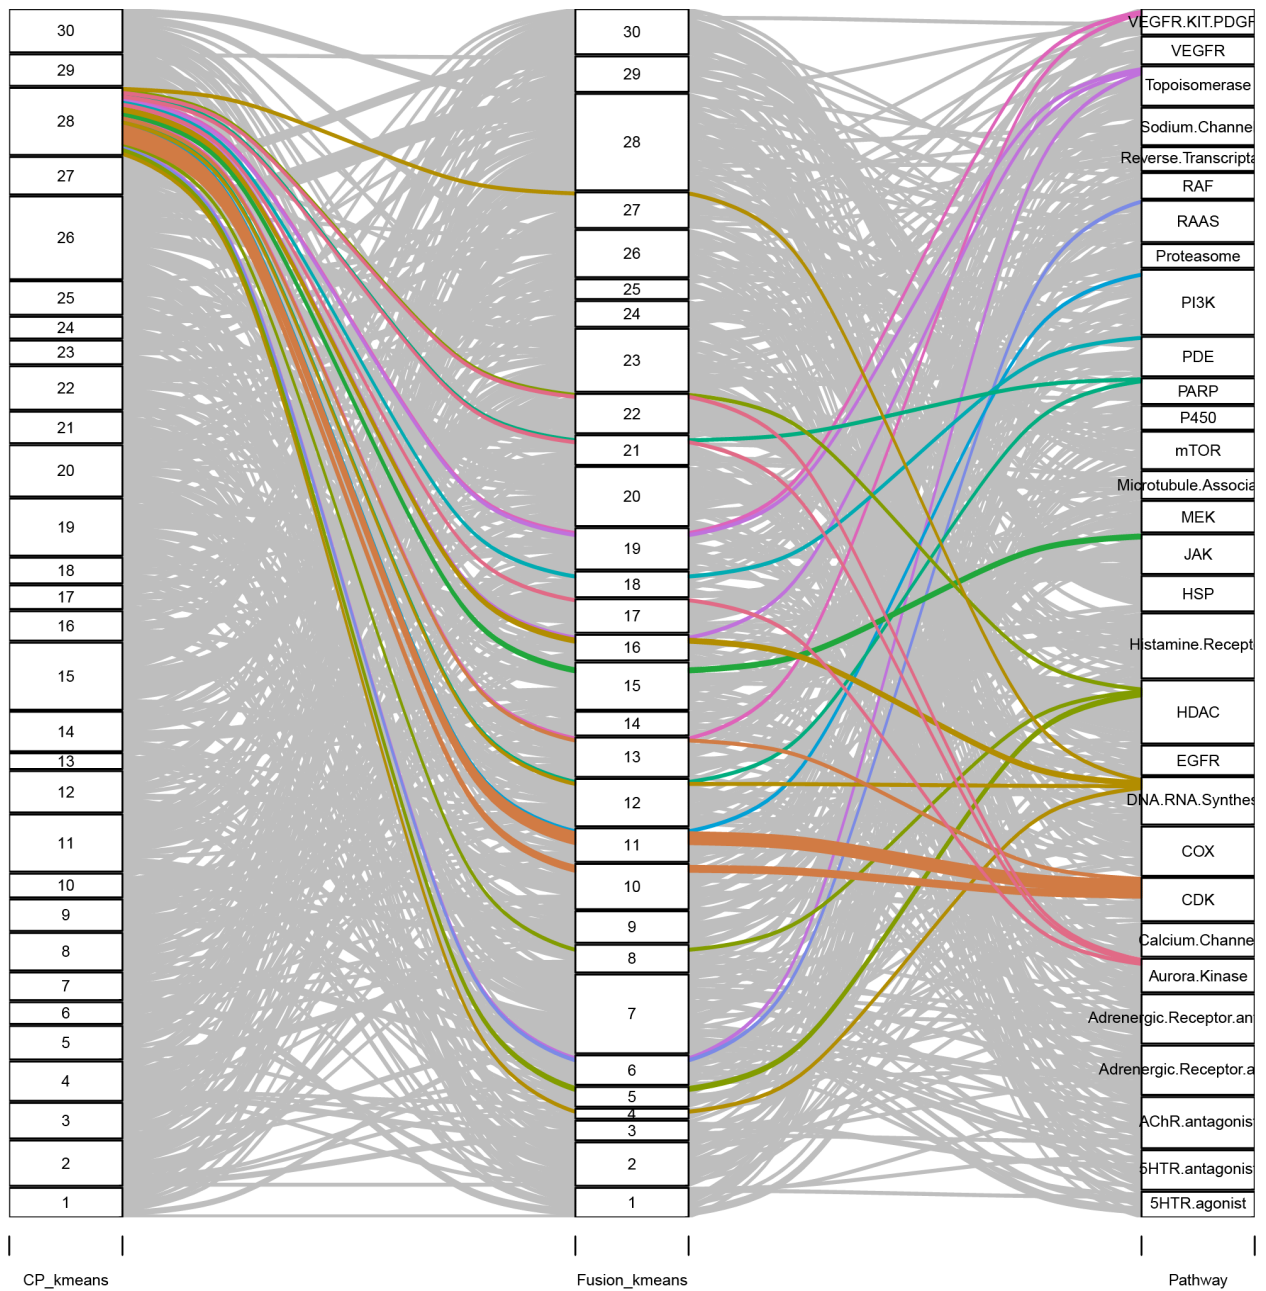

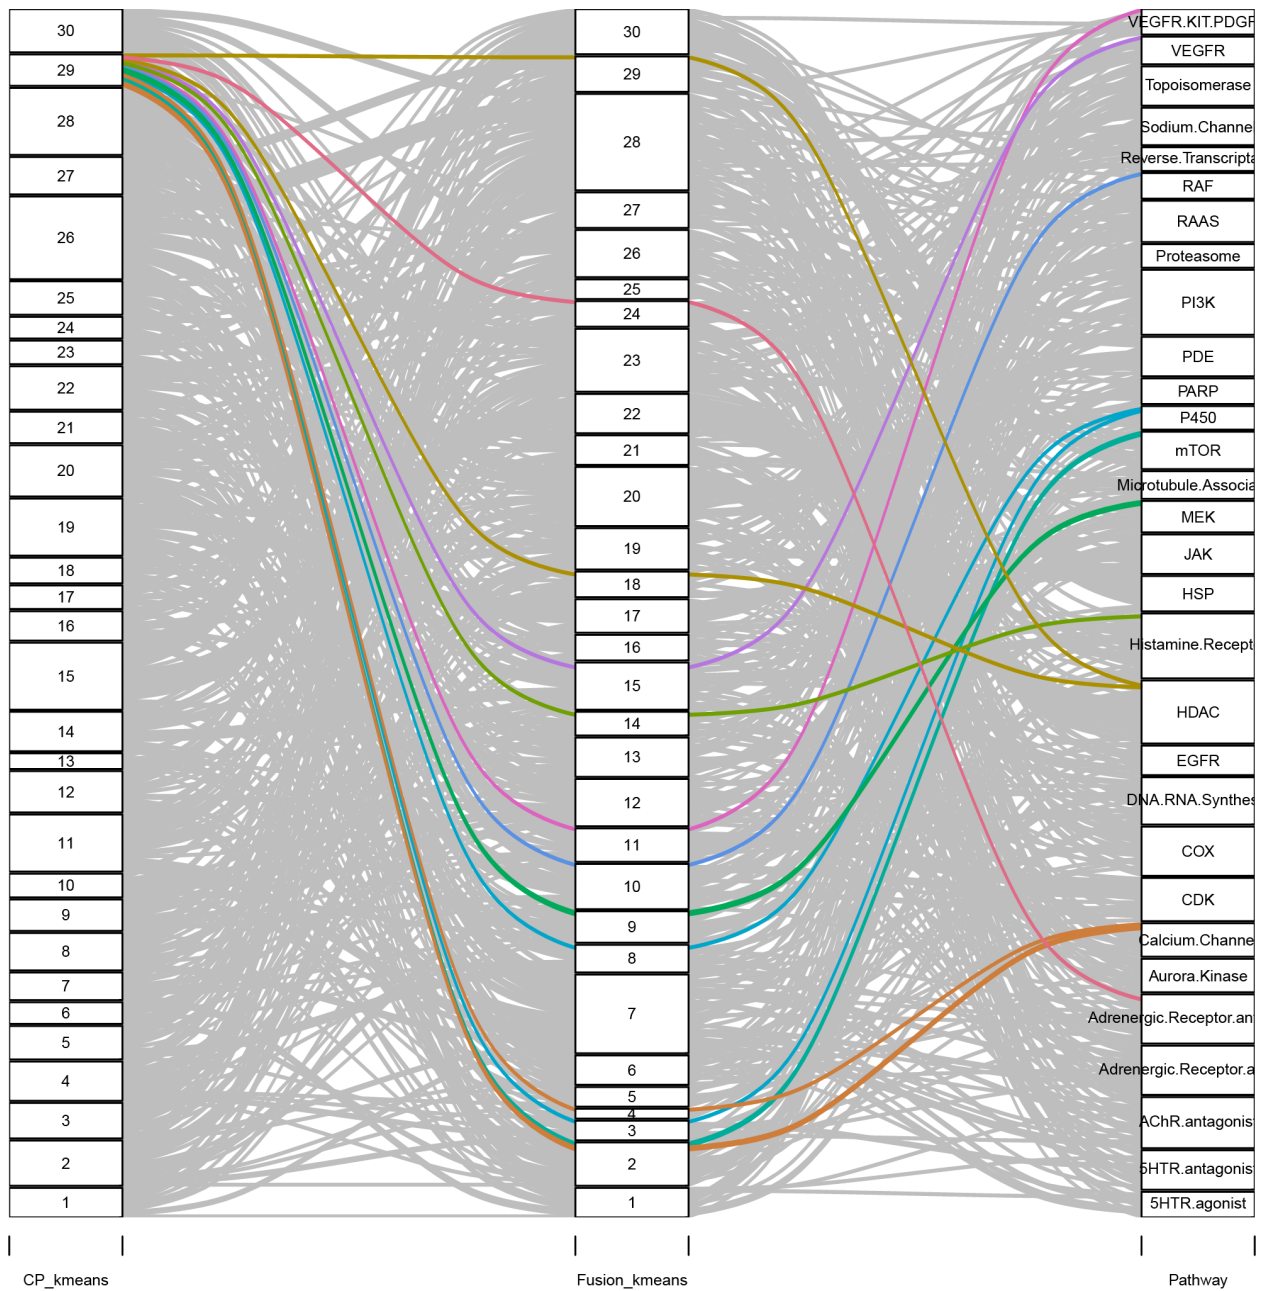

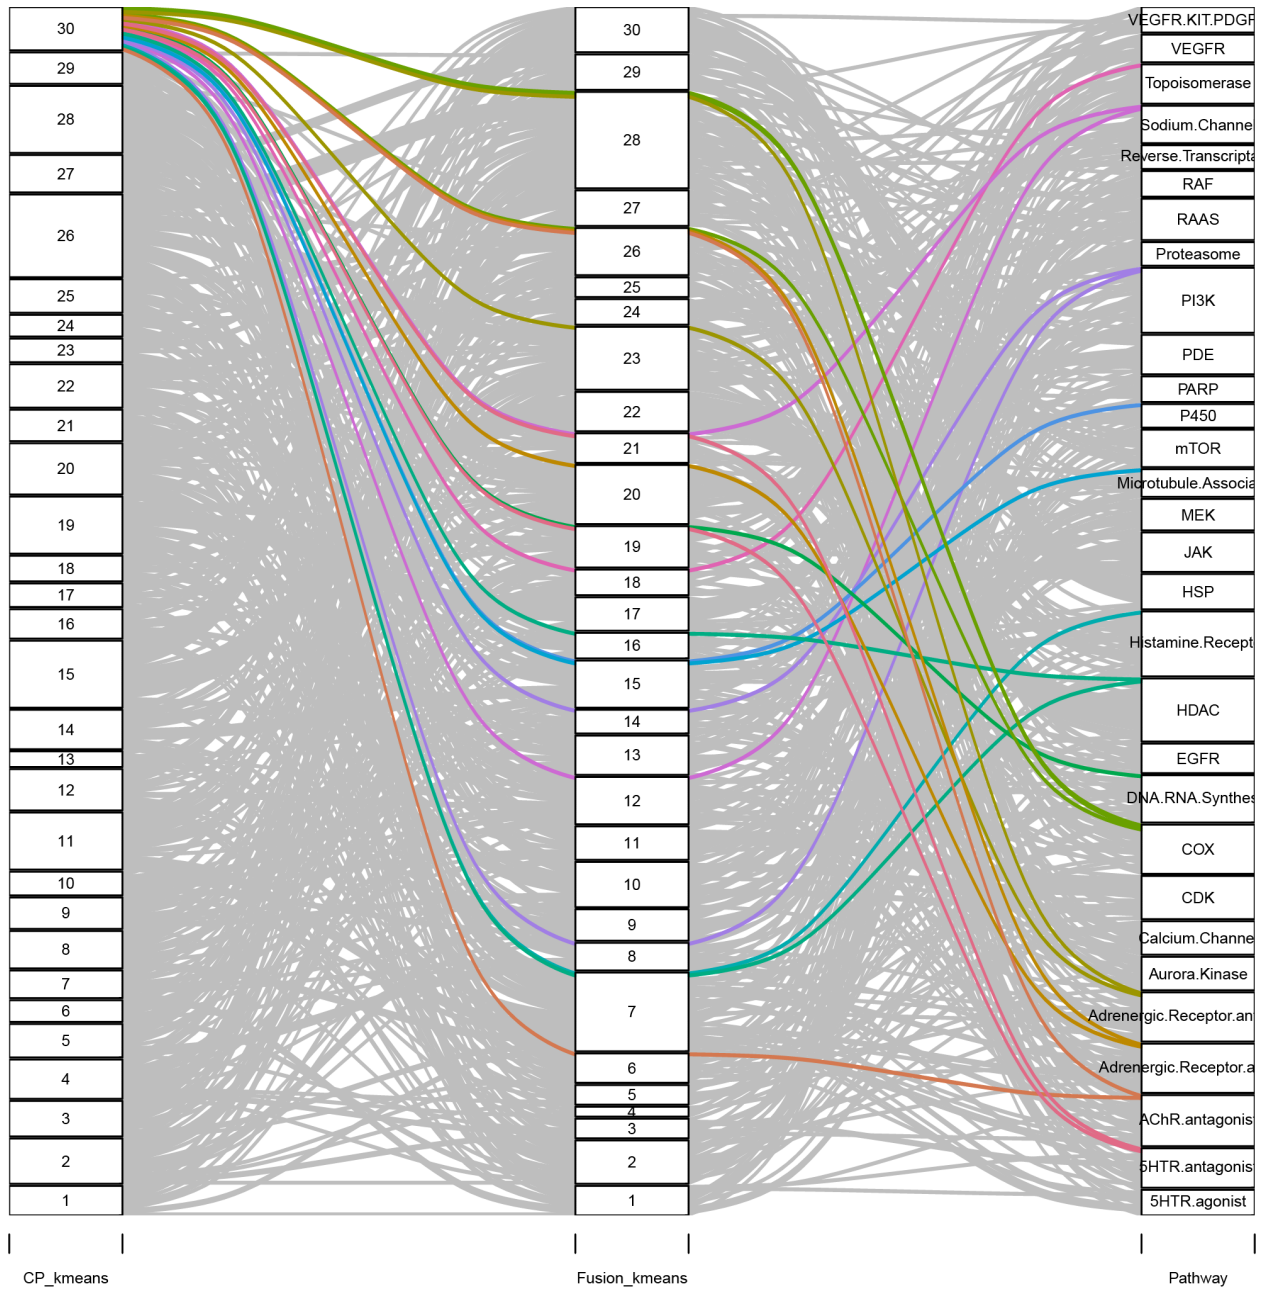

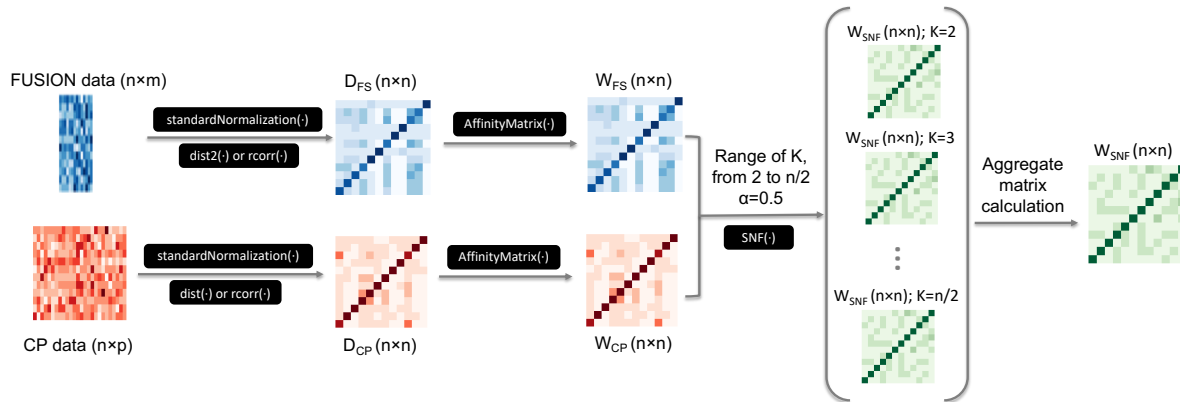

**Supplementary Figure 7: Adapted similarity network fusion workflow.**

All functions are from the SNFtool R package unless otherwise indicated. Normalized FUSION expression signatures and CP fingerprints are subjected to Z-score transformation by the standardNormalization function, followed by similarity matrix calculation using either the dist2 function for Euclidean Distance, or distanceMatrix function (ClassDiscovery package) for Pearson distance. Affinity matrices were then calculated by the AffinityMatrix function. Similarity network fusion ( $K$ =number of neighbors,  $\alpha$ =hyperparameter) is applied to  $W_{FS}$  and  $W_{CP}$  across a range of  $K$  values from 2 to  $n/2$  to generate a set of  $W_{SNF-K}$  matrices. An aggregate matrix is then calculated as described in Supplemental Note 4.

**a**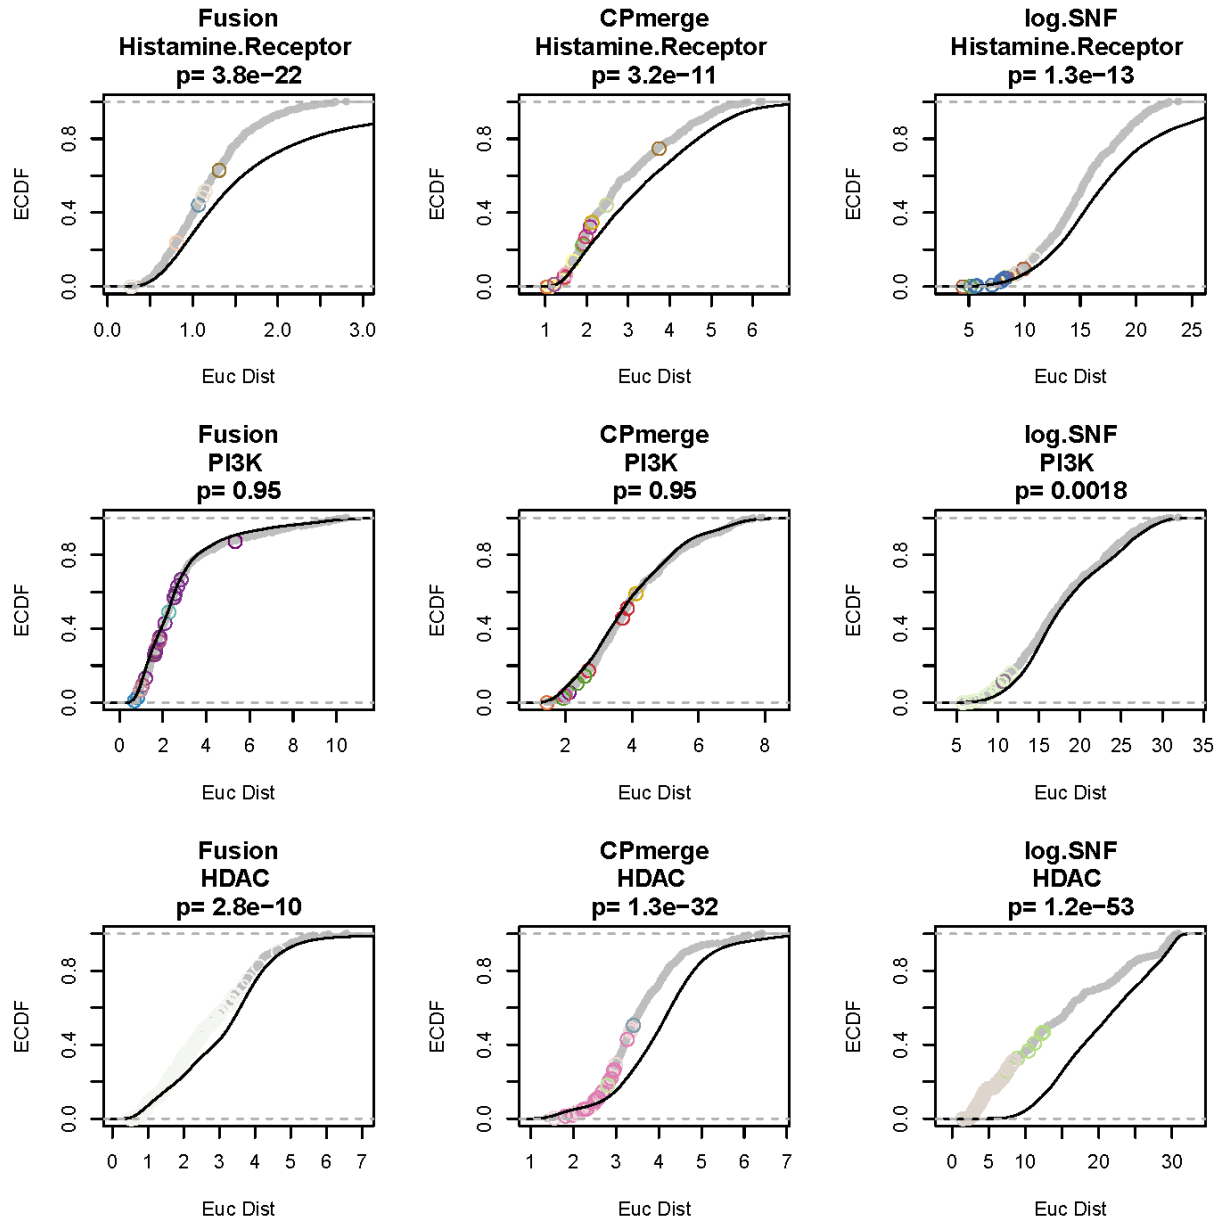

**Supplementary Figure 8: CDF plots comparing pairwise associations between in-class and out-of-class associations.** In-class-associations are colored in gray, with colored circles corresponding to cluster membership in the associated APC maps. Out-of-class associations are colored in black. KS-test p-values are shown above each plot. (a) CDF plots comparing pairwise Euclidean distances and (b) pairwise Pearson correlations.

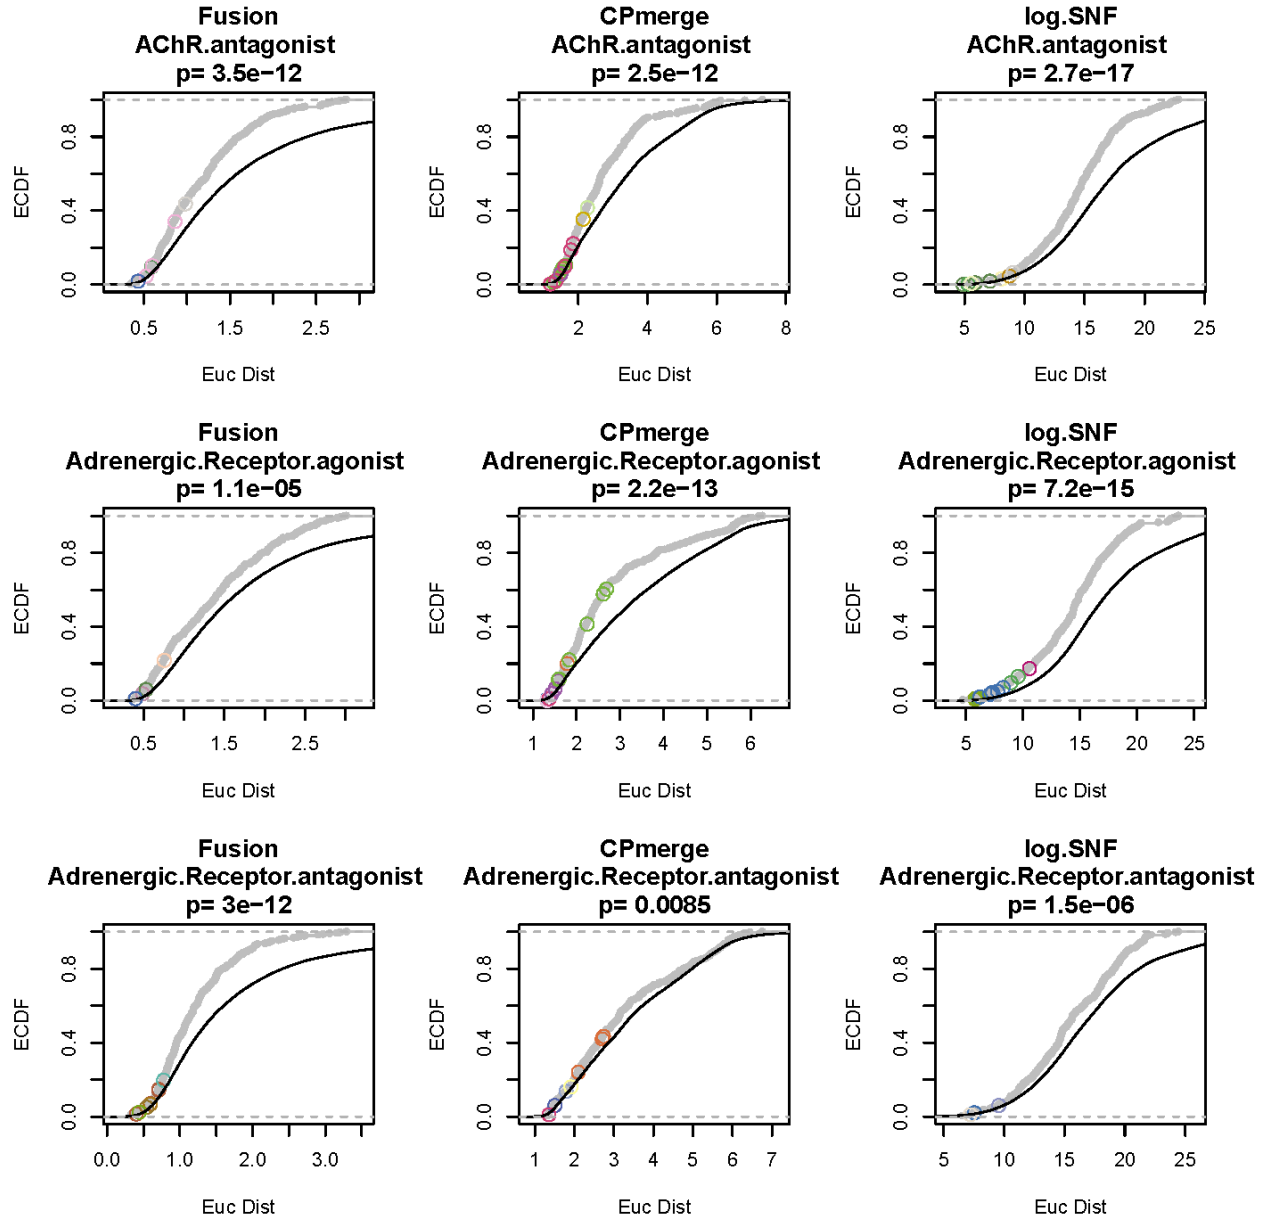

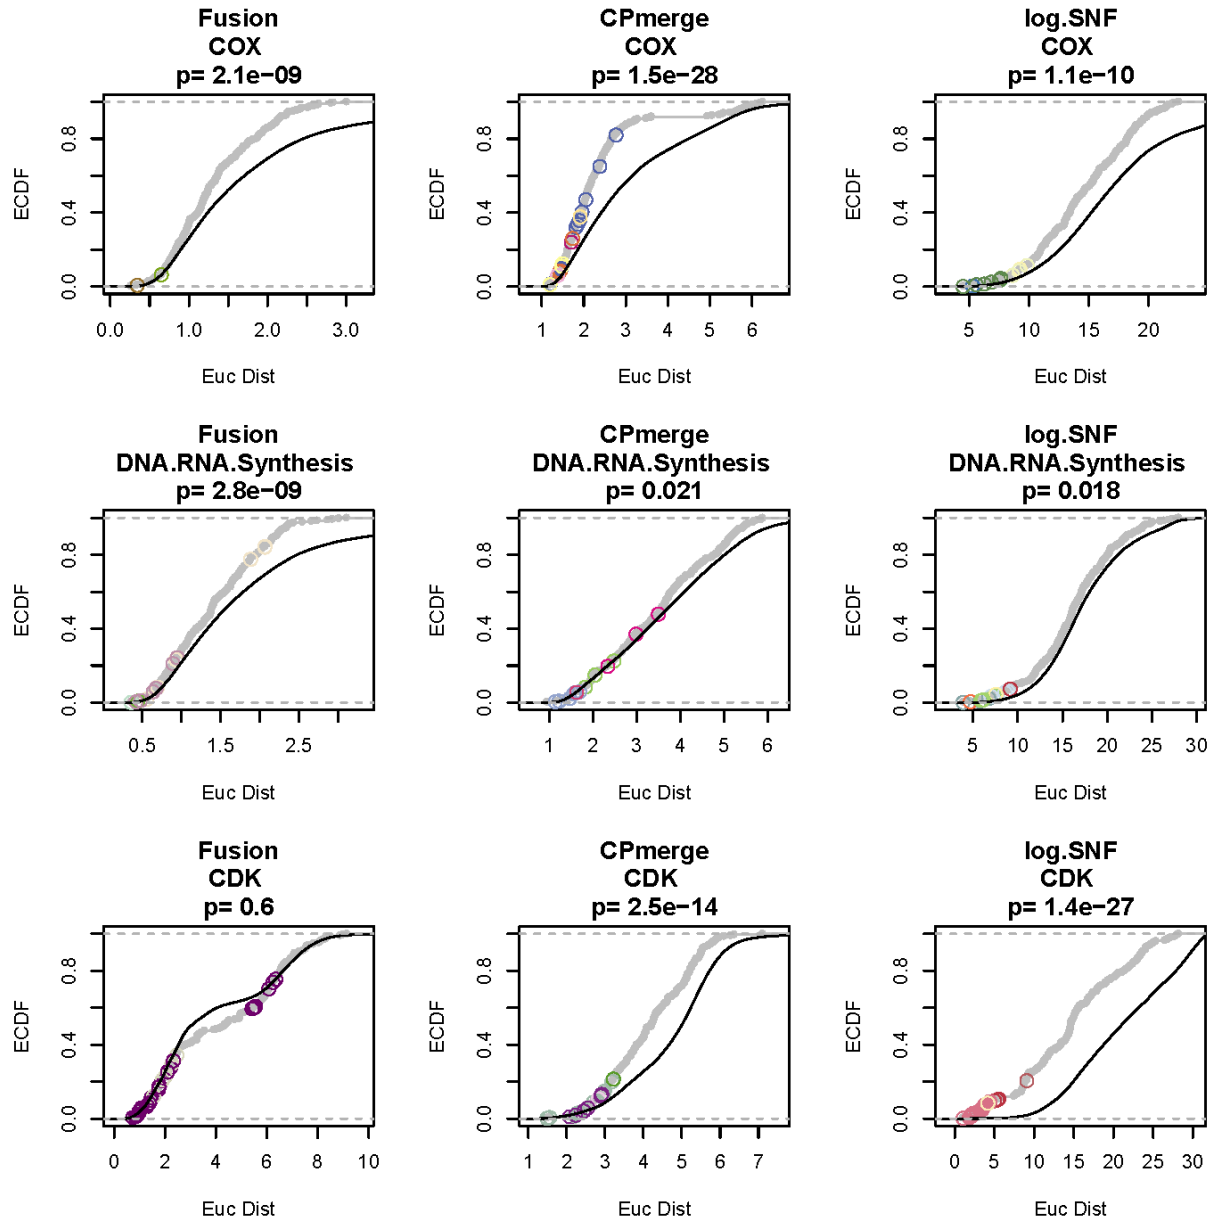

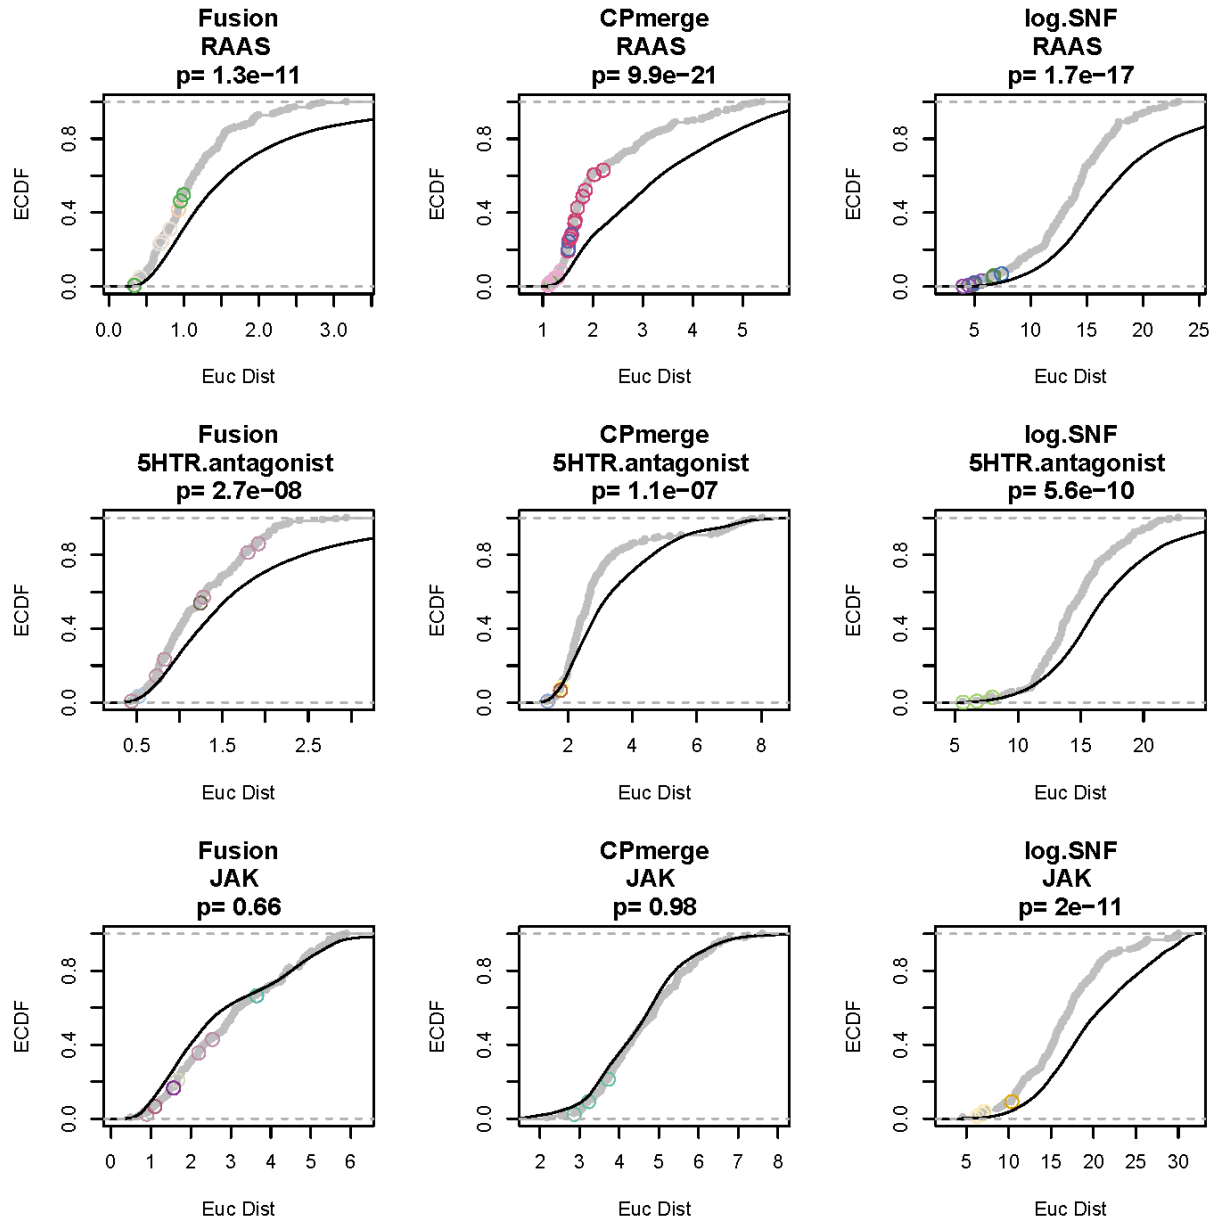



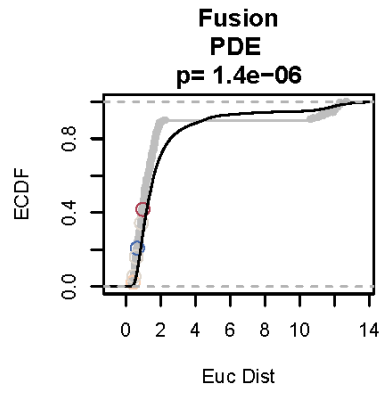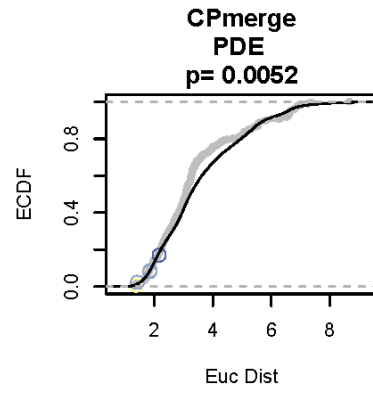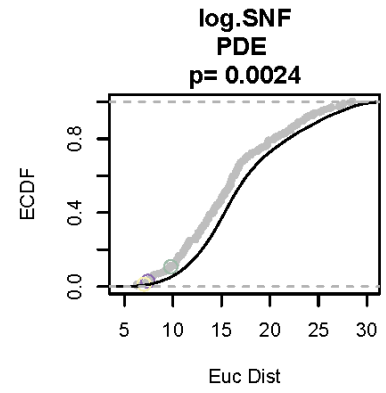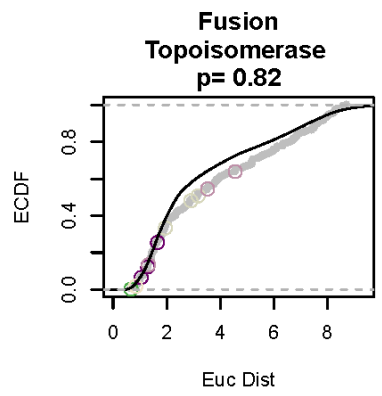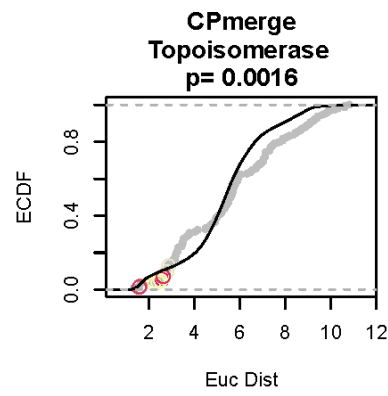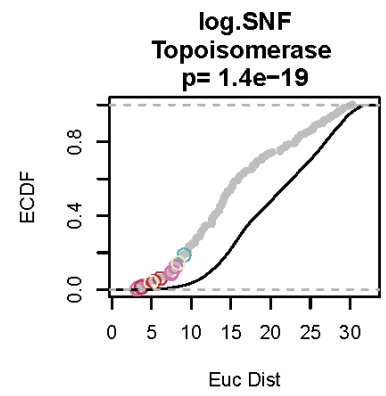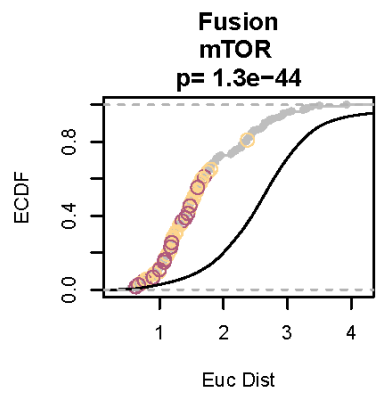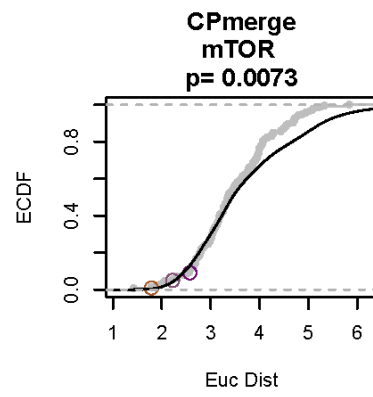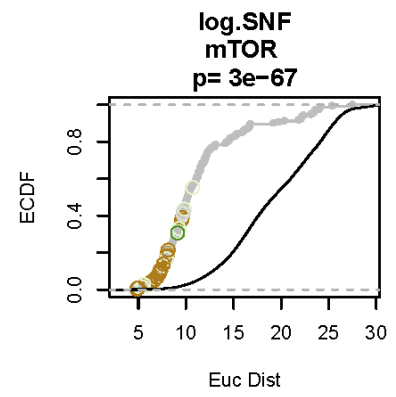

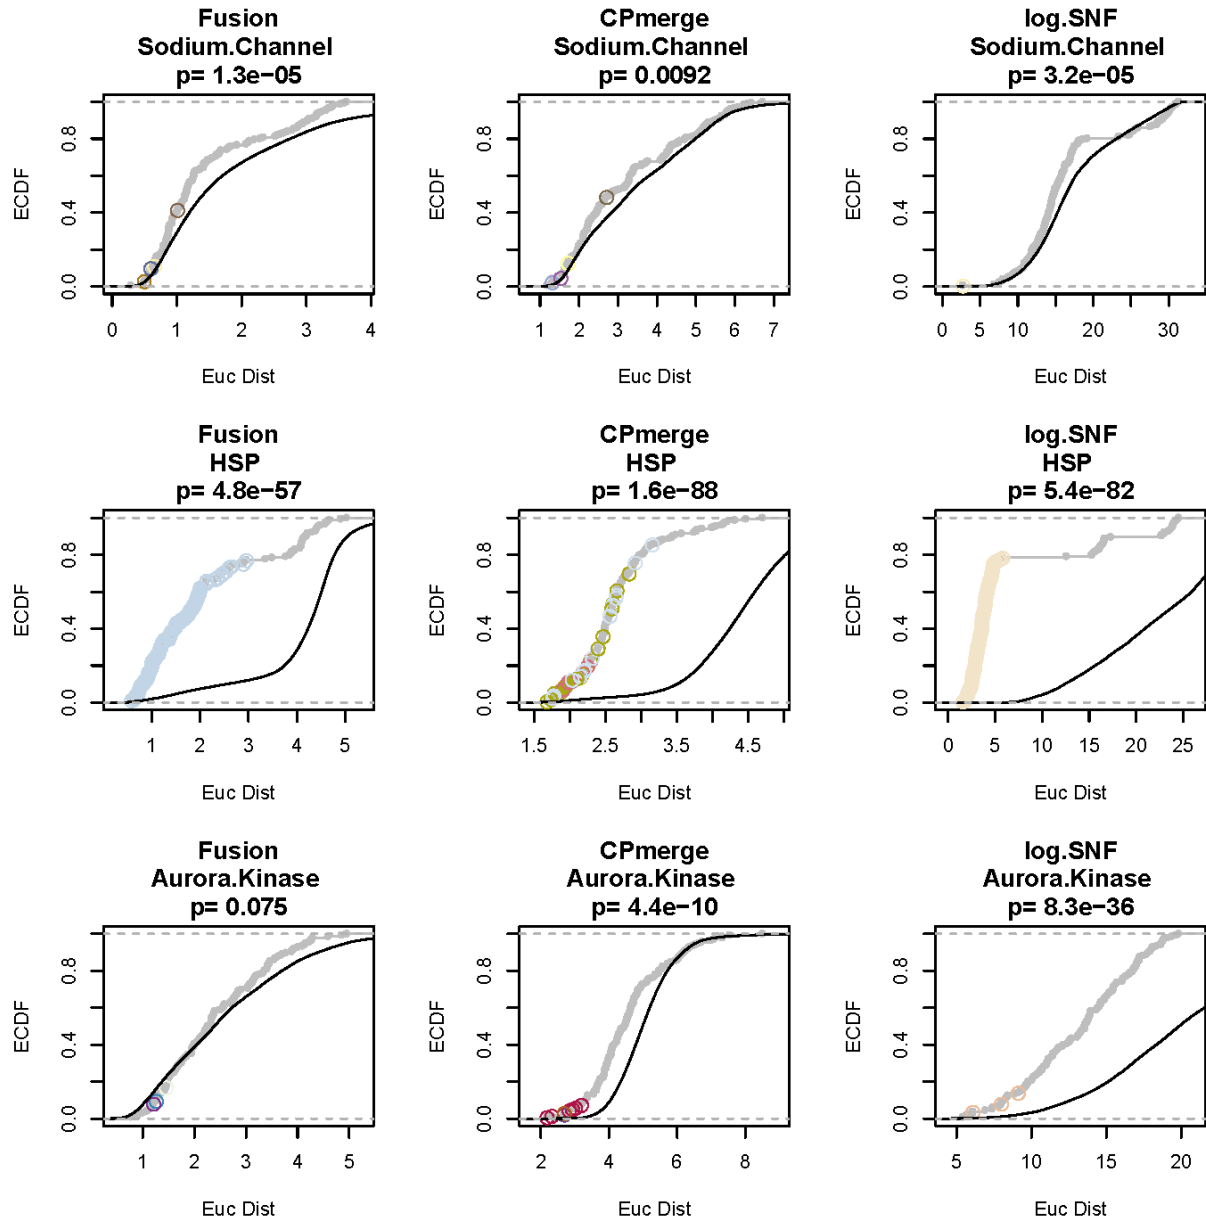

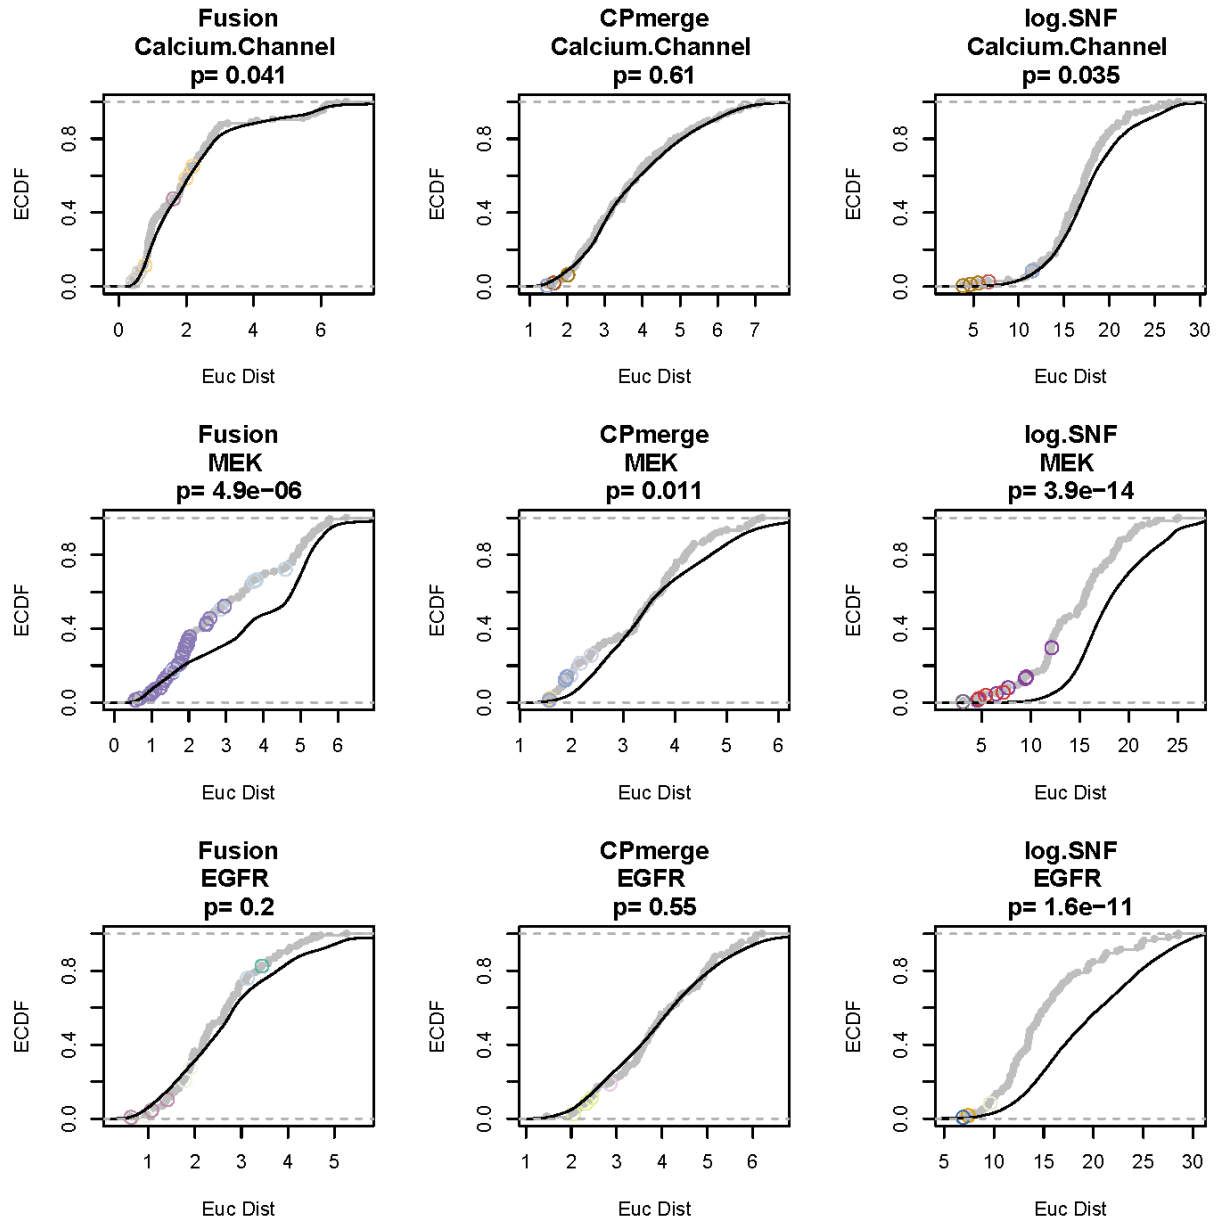

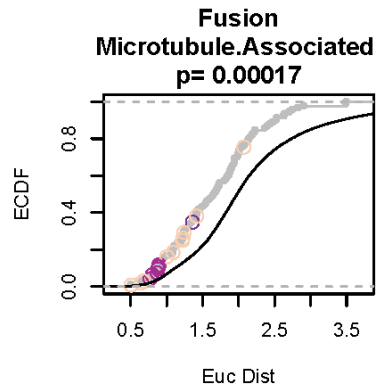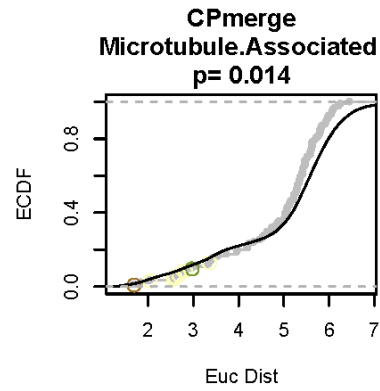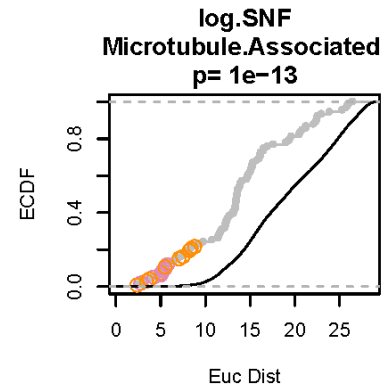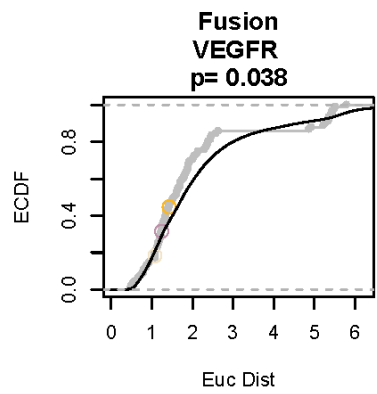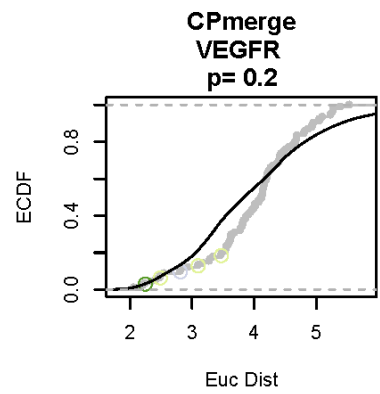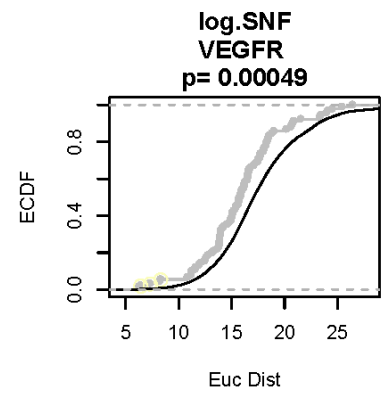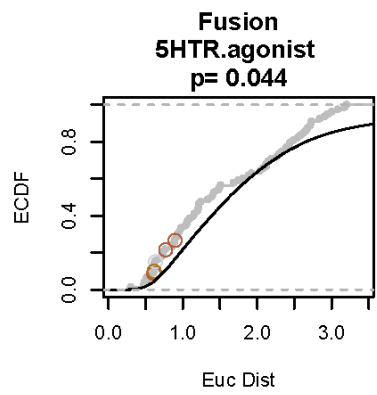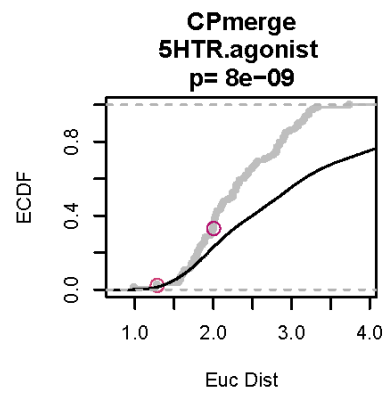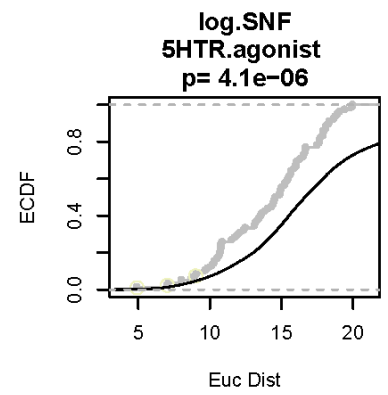

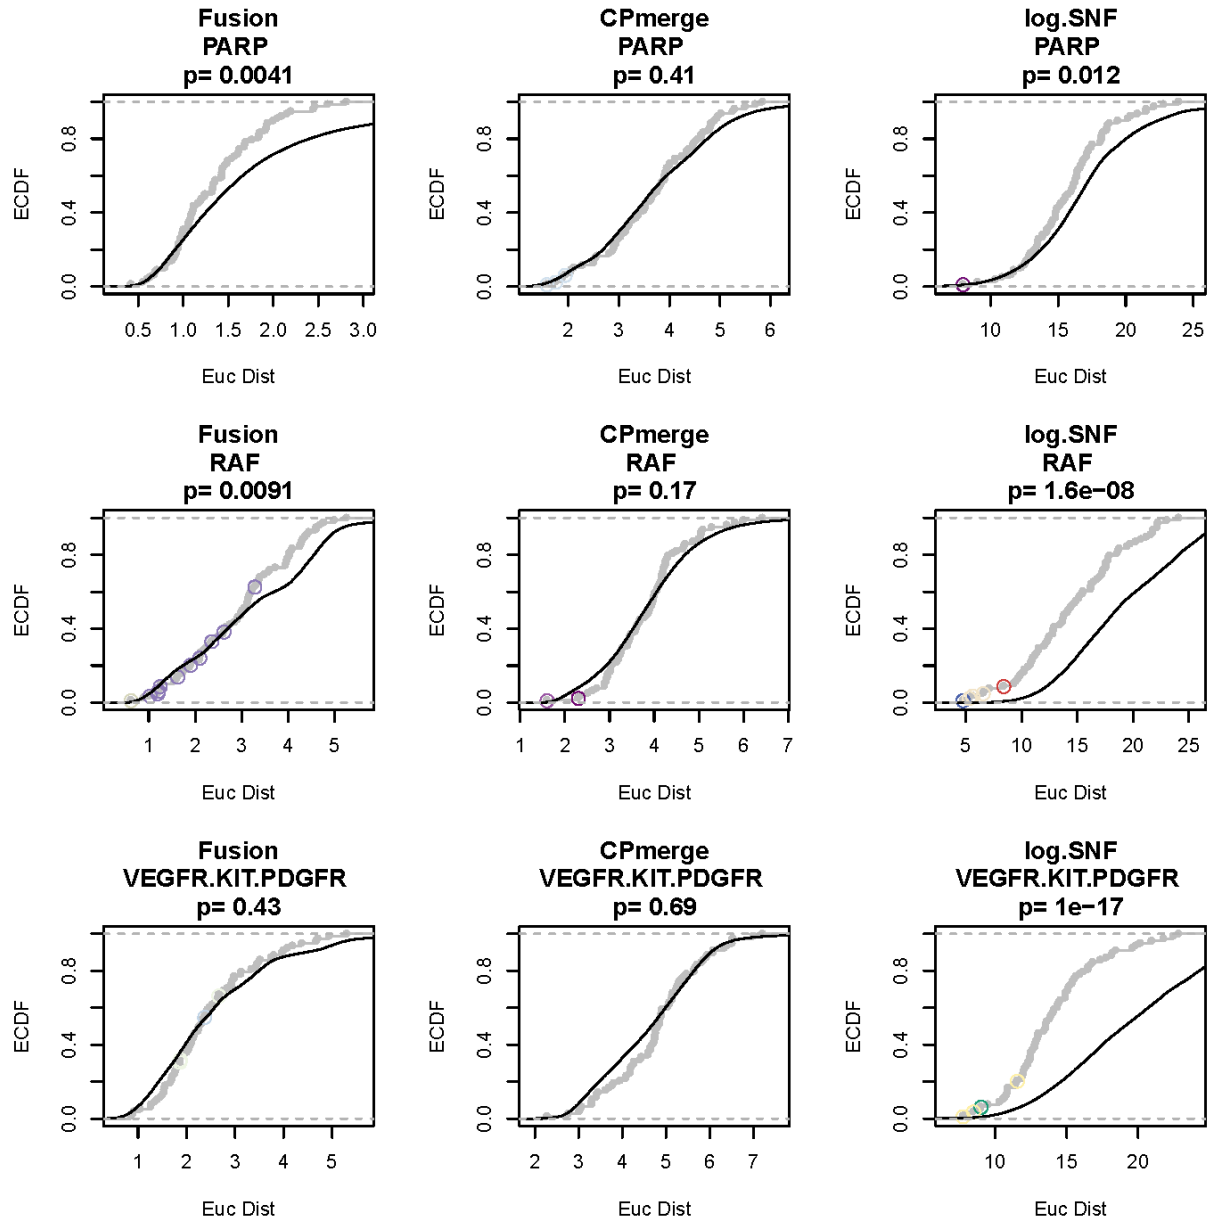

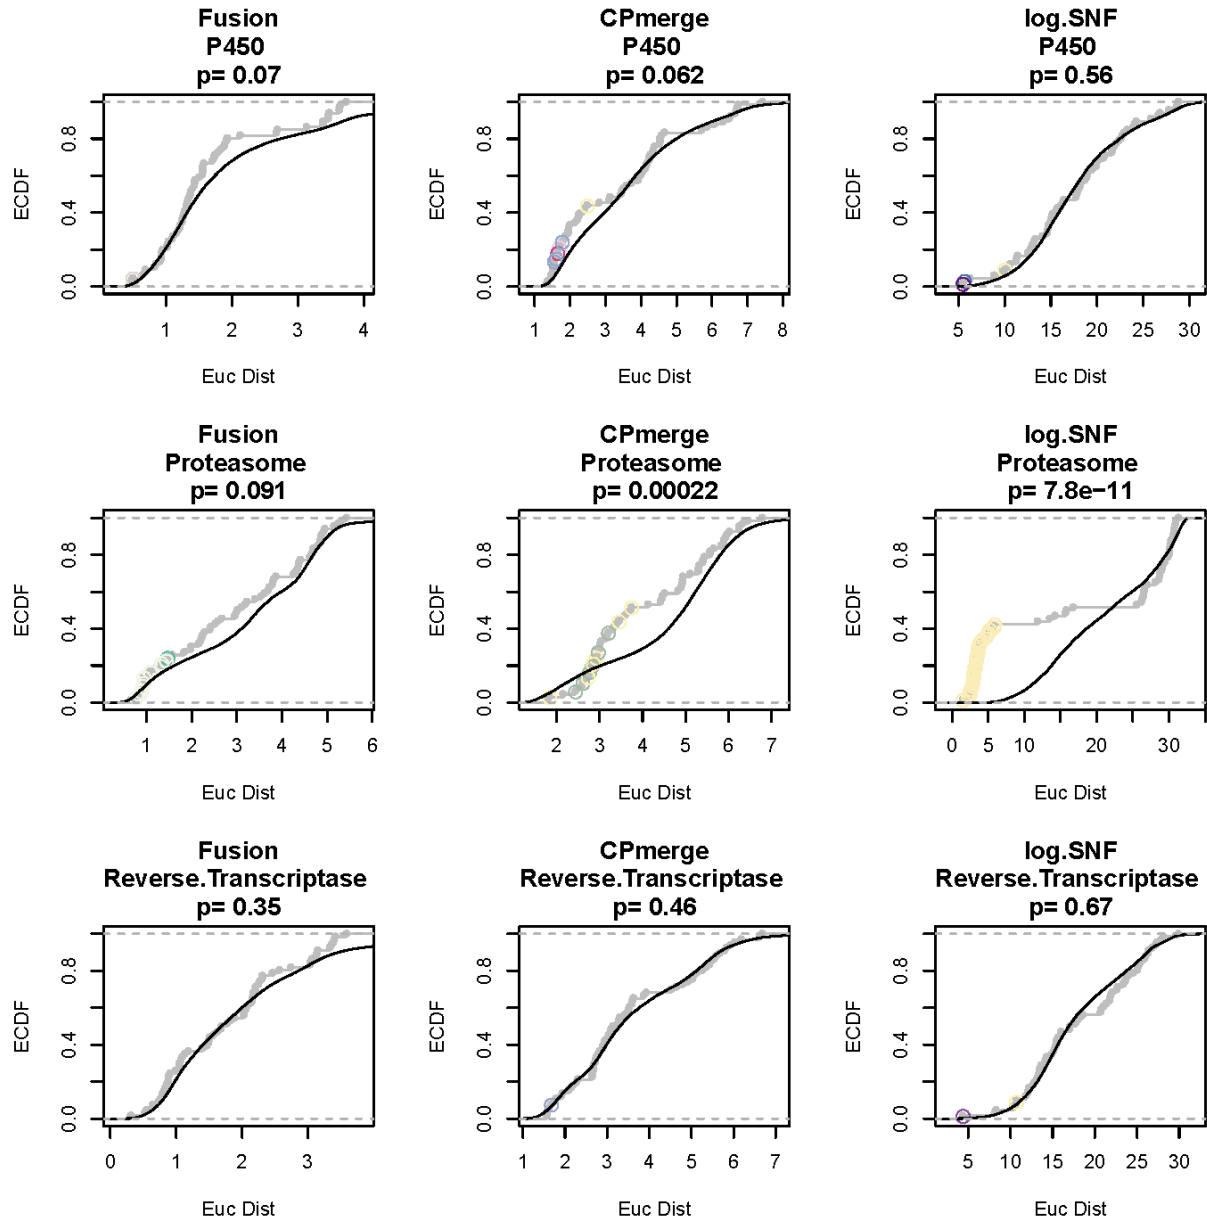

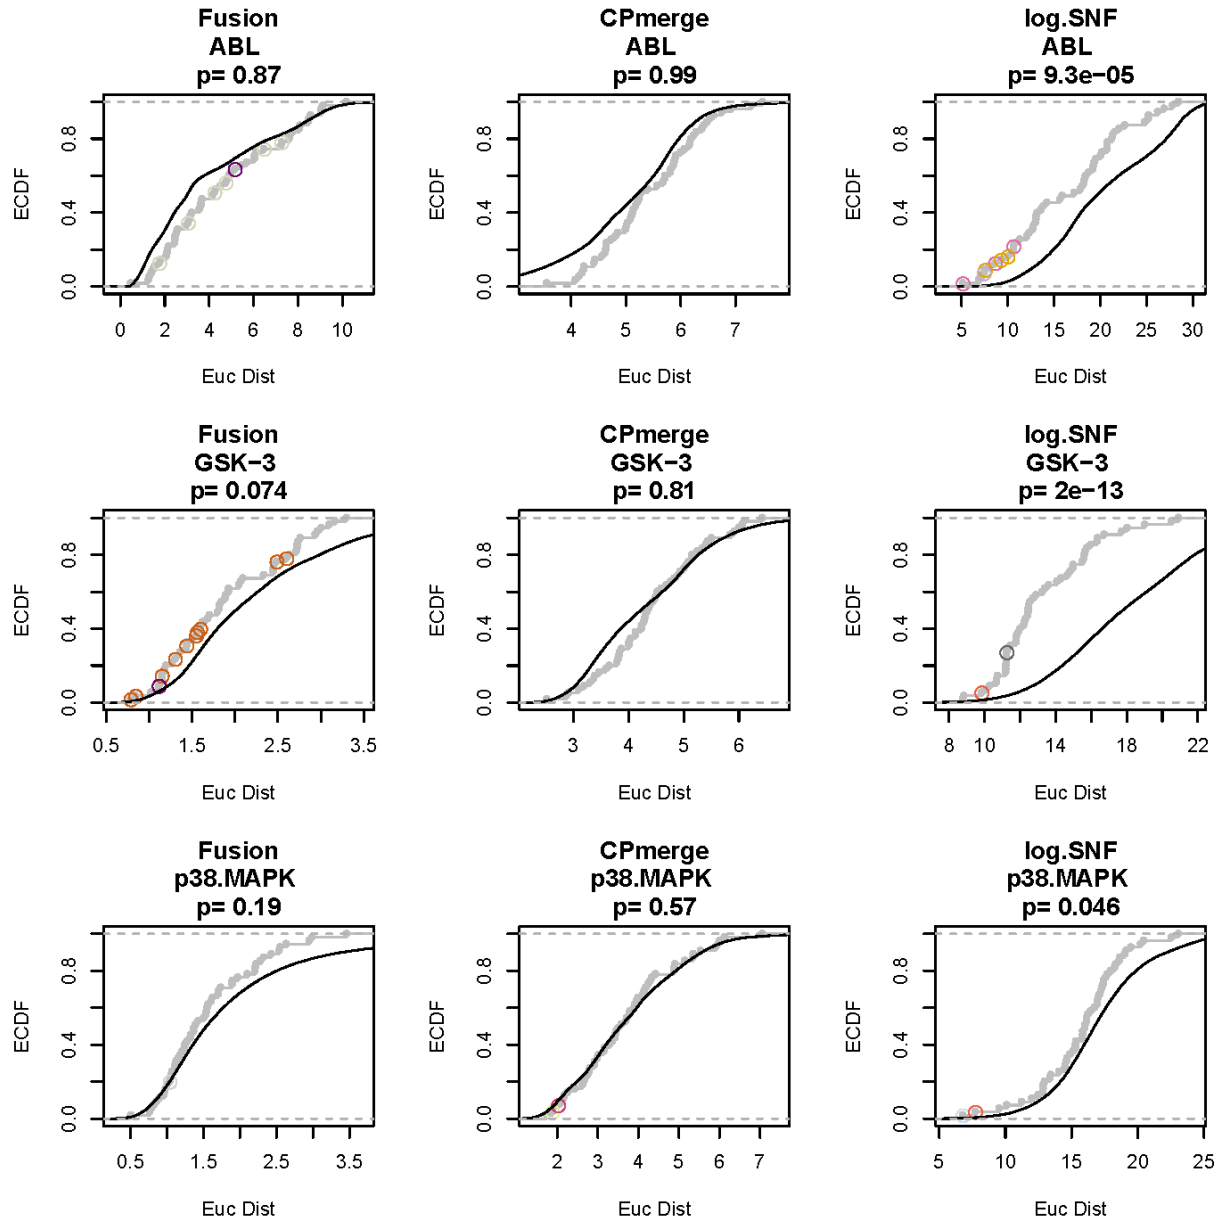

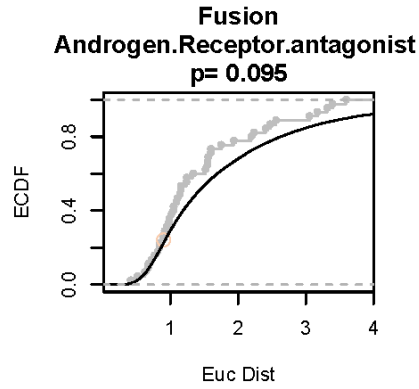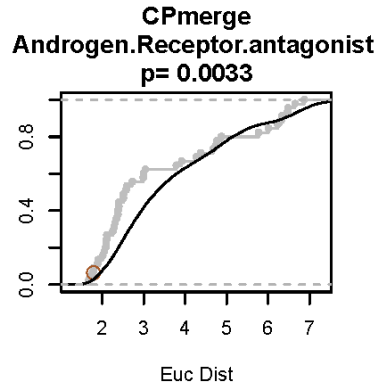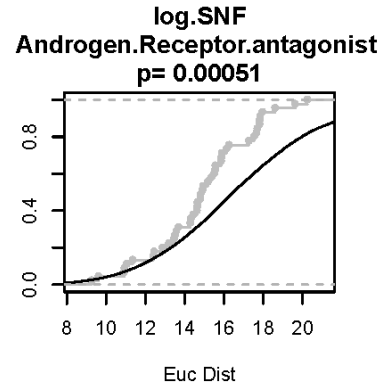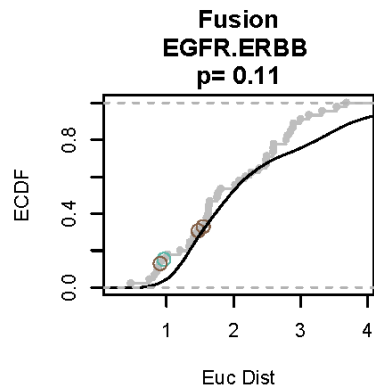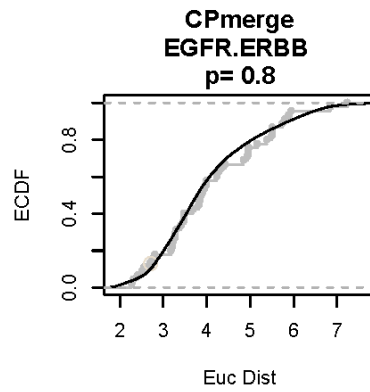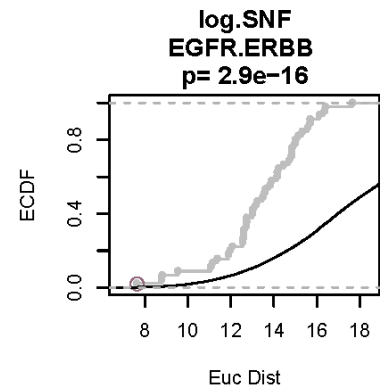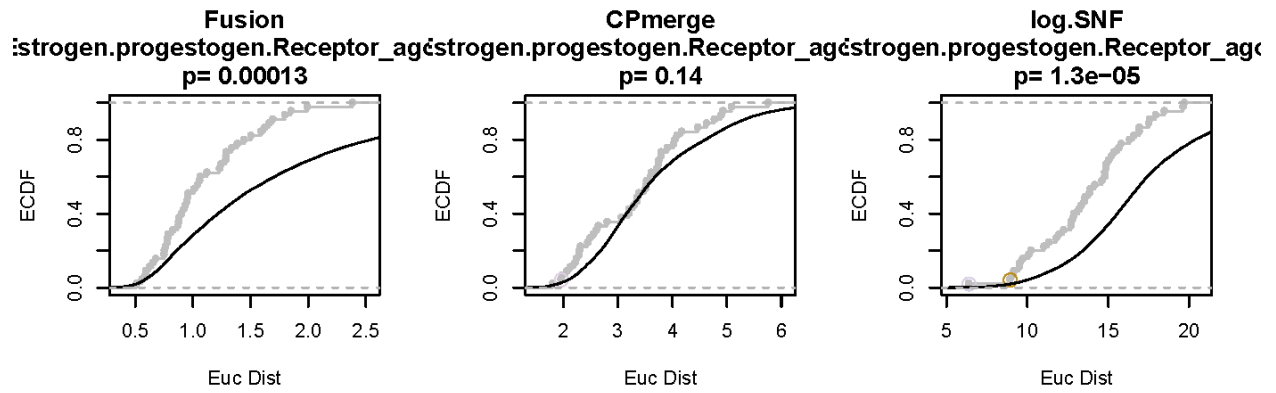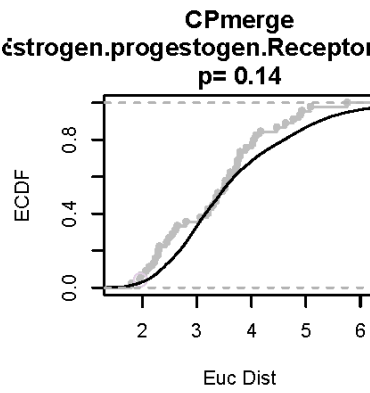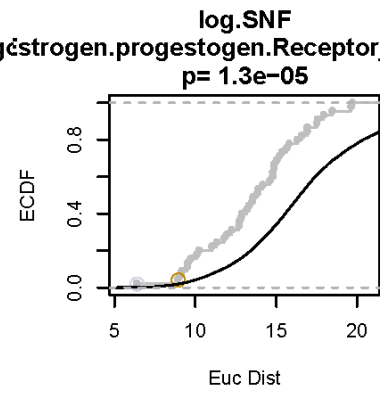



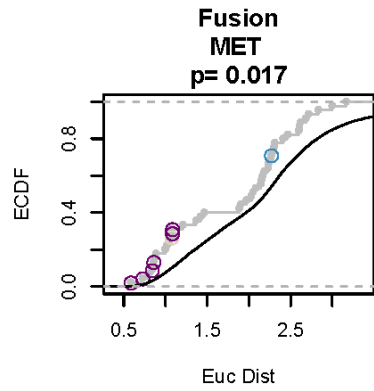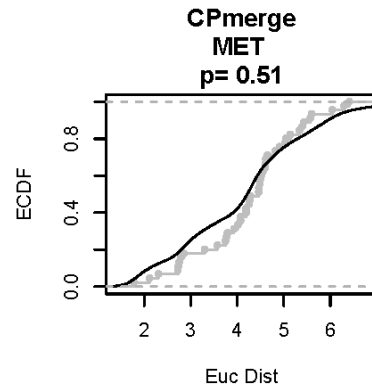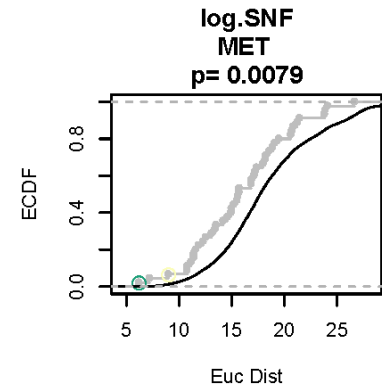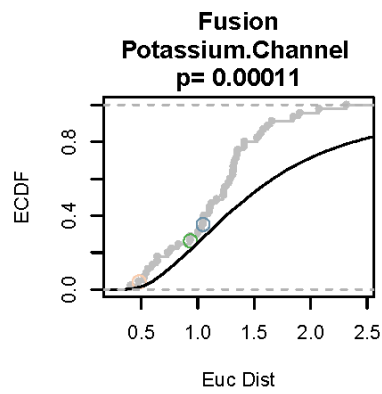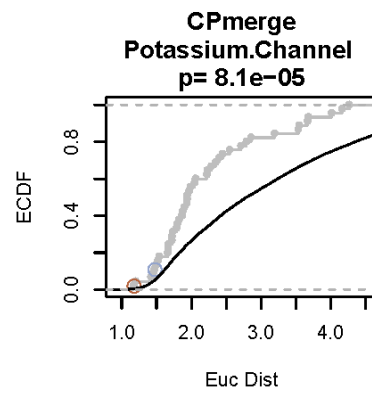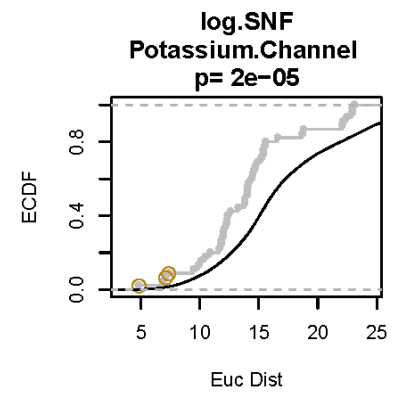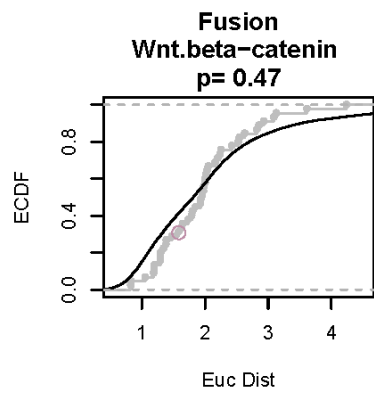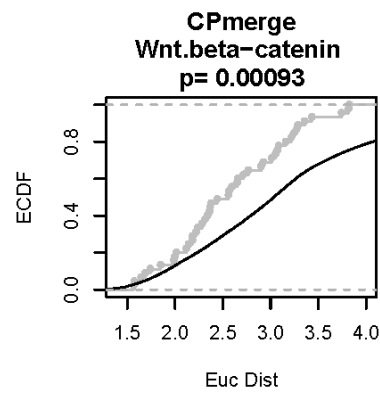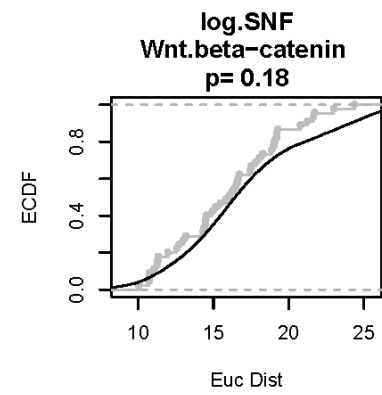

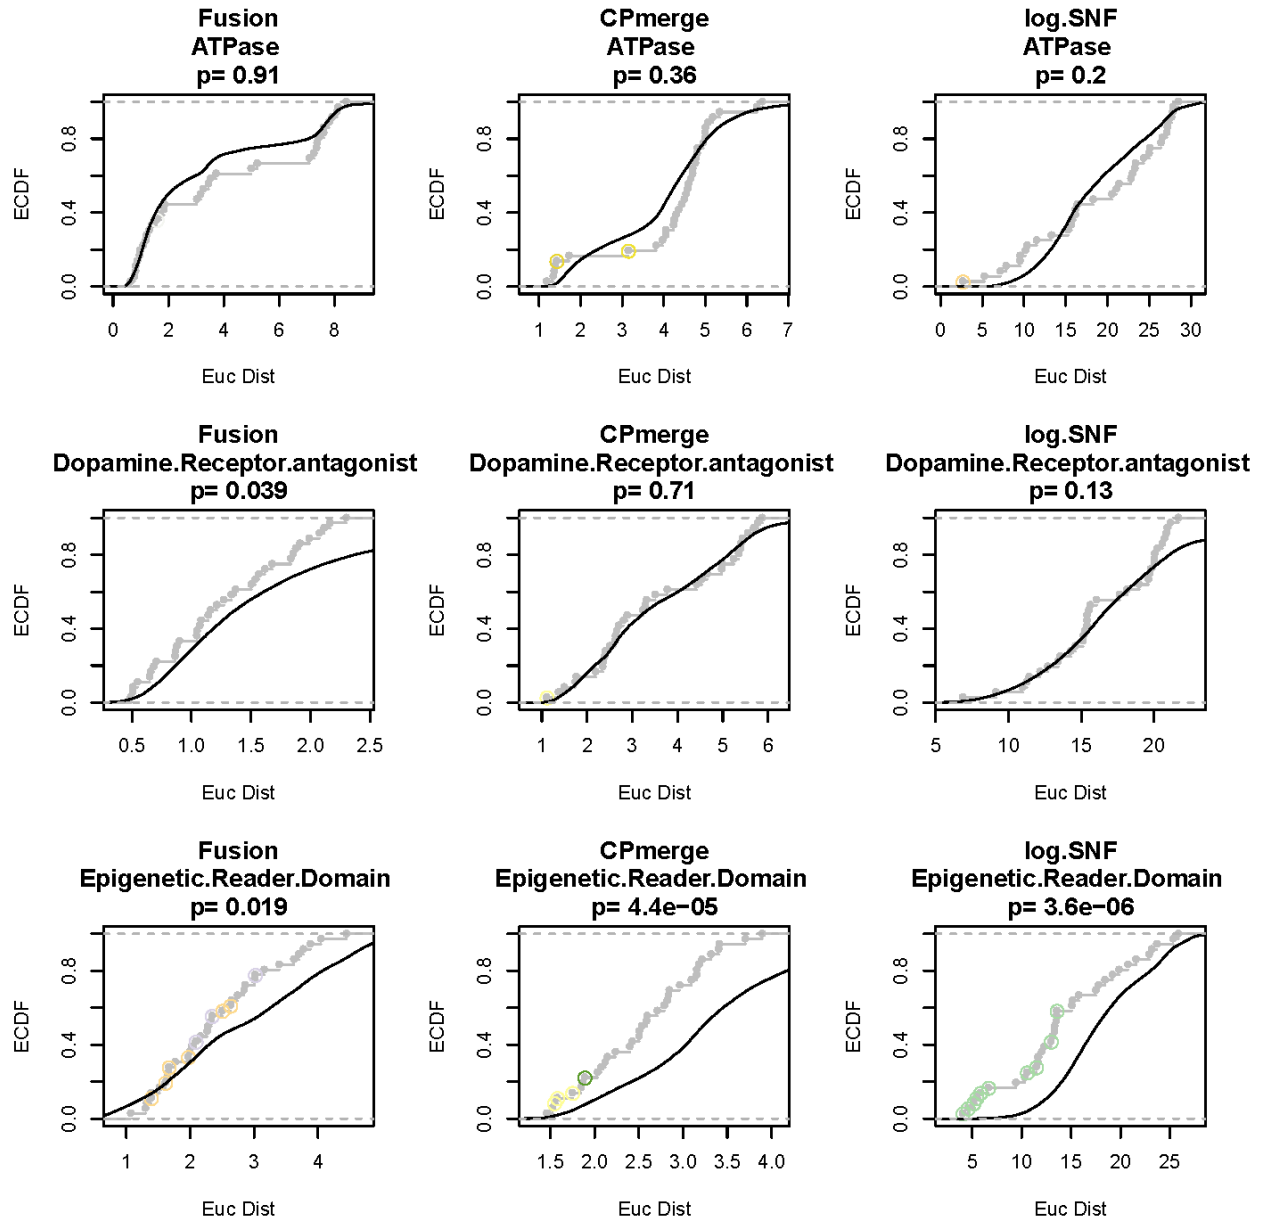

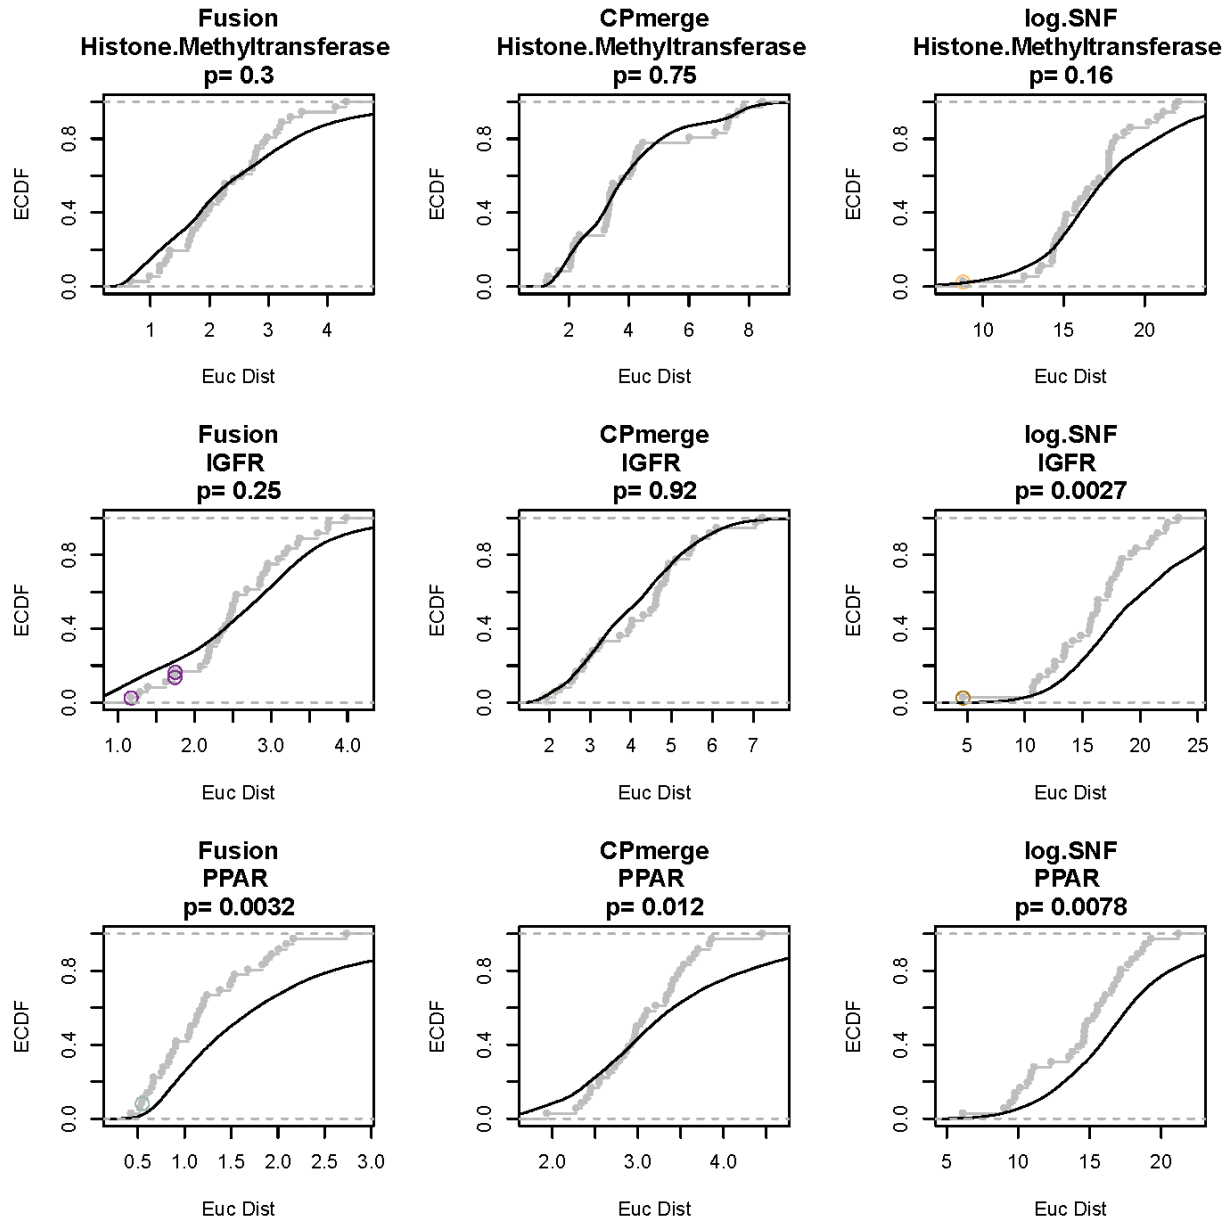

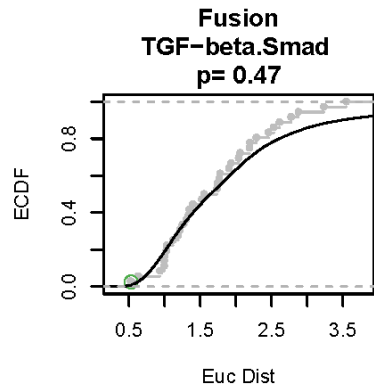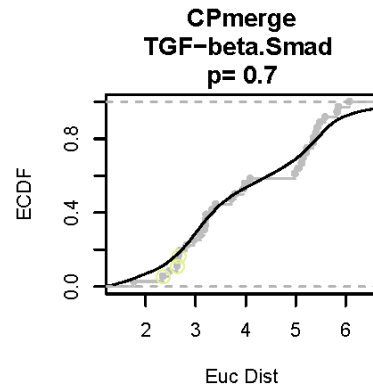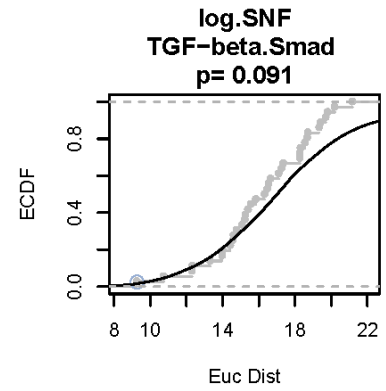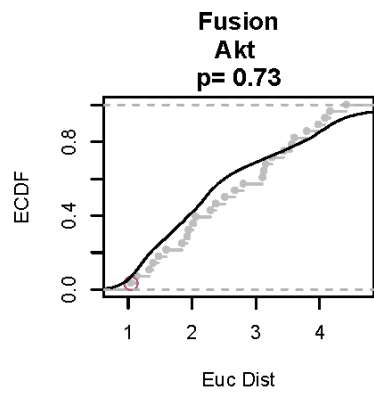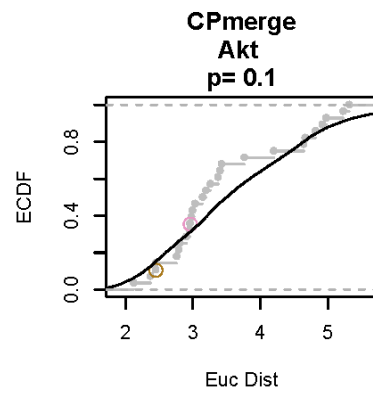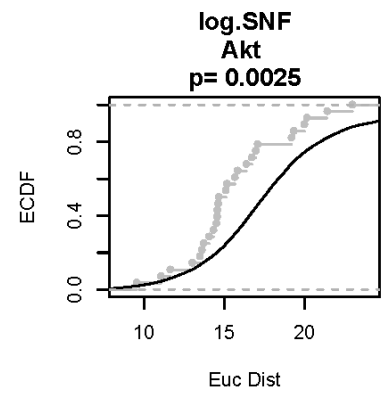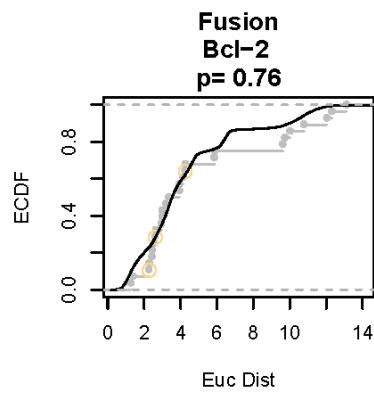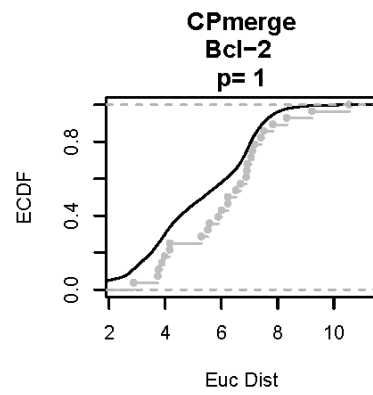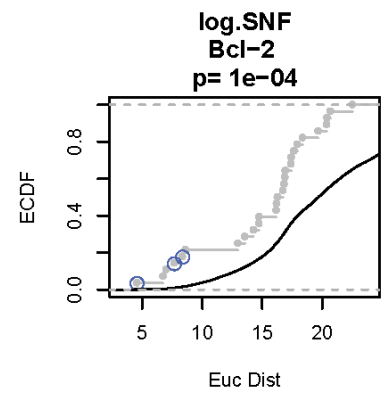

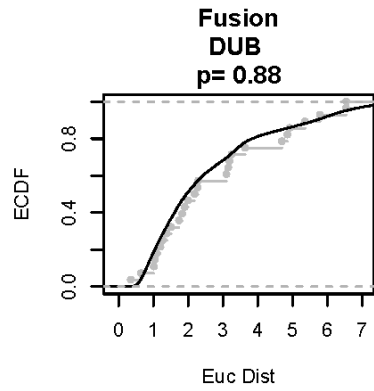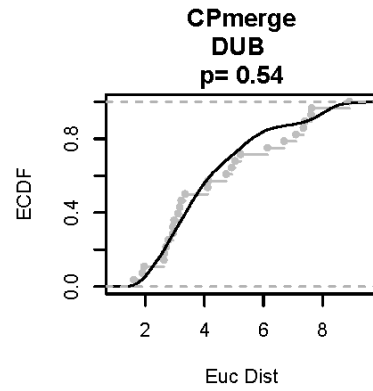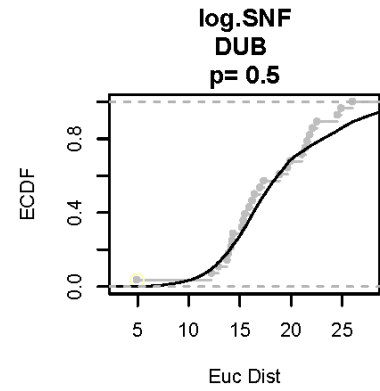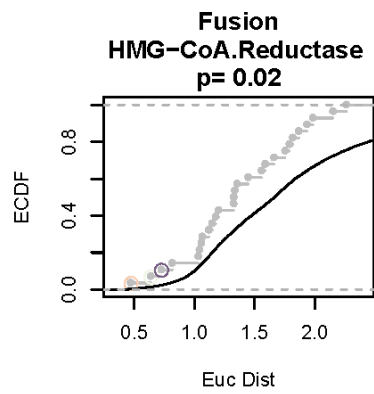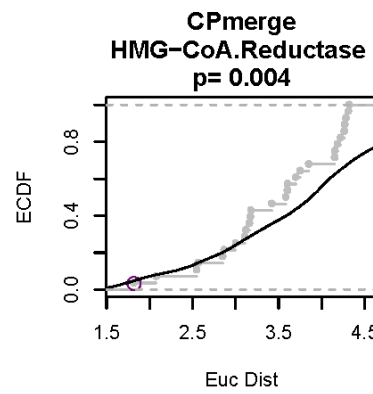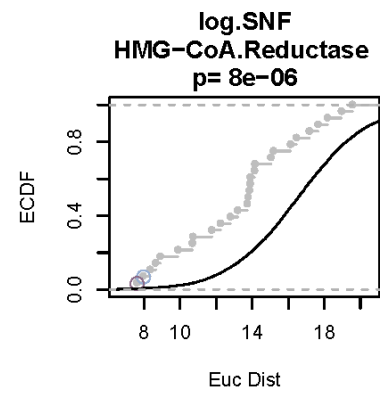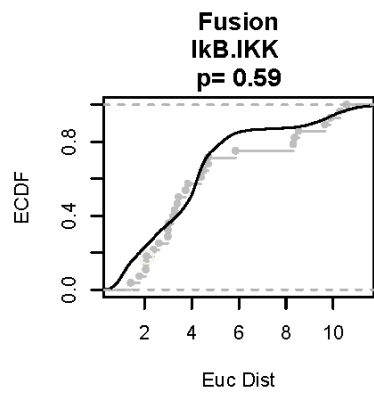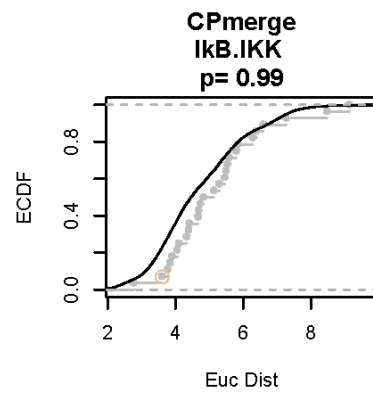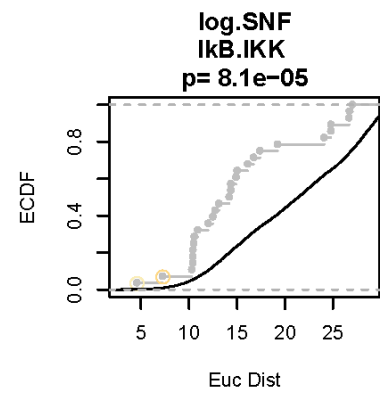

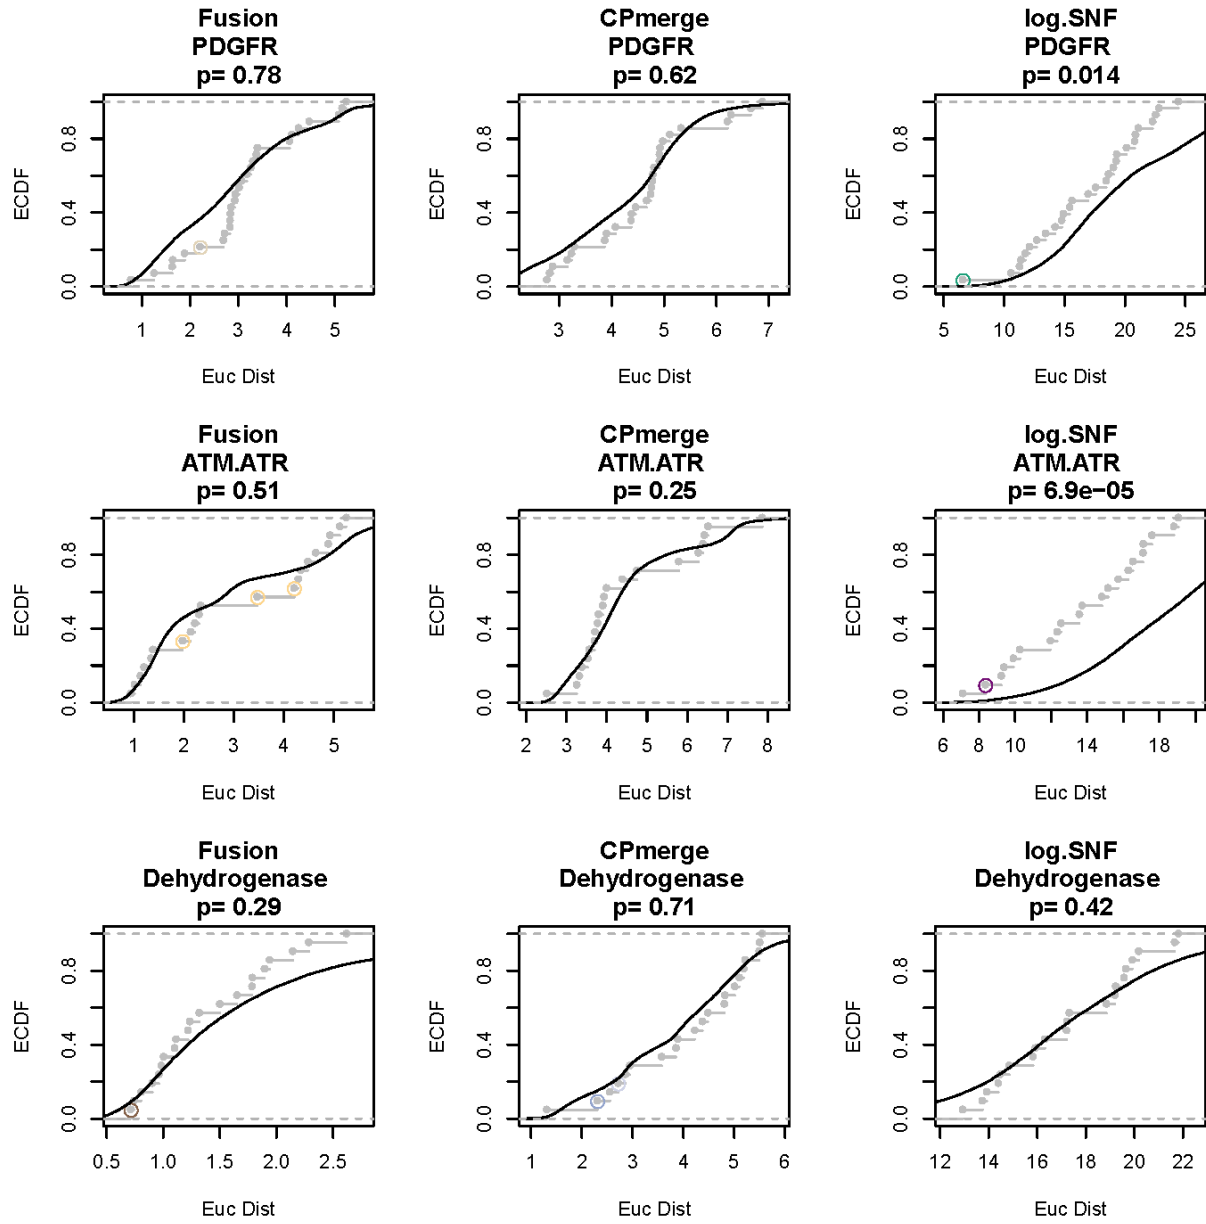

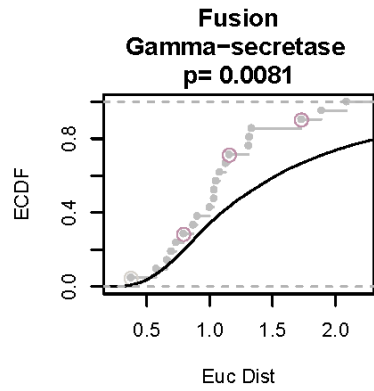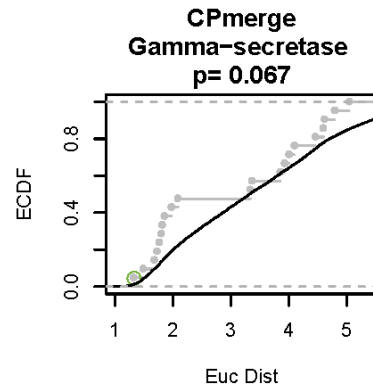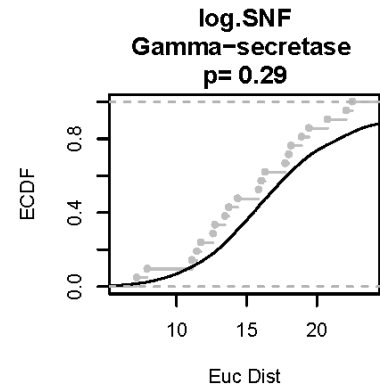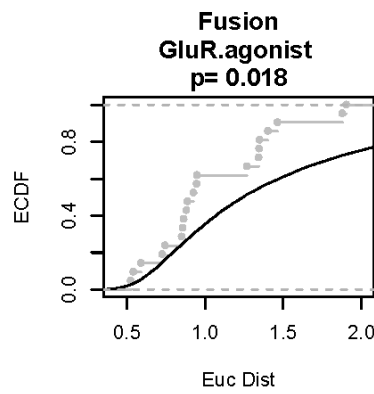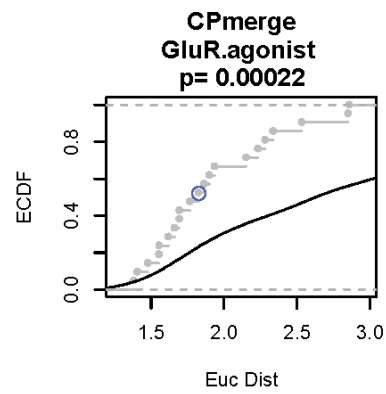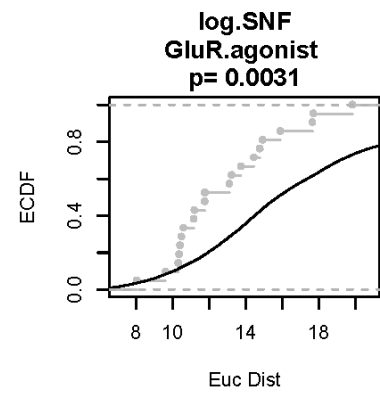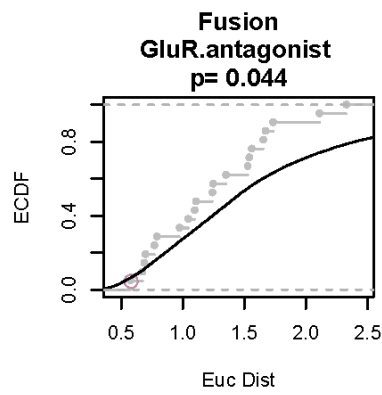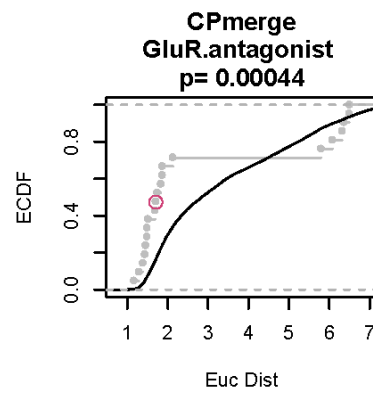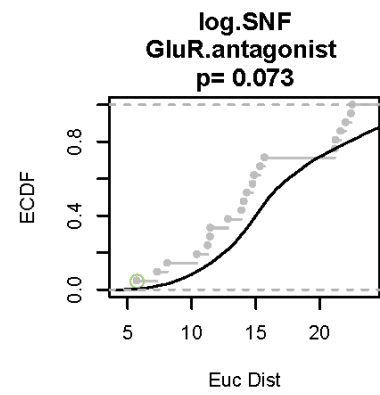

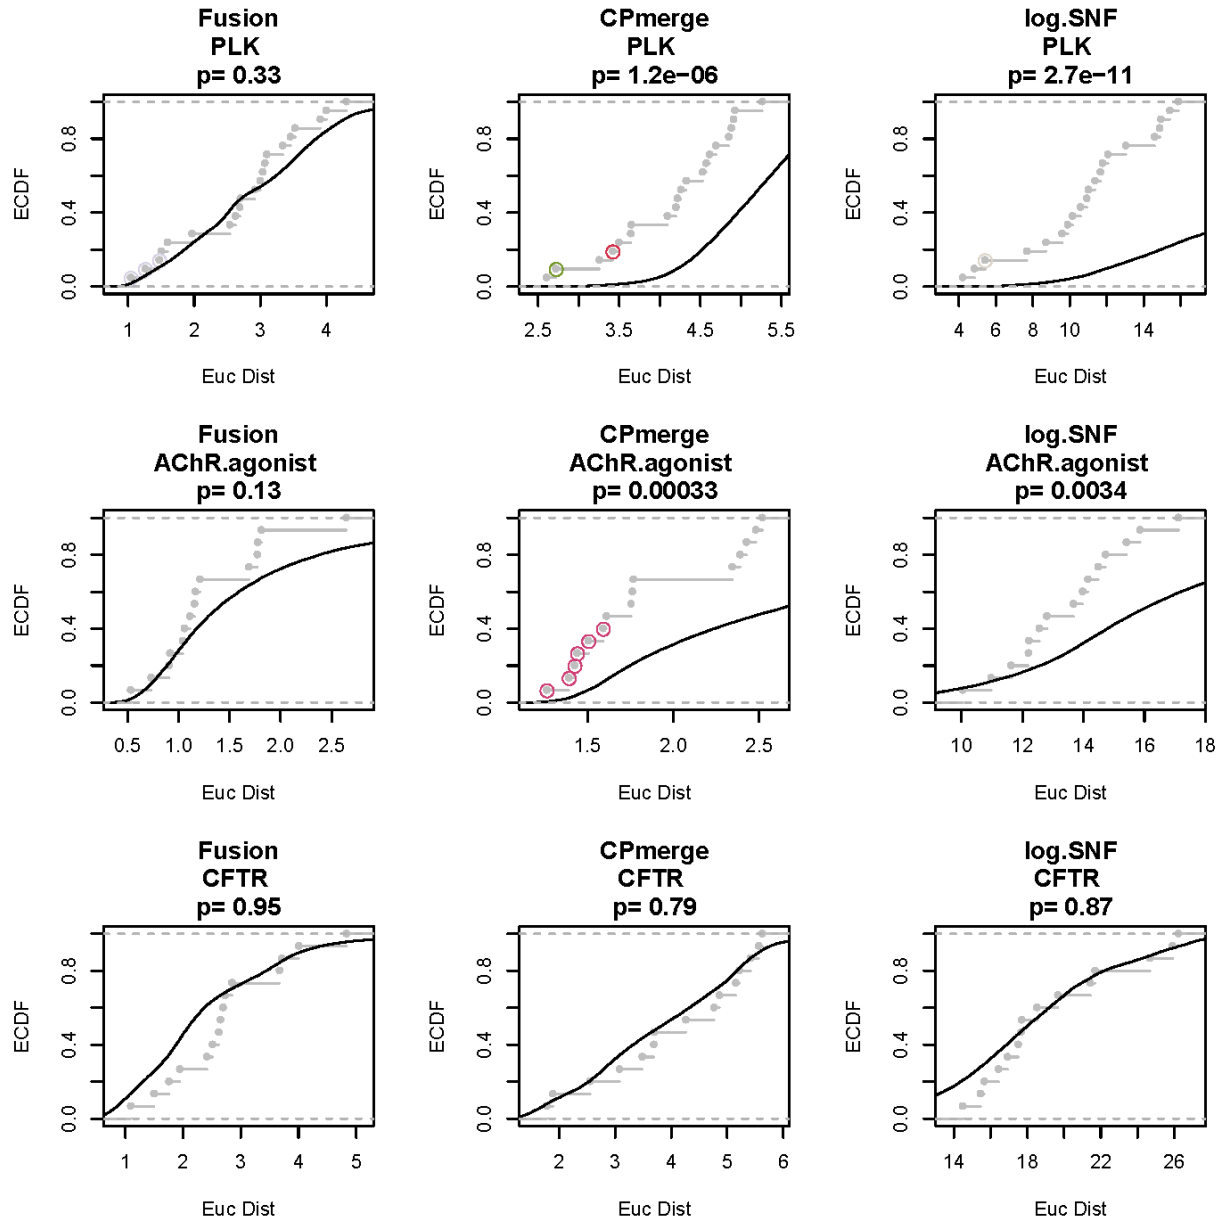



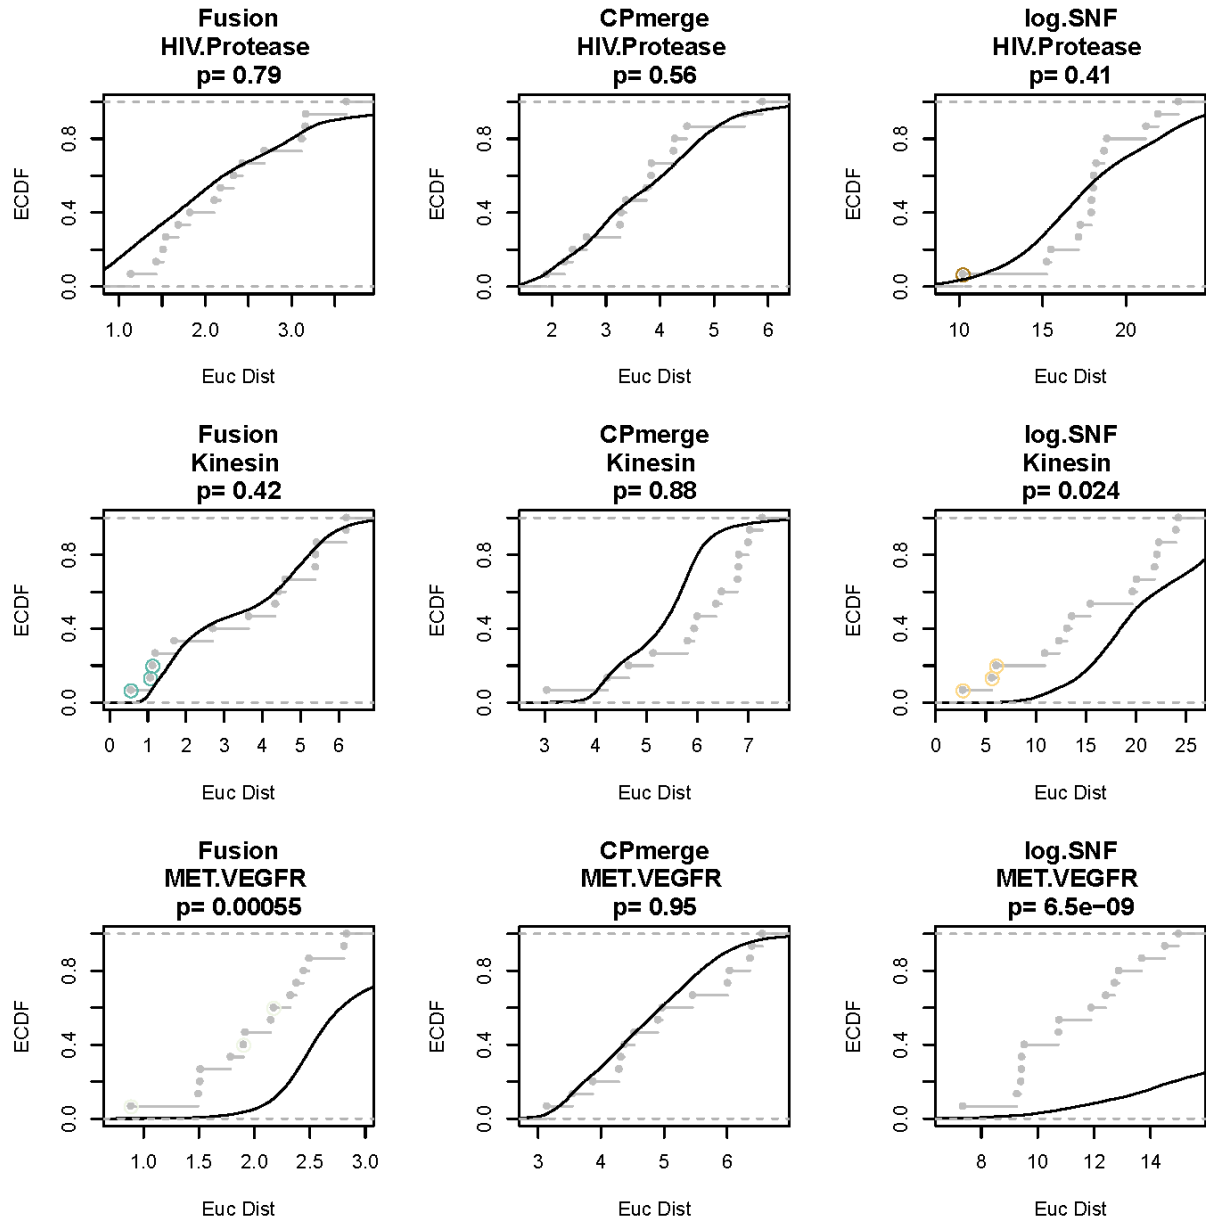



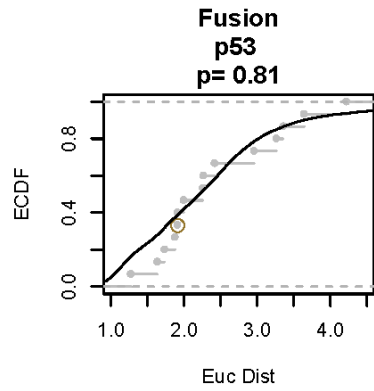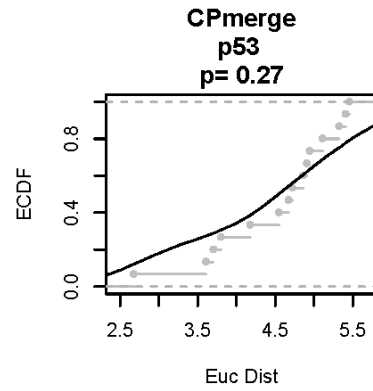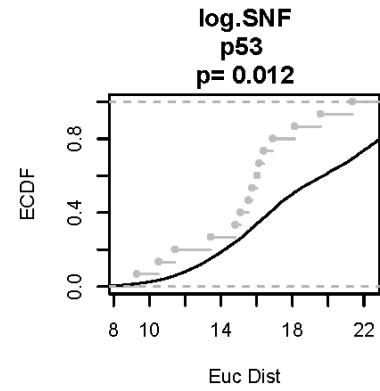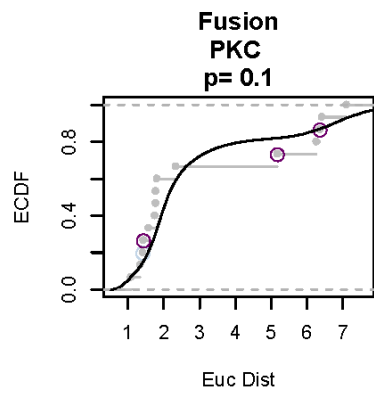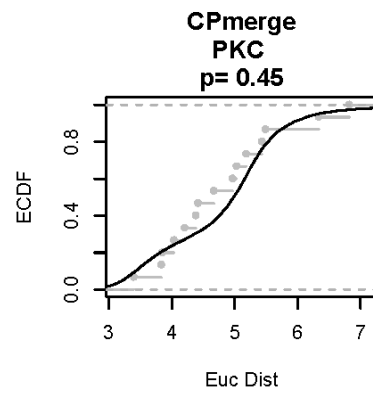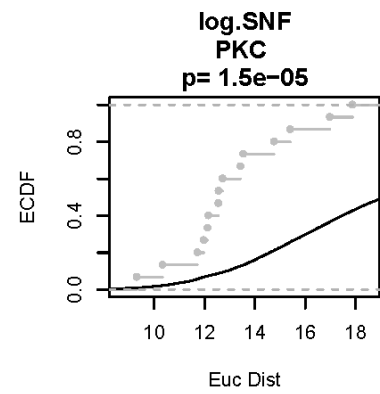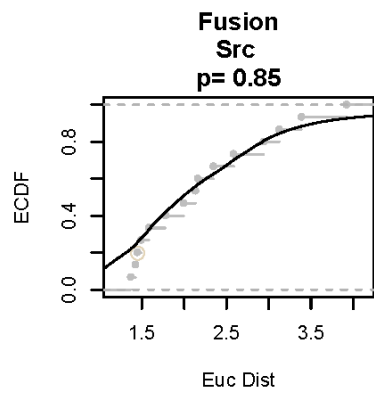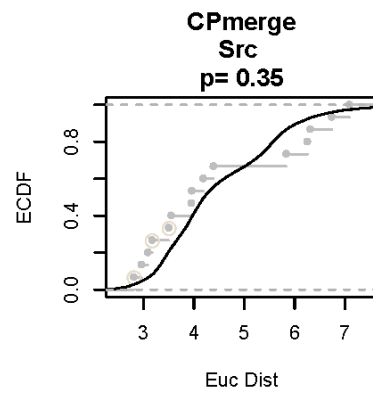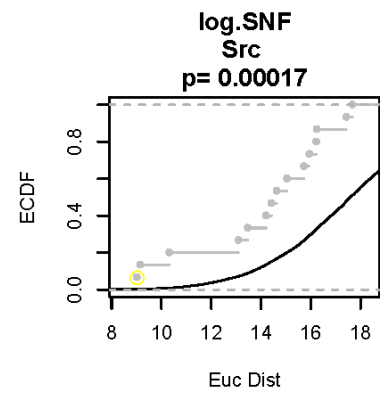

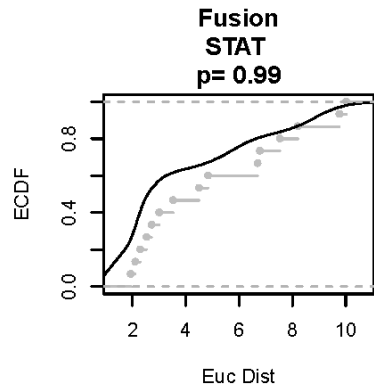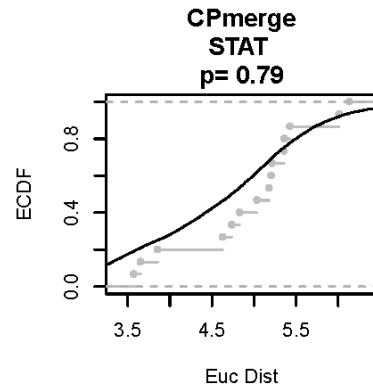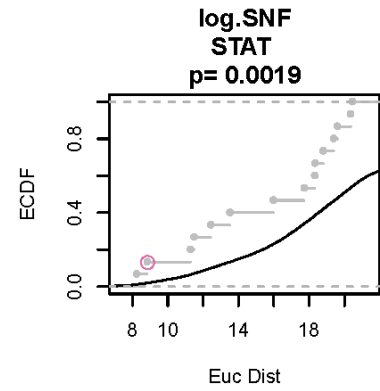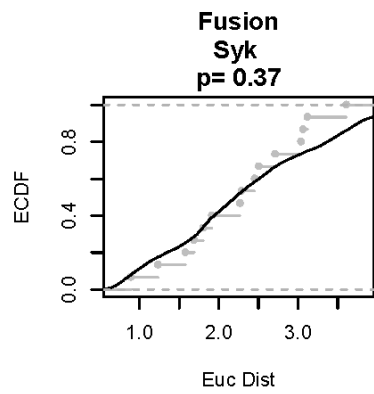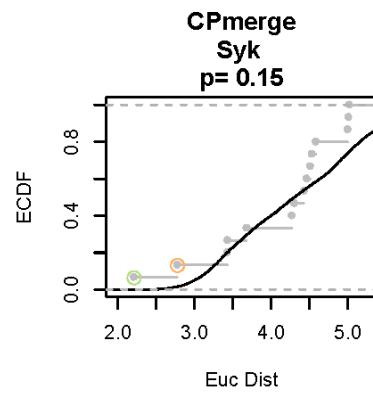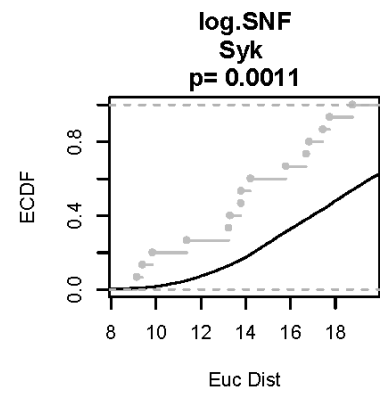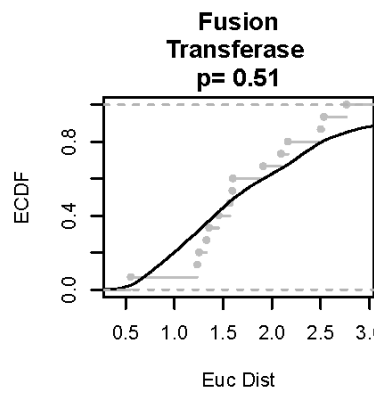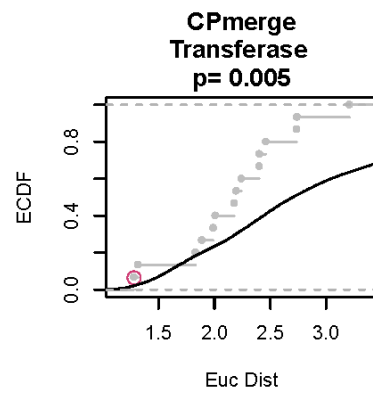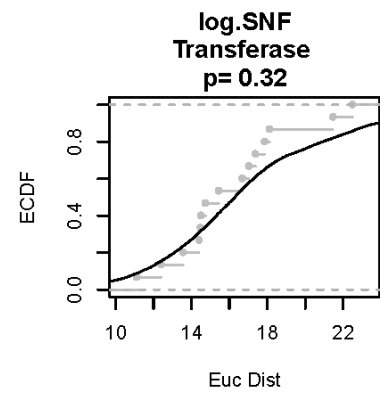

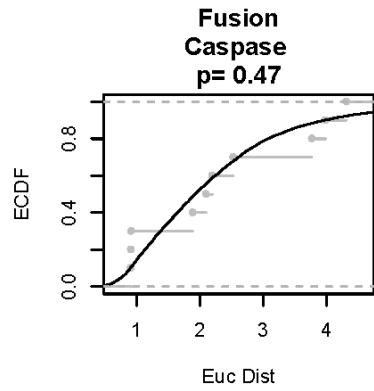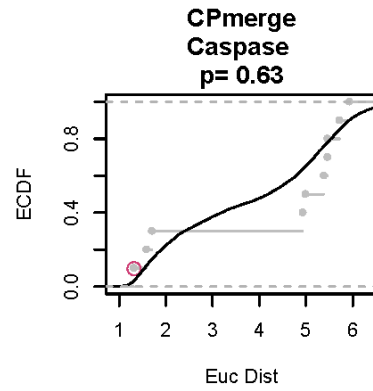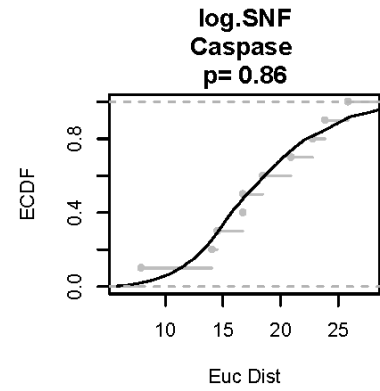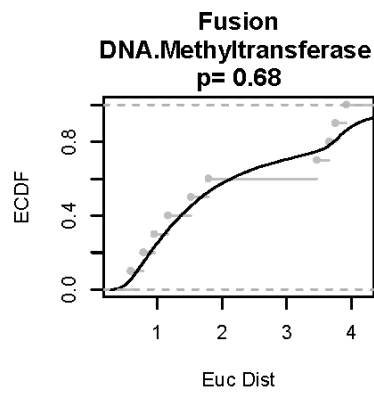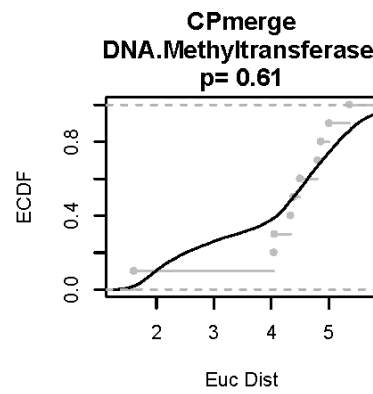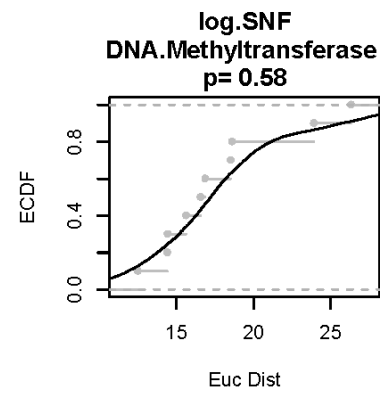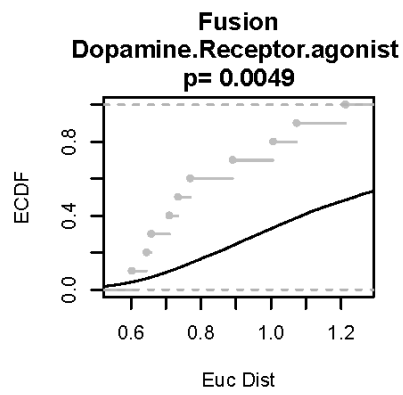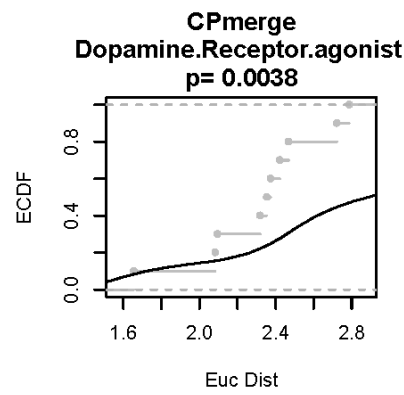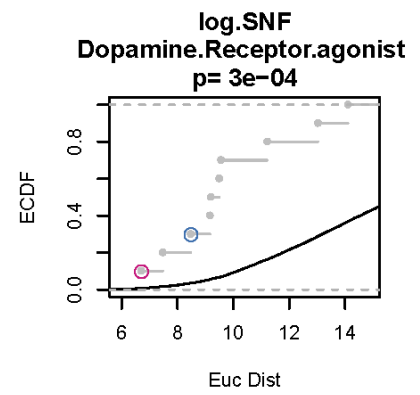

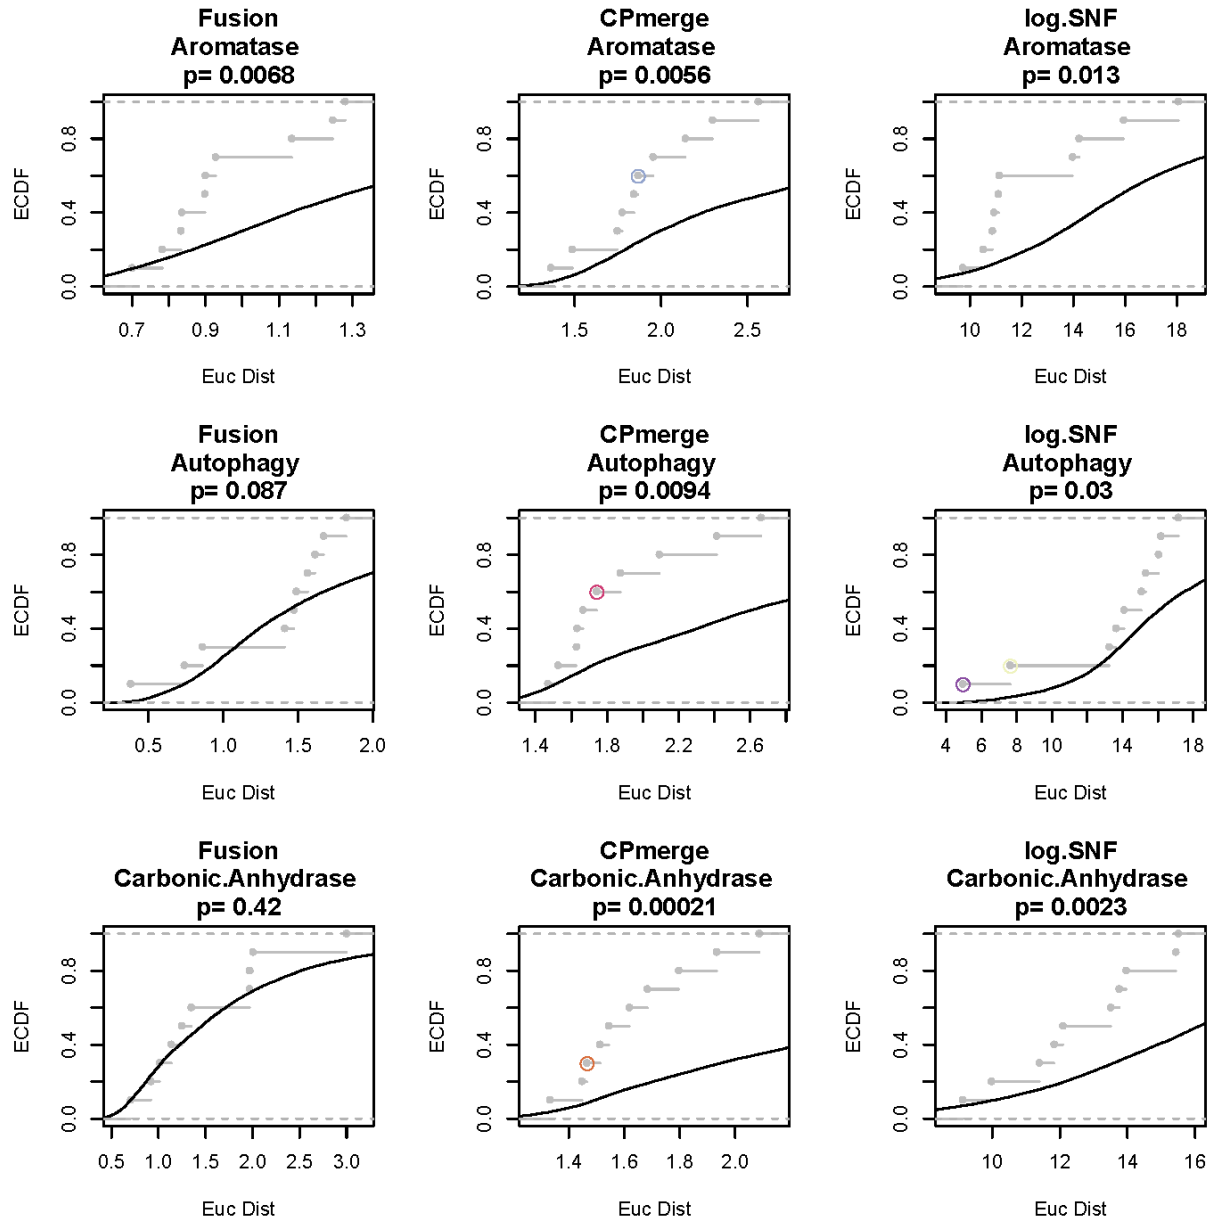

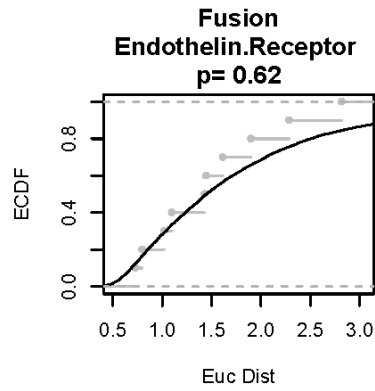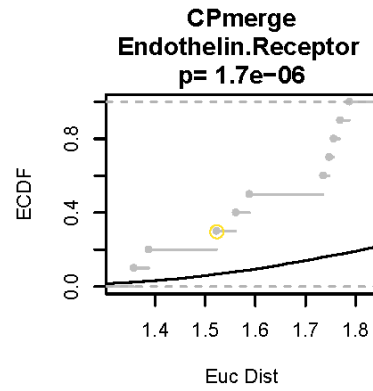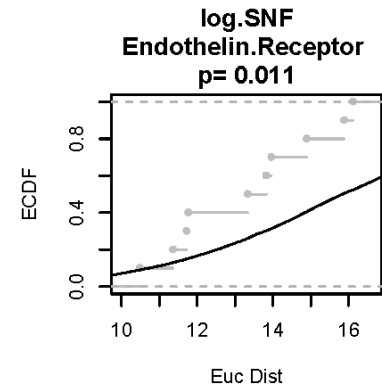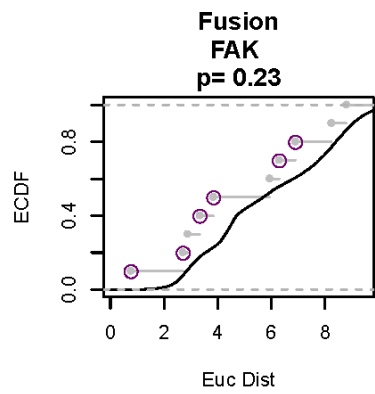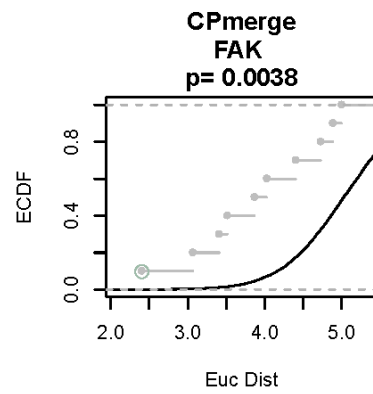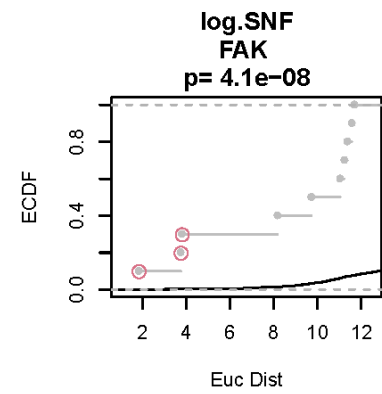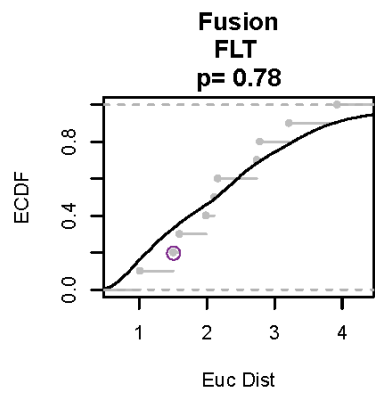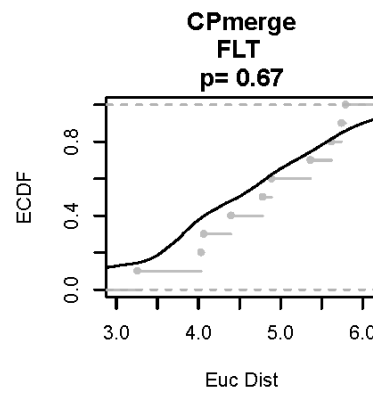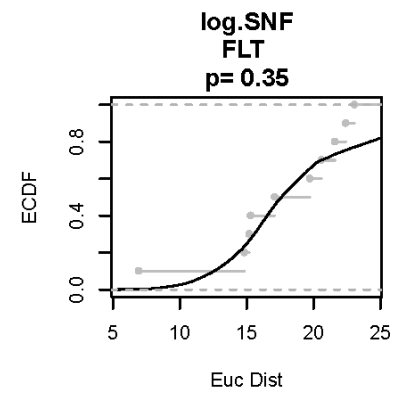

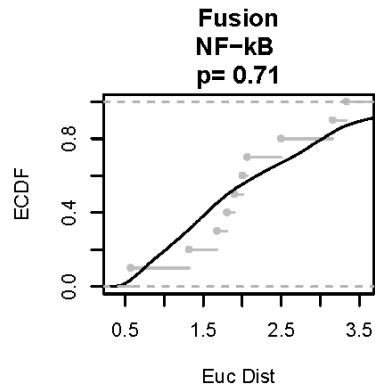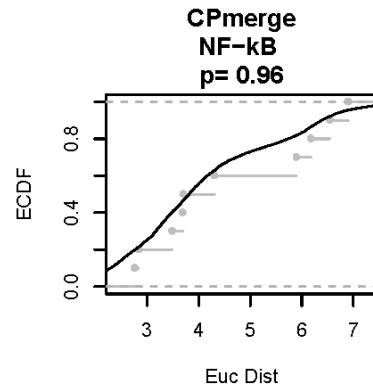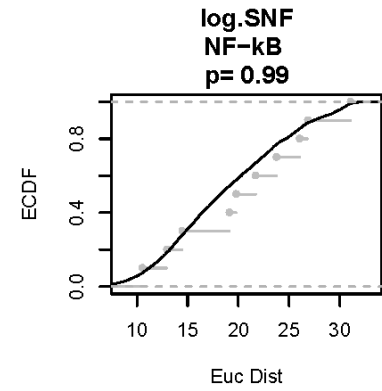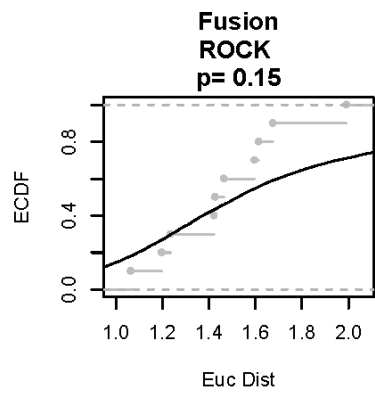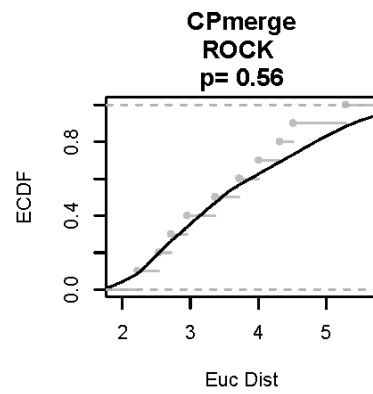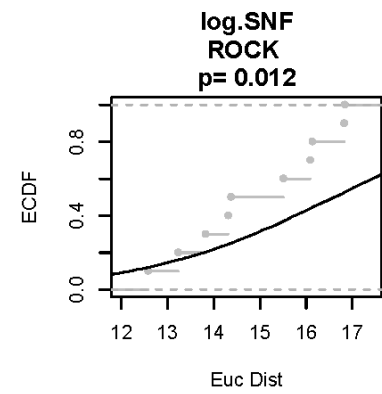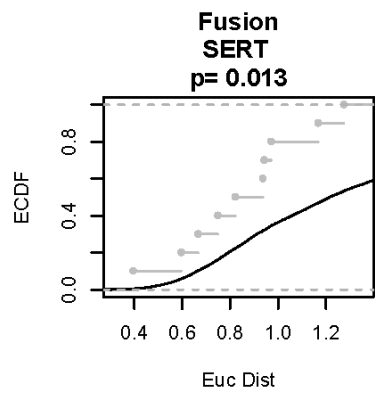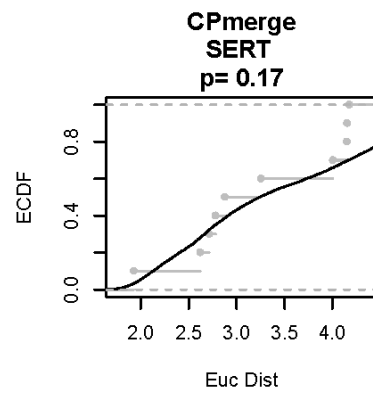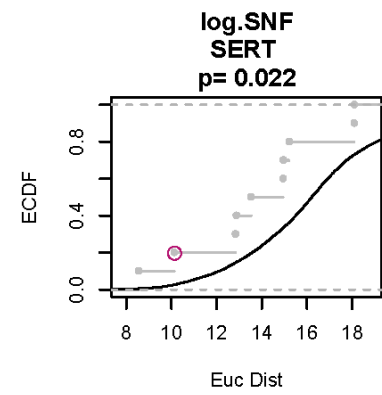



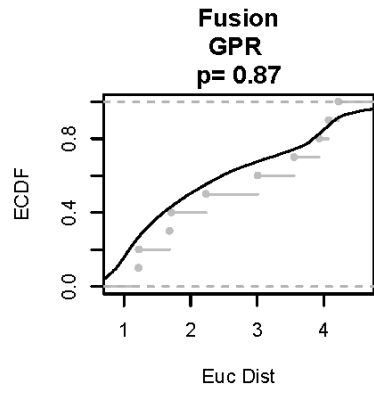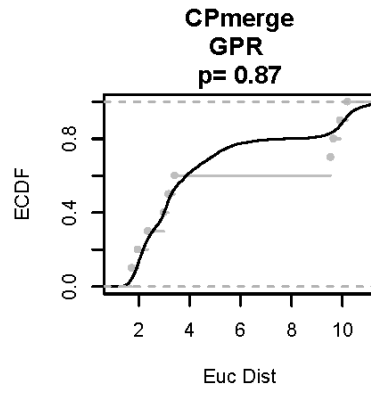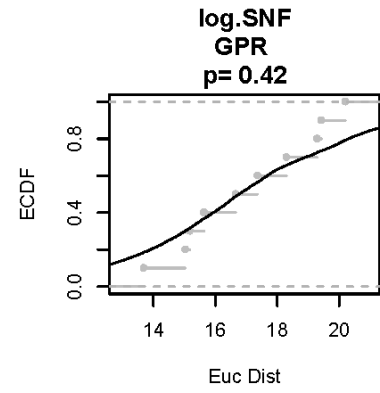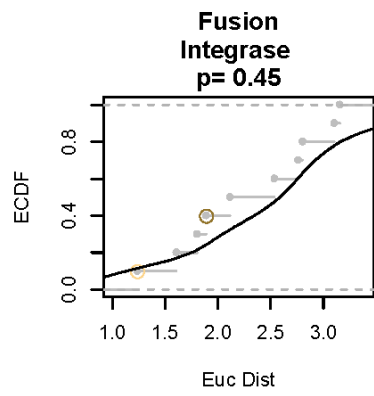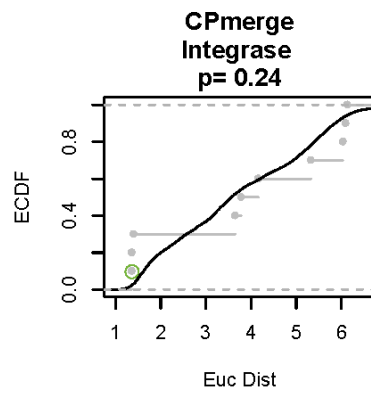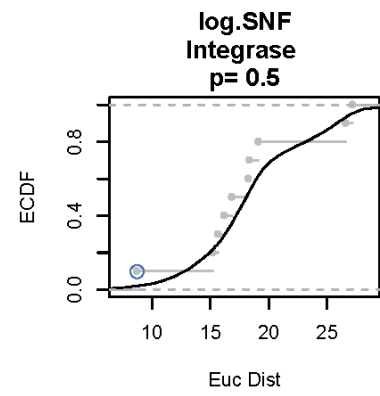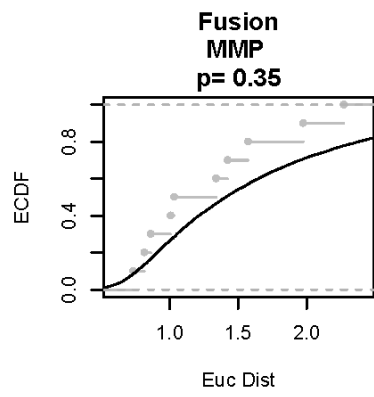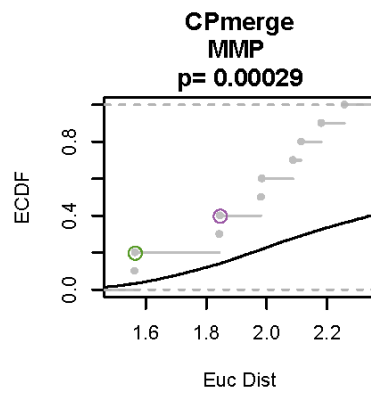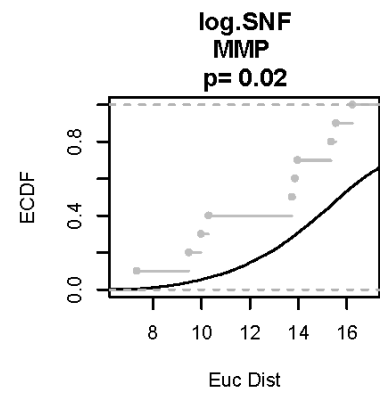

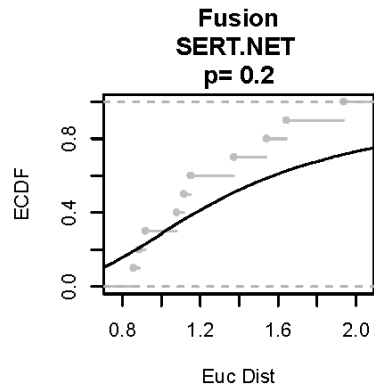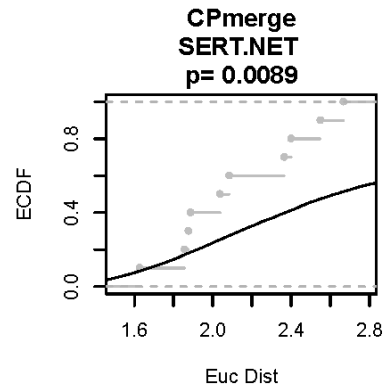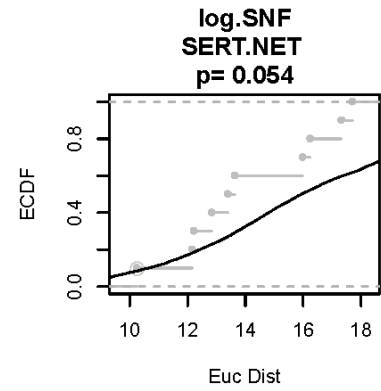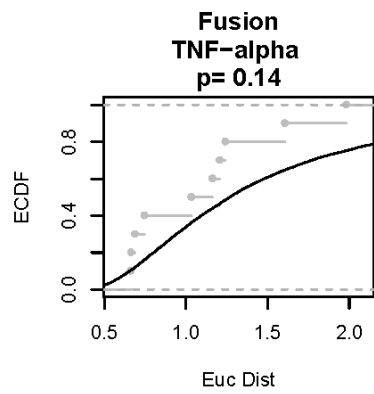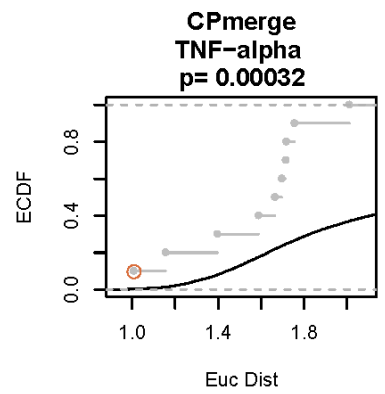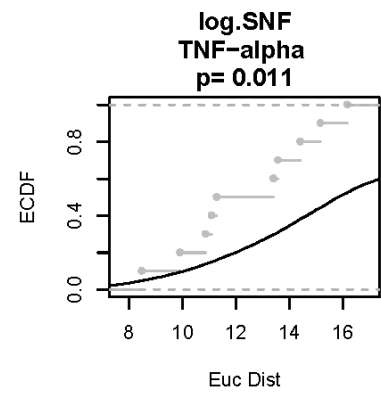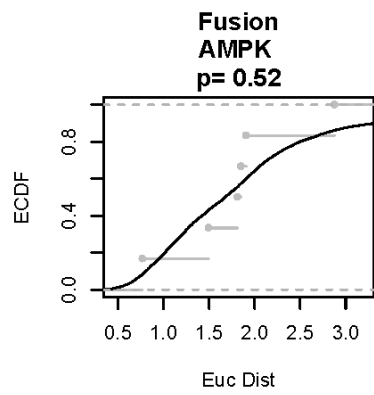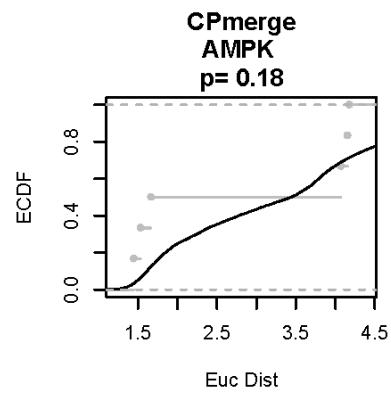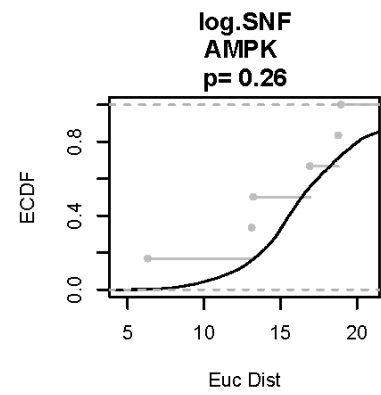

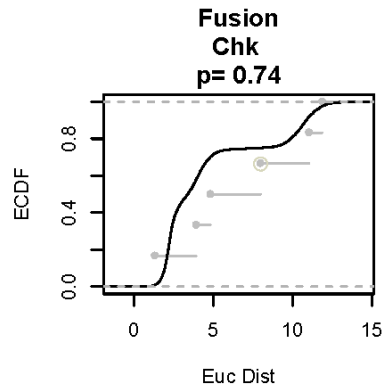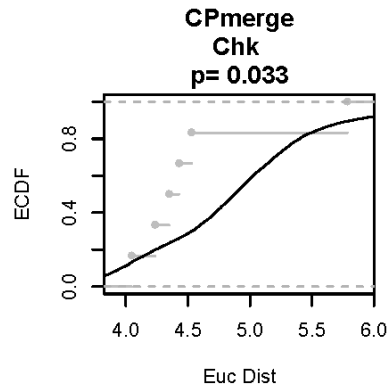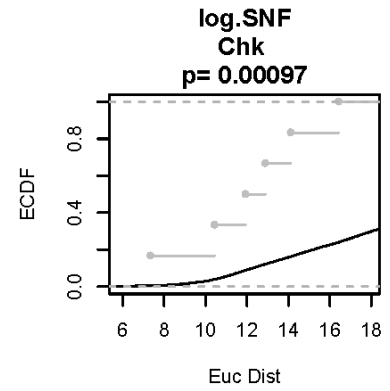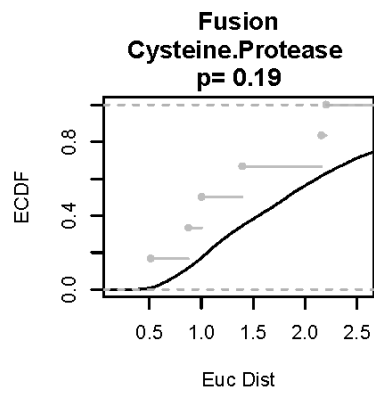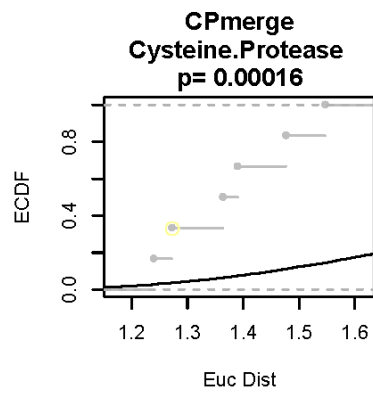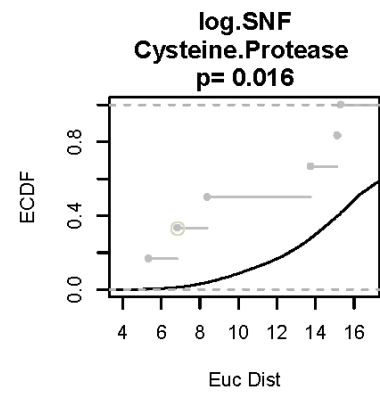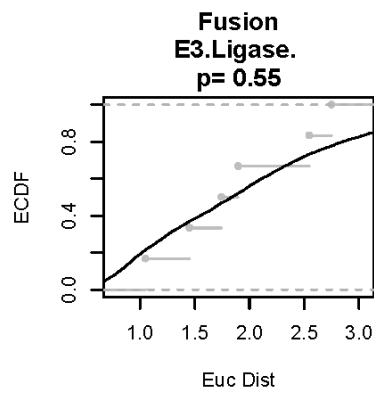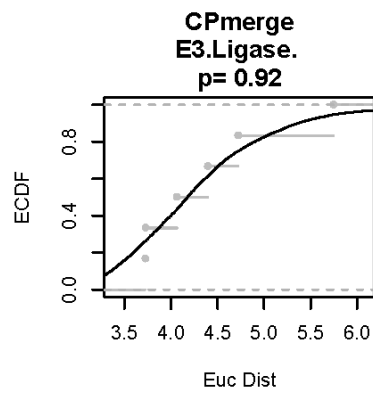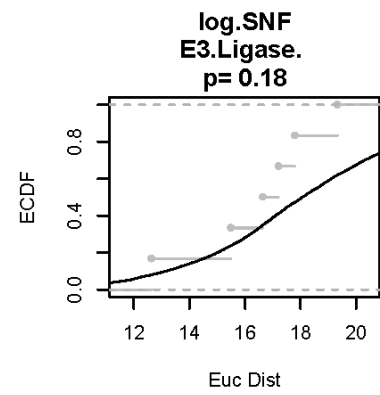

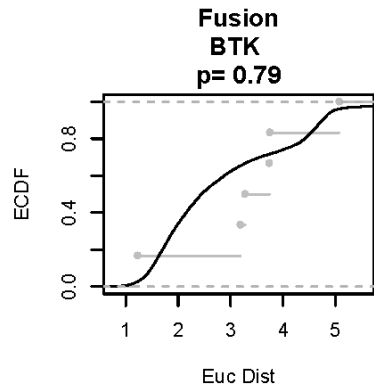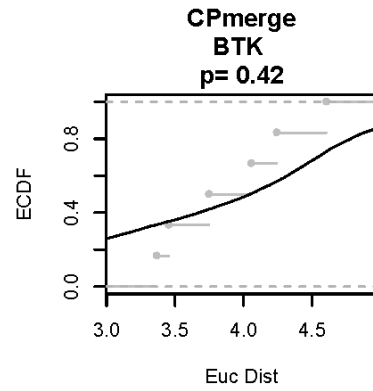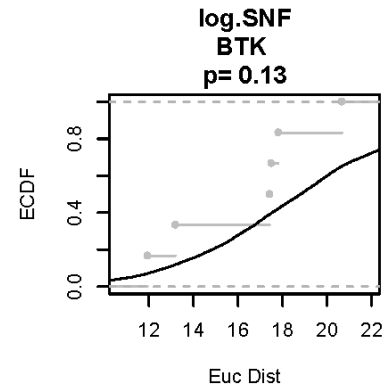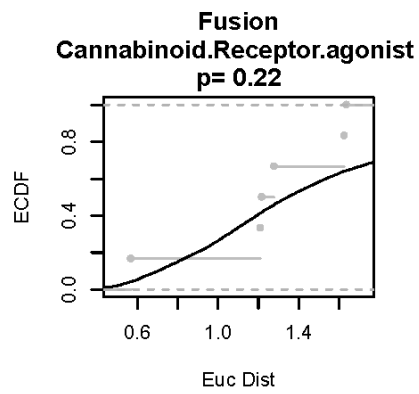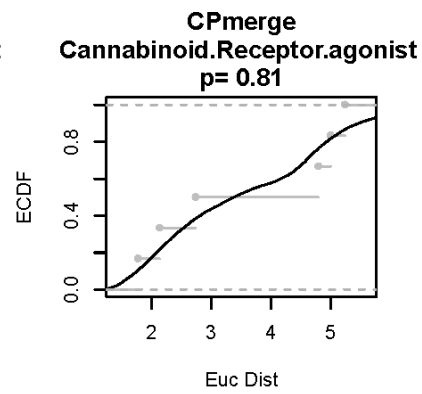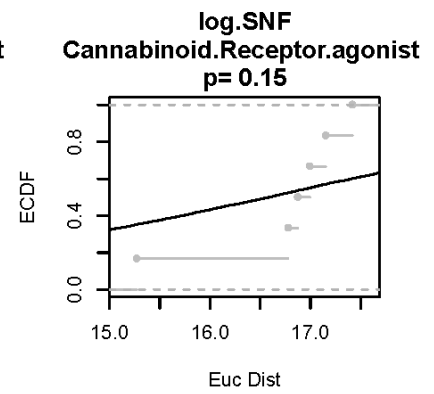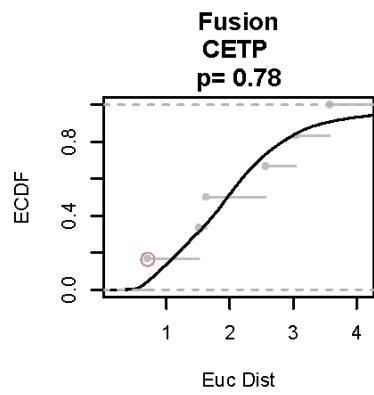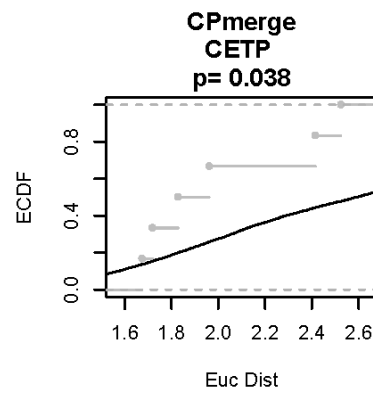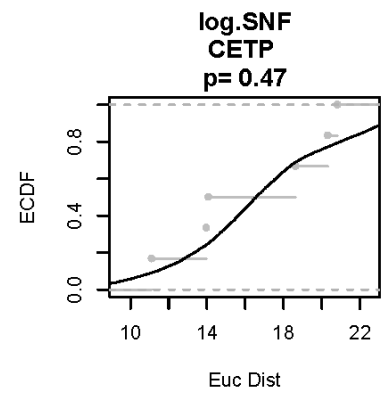

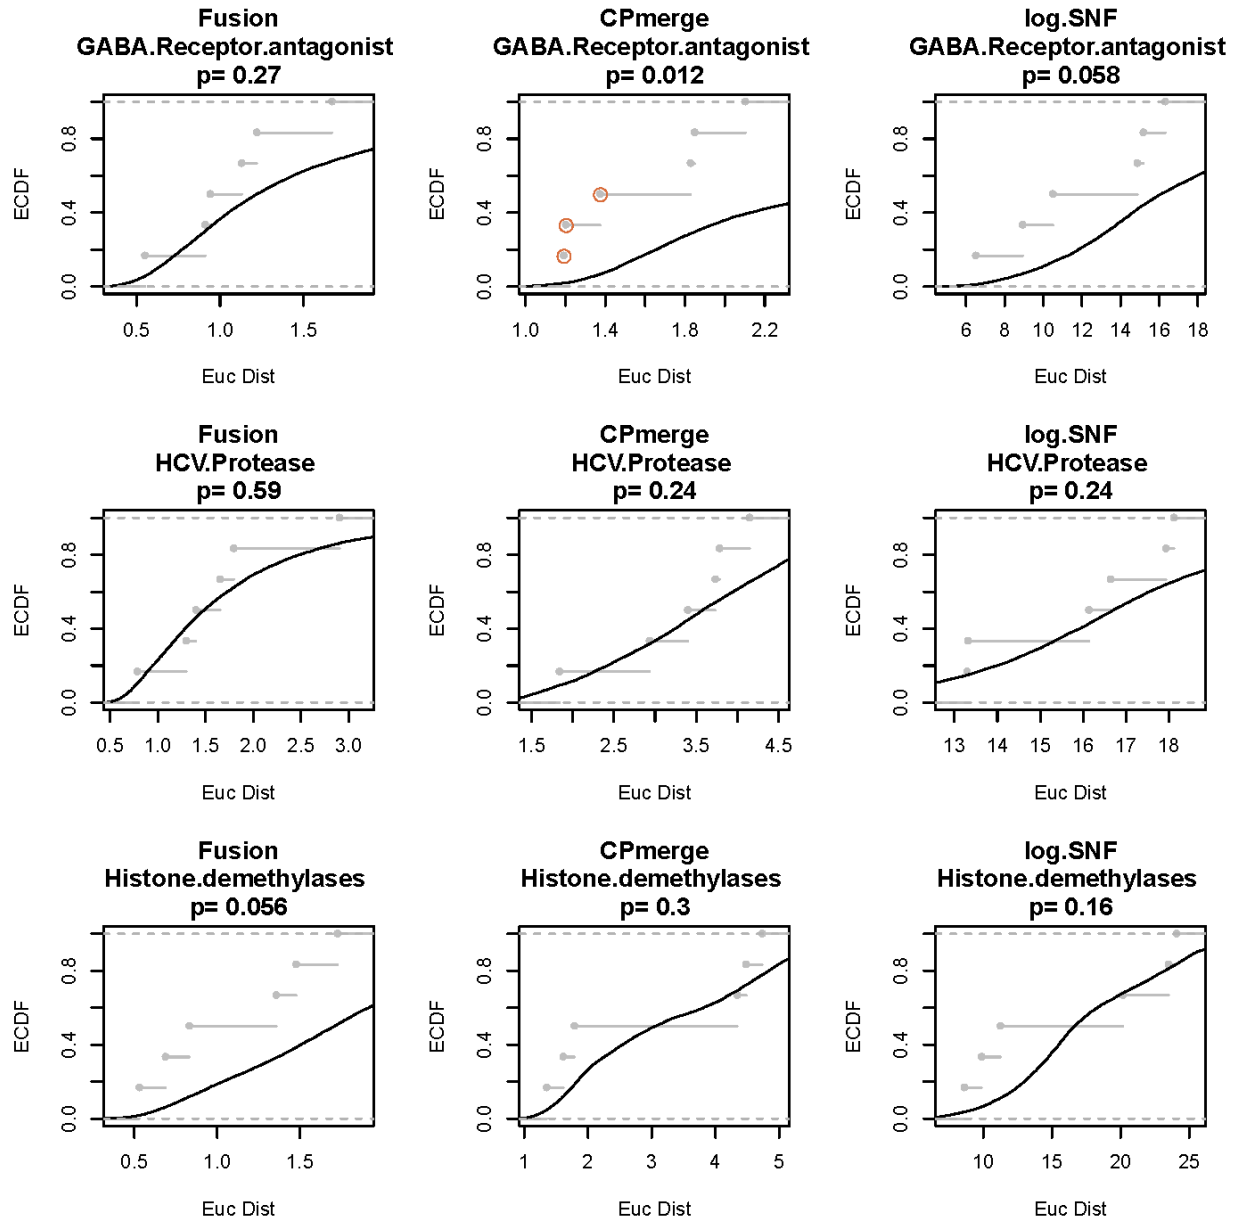

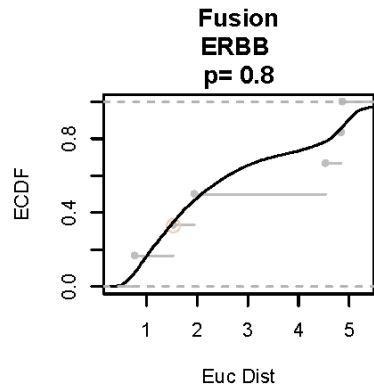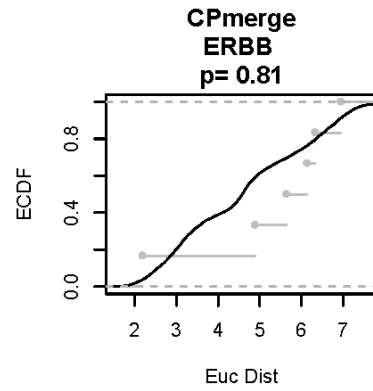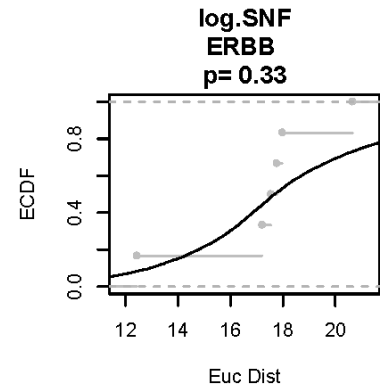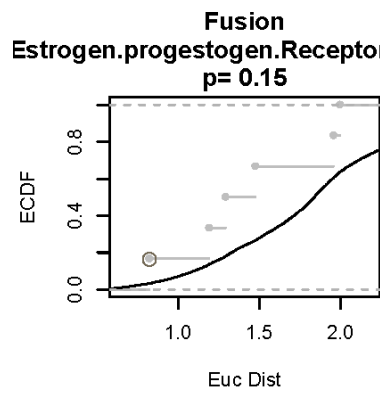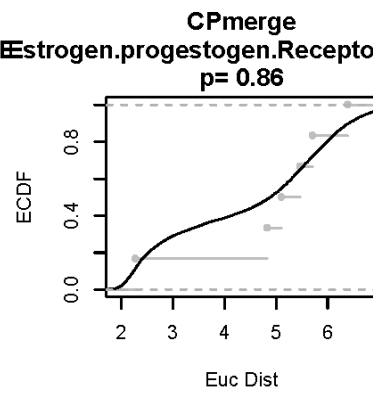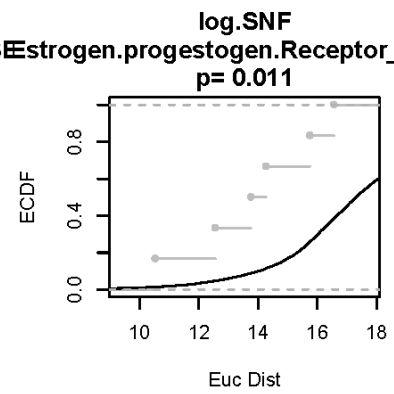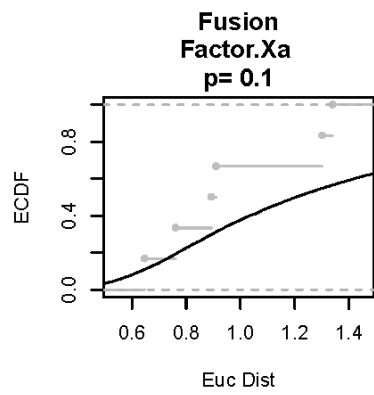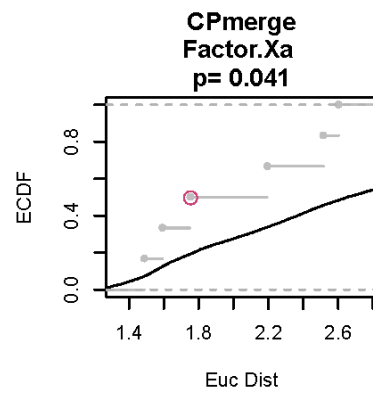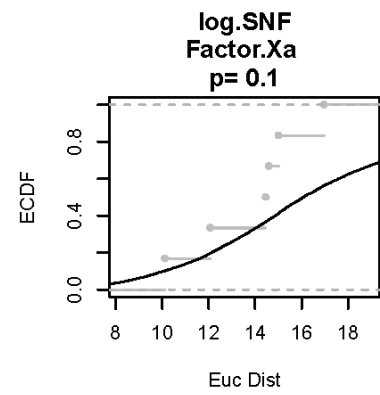

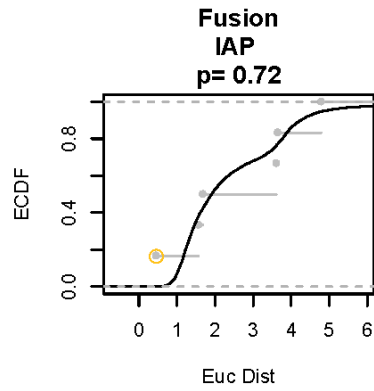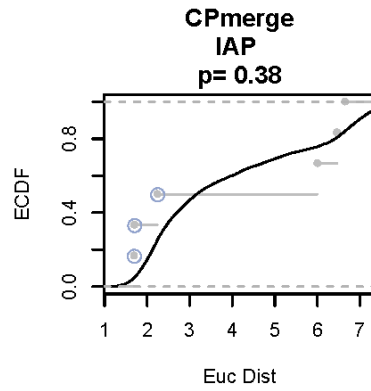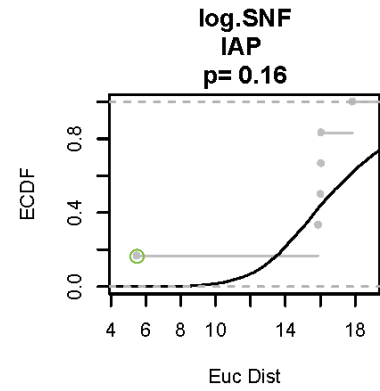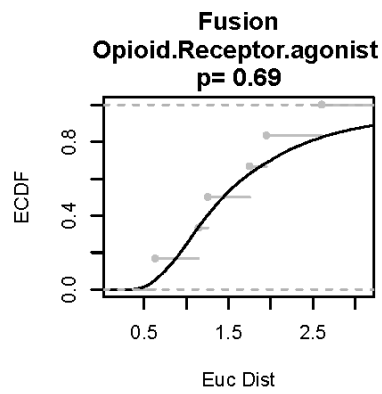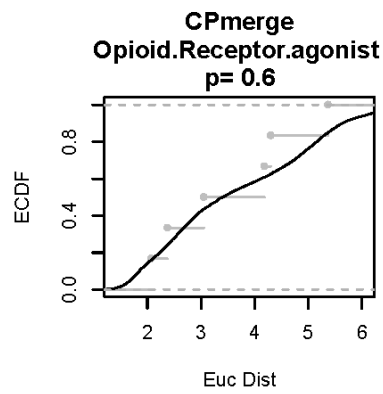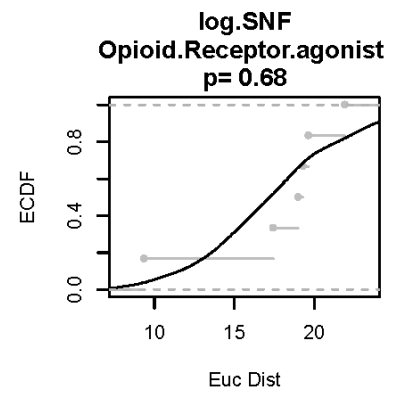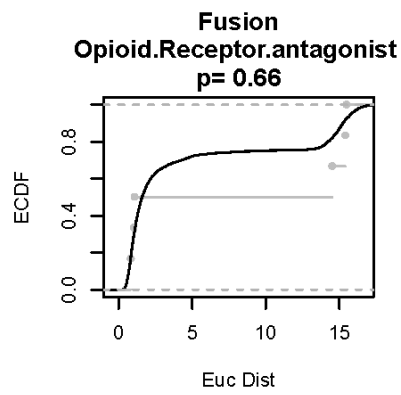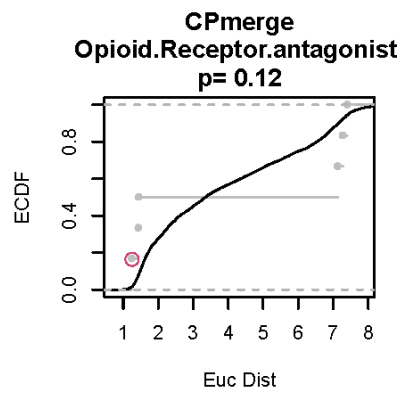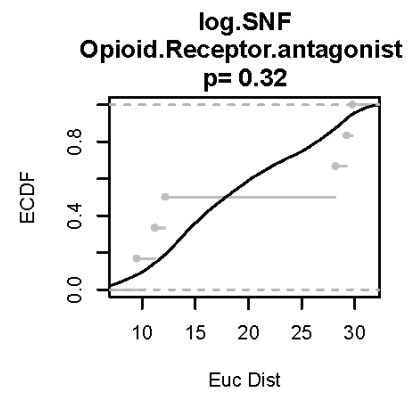

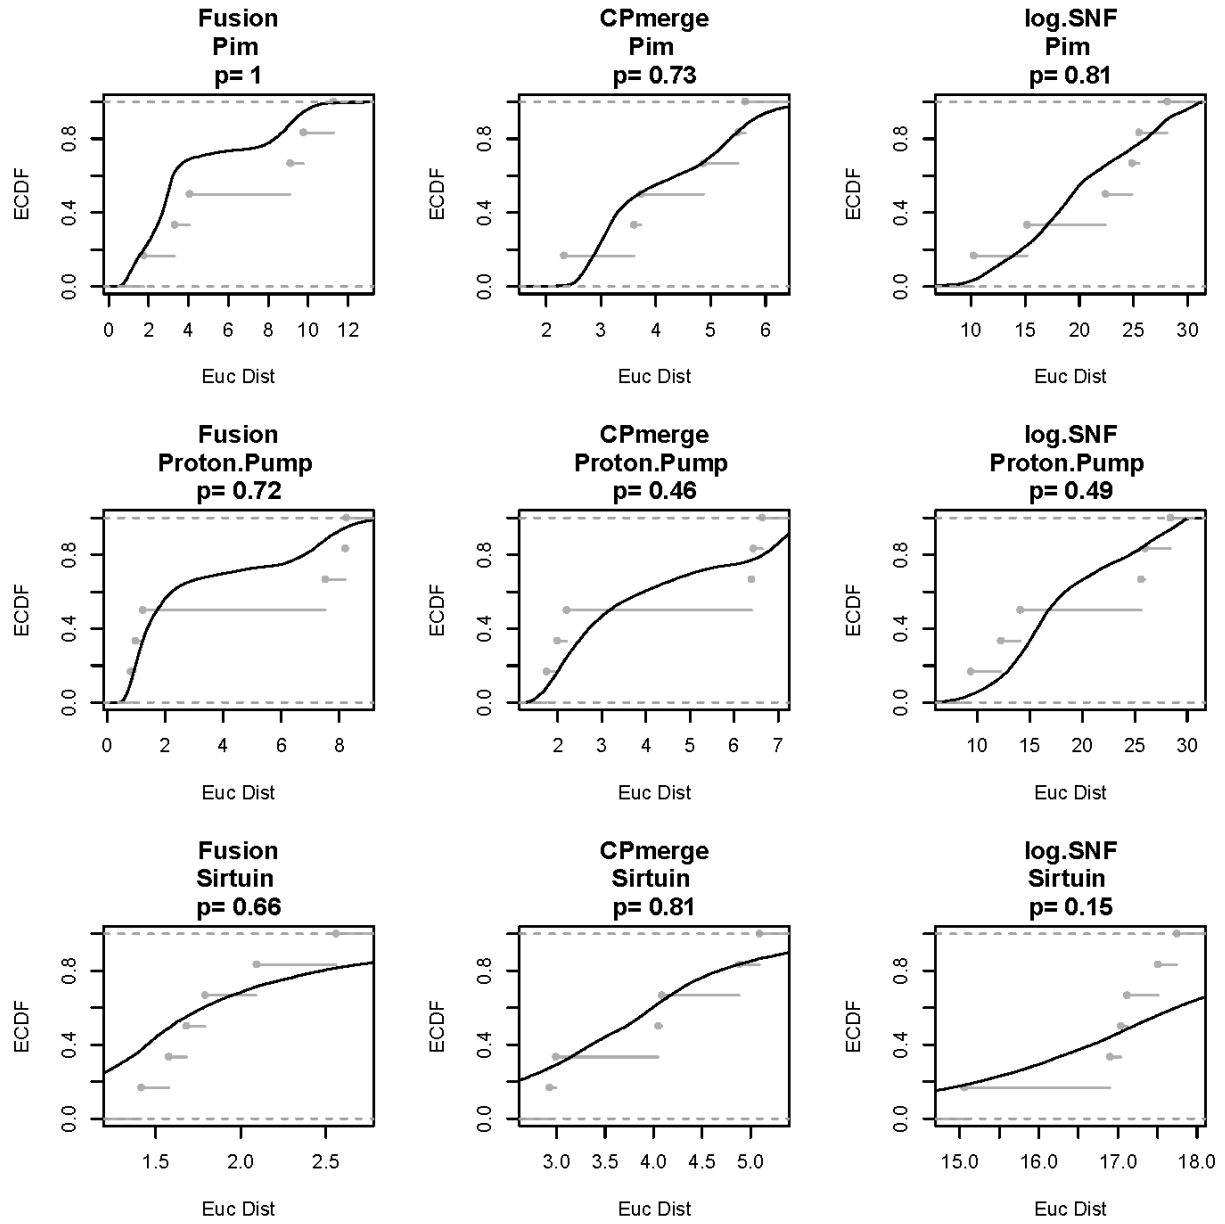



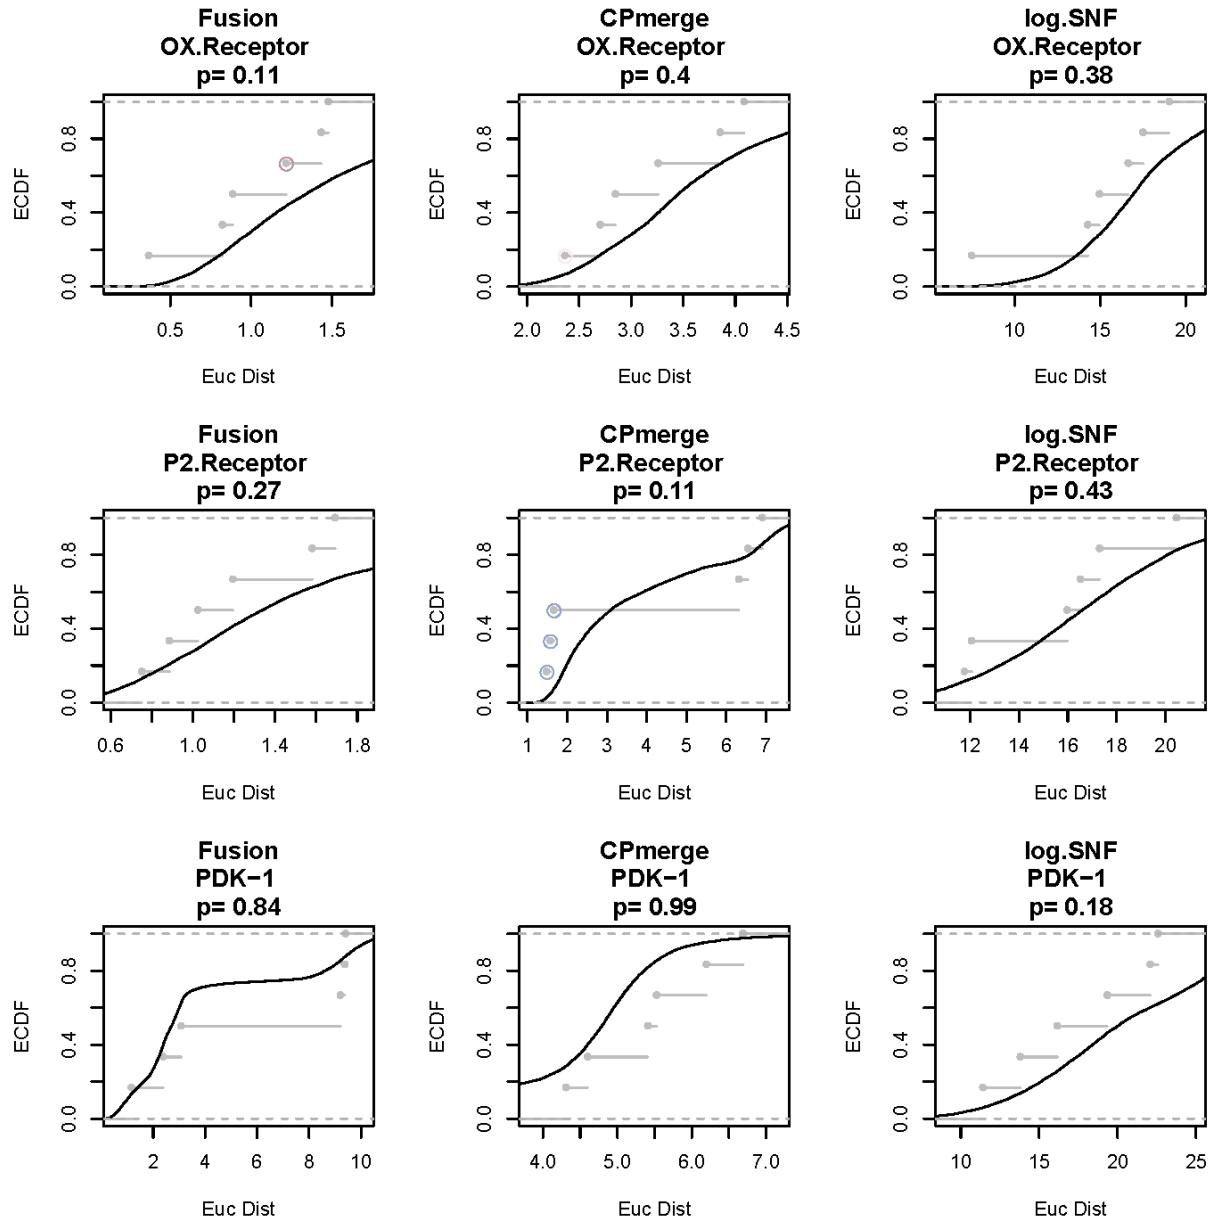

**b**

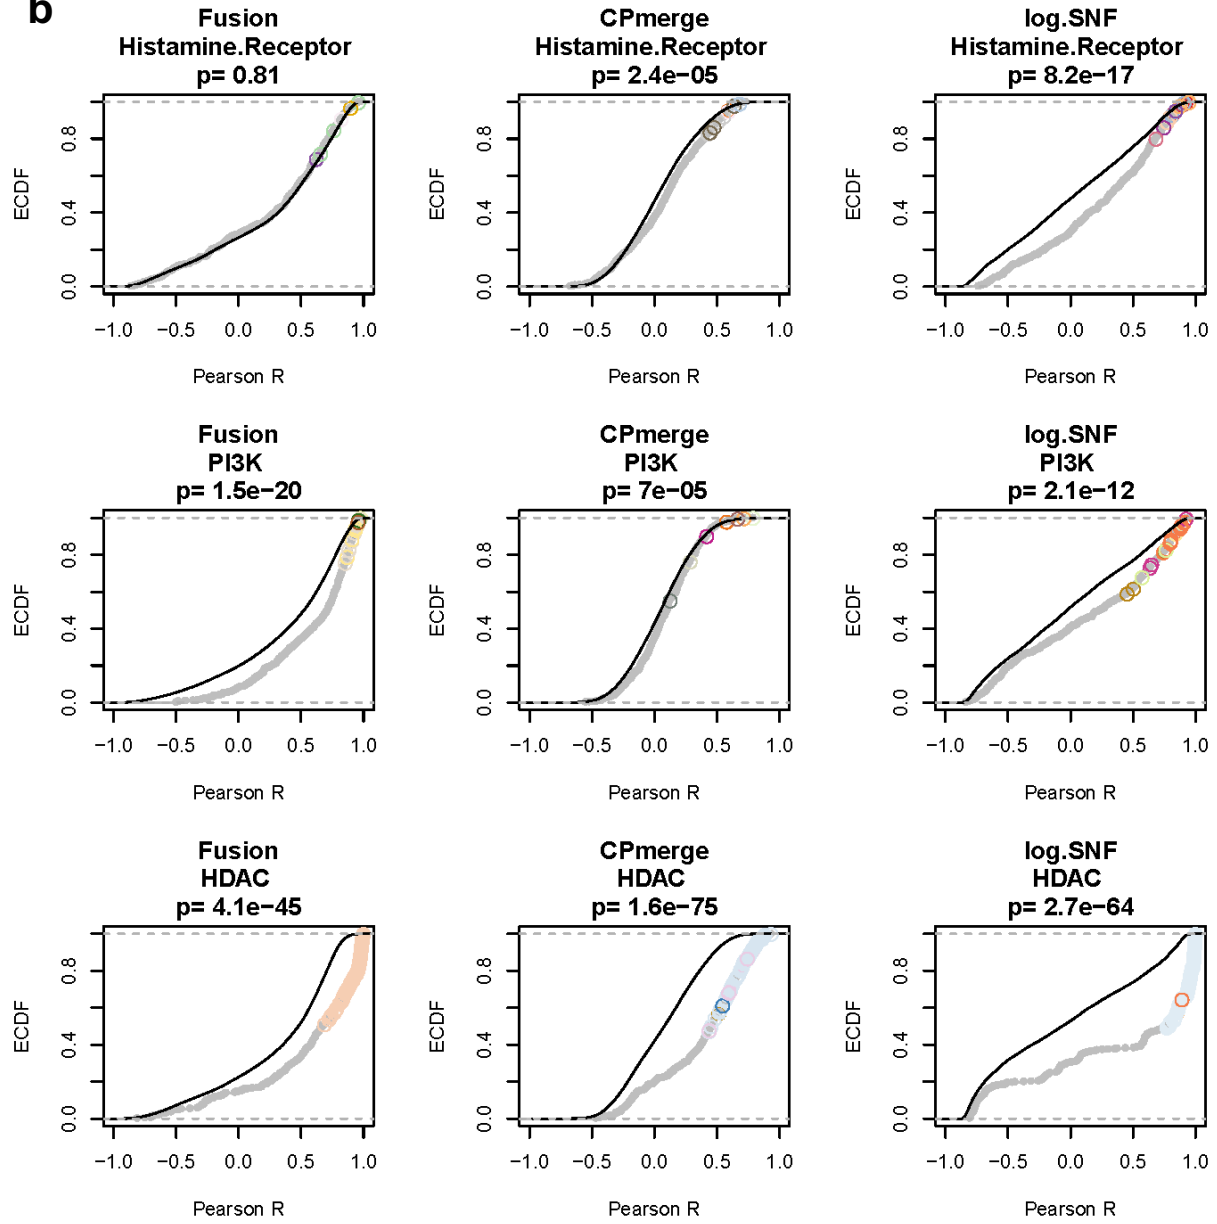

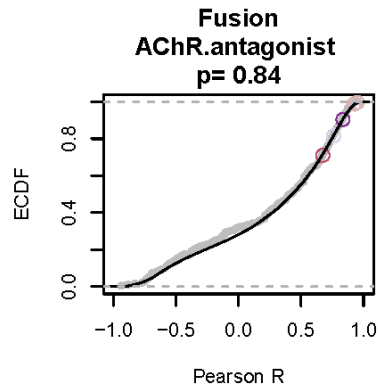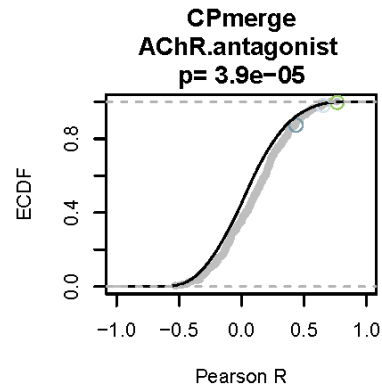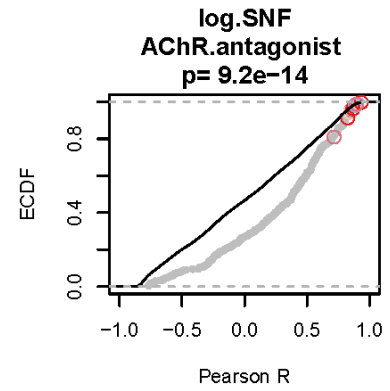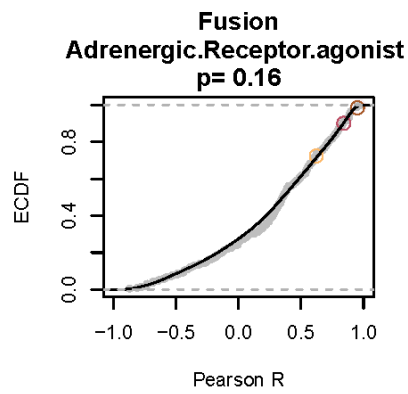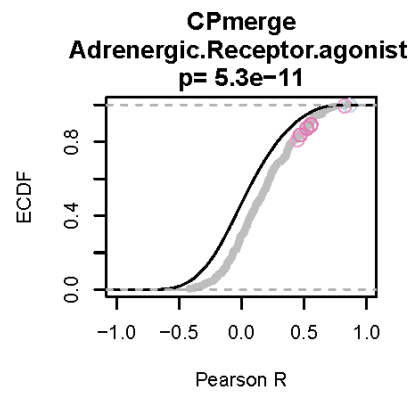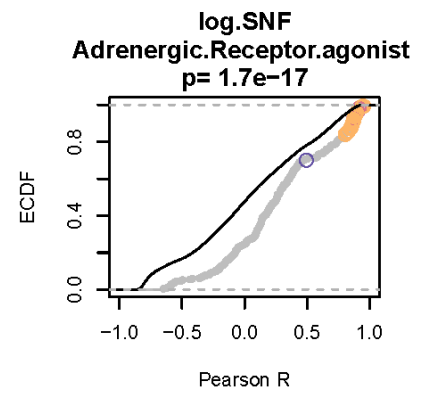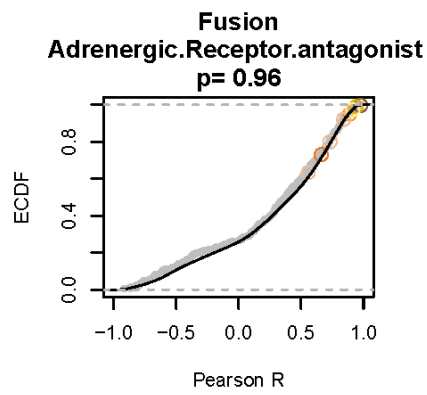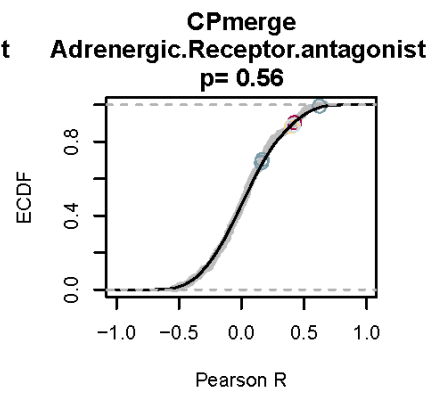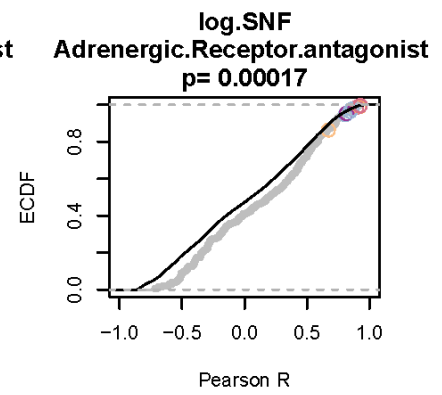

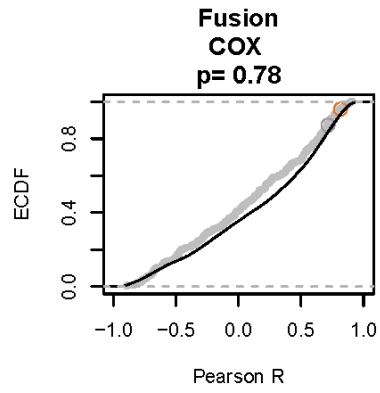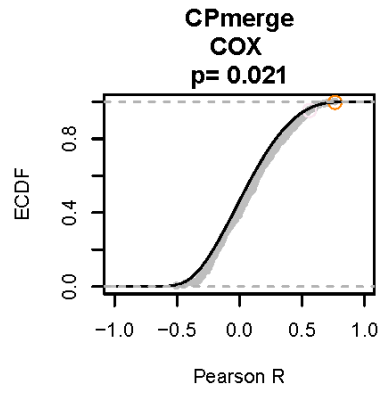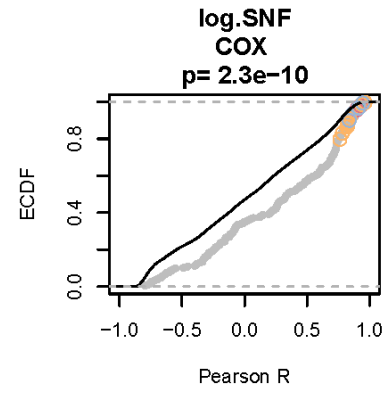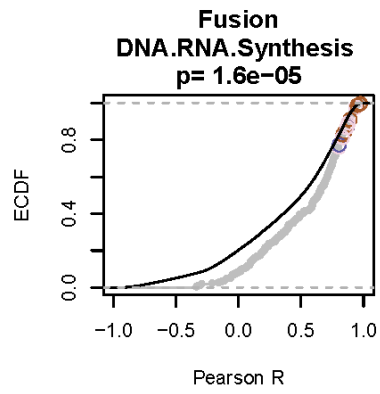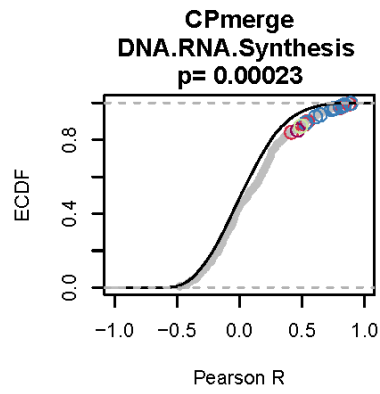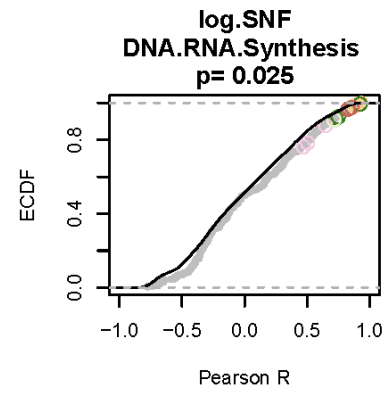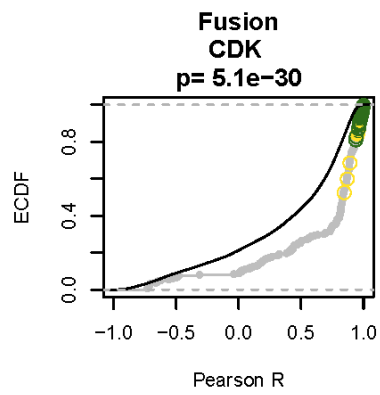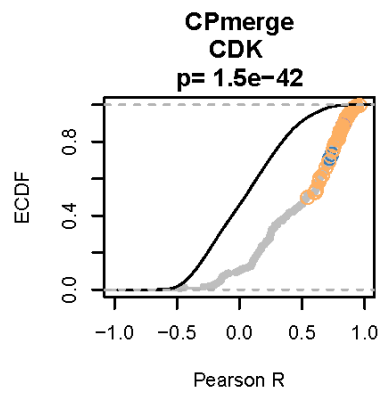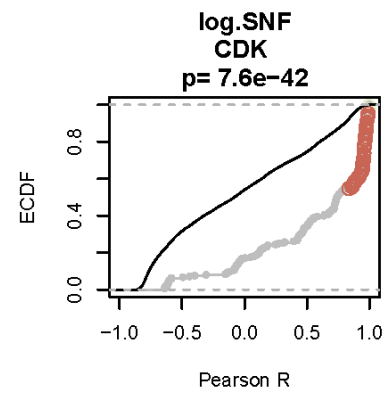

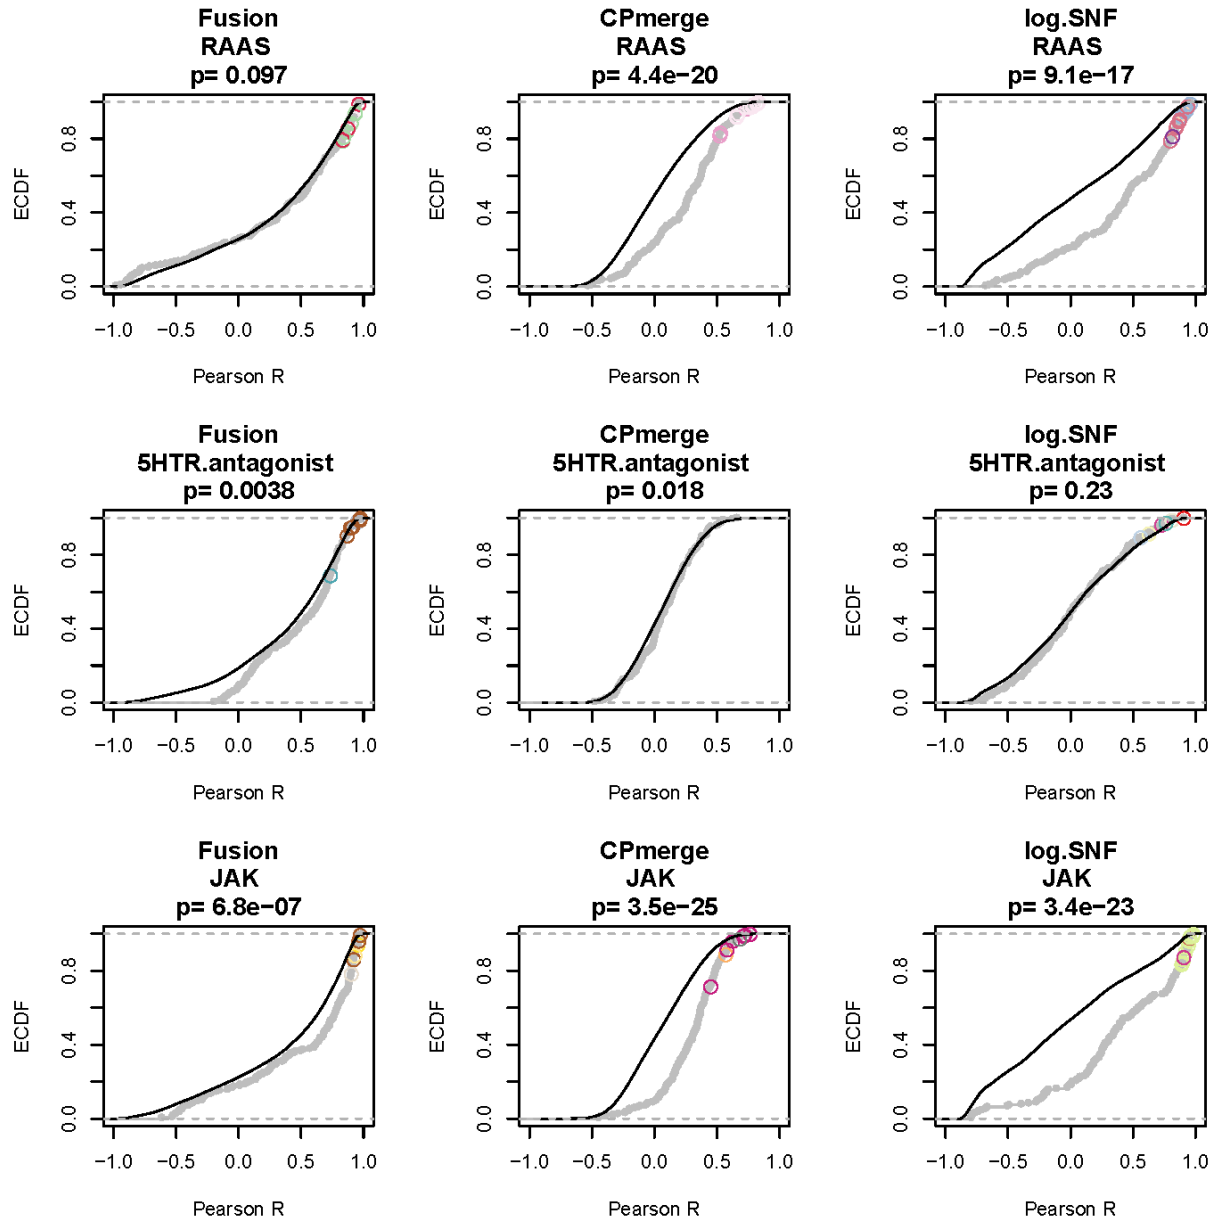

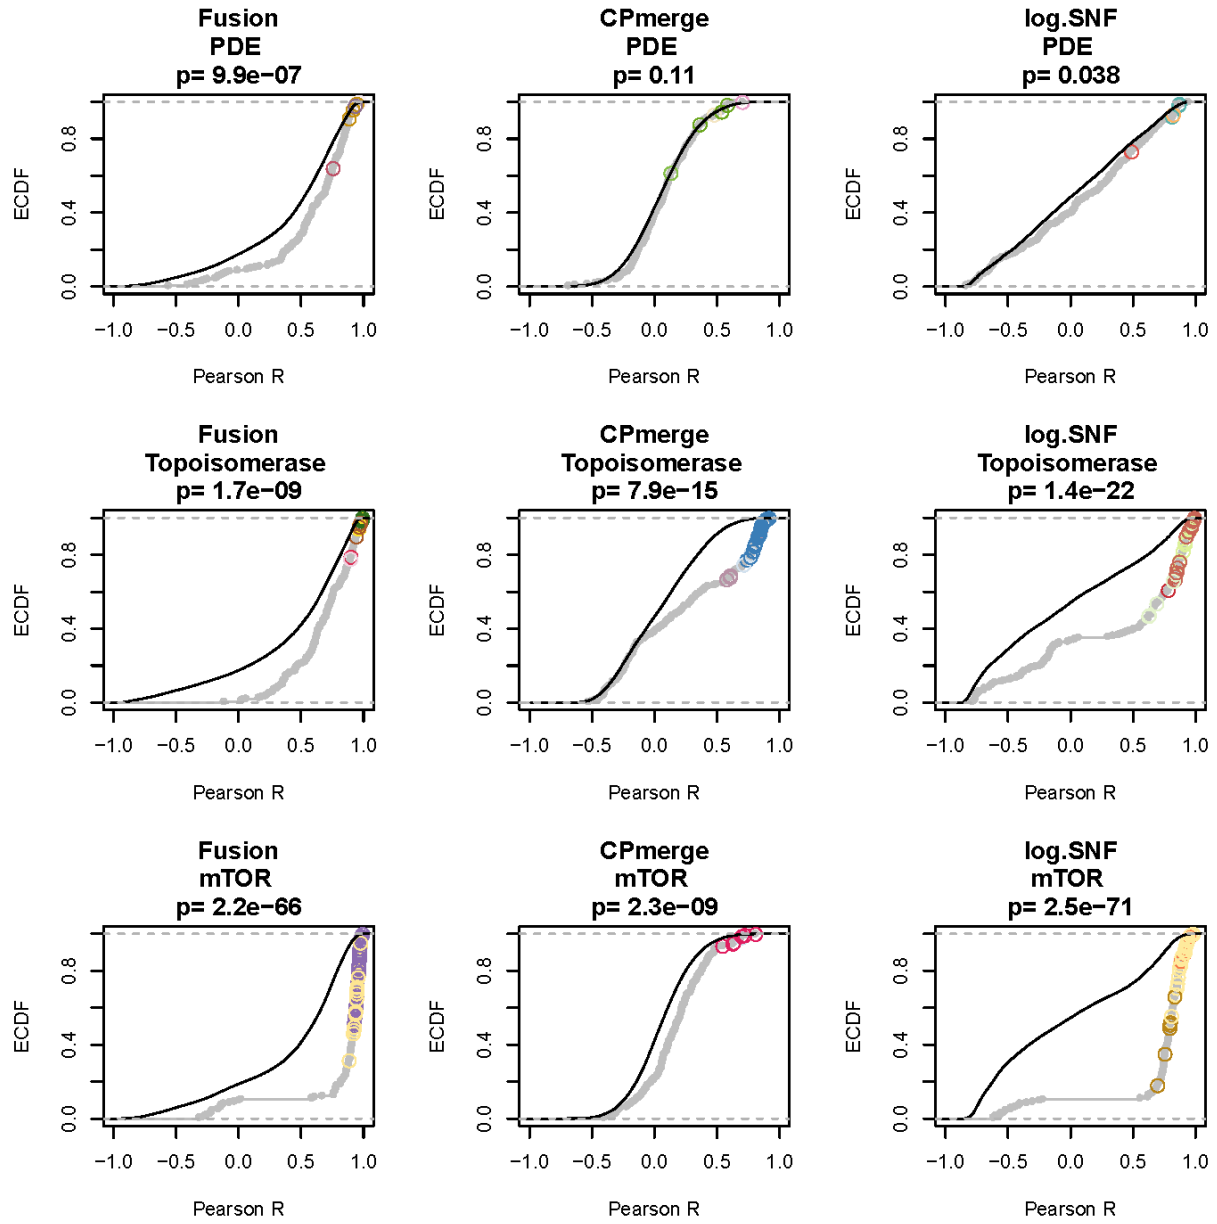

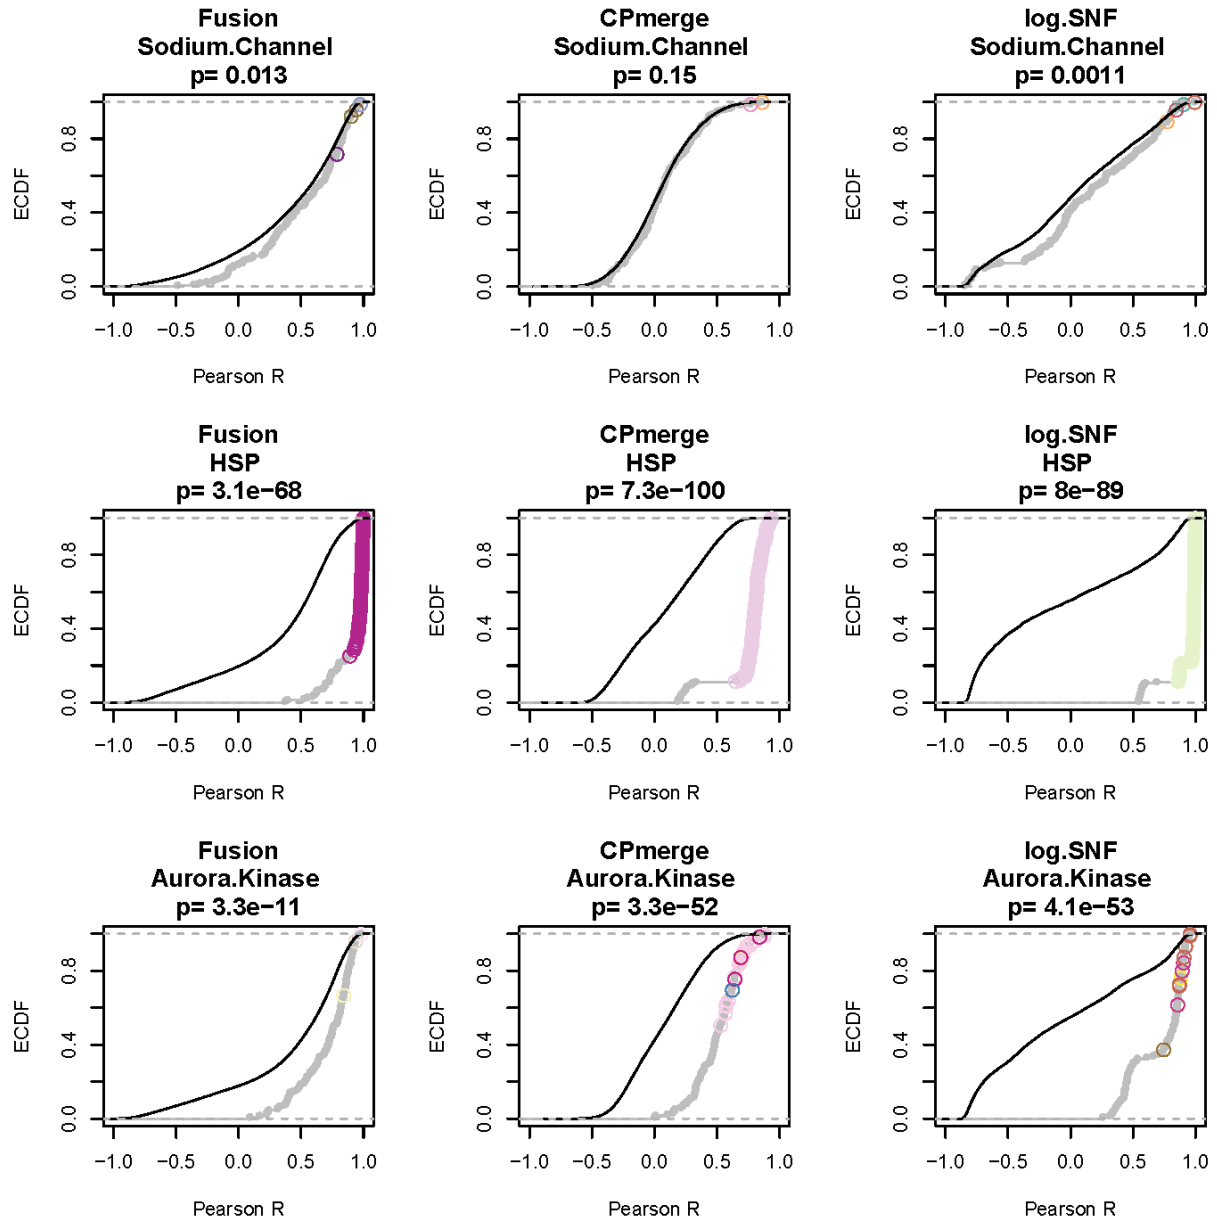

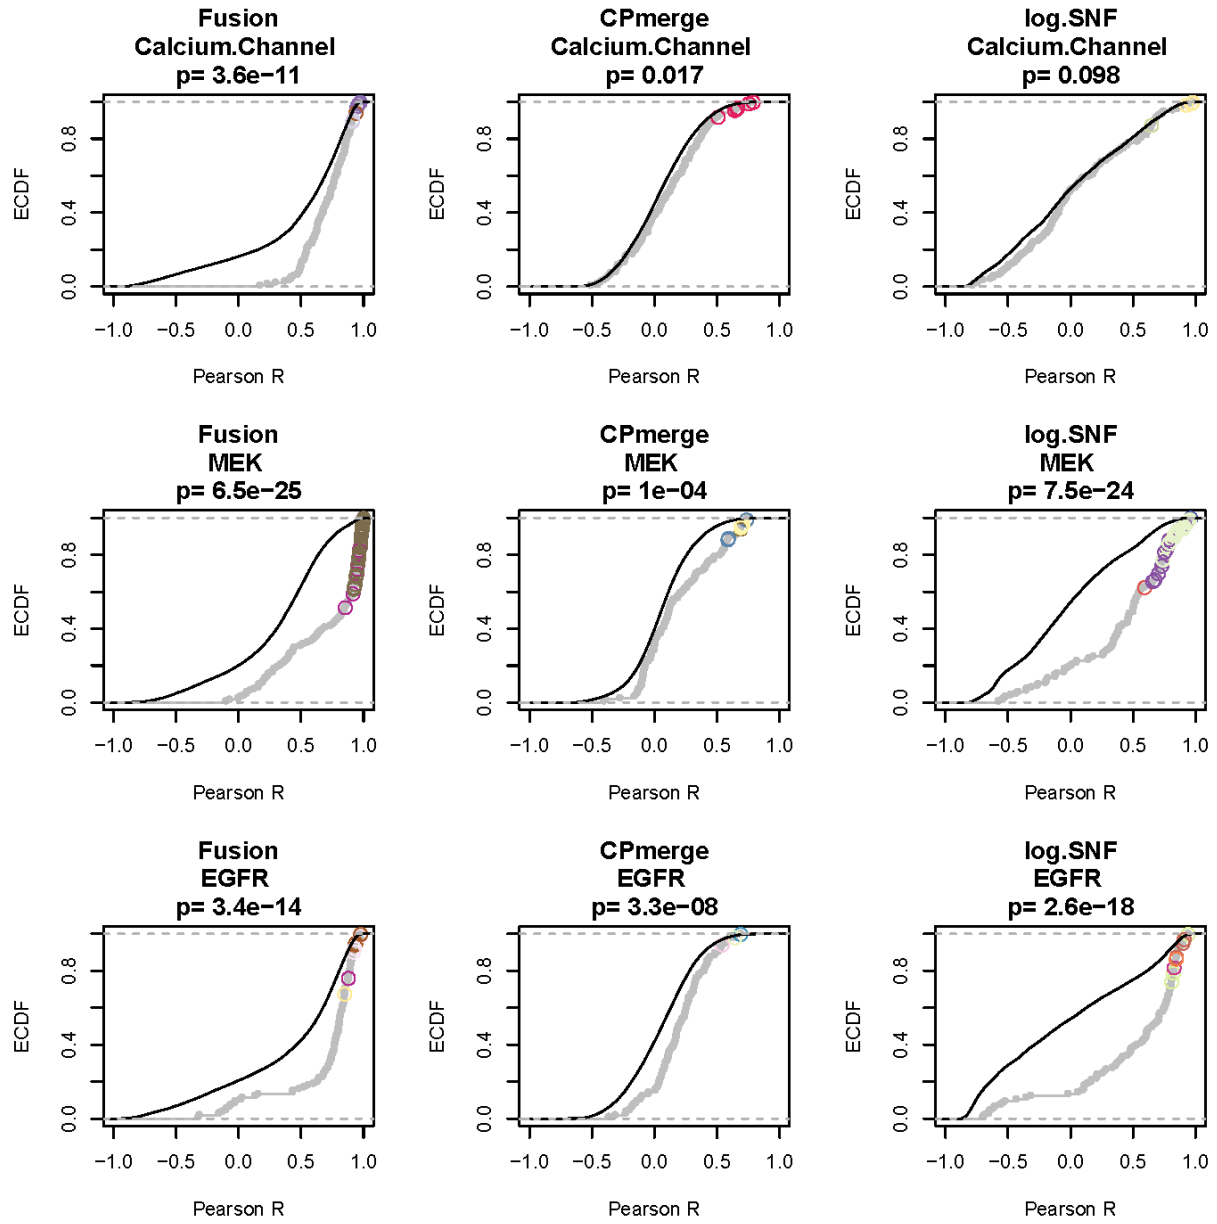



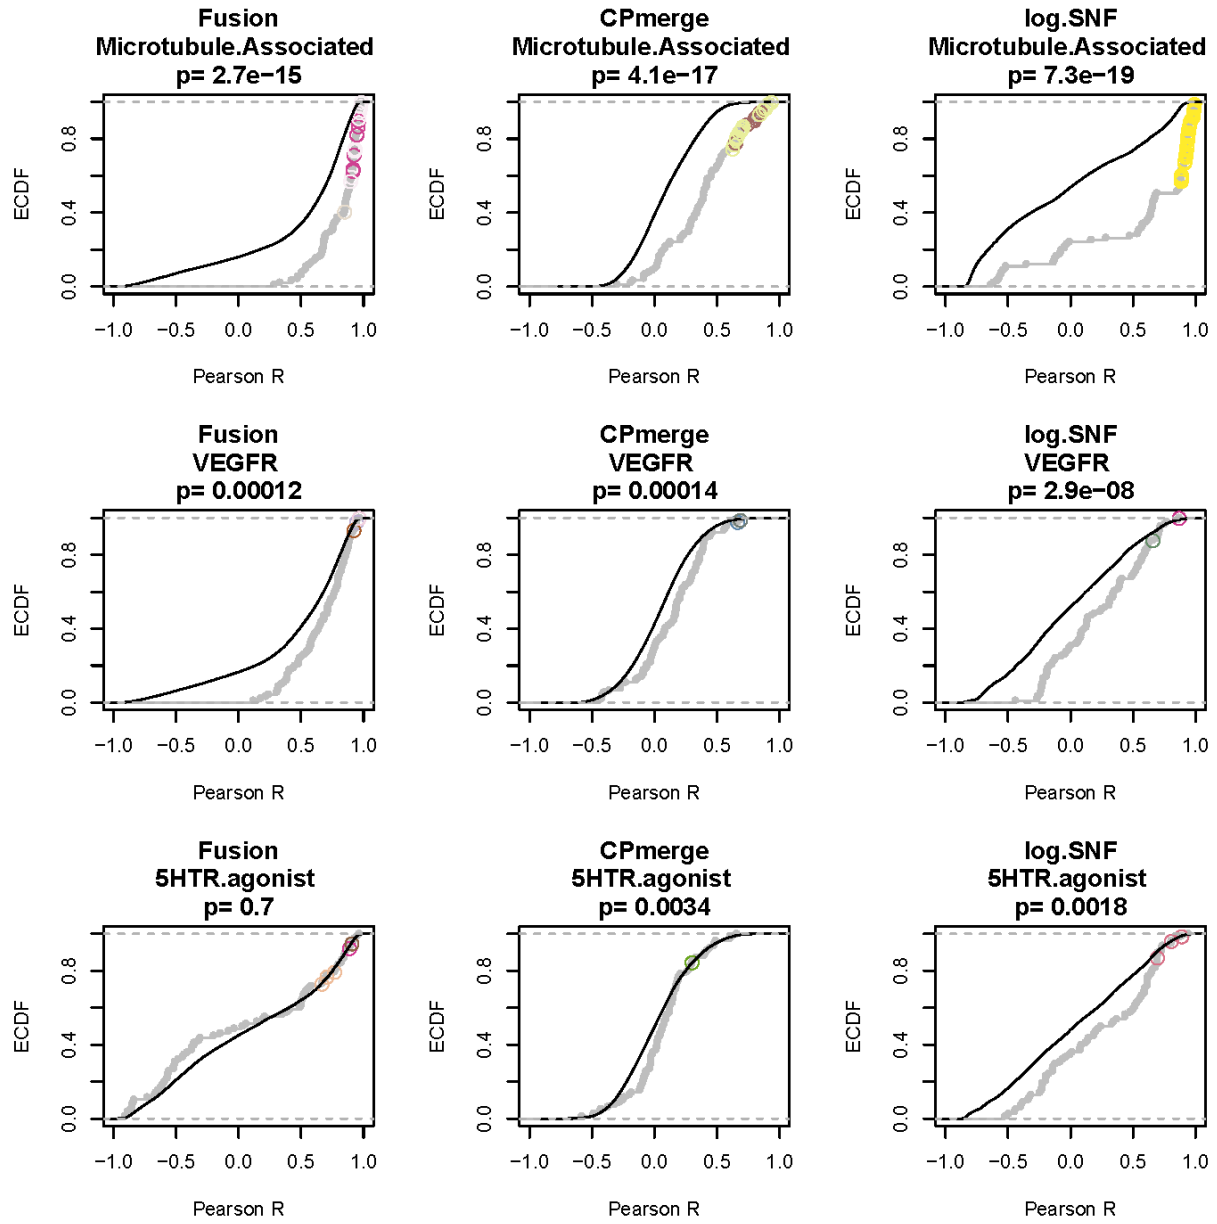

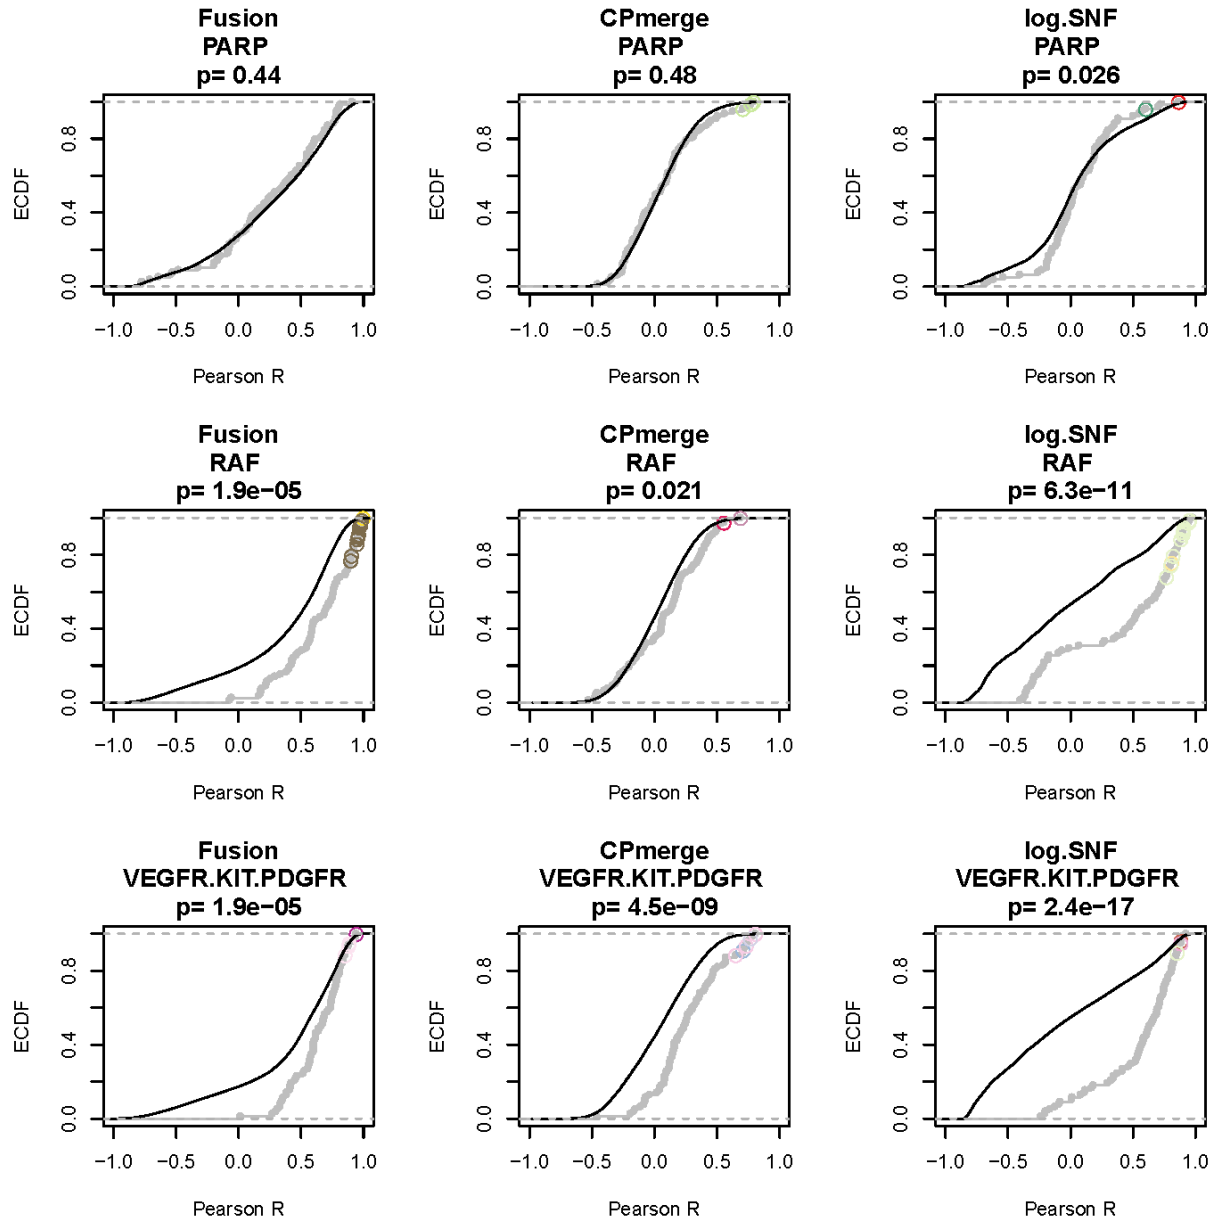

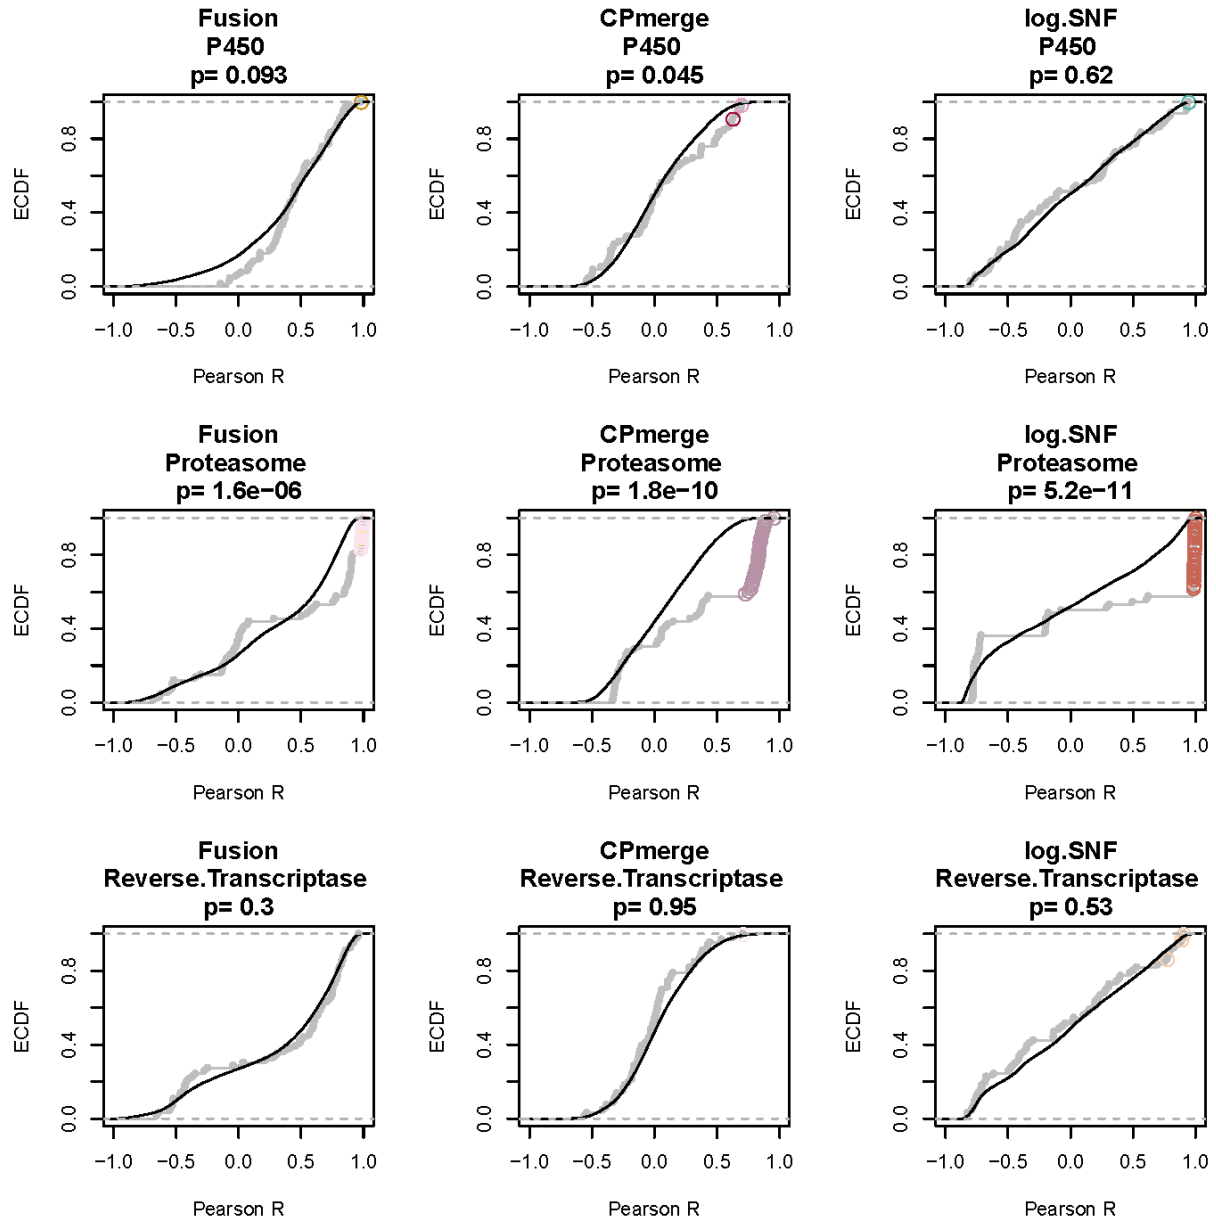

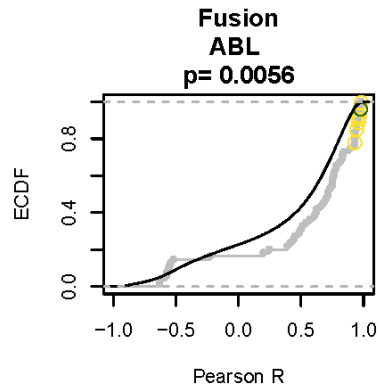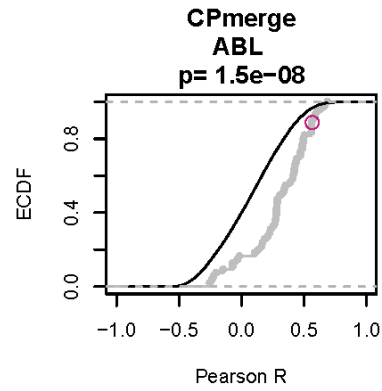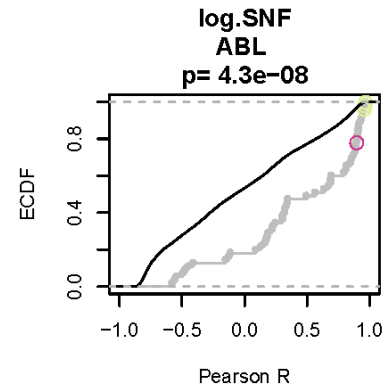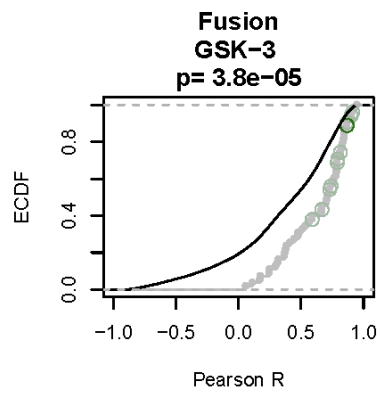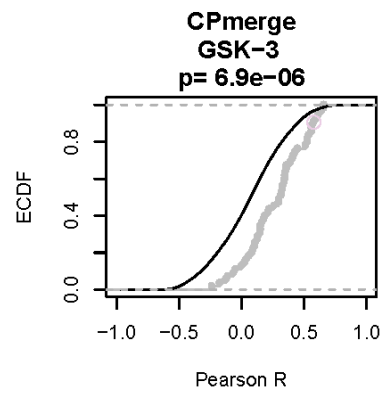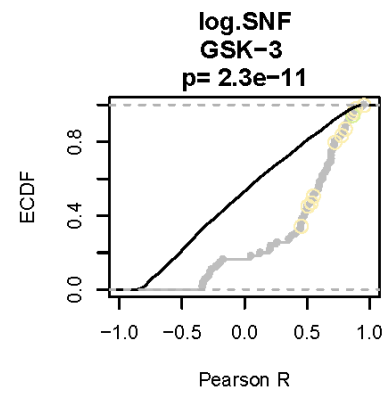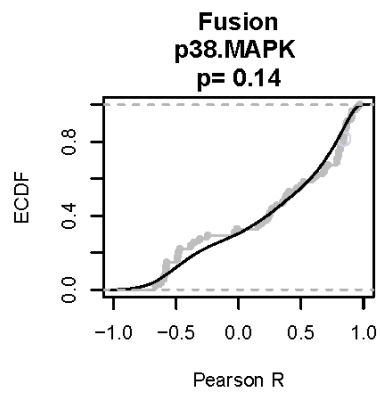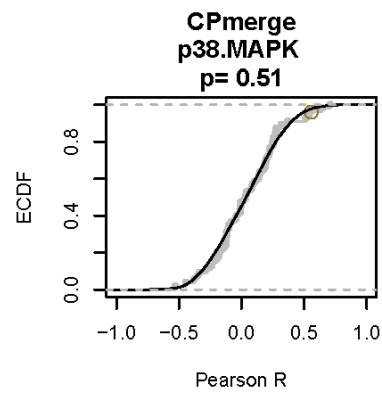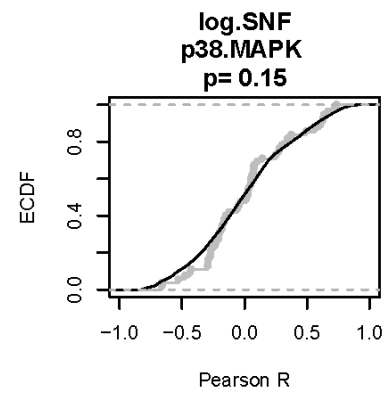

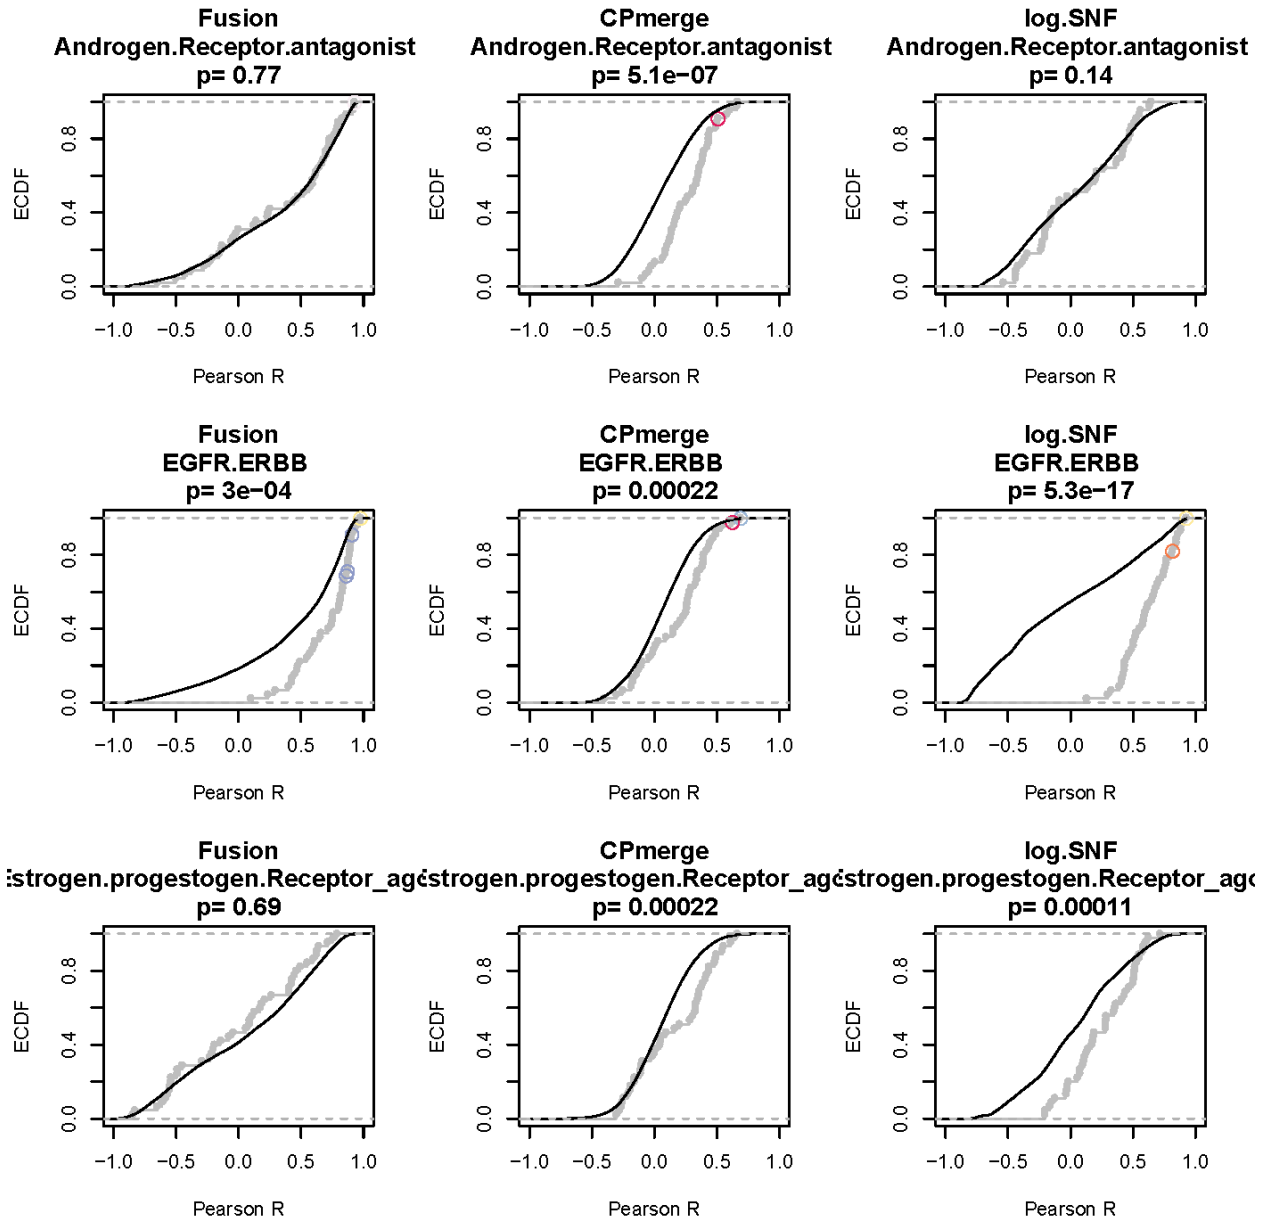

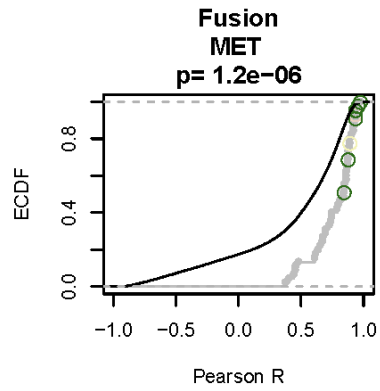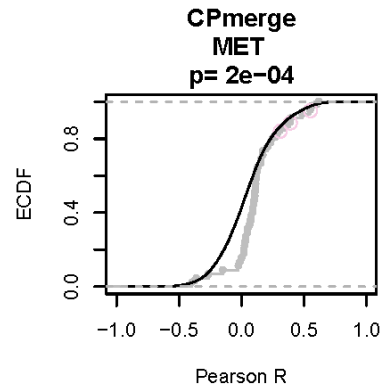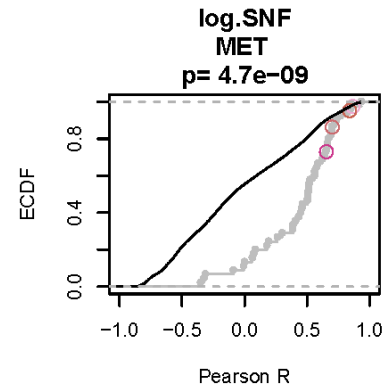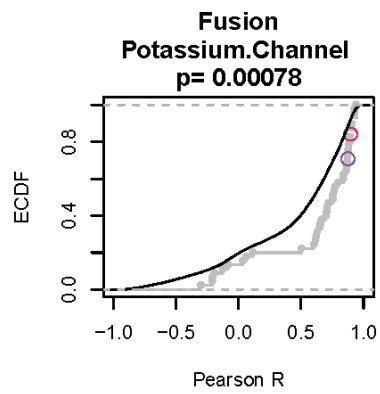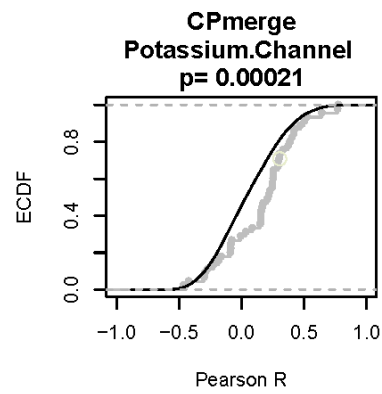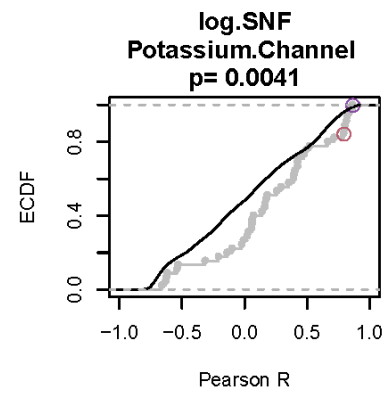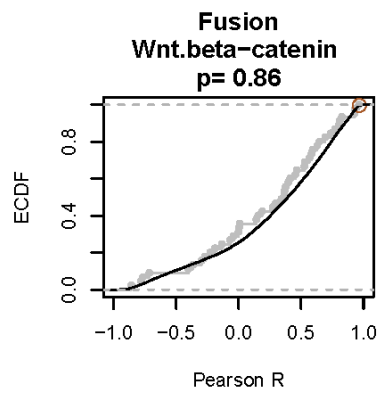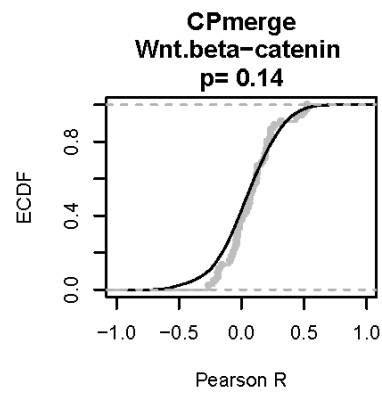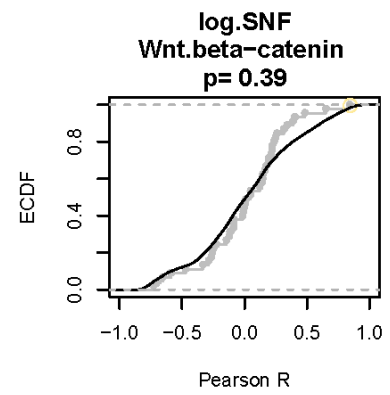

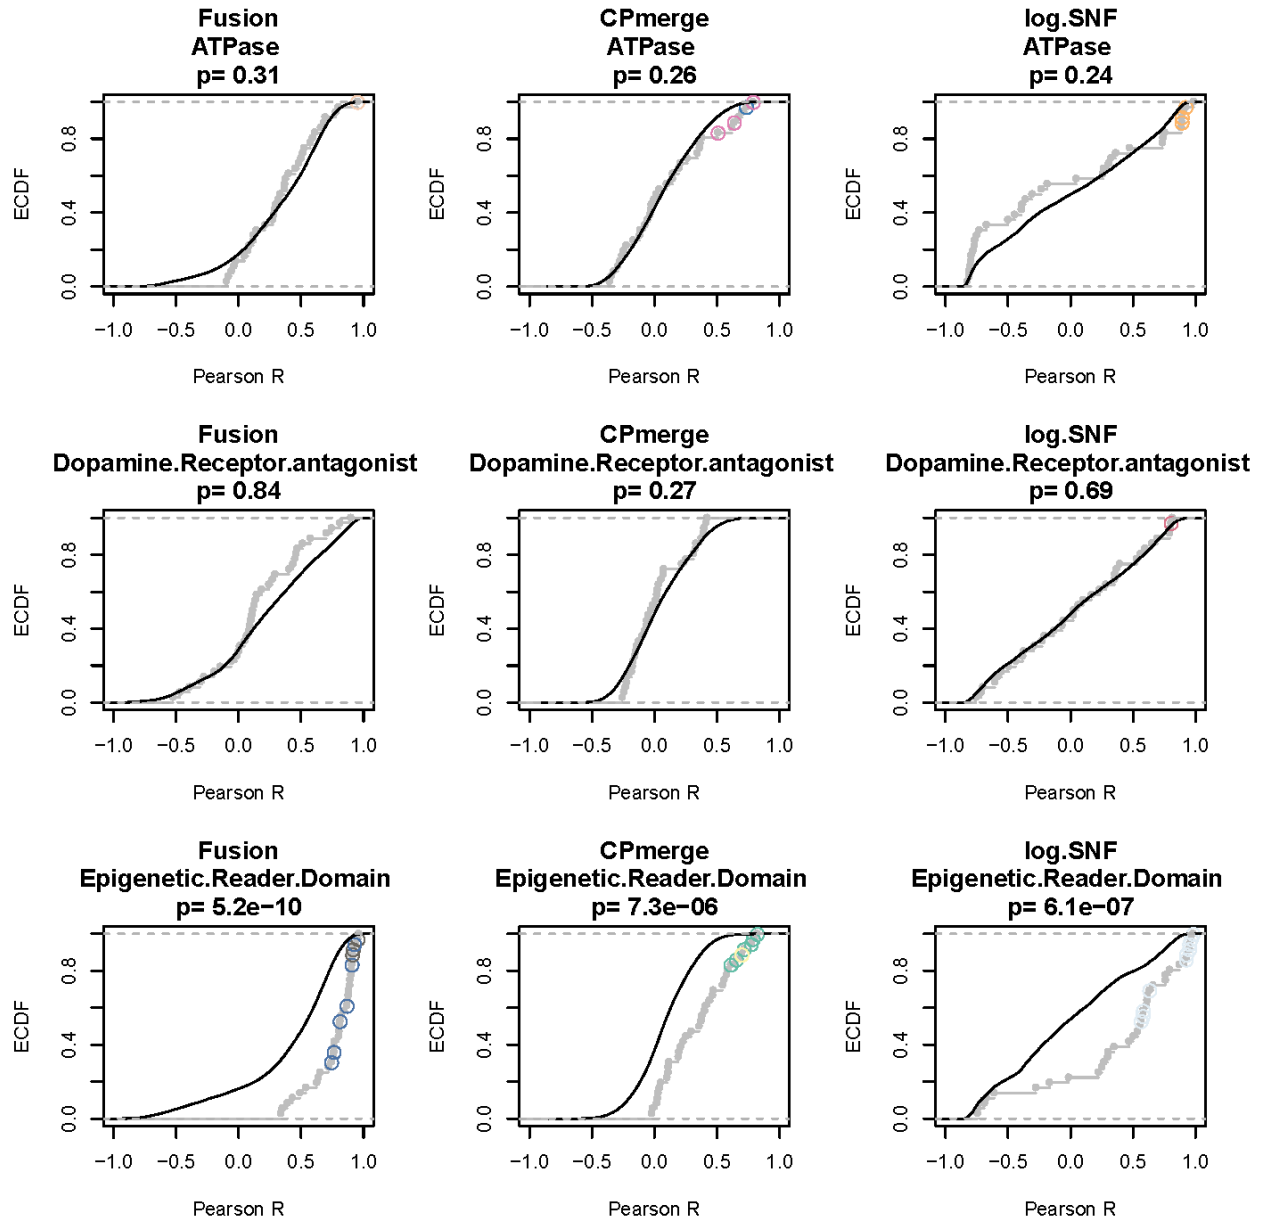

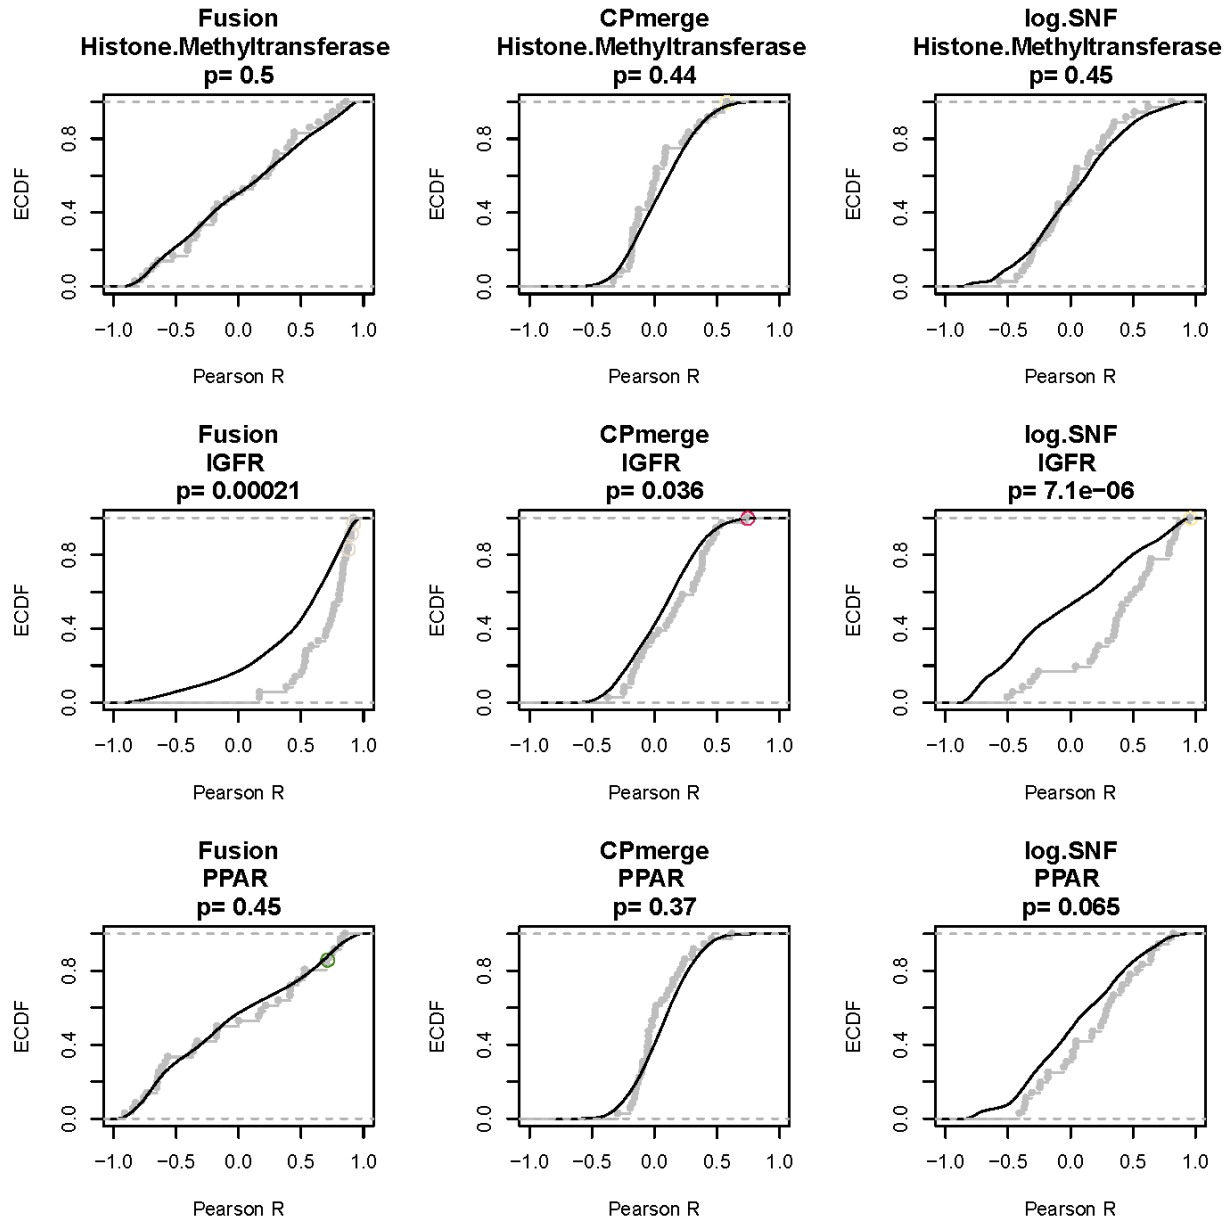



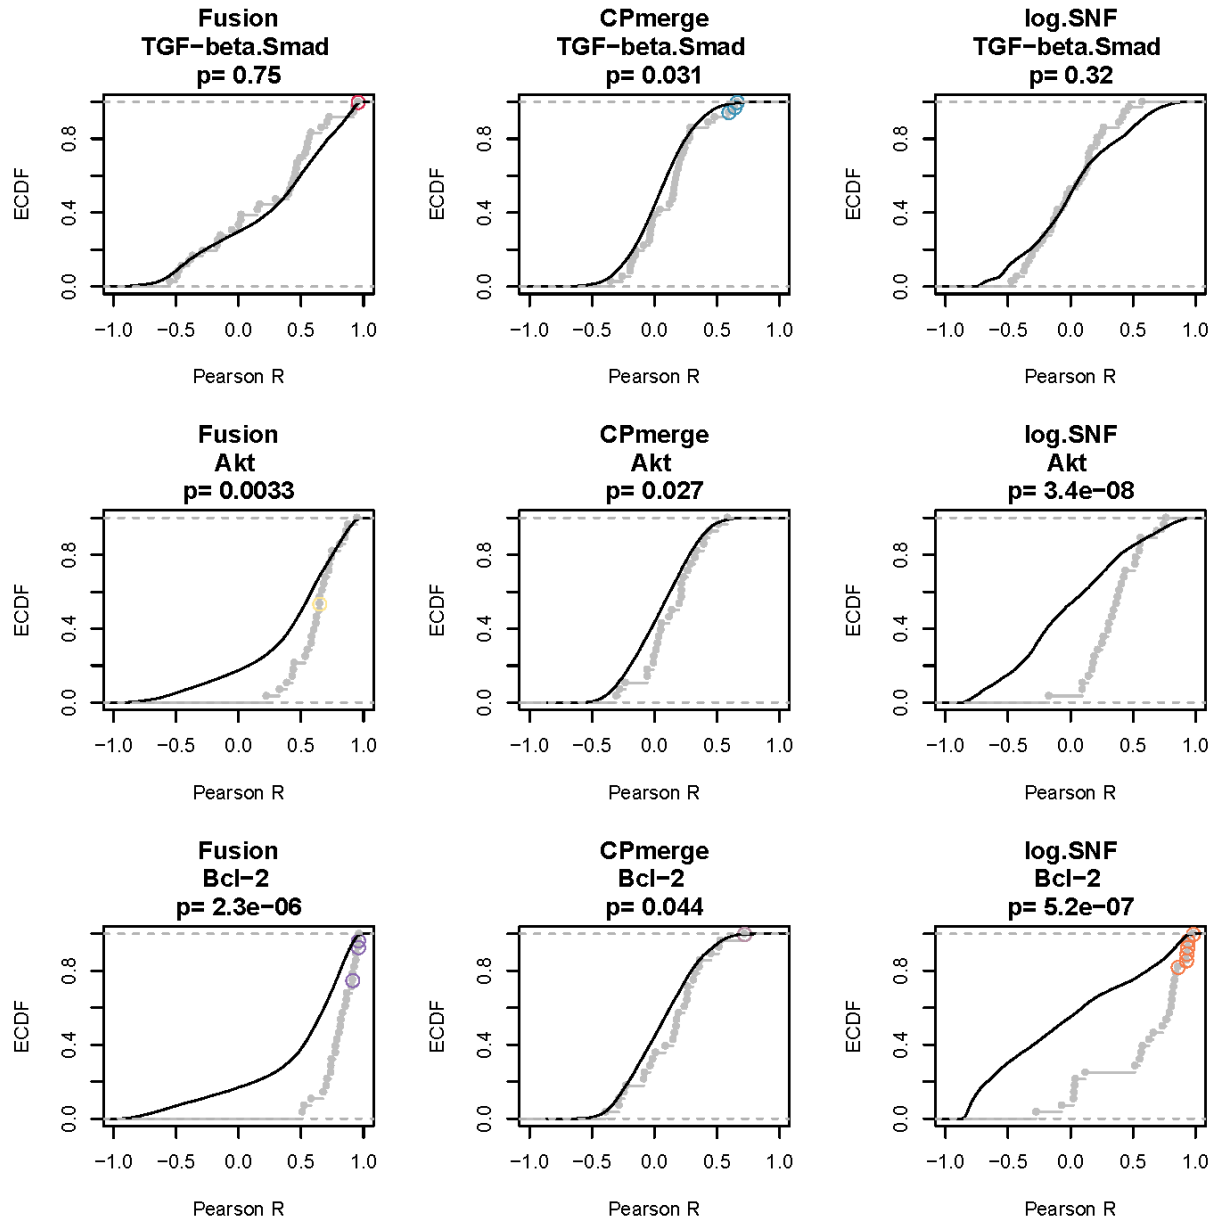

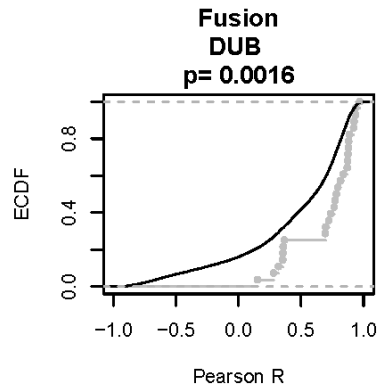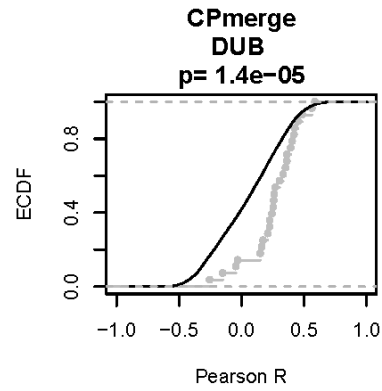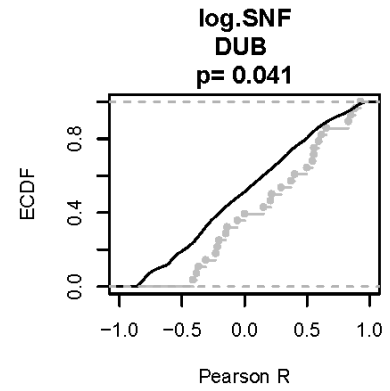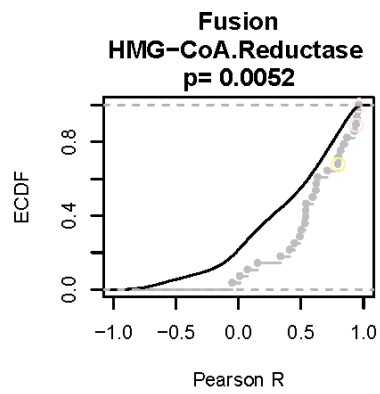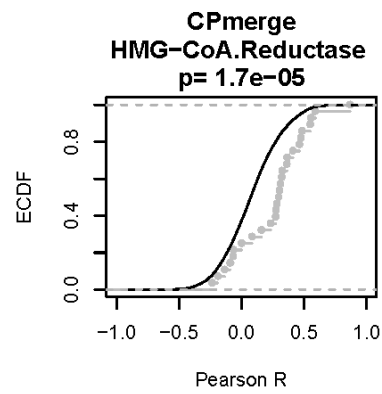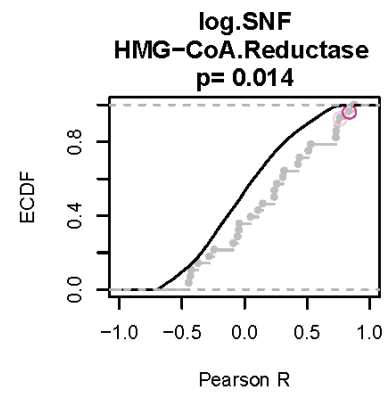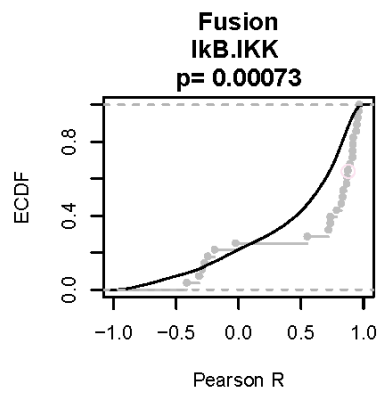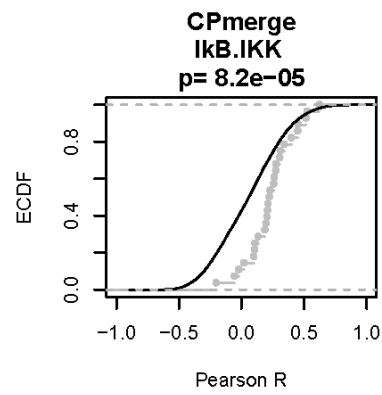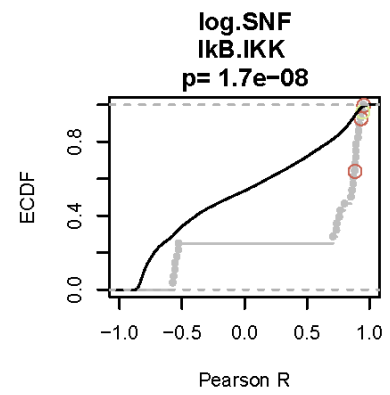

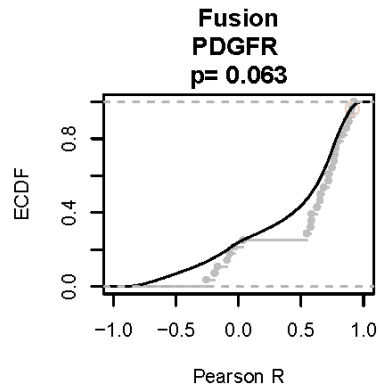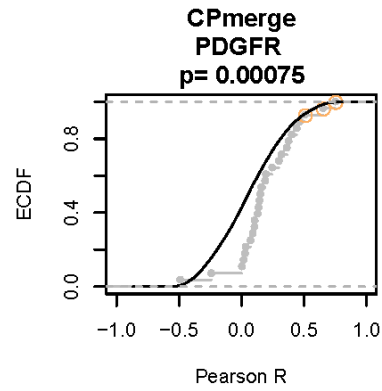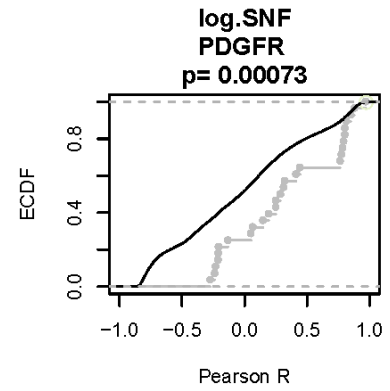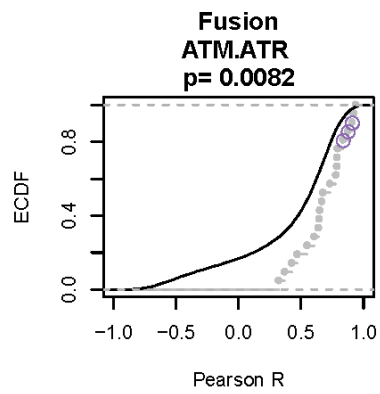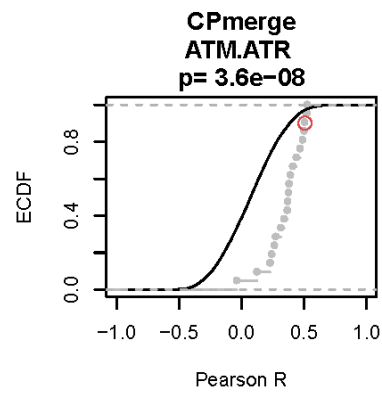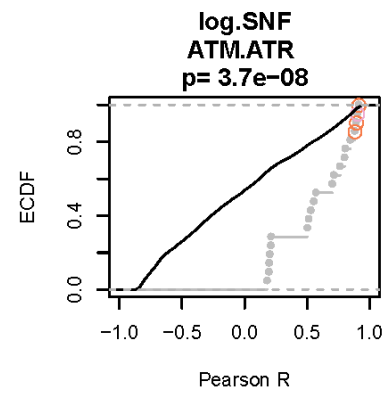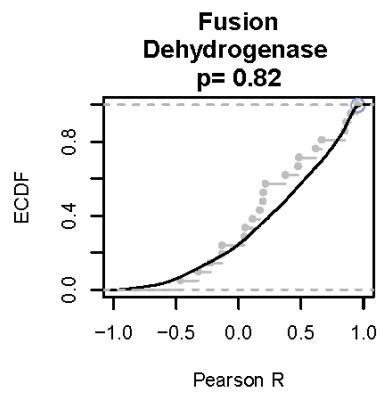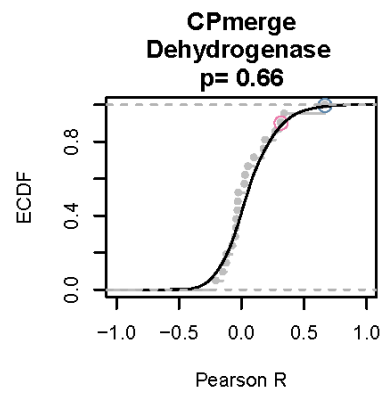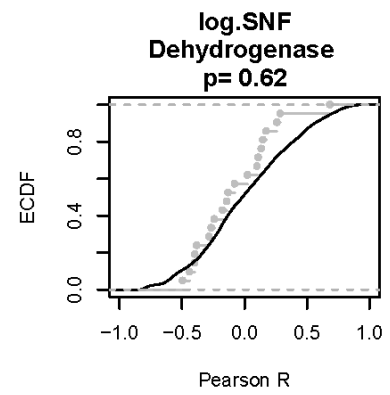

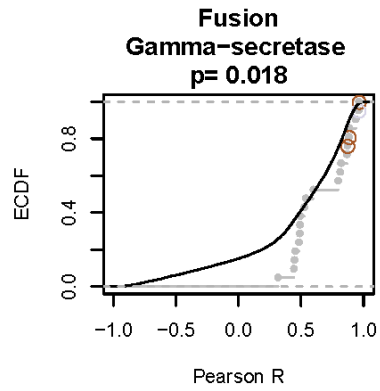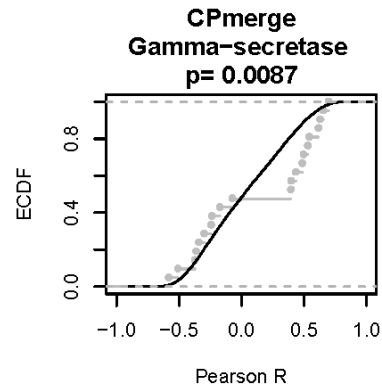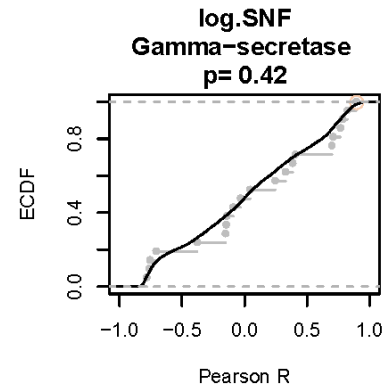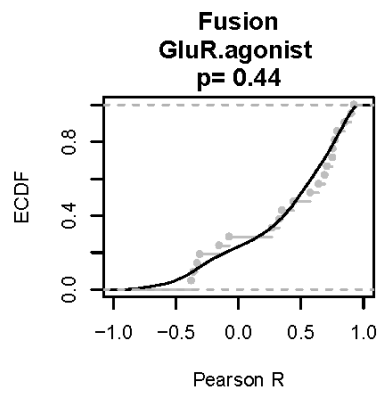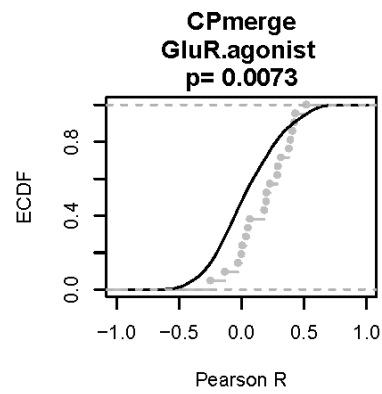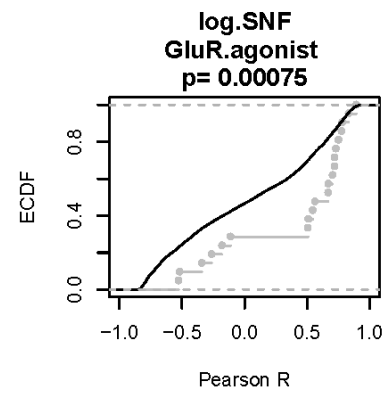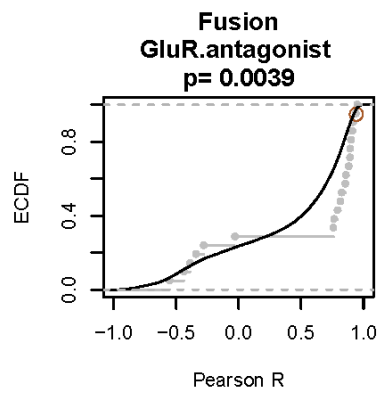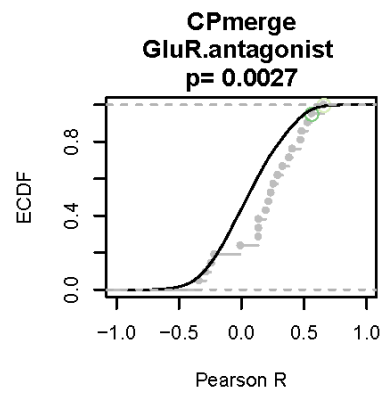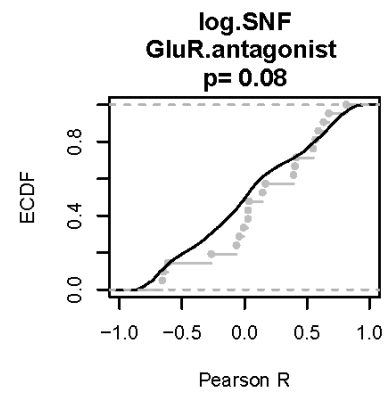



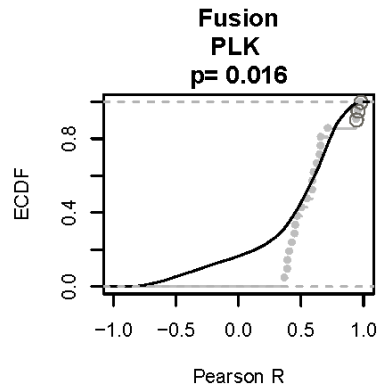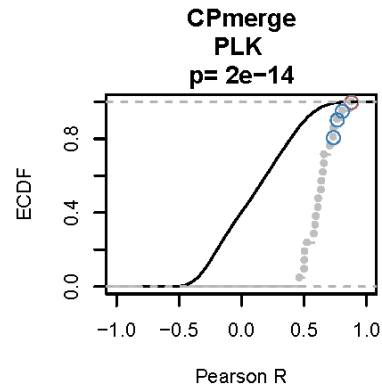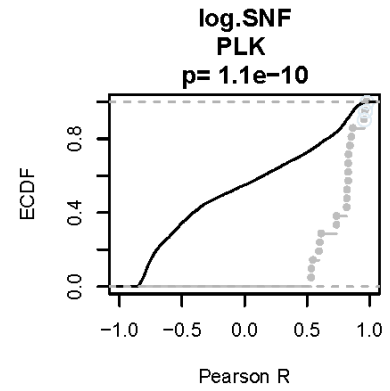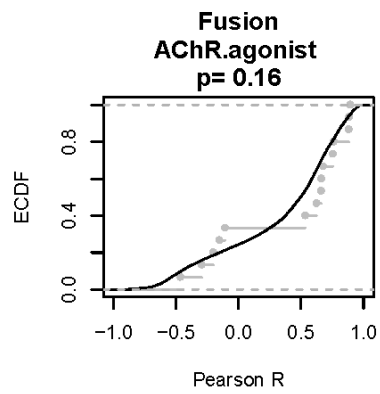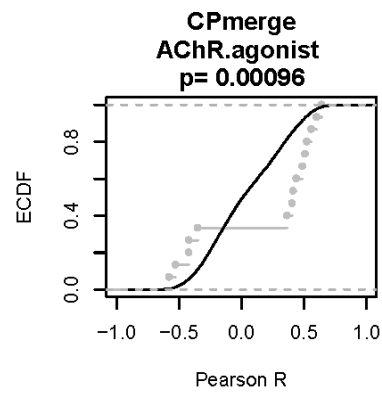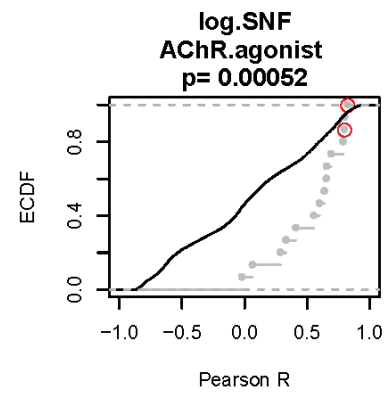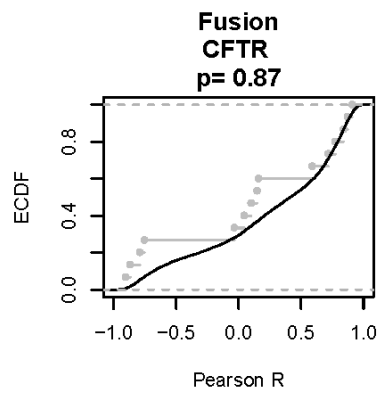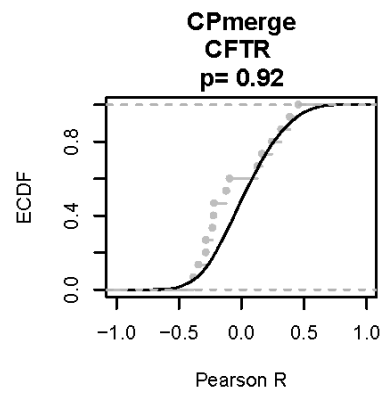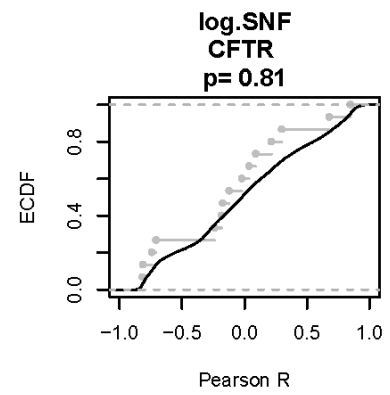

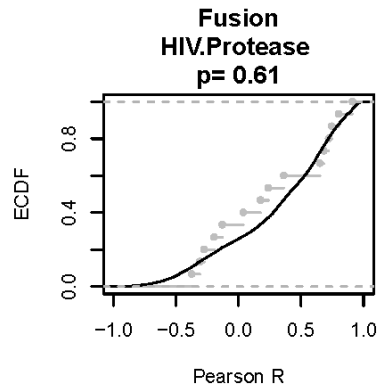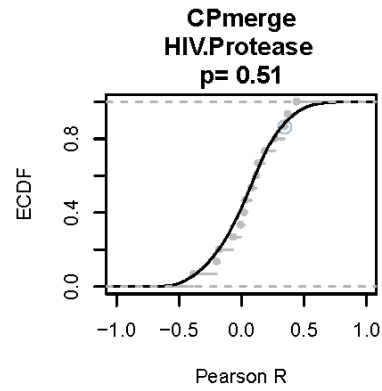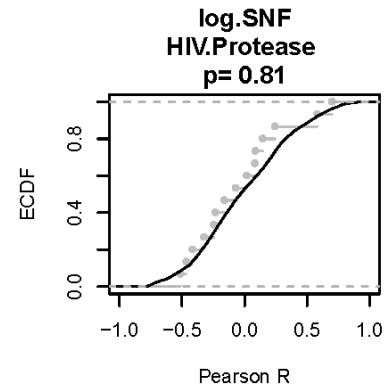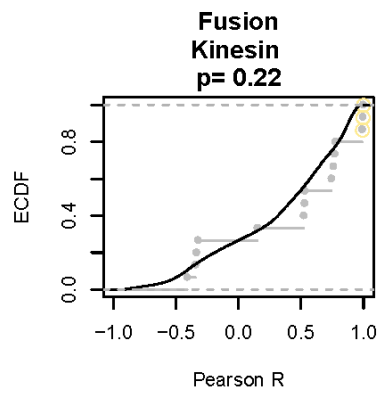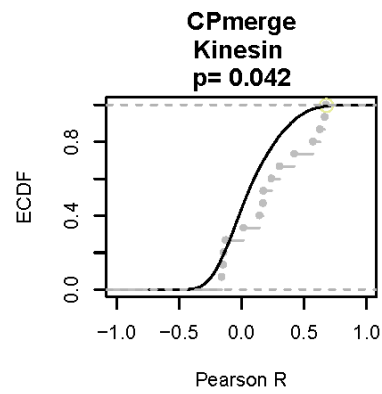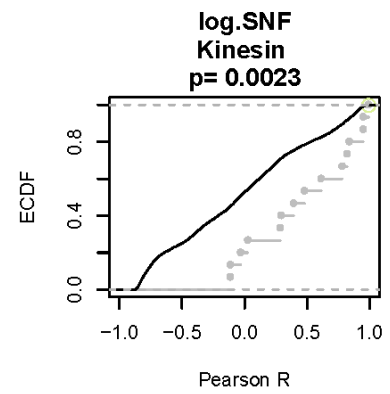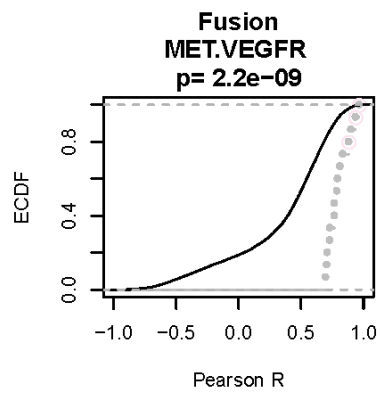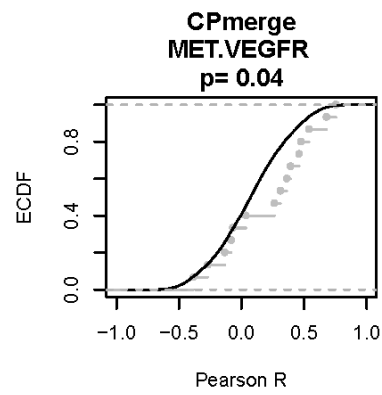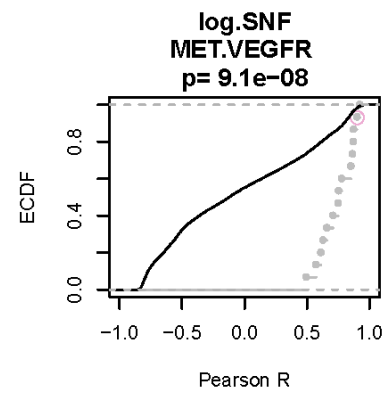

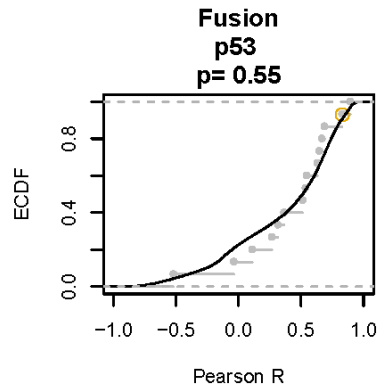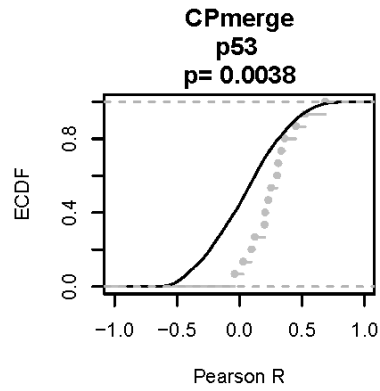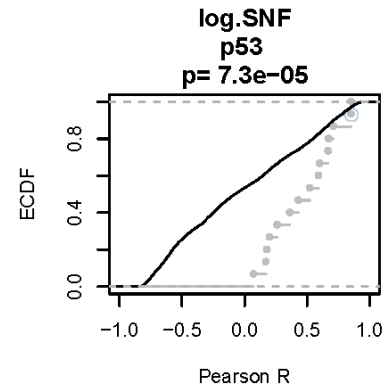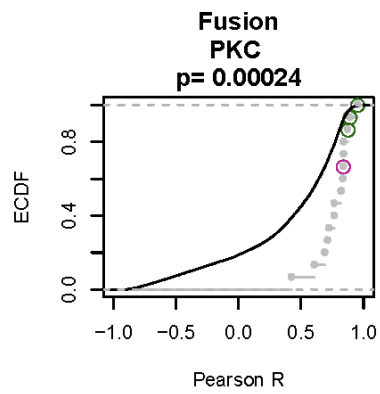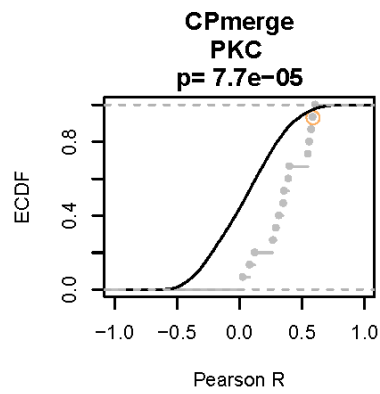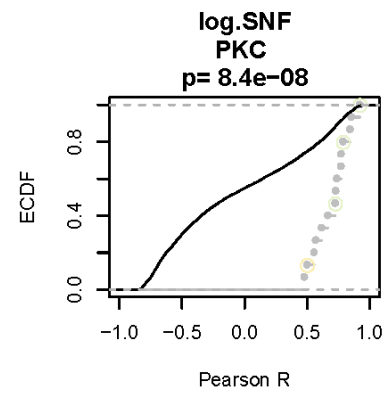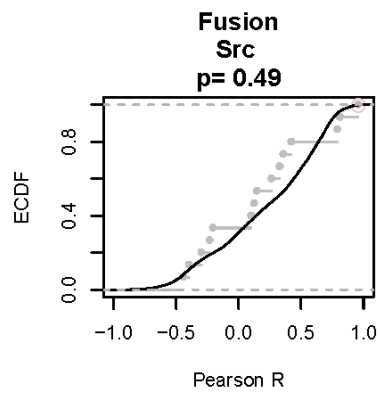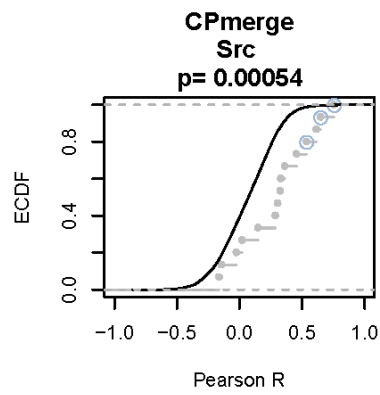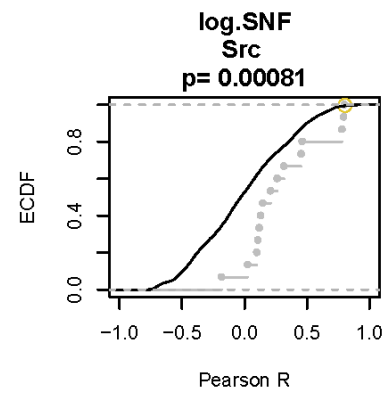



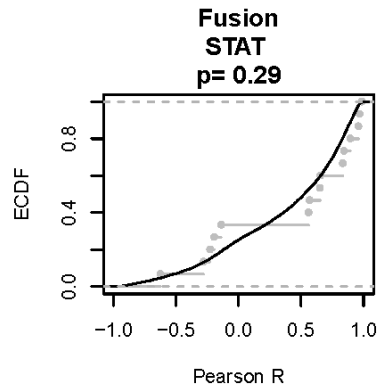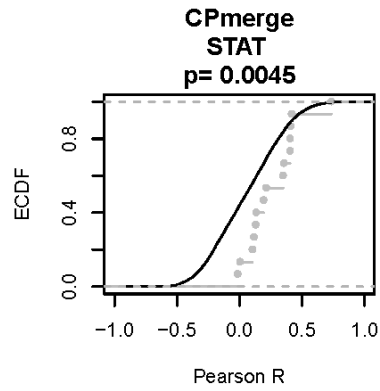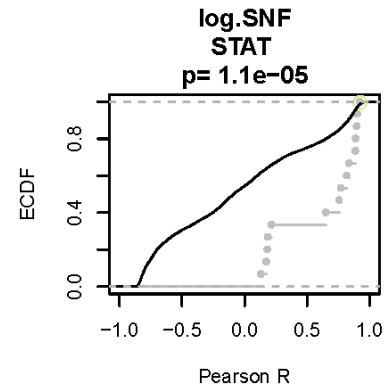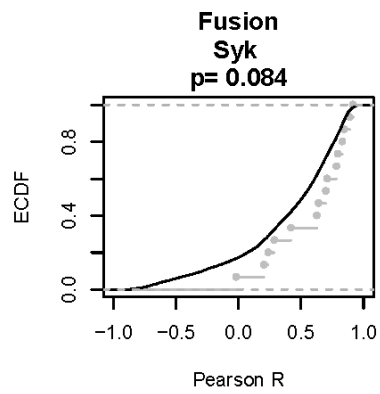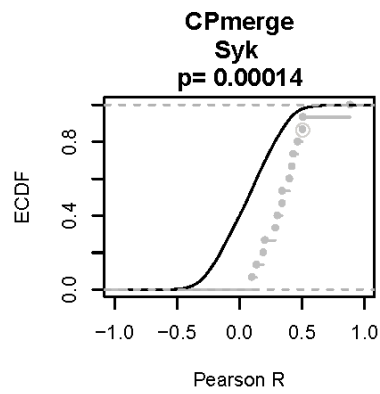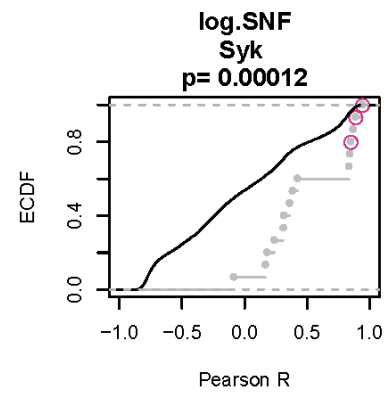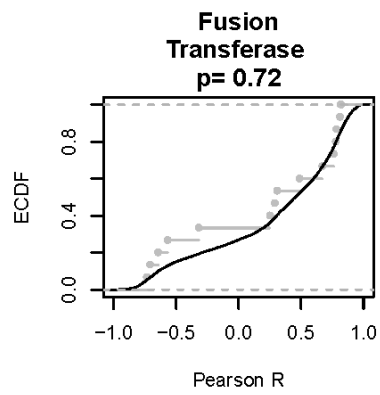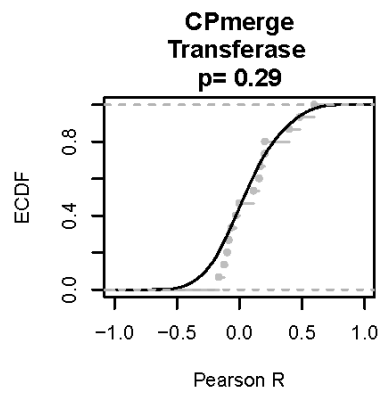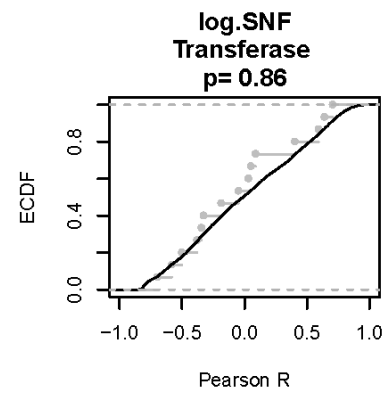

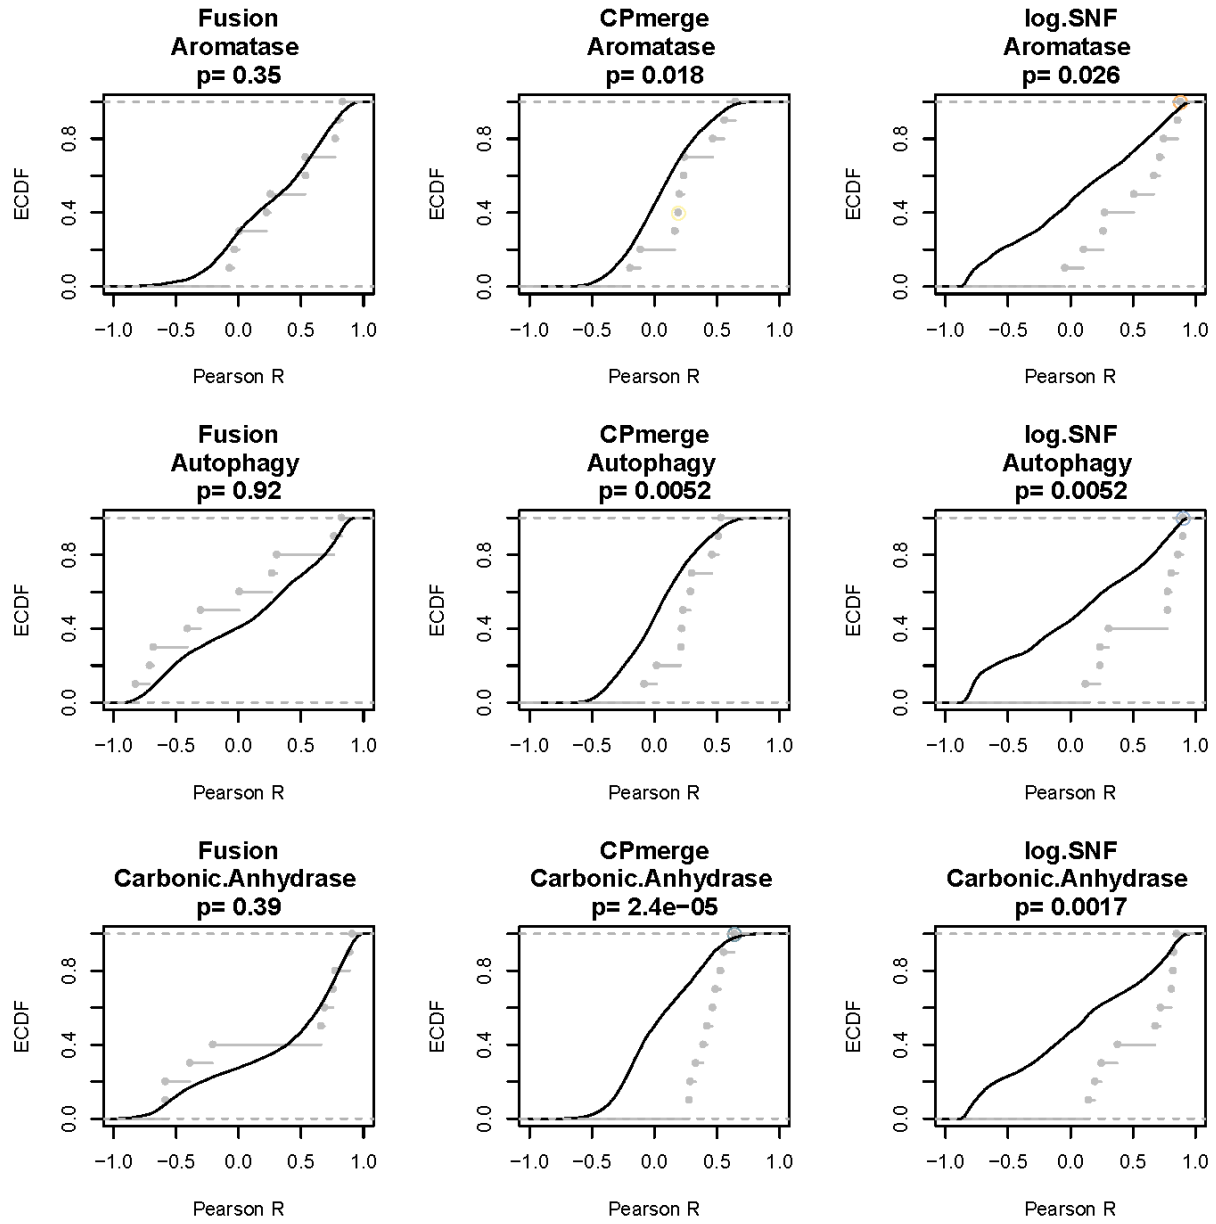

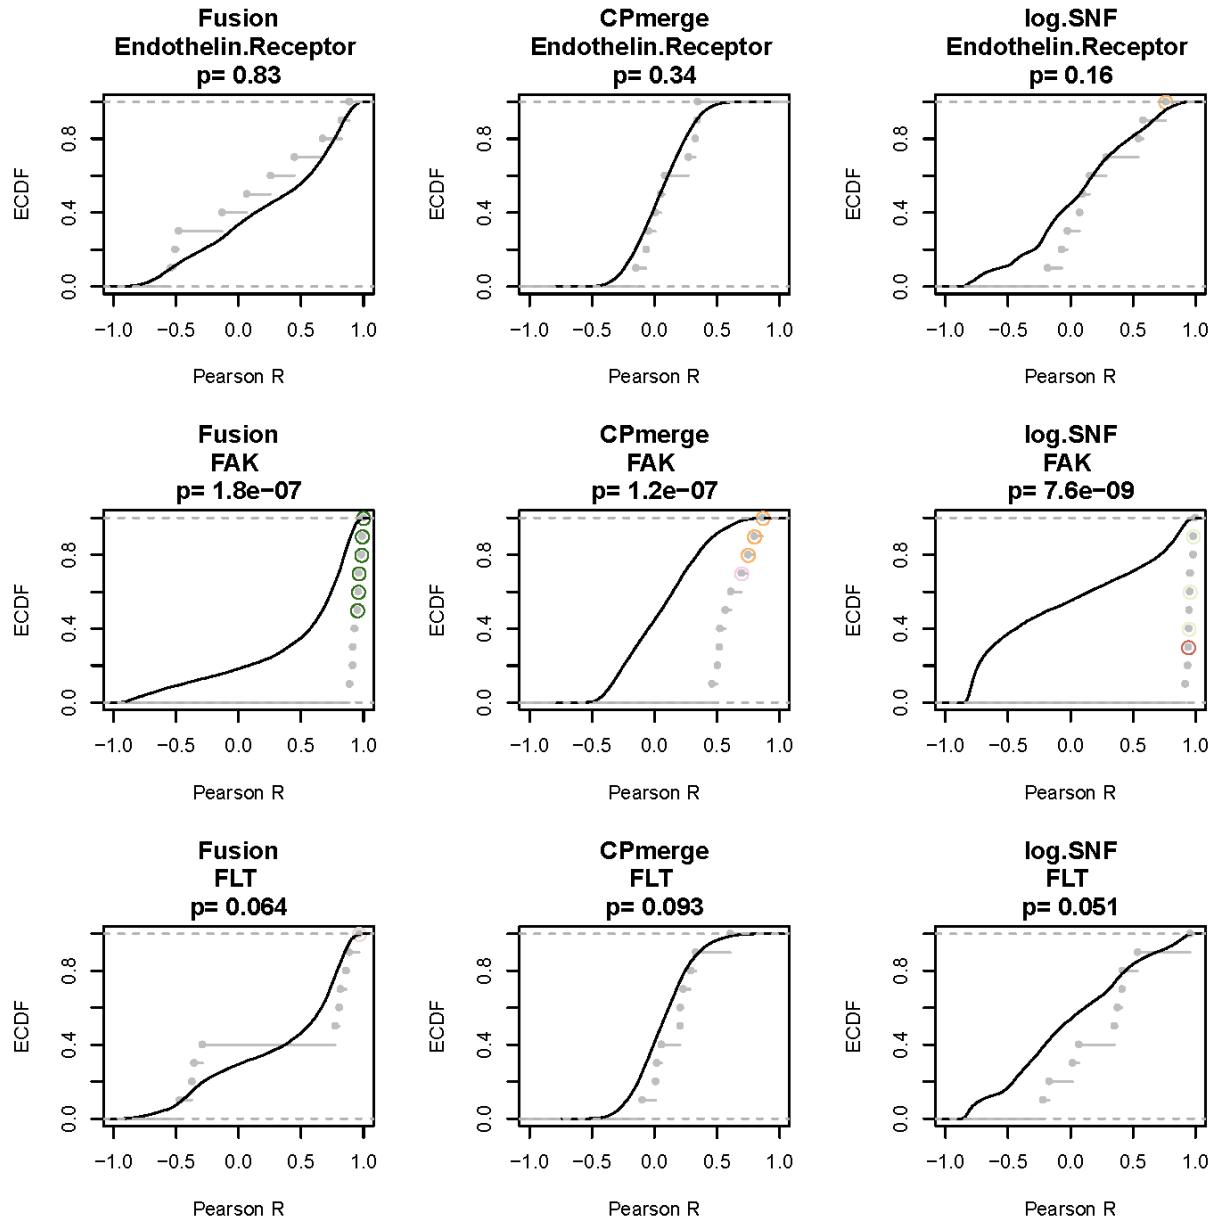

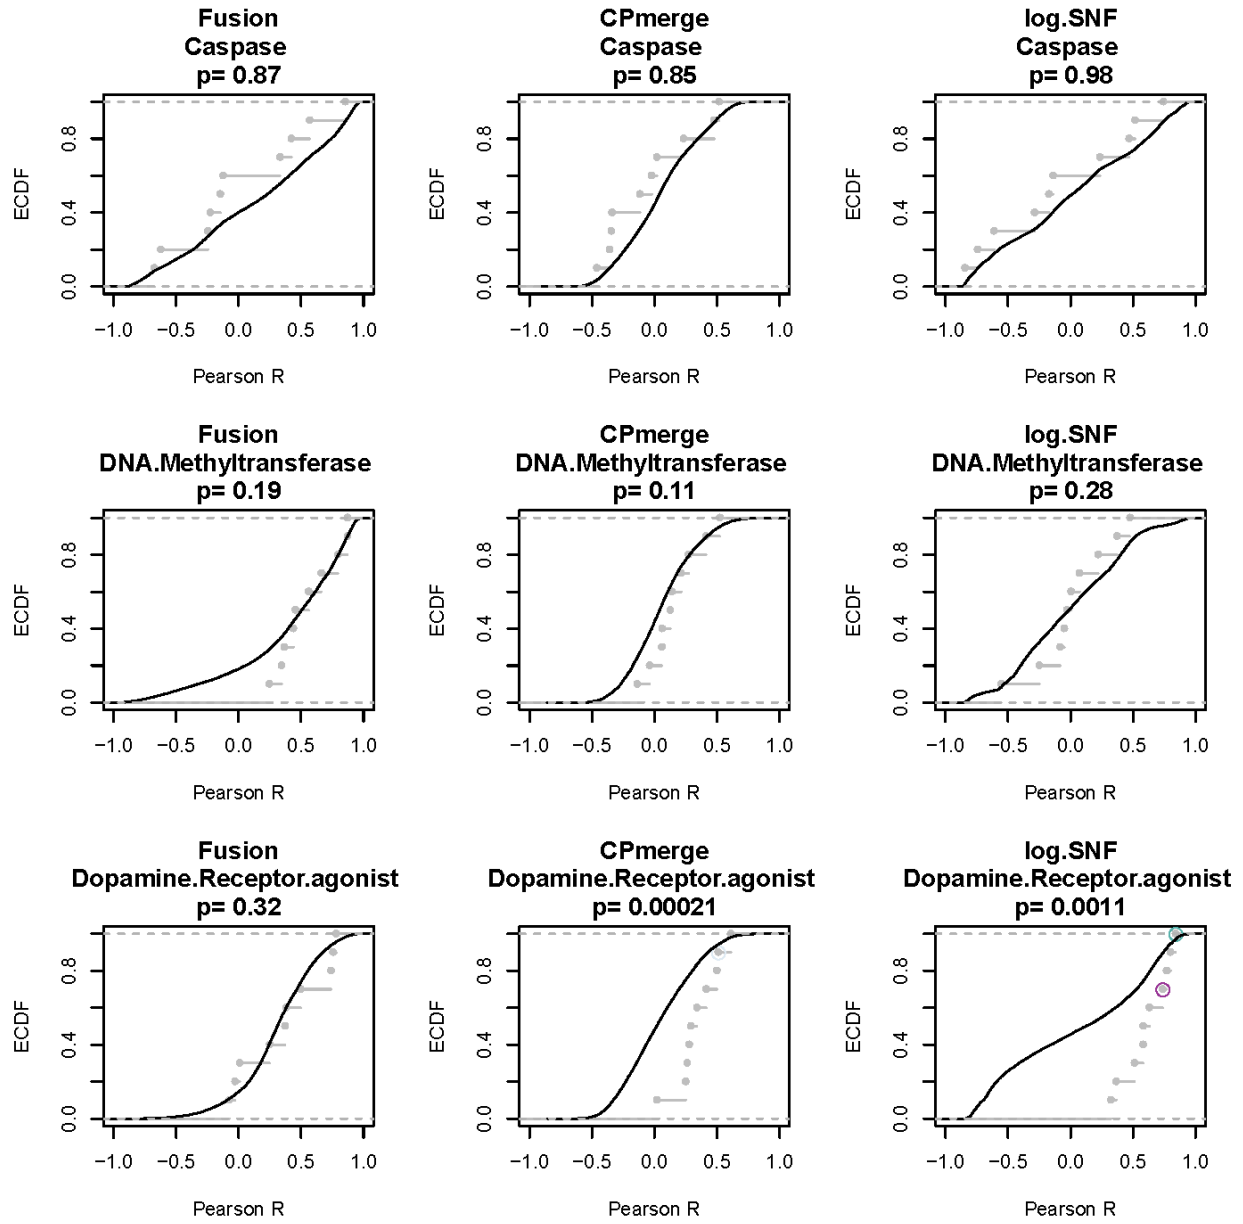

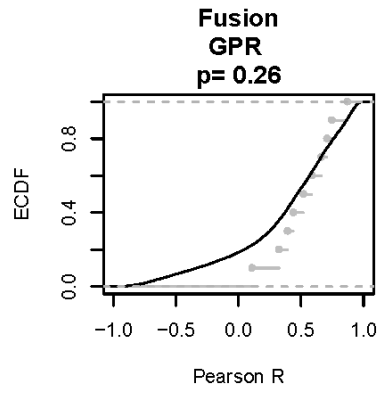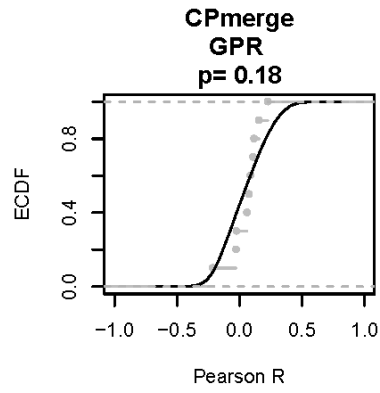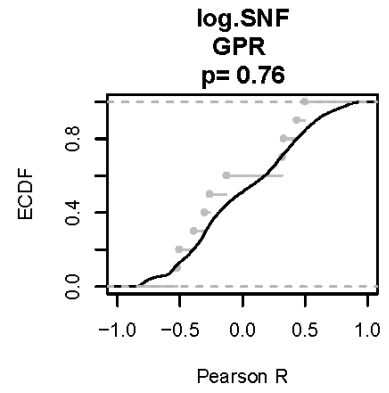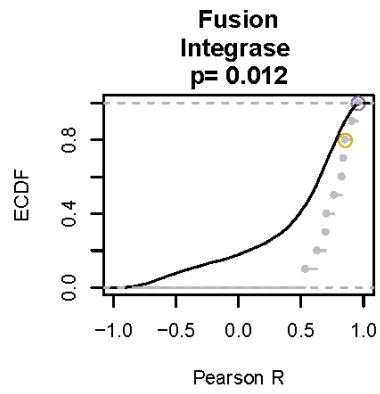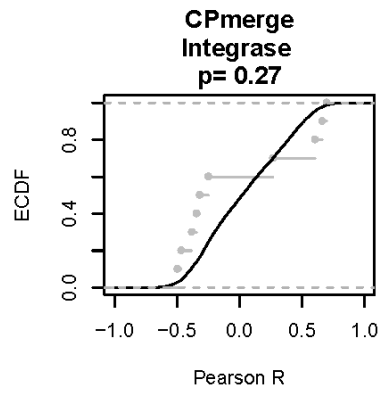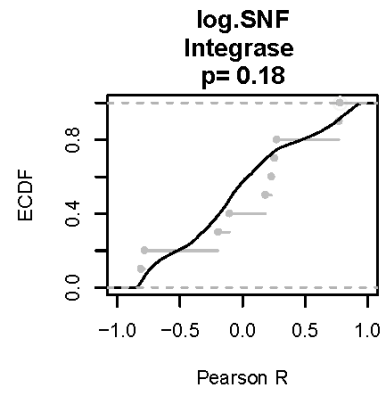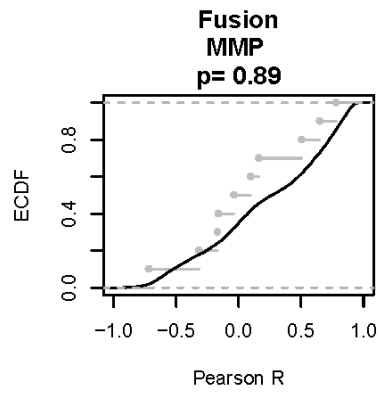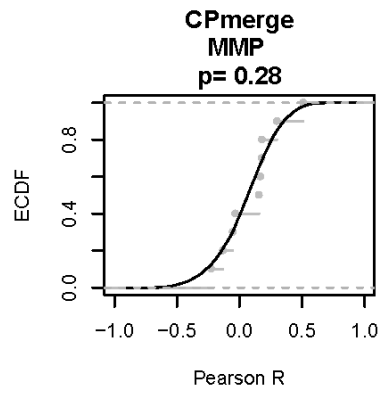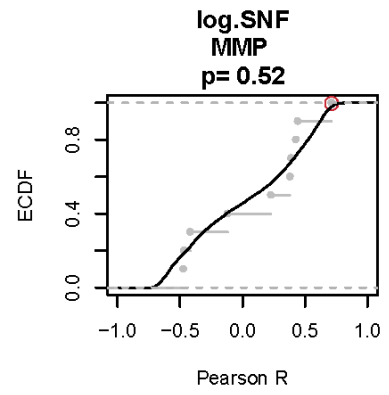

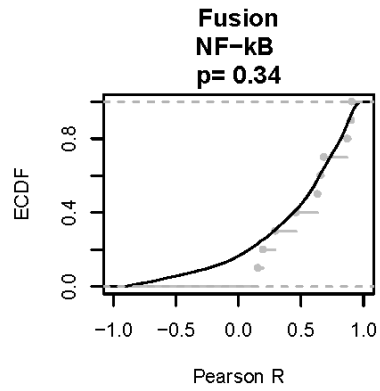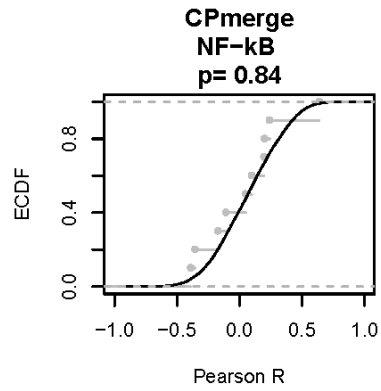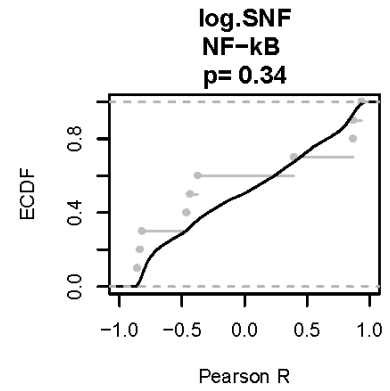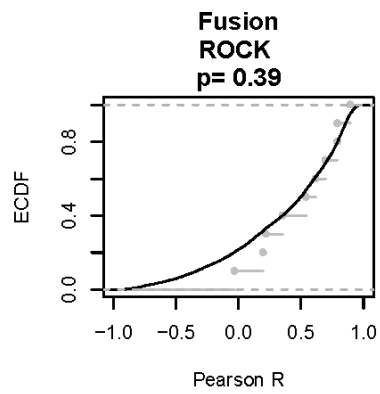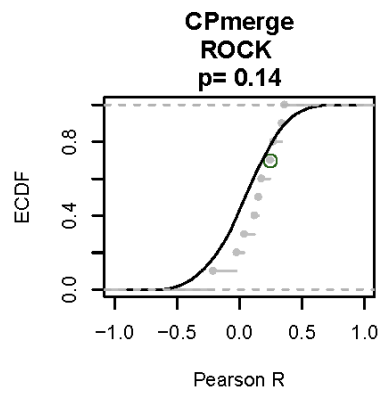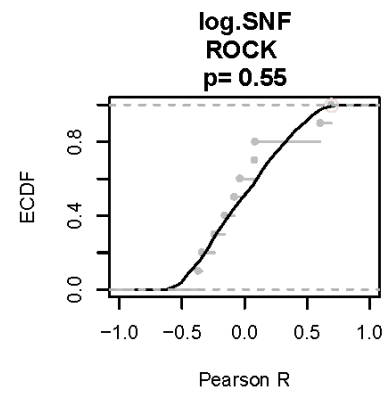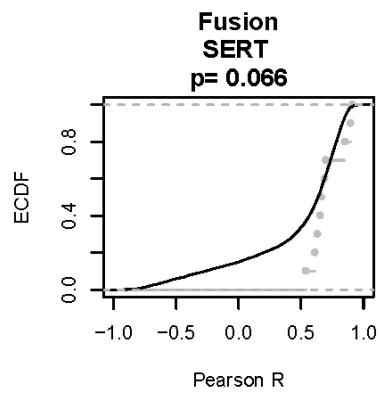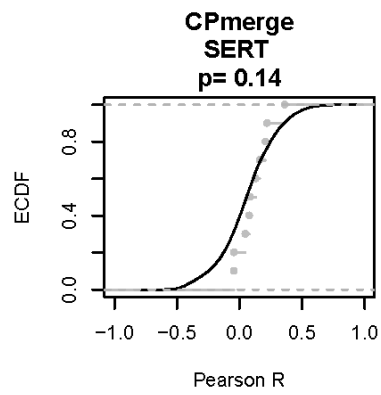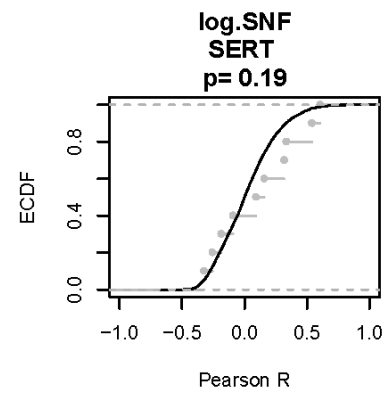

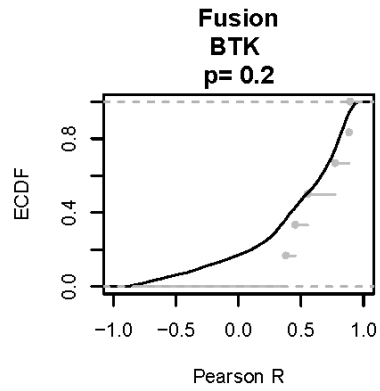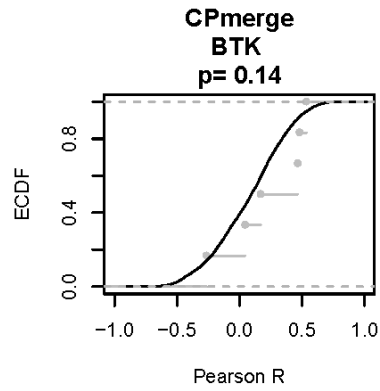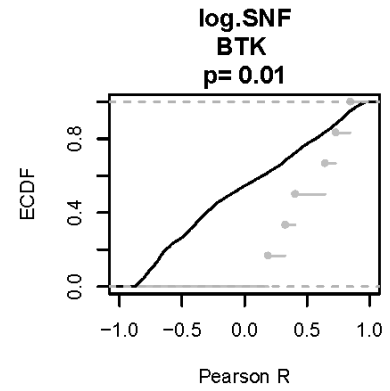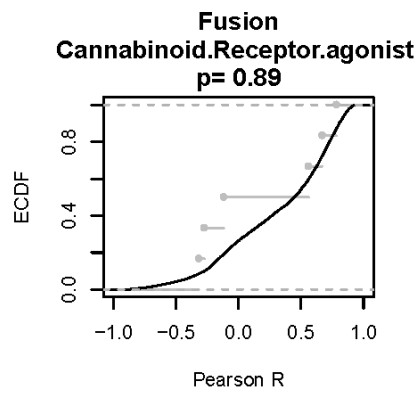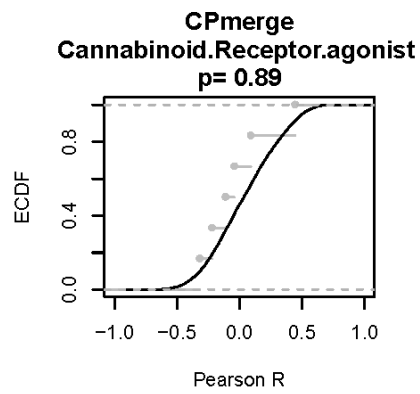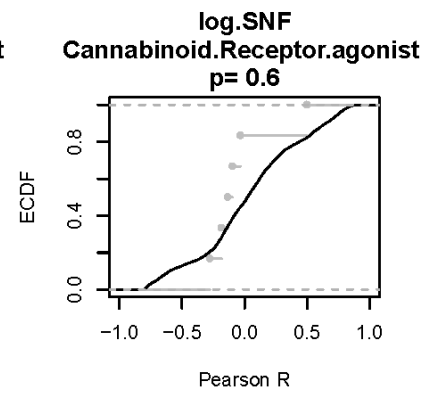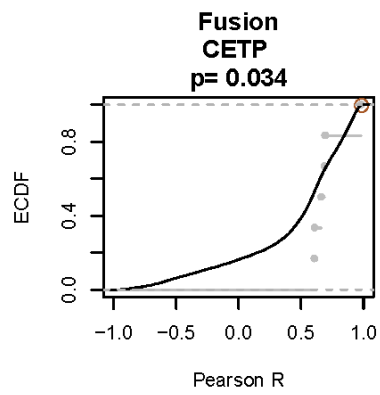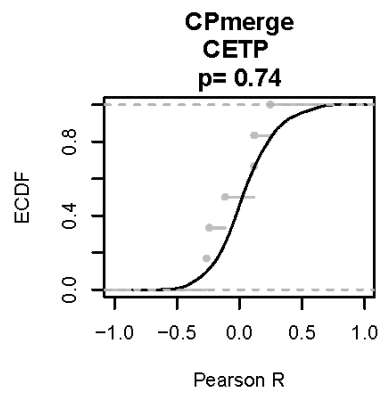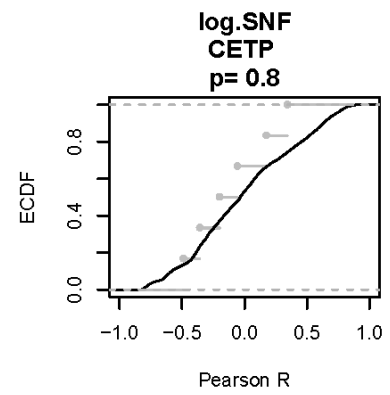

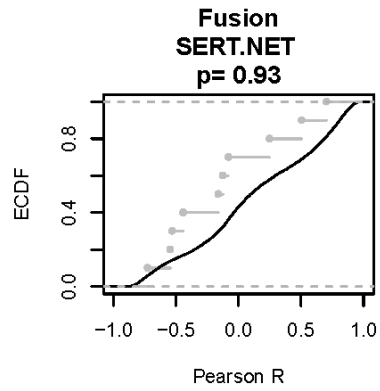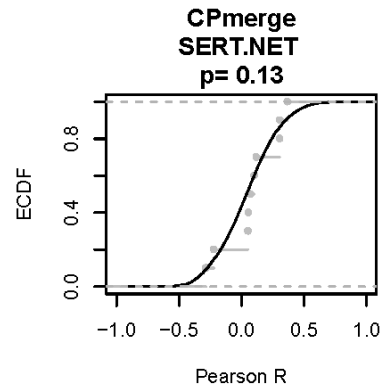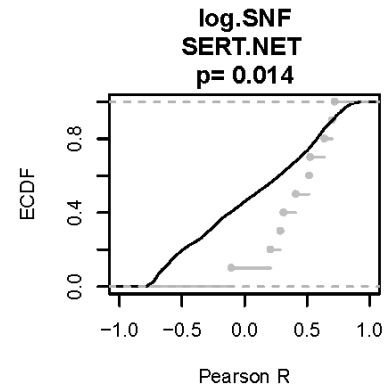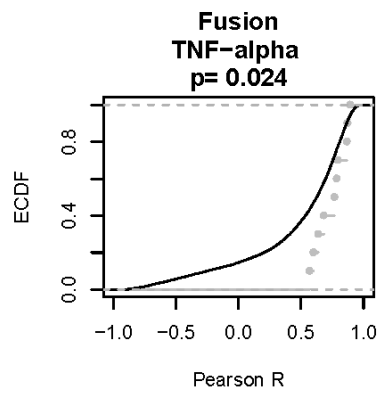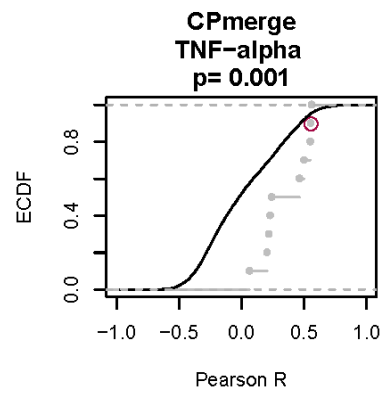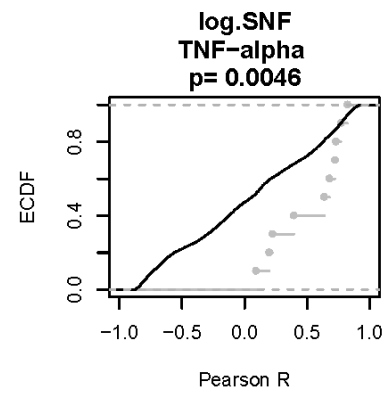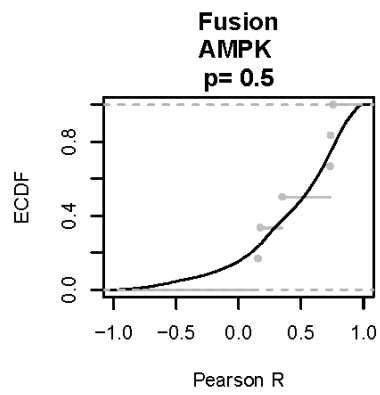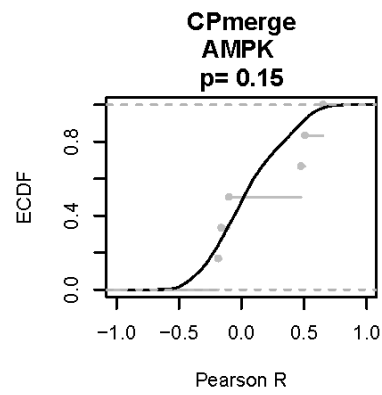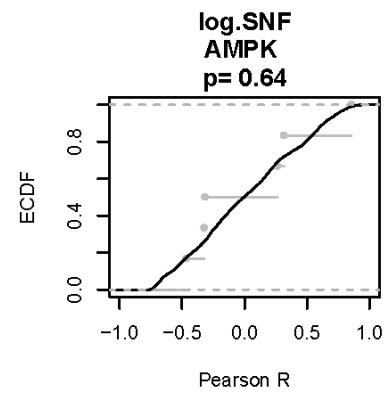



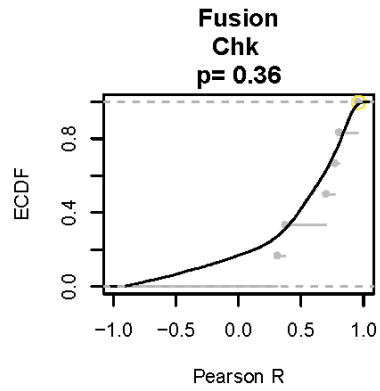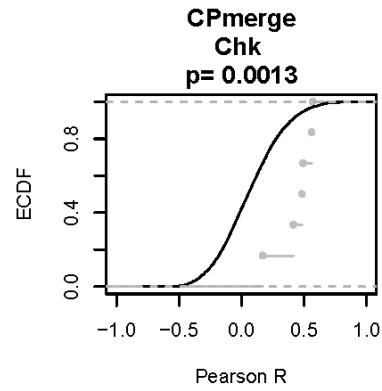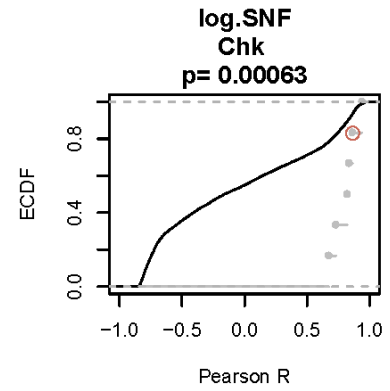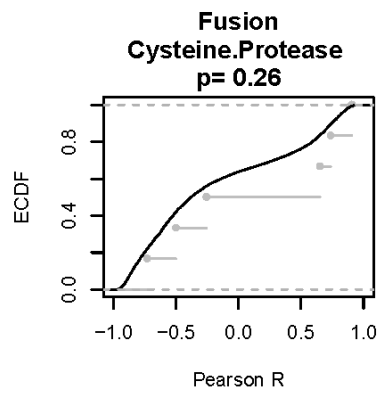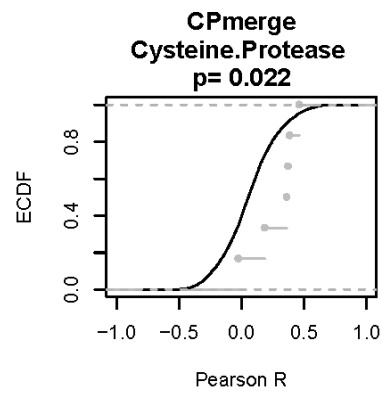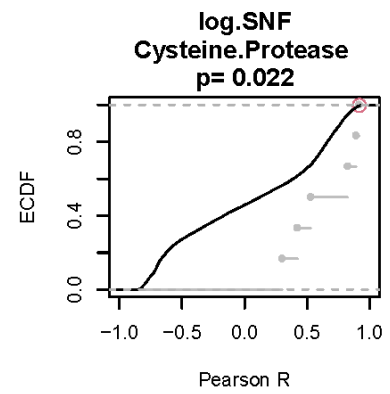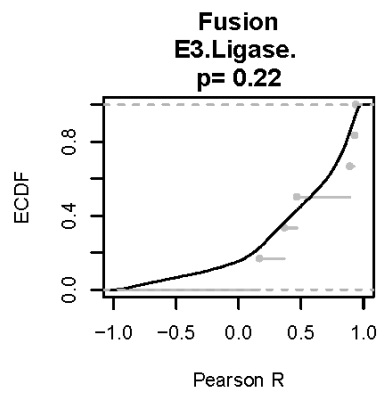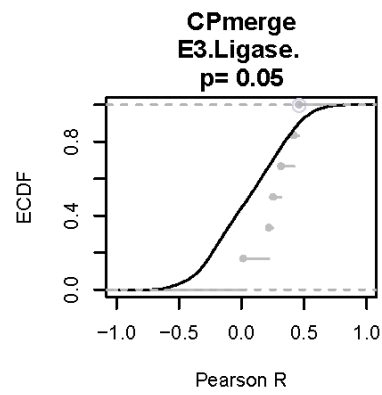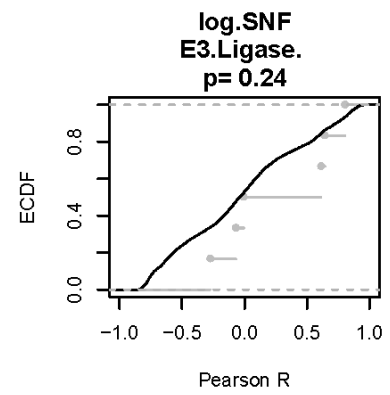

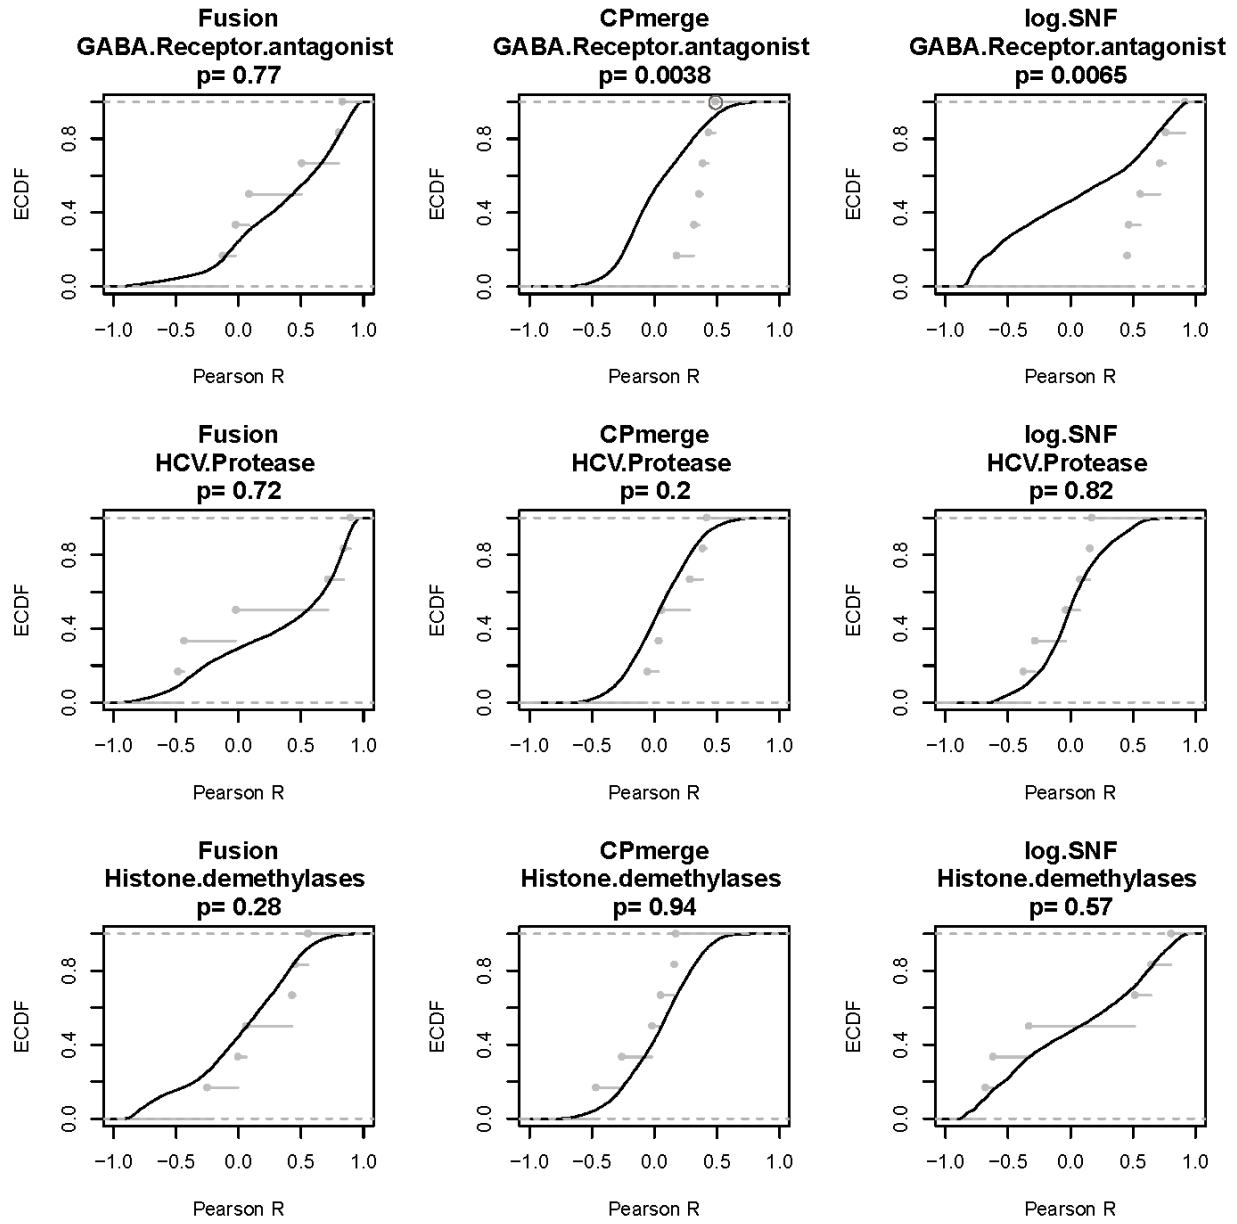

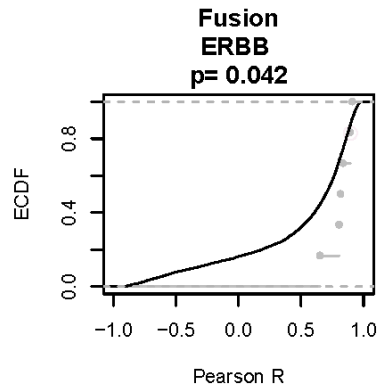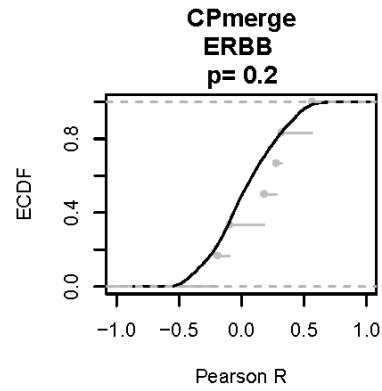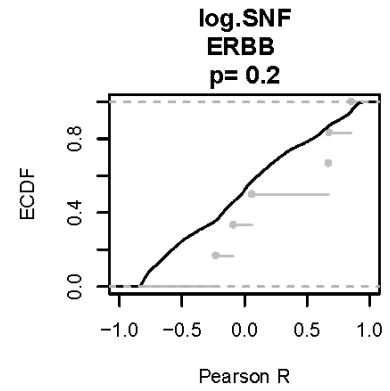

**Fusion  
Estrogen.progestogen.Receptor\_SE  
p= 0.065**

**CPmerge  
Estrogen.progestogen.Receptor\_SE  
p= 0.39**

**log.SNF  
Estrogen.progestogen.Receptor\_SE  
p= 0.012**

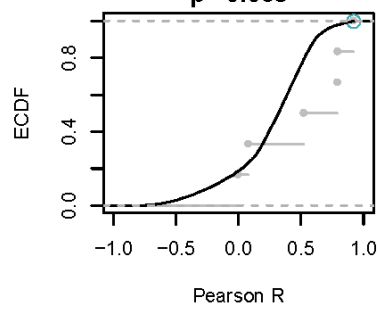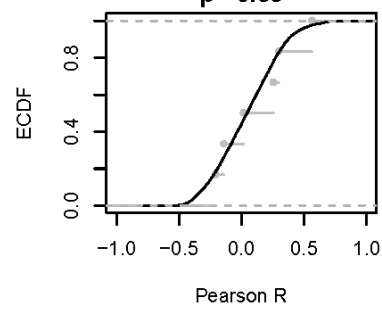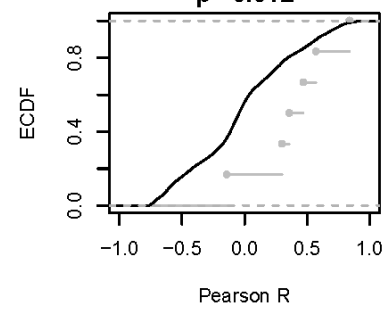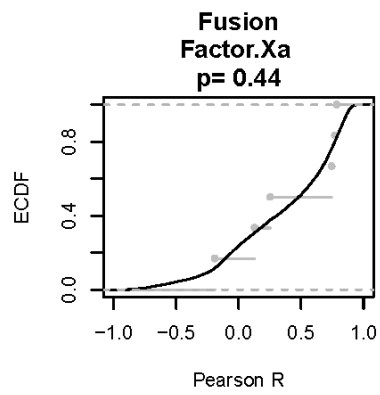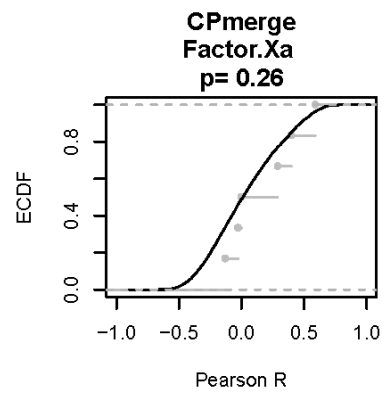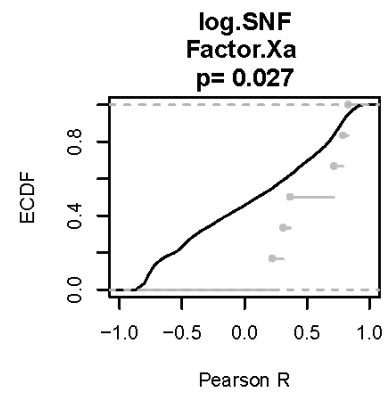

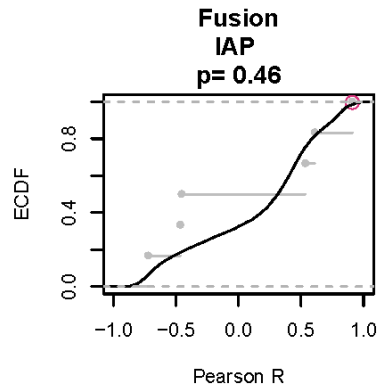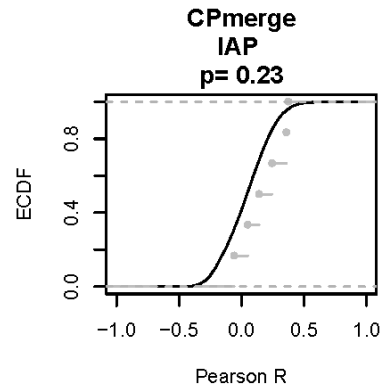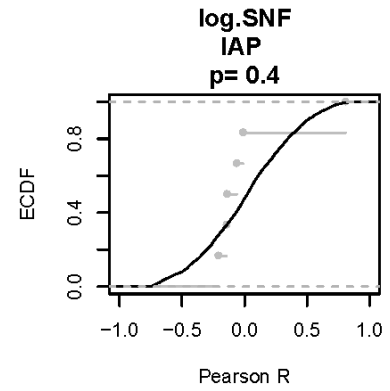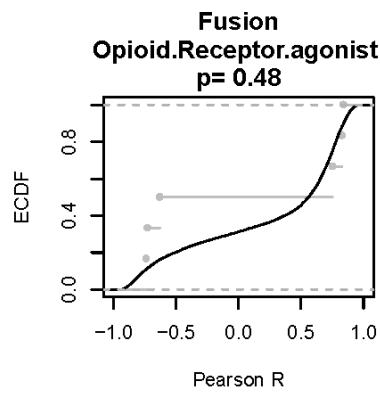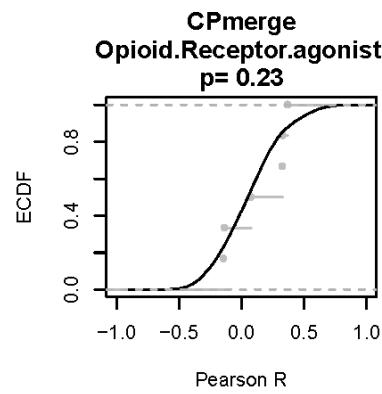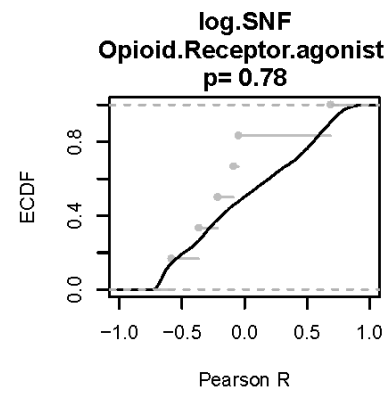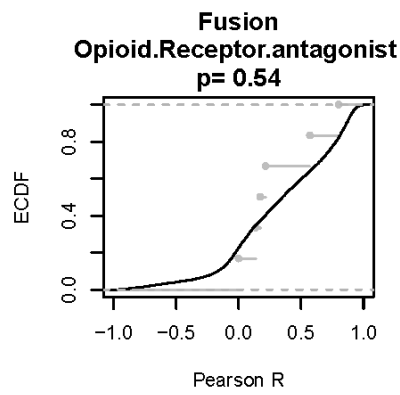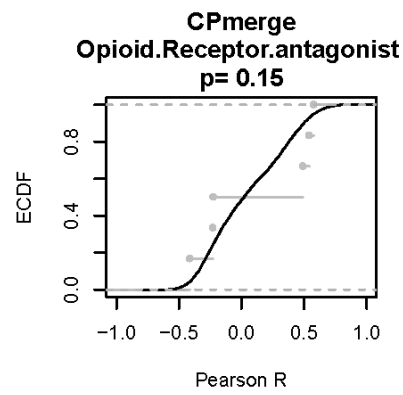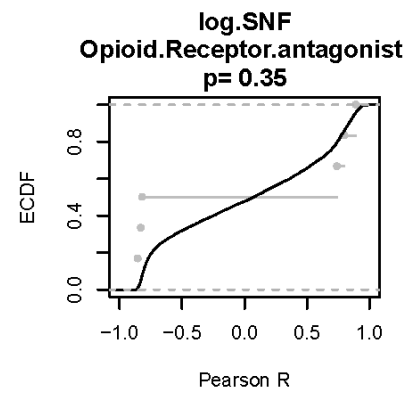

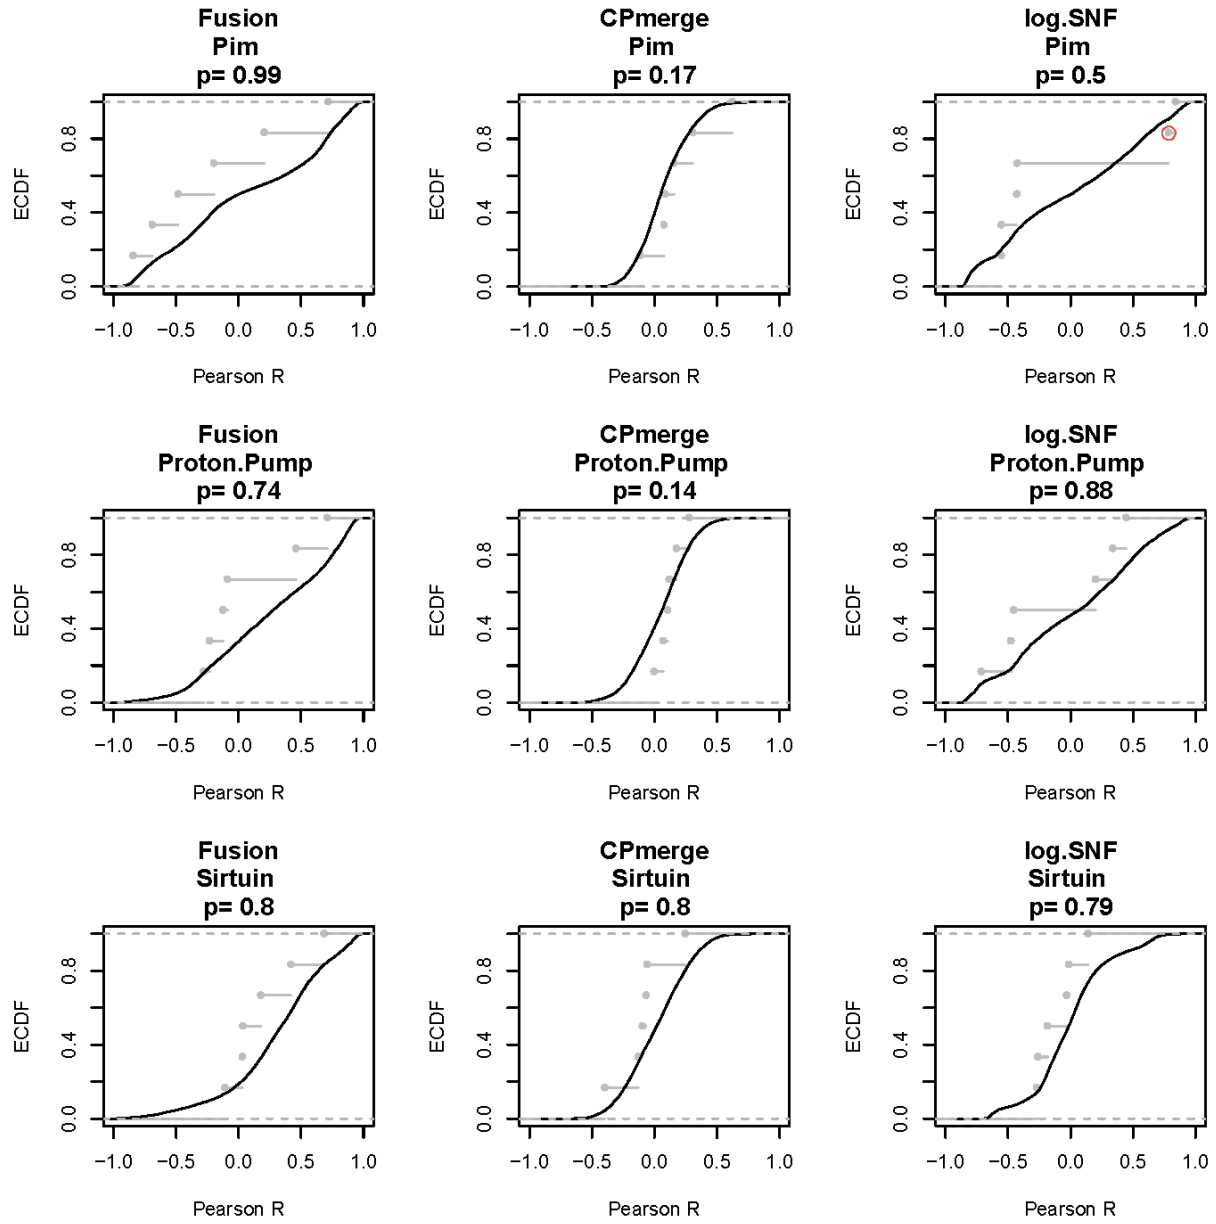

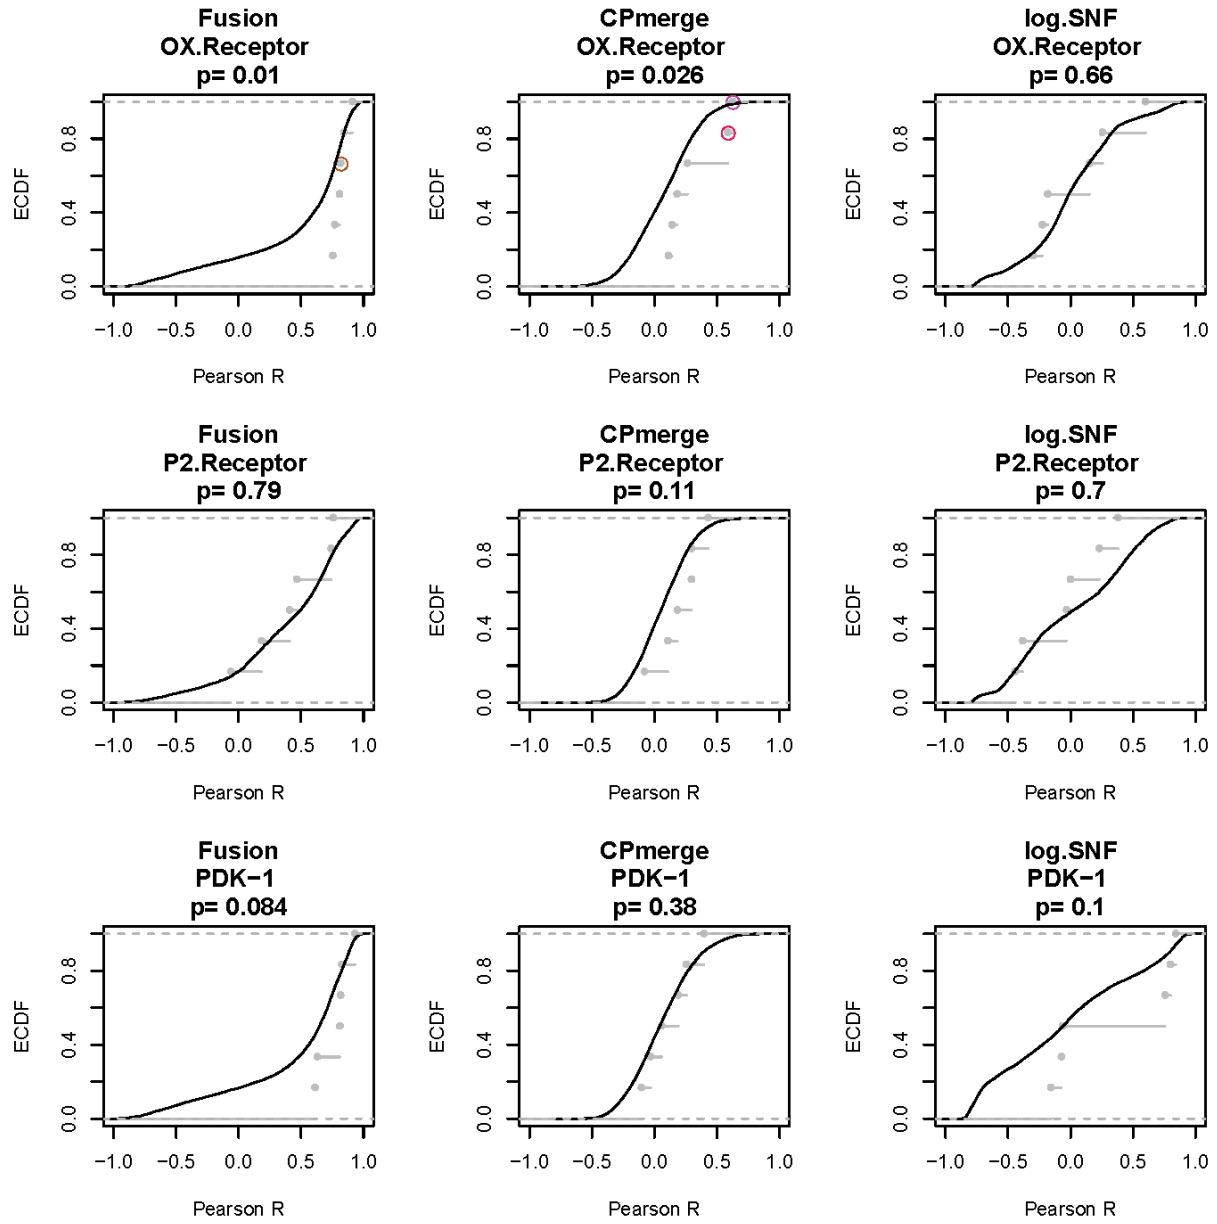

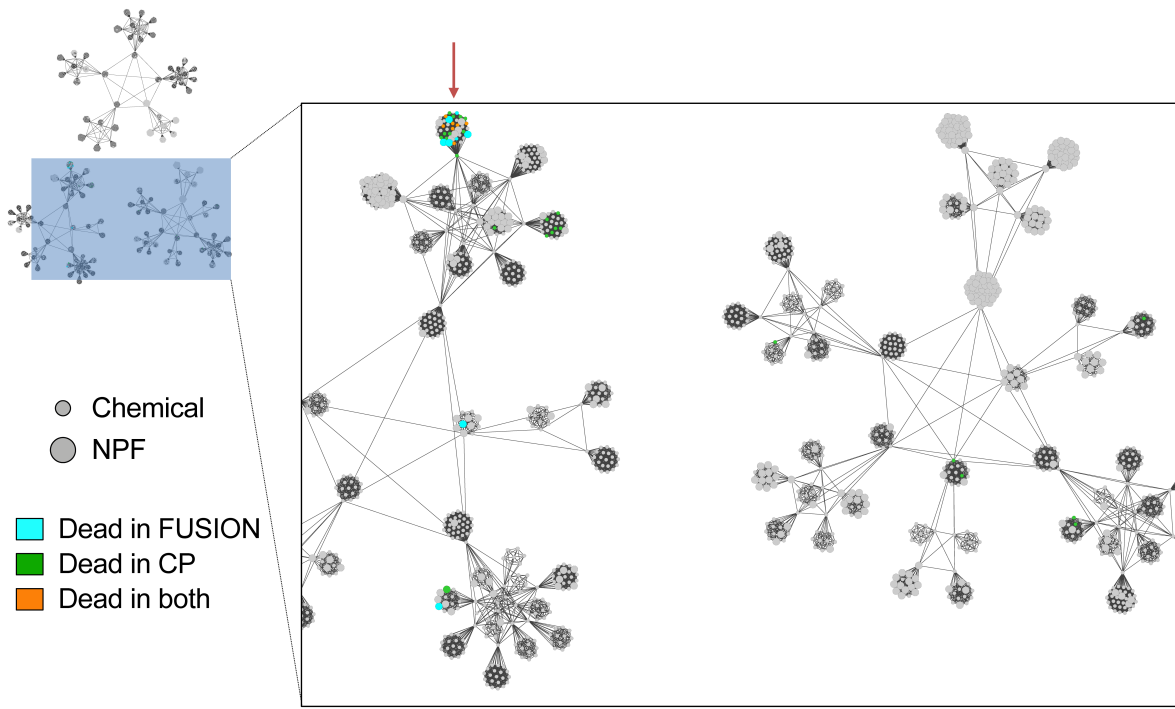

**Supplementary Figure 9: “Dead” Compounds in CP and FUSION cluster together in the SNF-Euclidean APC map.** Red arrow indicates a cluster enriched with compounds that were flagged as dead in either or both datasets.

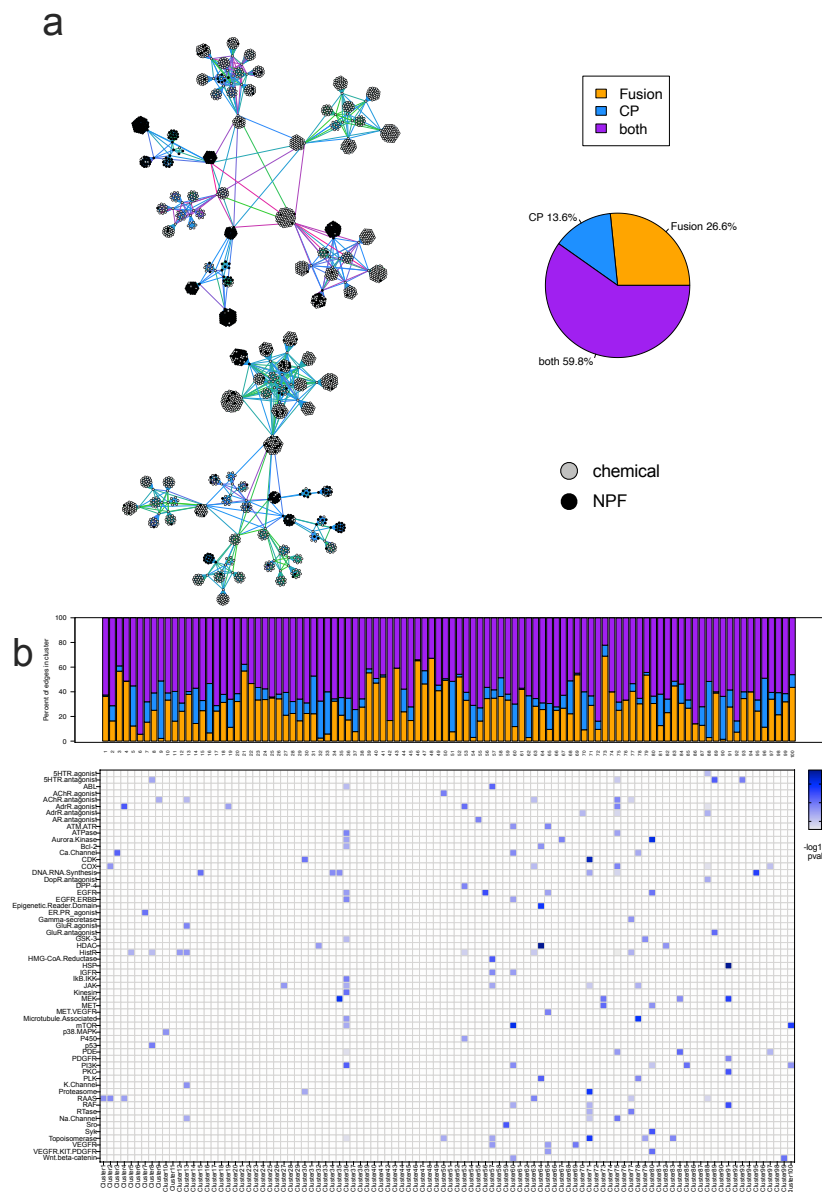

**Supplementary Figure 10. Affinity propagation clustering map of the SNF-pearson network.** A) Hierarchical affinity propagation clustering map of the SNF network using Pearson correlation as the similarity metric. Edges are colored based on contribution from individual datasets: Orange, supported by FUSION; blue, supported by CP; purple, supported by both datasets. Perturbagen type is indicated by node color: black, NPF; gray, pure chemical. B) Bar plot showing the percent of total edges in each APC cluster that are supported by FUSION, CP, or both datasets. Clusters are labeled by cluster number. C) Heatmap showing minus log<sub>10</sub> p-values calculated by hypergeometric test for each target annotation class, per APC cluster. Target classes without significant enrichment in any cluster are omitted (Bonferroni-corrected alpha = 0.0016).



a

Sliders to control visibility of features based on number of samples they appear in

Sliders for Min. Activity in individual Biological assays

Toggle between distance metrics

Sliders for Minimum Cluster and SNF scores

Search for names and masses (can input multiple separated by a comma)

Axis options:  
 -Retention Time  
 -Precursor MZ  
 -Frequency  
 -FuSiOn Activity Score  
 -FuSiOn Cluster Score  
 -CP Activity Score  
 -CP Cluster Score

### AN INTERACTIVE EXPLORER FOR INTEGRATED NATURAL PRODUCTS MS METABOLOMICS DATA

Interact with the widgets on the left to query a subset of m/z features to plot. Hover over the circles to see more information about each feature. The opacity of the spots is currently set to the SNF Cluster Score (the average of the in group SNF similarity metrics for samples containing the m/z feature).

Inspired by the [Bokeh Movie Explorer](#).

Please cite the code (<http://www.kerjunker.com>)

Activity Score - magnitude of the response phenotype calculated as the square root of the sum of the squares of the perturbations.  
 Cluster Score - the average of the cube of each pairwise similarity score (pearson) for samples in which the m/z features was detected.

For more details see the link to: [Compound Activity Mapping](#)

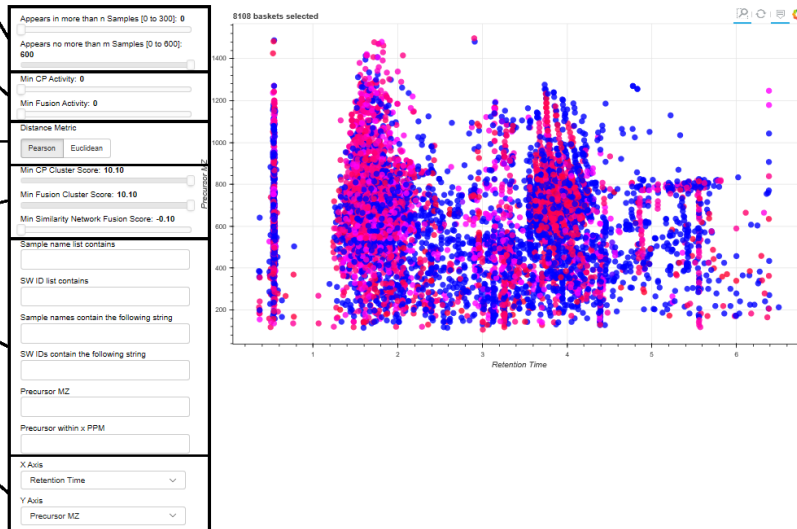

b

Must appear in more than one sample (number of features drops from 8108 to 4610)

### AN INTERACTIVE EXPLORER FOR INTEGRATED NATURAL PRODUCTS MS METABOLOMICS DATA

Interact with the widgets on the left to query a subset of m/z features to plot. Hover over the circles to see more information about each feature. The opacity of the spots is currently set to the SNF Cluster Score (the average of the in group SNF similarity metrics for samples containing the m/z feature).

Inspired by the [Bokeh Movie Explorer](#).

Please cite the code (<http://www.kerjunker.com>)

Activity Score - magnitude of the response phenotype calculated as the square root of the sum of the squares of the perturbations.  
 Cluster Score - the average of the cube of each pairwise similarity score (pearson) for samples in which the m/z features was detected.

For more details see the link to: [Compound Activity Mapping](#)

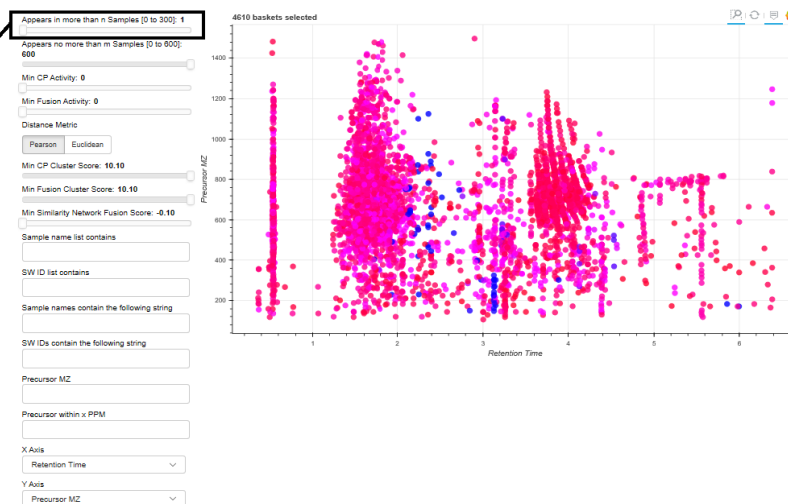

C

### AN INTERACTIVE EXPLORER FOR INTEGRATED NATURAL PRODUCTS MS METABOLOMICS DATA

Interact with the widgets on the left to query a subset of m/z features to plot. Hover over the circles to see more information about each feature. The opacity of the spots is currently set to the SNF Cluster Score (the average of the in group SNF similarity metrics for samples containing the m/z feature).

Inspired by the [Bokeh Movie Explorer](#).

Please cite the code (<http://www.kerjunktur.com>)

Activity Score - magnitude of the response phenotype calculated as the square root of the sum of the squares of the perturbations.  
Cluster Score - the average of the cube of each pairwise similarity score (pearson) for samples in which the m/z features was detected.

For more details see the link to: [Compound Activity Mapping](#)

Minimum CP activity score of 2 (3981 features to 1162 features)

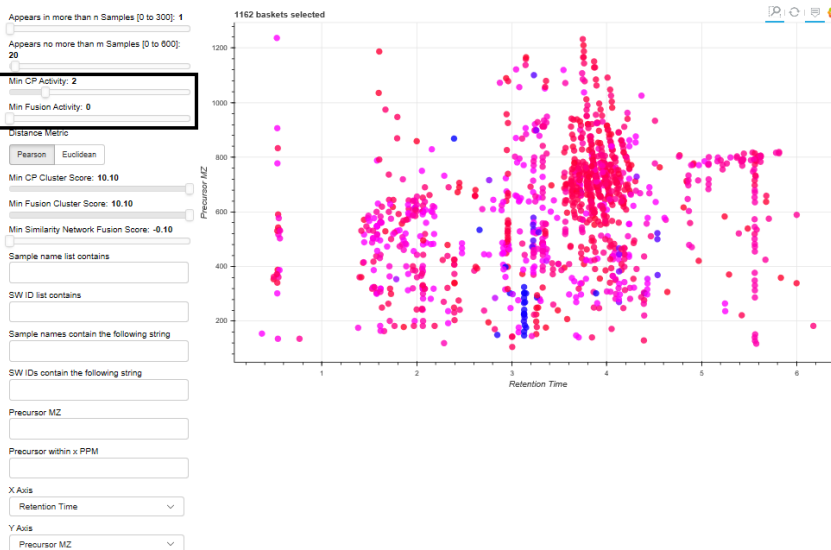

### AN INTERACTIVE EXPLORER FOR INTEGRATED NATURAL PRODUCTS MS METABOLOMICS DATA

Interact with the widgets on the left to query a subset of m/z features to plot. Hover over the circles to see more information about each feature. The opacity of the spots is currently set to the SNF Cluster Score (the average of the in group SNF similarity metrics for samples containing the m/z feature).

Inspired by the [Bokeh Movie Explorer](#).

Please cite the code (<http://www.kerjunktur.com>)

Activity Score - magnitude of the response phenotype calculated as the square root of the sum of the squares of the perturbations.  
Cluster Score - the average of the cube of each pairwise similarity score (pearson) for samples in which the m/z features was detected.

For more details see the link to: [Compound Activity Mapping](#)

Minimum FUSION Activity of 2 (3981 features to 478 features)

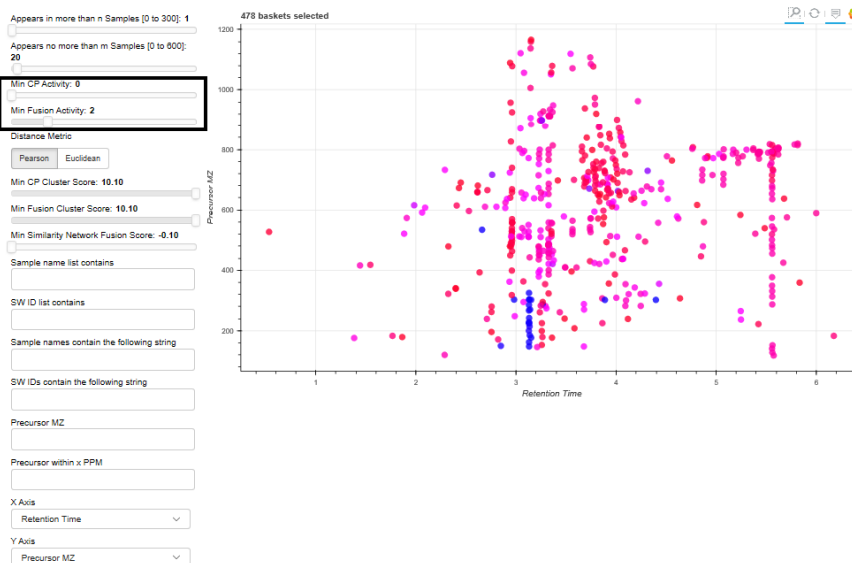

d

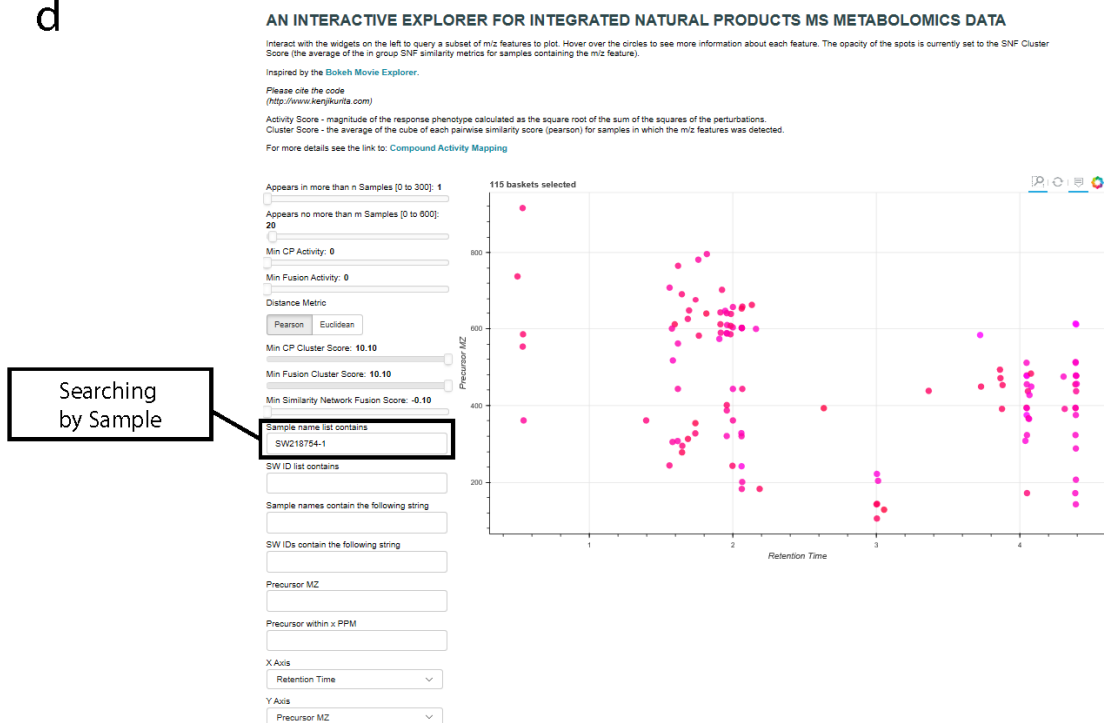

**Supplementary Figure 11: Bokeh Server demonstration of functionality. (a)**

Labeled webpage for the bokeh server showing functionality and controllable components. (b) Minimum Occurrence set to 2 reduces the number of singleton ms features to ~4000. (c) Depiction of setting activity minimums in both CP and FUSION. (d) Searching bokeh server by sample (SW218754-1) to display all features in that fraction. General search features: Multiple codes may be searched at the same time using “, (space)” to show features in common among all searched codes. Using the text boxes and sliders on the left side of the plot, the feature list can be filtered to include only candidate features of interest. For example, increasing the Minimum Similarity Network Fusion Score slider removes features with low SNF Scores that are poorly correlated with any specific phenotype. Inserting a list of sample names into the 'Sample list name contains' text box filters the results to show only features present in a specific cluster of interest. Features are color-coded by SNF Score, from blue (strongly active) to red (weakly active). In addition, hovering the mouse over each feature in the plot reveals a pop-up window containing information about the feature including mass spectrometric data ( $m/z$ ,  $rt$ ,  $CCS$ ) and distribution across the sample set.

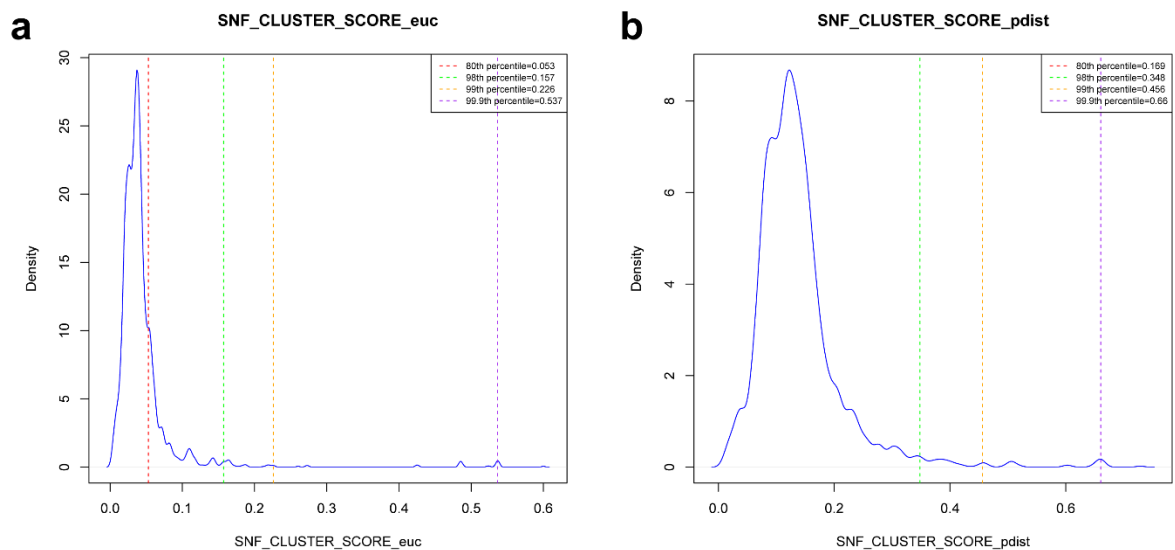

**Supplementary Figure 12. Density distributions of SNF scores for unique metabolites in the natural product fraction library.** SNF scores are shown as density plots using (a) Euclidean distance and (b) Pearson Correlation as the similarity metric. Percentiles are indicated by dotted lines as labeled.

a

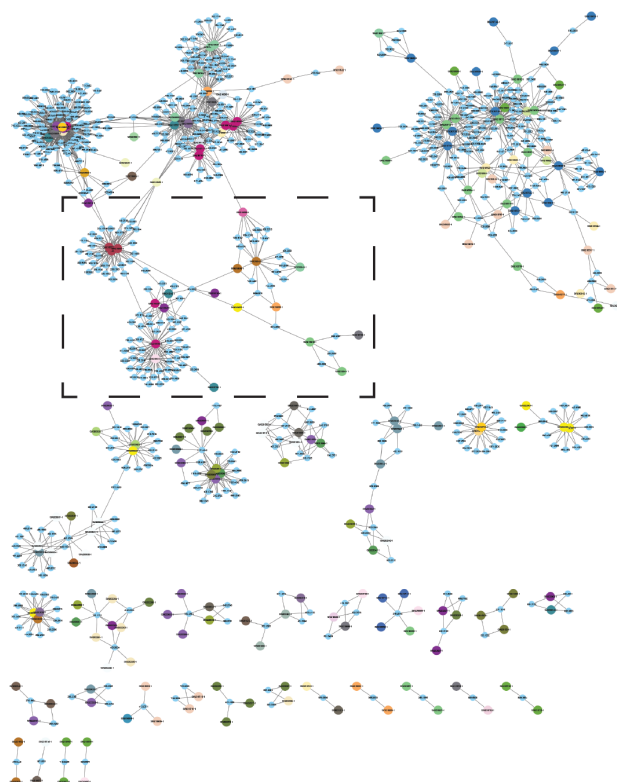

b

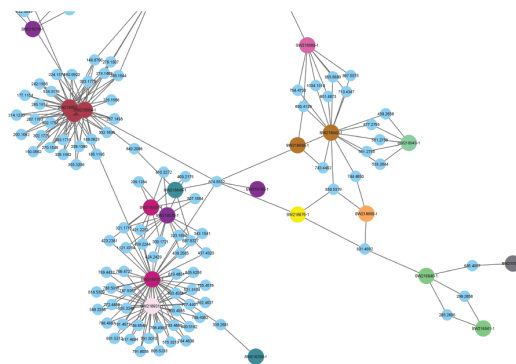

**Supplementary Figure 13: Compound Activity map for combined SNF profiles and untargeted metabolomics features.**

Large nodes represent extracts. Small nodes represent mass spectrometry features. Edges represent presence of mass spectrometric features in connected extracts. Only mass spectrometric features with predicted SNF scores  $>0.06$  are included. A) Full Compound Activity Map. Large nodes color coded by AOC assignment class. B) Expansion of a representative region of the APC map with large nodes coloured by APC cluster.



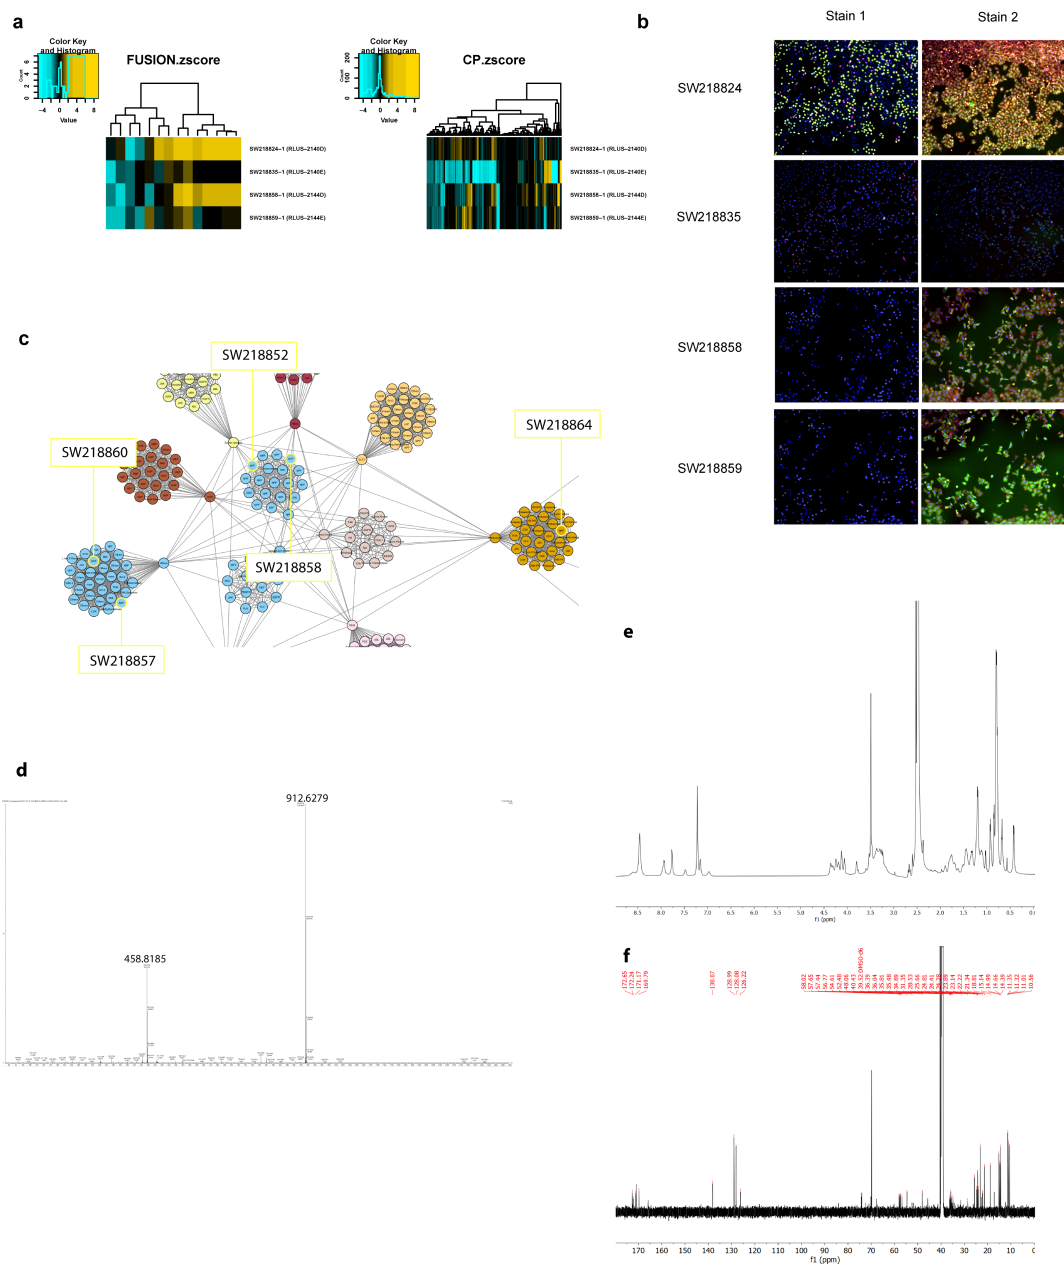

**Supplementary Figure 15. Signatures from natural product fractions containing surugamide.** (a) Heatmaps of FUSION z-scores and CP fingerprints, and (b) CP images from natural products containing surugamides. (c) SNF-Euclidean APC cluster showing proximity of surugamide-containing natural product fractions. Nodes are labeled by either target class or perturbagen type. Clusters are shown as colored if they are significantly enriched for particular target class, otherwise are colored light blue. (d) HRMS spectrum of surugamide A. (e)  $^1\text{H}$  NMR spectrum and (f)  $^{13}\text{C}$  NMR spectrum for surugamide A in DMSO- $d_6$  at 600 MHz.





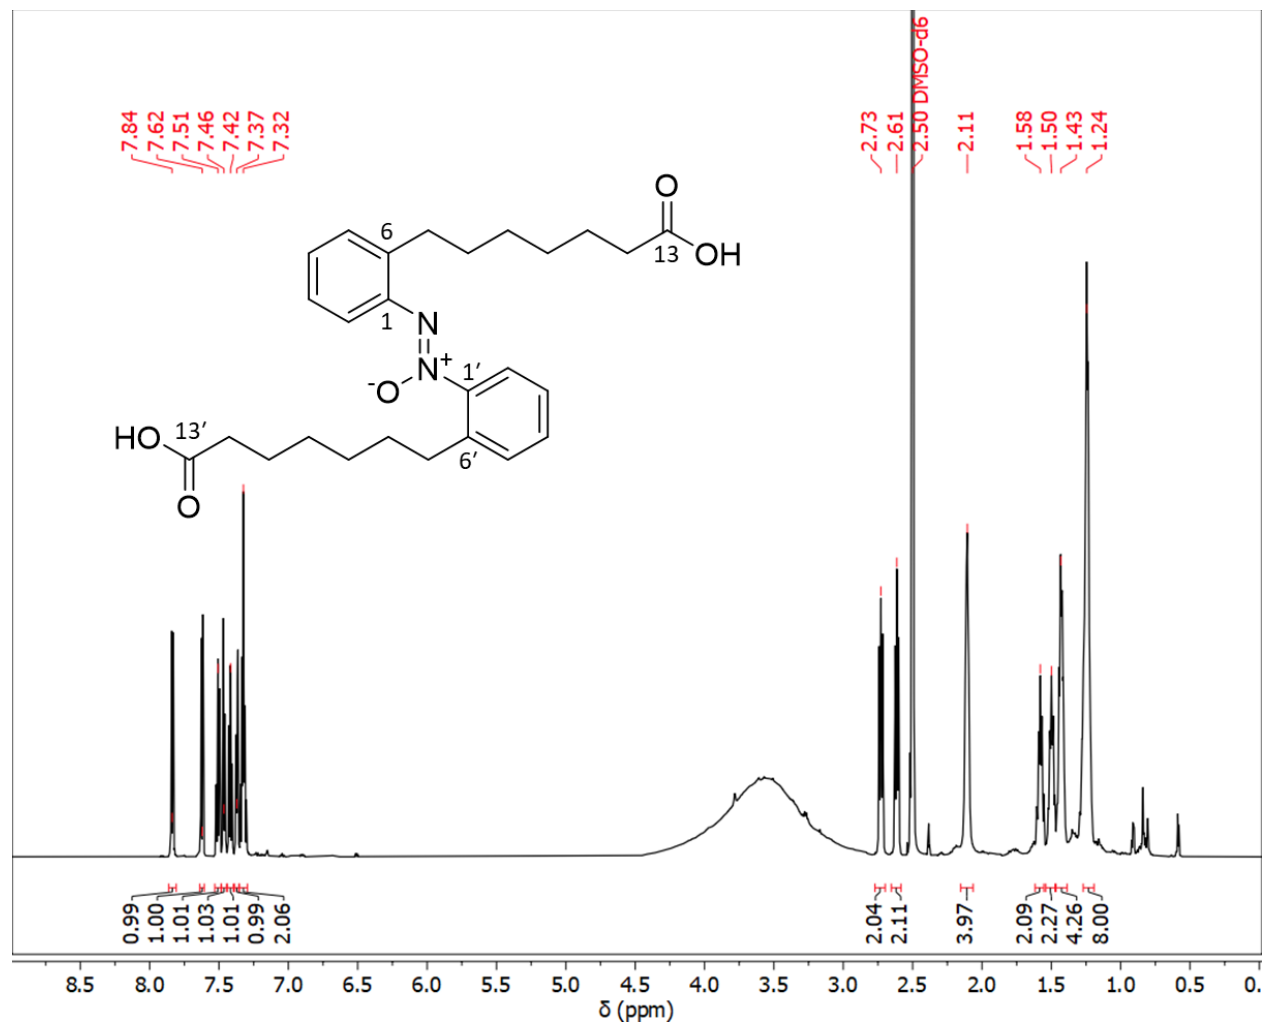

**Supplementary Figure 17. <sup>1</sup>H NMR of parkamycin A.**

<sup>1</sup>H NMR spectrum collected at 600 MHz in DMSO-d<sub>6</sub>

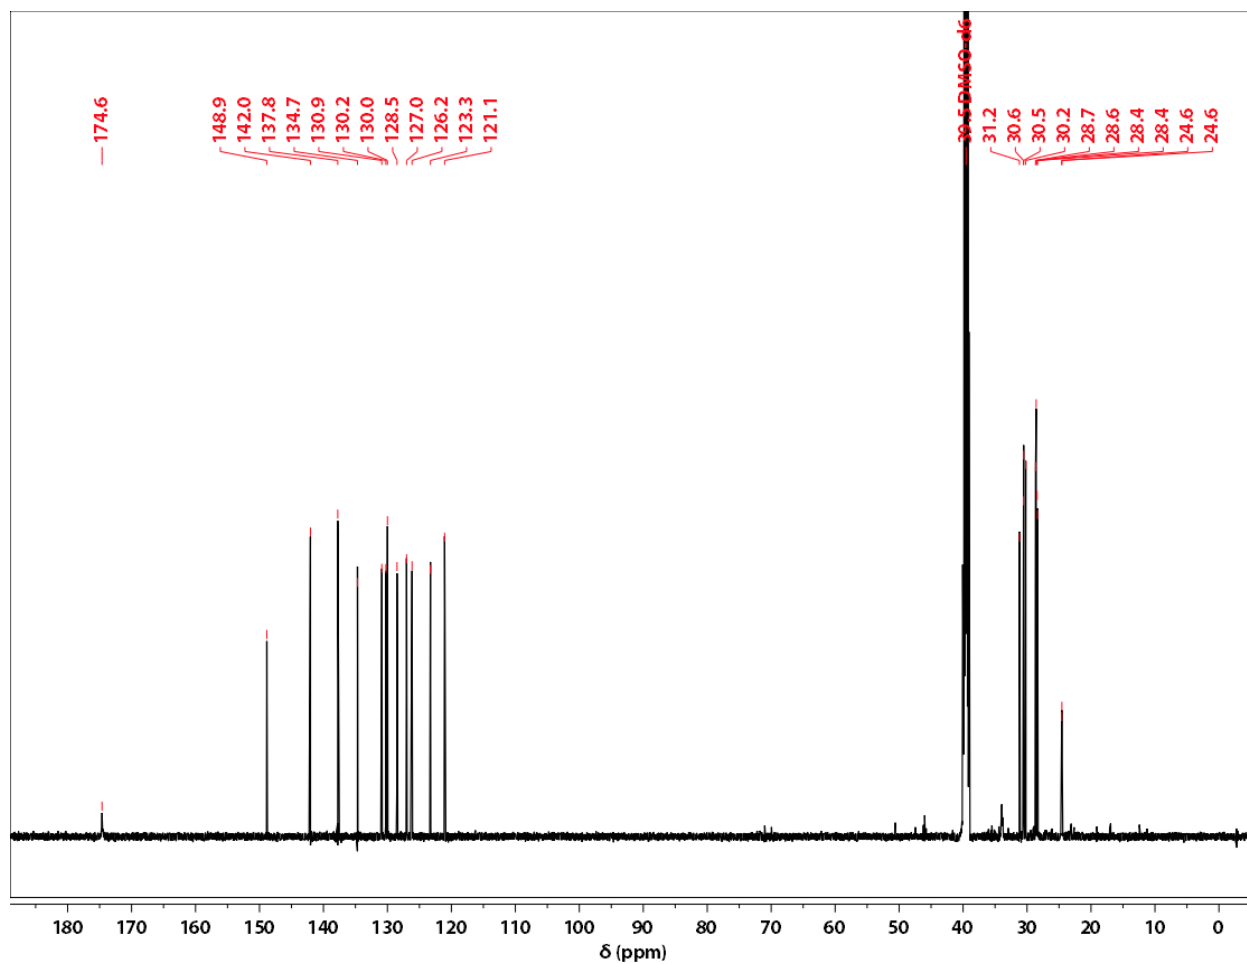

**Supplementary Figure 18.**  $^{13}\text{C}$  NMR of parkamycin A.

$^{13}\text{C}$  NMR spectrum collected at 150 MHz in DMSO- $d_6$

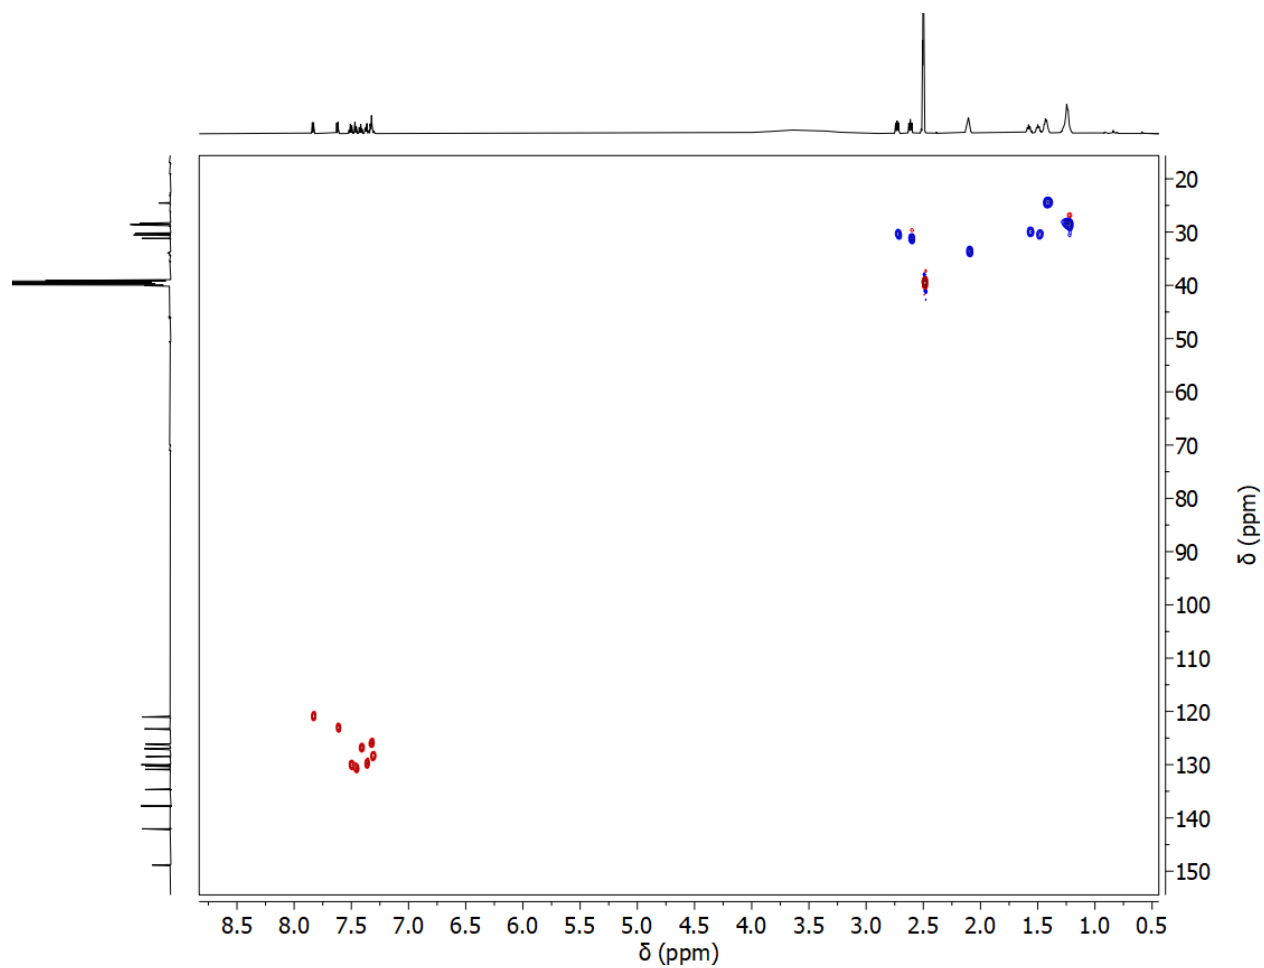

**Supplementary Figure 19. HSQC NMR spectrum of parkamycin A.**

HSQC NMR spectrum collected at 600 MHz in DMSO-d<sub>6</sub>

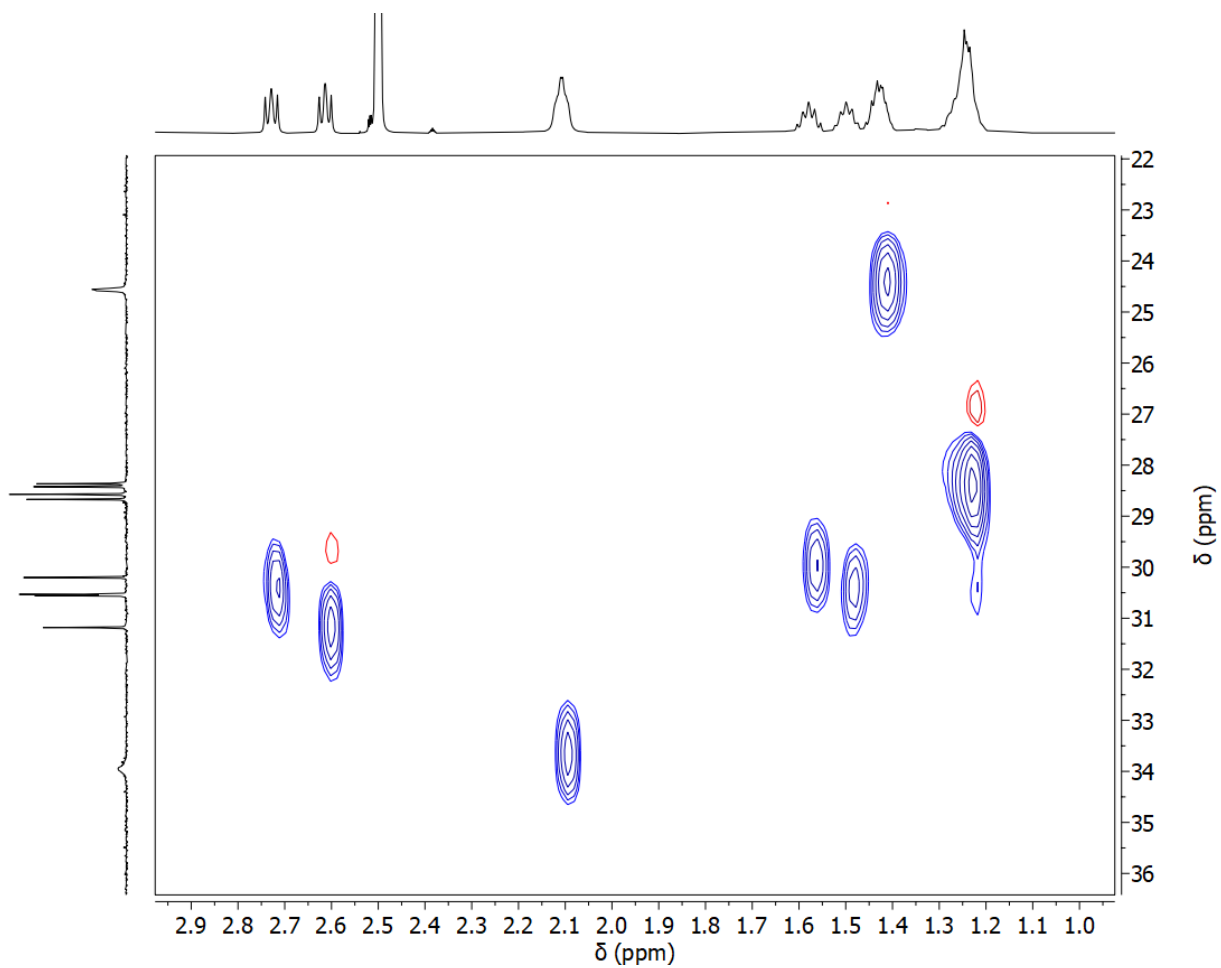

**Supplementary Figure 20. Expanded HSQC NMR spectrum of parkamycin A, region 1.**

Expanded HSQC NMR spectrum collected at 600 MHz in DMSO-*d*<sub>6</sub>

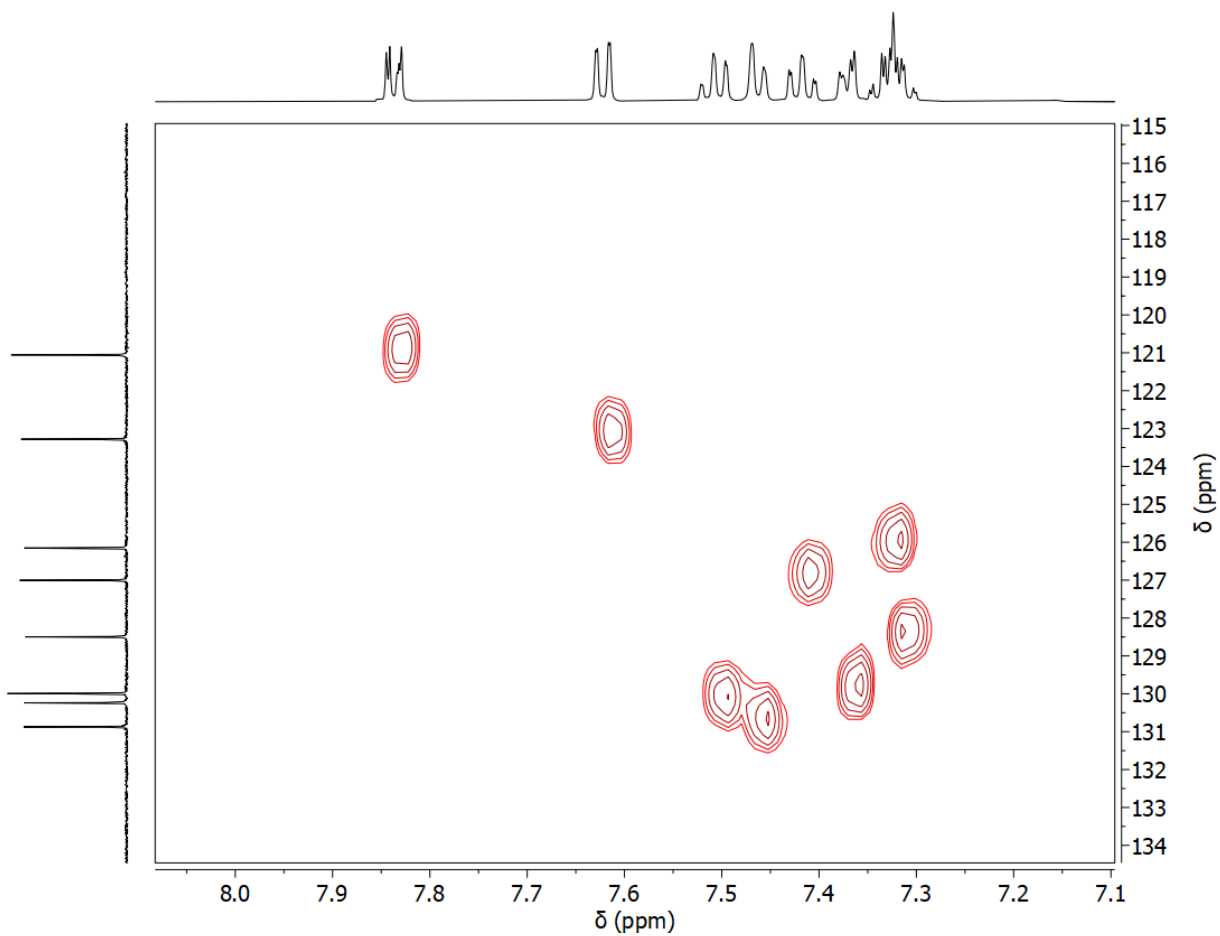

**Supplementary Figure 21. Expanded HSQC NMR spectrum of parkamycin A, region 2.**

Expanded HSQC NMR spectrum collected at 600 MHz in DMSO-*d*<sub>6</sub>

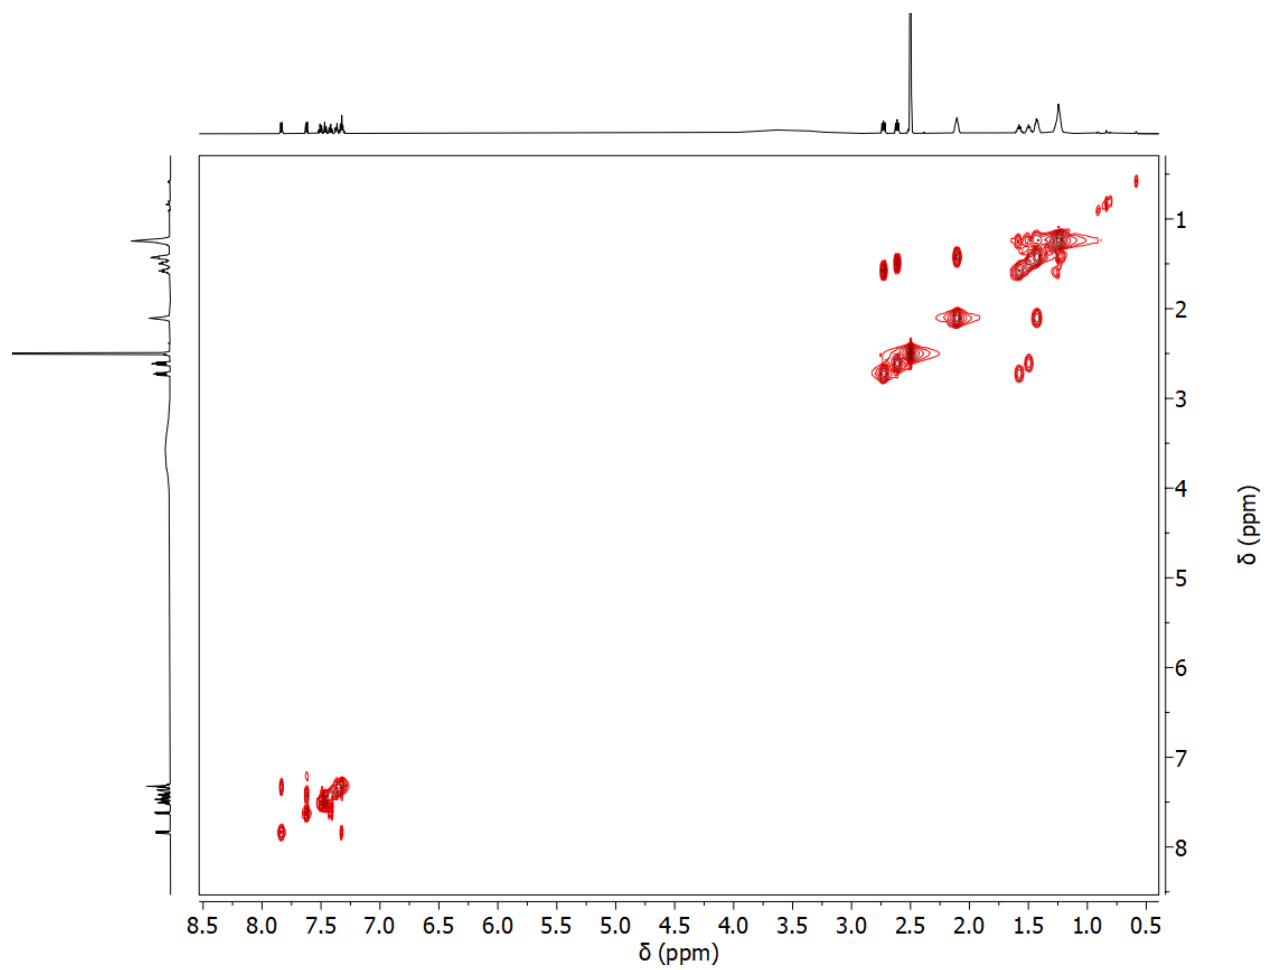

**Supplementary Figure 22. COSY NMR spectrum of parkamycin A.**

COSY NMR spectrum collected at 600 MHz in DMSO-*d*<sub>6</sub>

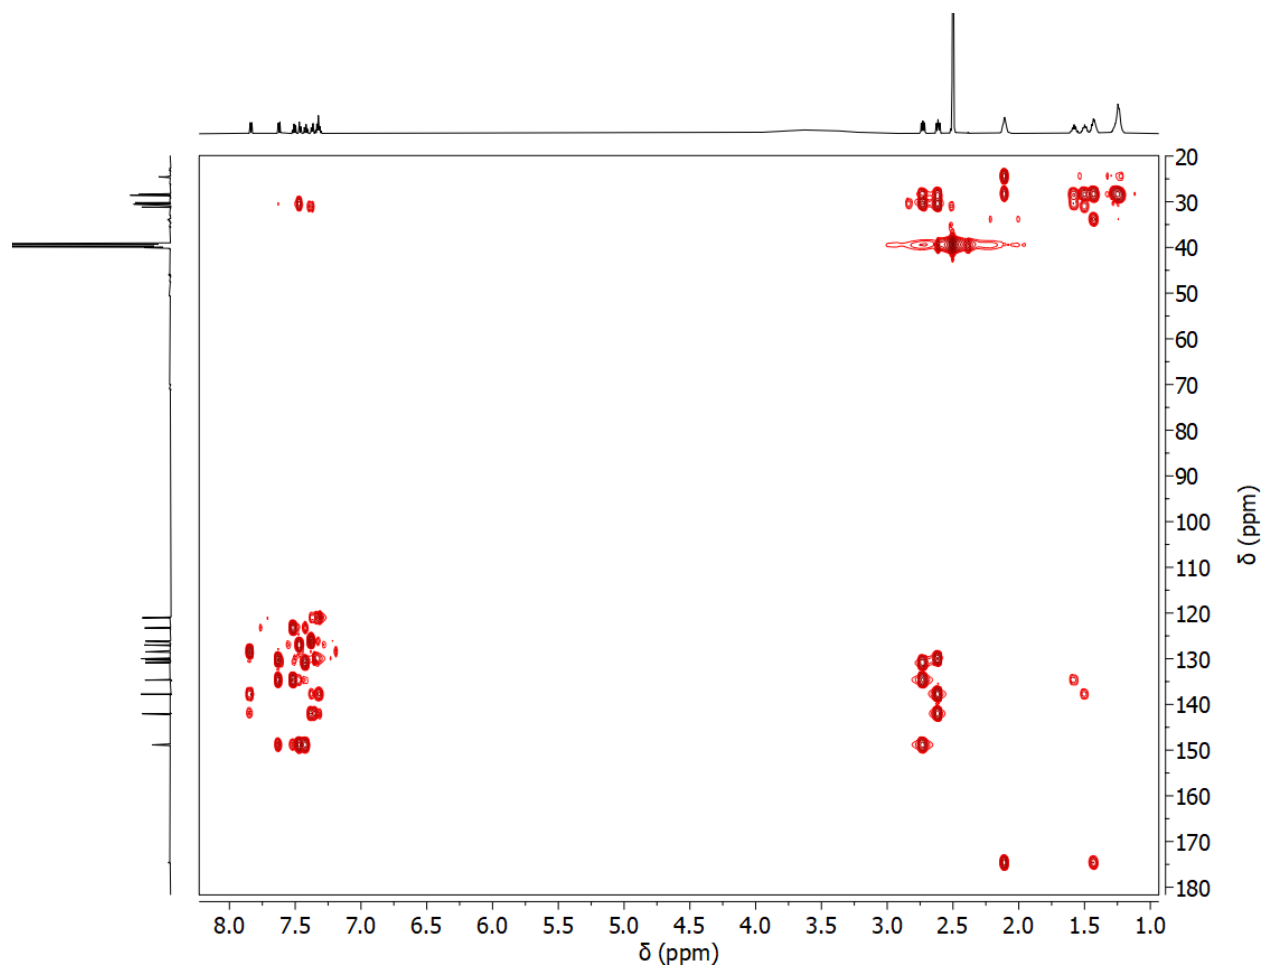

**Supplementary Figure 23. HMBC NMR spectrum of parkamycin A.**

HMBC NMR spectrum collected at 600 MHz in  $\text{DMSO-}d_6$

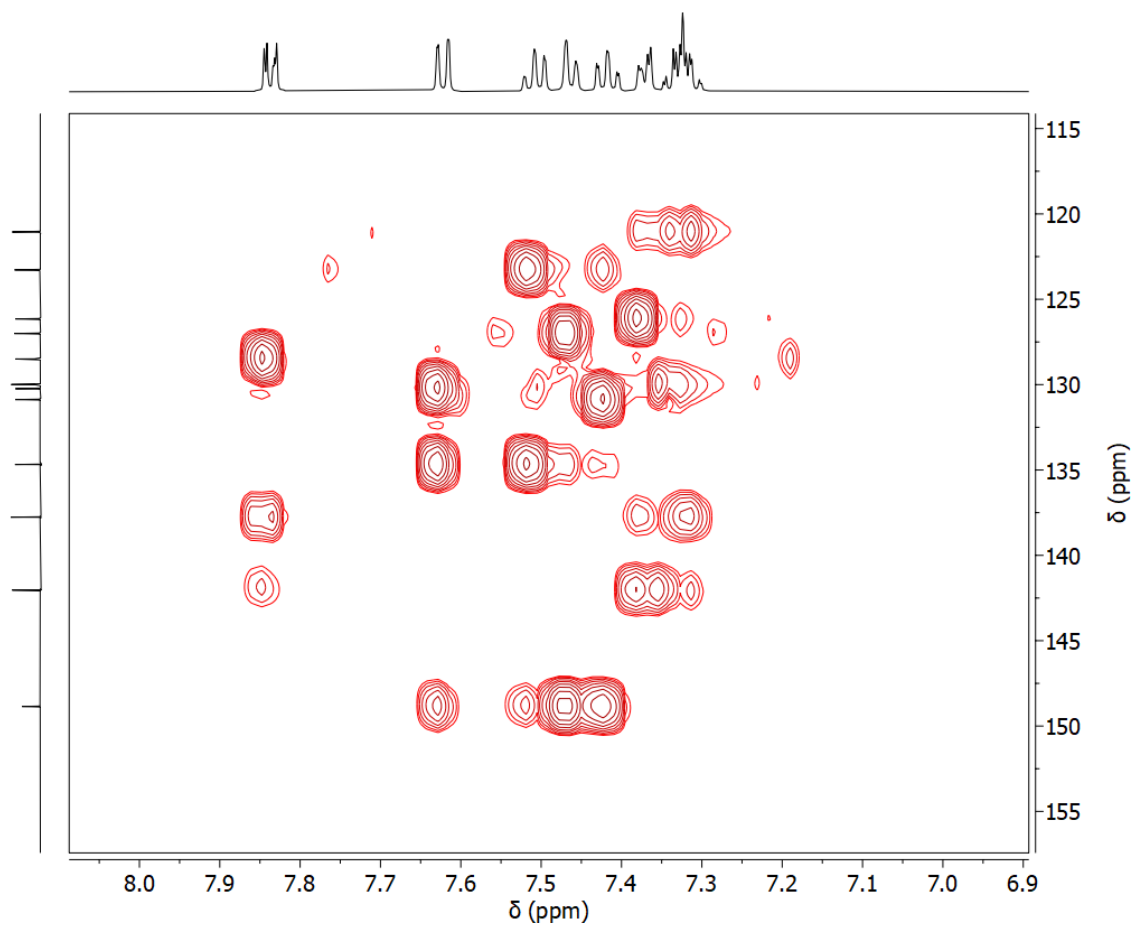

**Supplementary Figure 24. Expanded HMBC NMR spectrum of parkamycin A, region 1.**

Expanded HMBC NMR spectrum collected at 600 MHz in DMSO- $d_6$



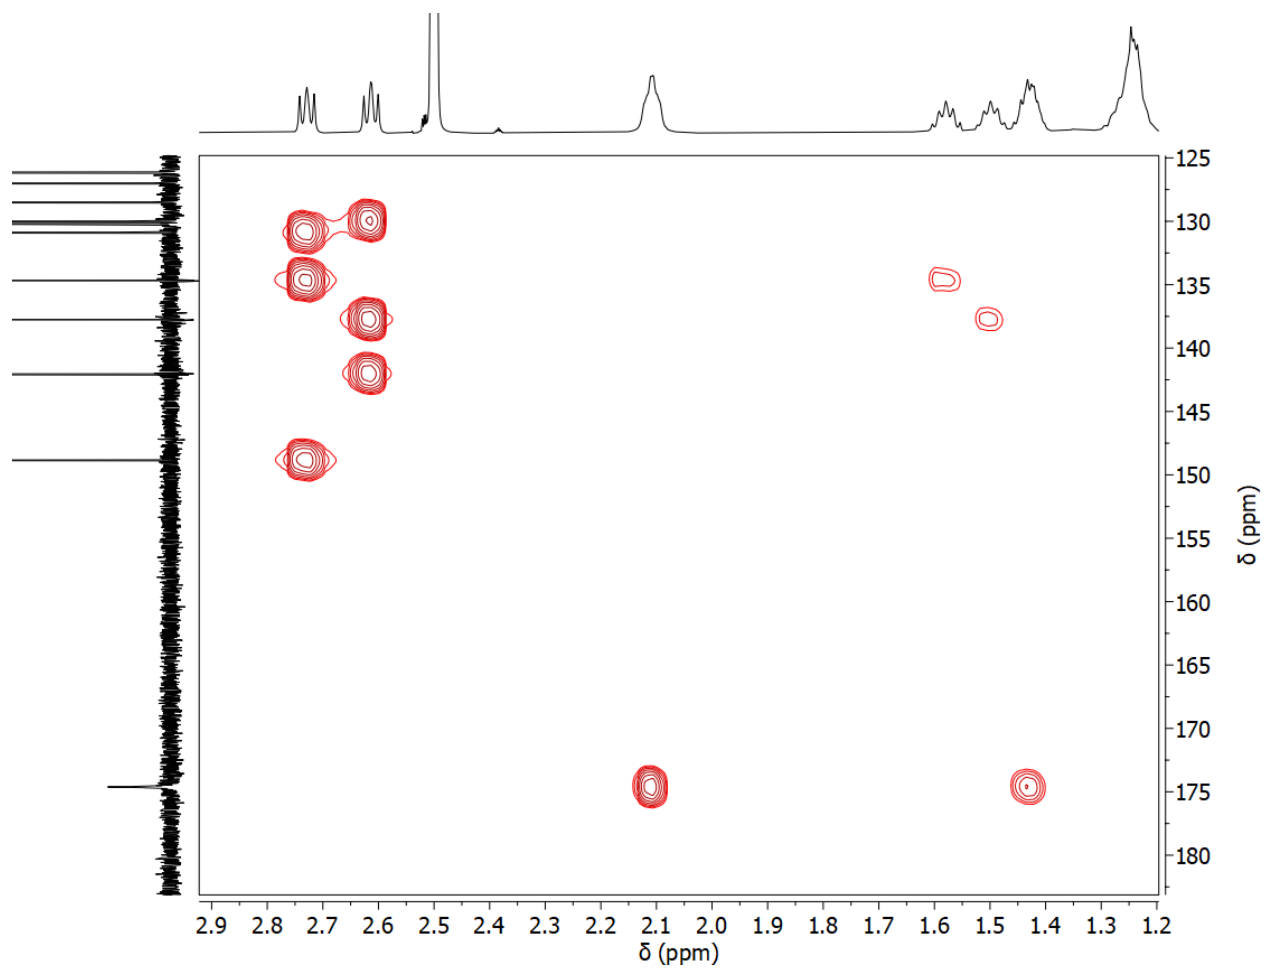

**Supplementary Figure 25. Expanded HMBC NMR spectrum of parkamycin A, region 2.**

Expanded HMBC NMR spectrum collected at 600 MHz in DMSO-*d*<sub>6</sub>

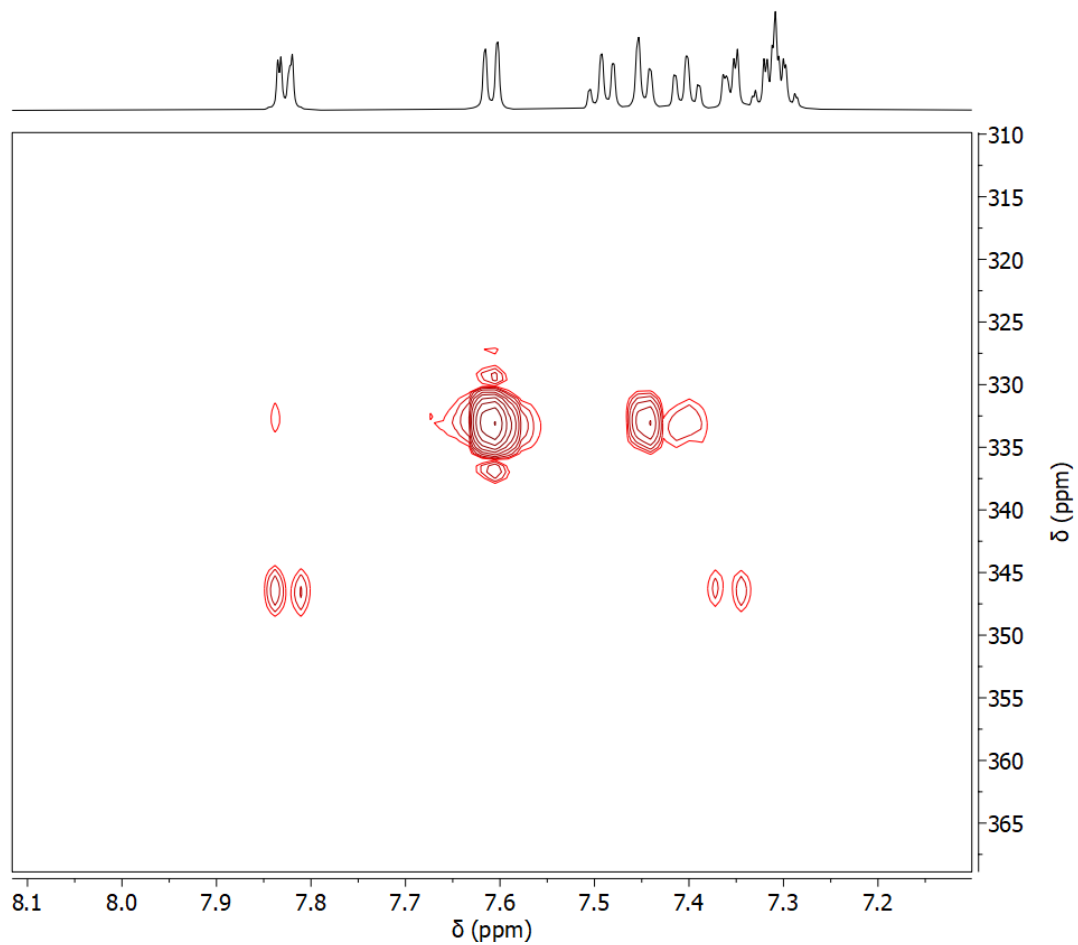

**Supplementary Figure 26.  $^{15}\text{N}$ -HMBC NMR spectrum of parkamycin A.**

$^{15}\text{N}$ -HMBC NMR spectrum collected at 600 MHz in DMSO-*d*<sub>6</sub>

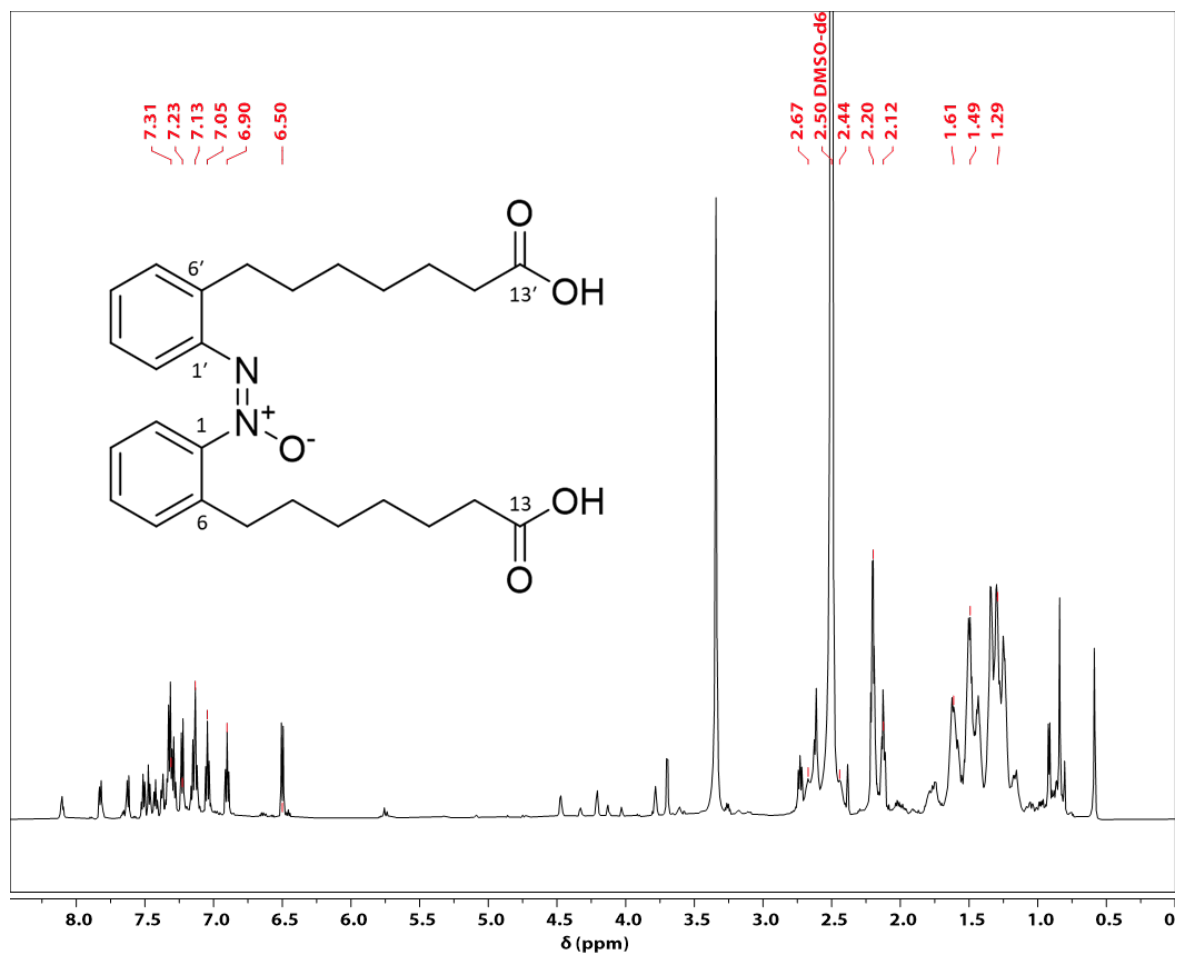

**Supplementary Figure 27. <sup>1</sup>H NMR spectrum of parkamycin B (semi pure).**

<sup>1</sup>H NMR spectrum collected at 600 MHz in DMSO-*d*<sub>6</sub>

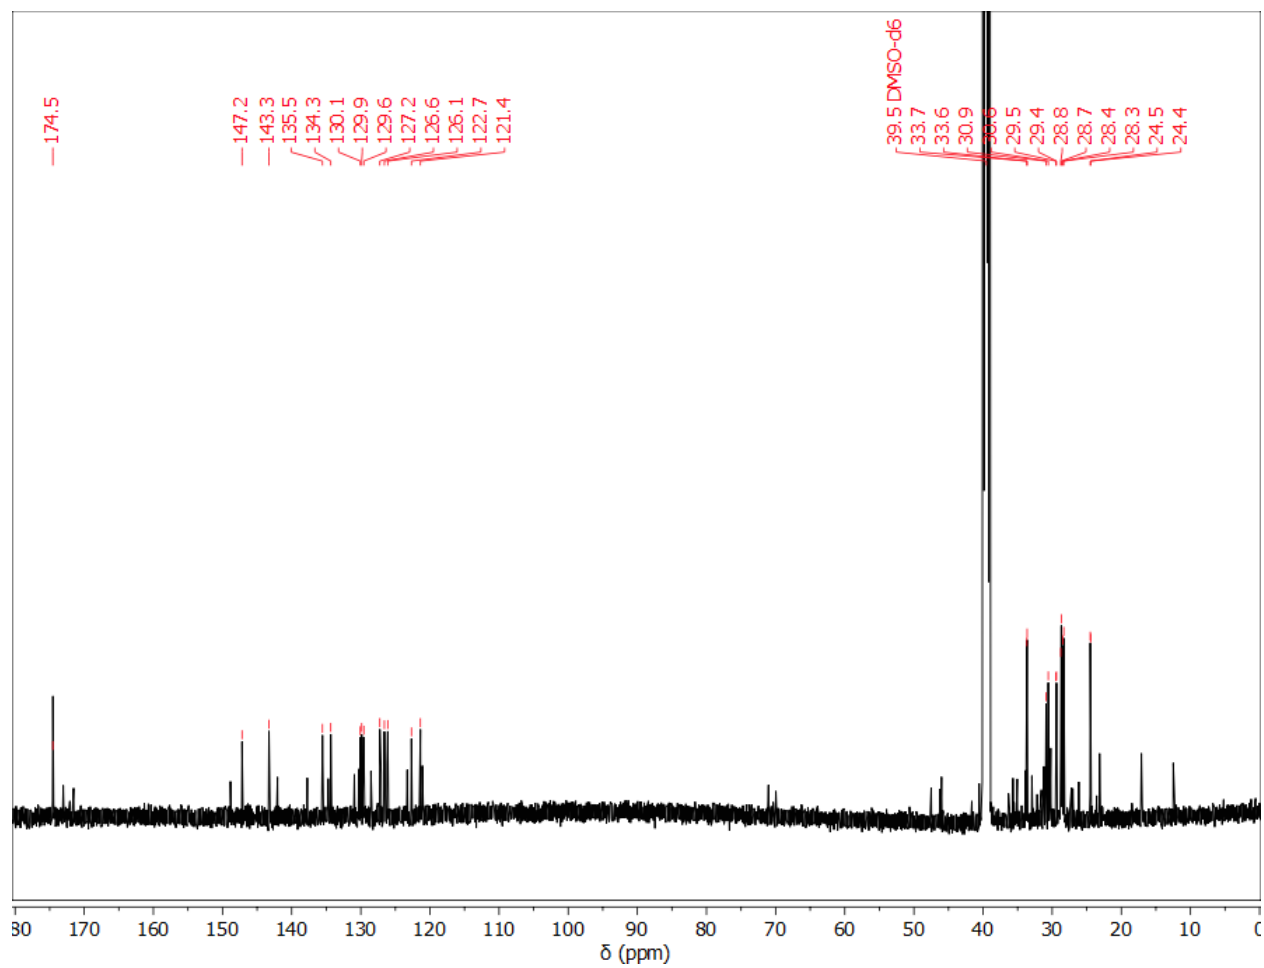

**Supplementary Figure 28.  $^{13}\text{C}$  NMR spectrum of parkamycin B (semi pure).**

$^{13}\text{C}$  NMR spectrum collected at 150 MHz in DMSO-*d*<sub>6</sub>

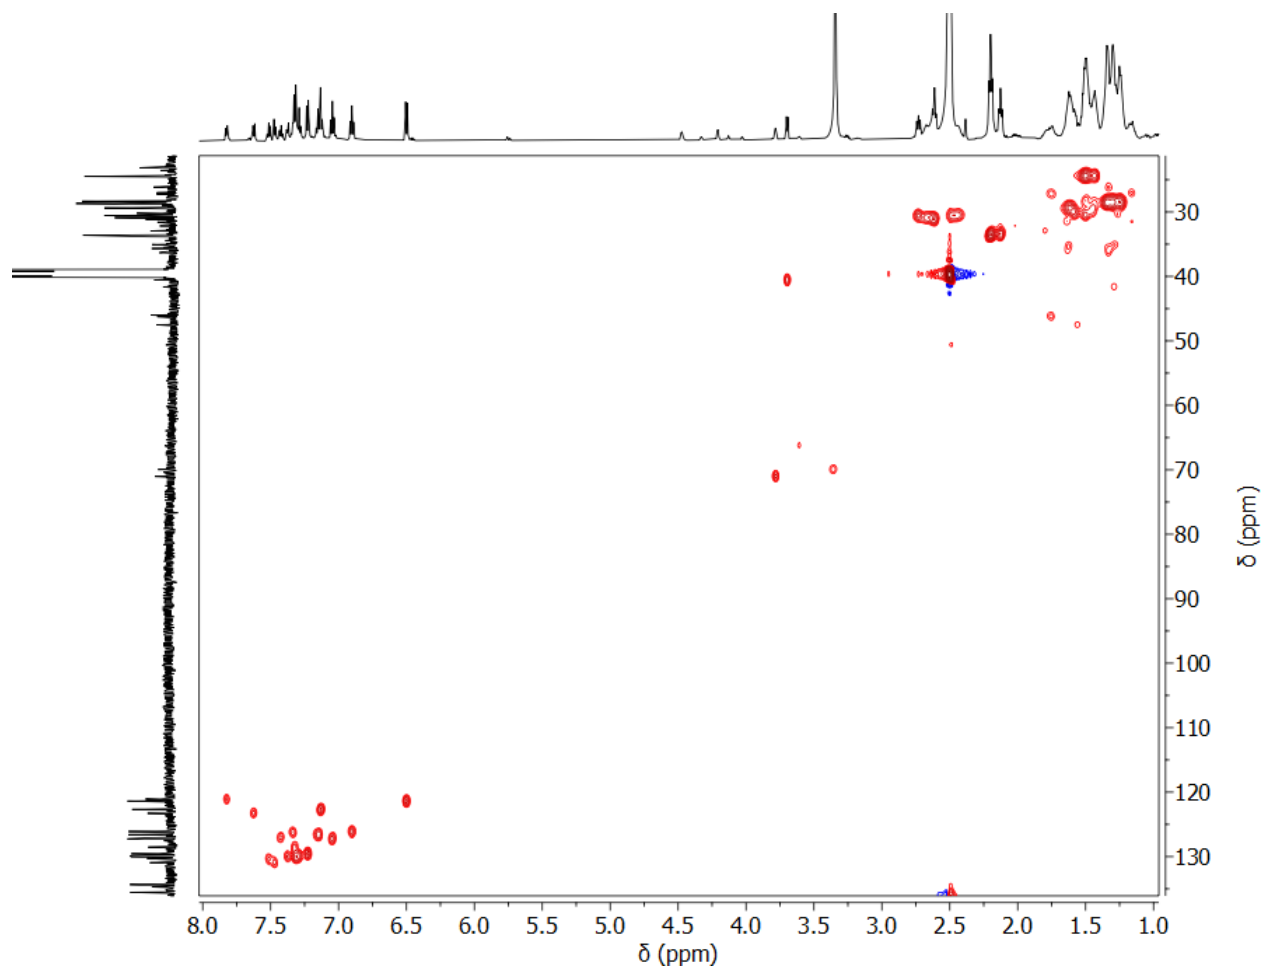

**Supplementary Figure 29. HSQC NMR spectrum of parkamycin B (semi pure).**

HSQC NMR spectrum collected at 600 MHz in DMSO-*d*<sub>6</sub>

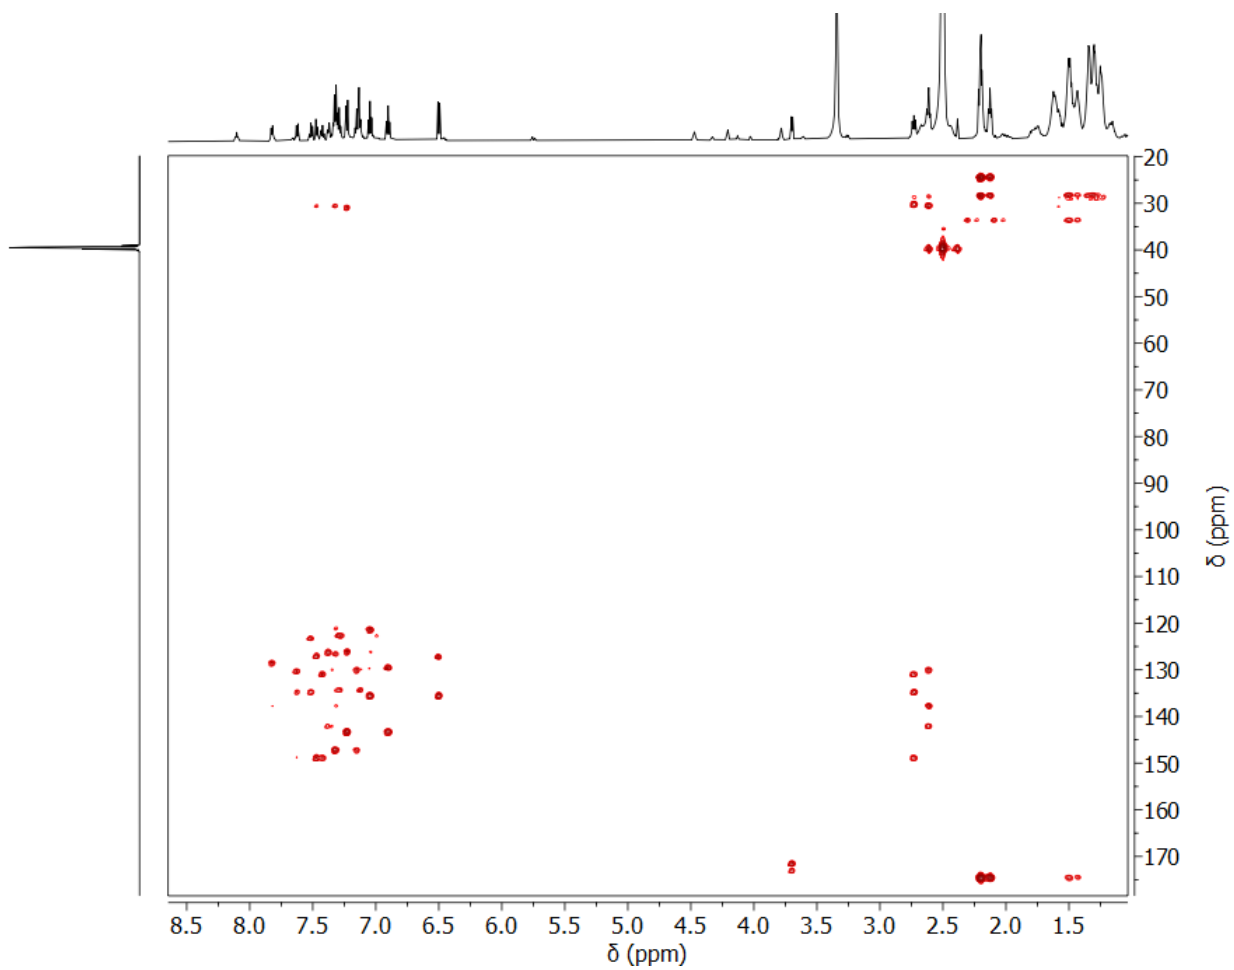

**Supplementary Figure 30. HMBC NMR spectrum of parkamycin B (semi pure).**

HMBC NMR spectrum collected at 600 MHz in DMSO-*d*<sub>6</sub>

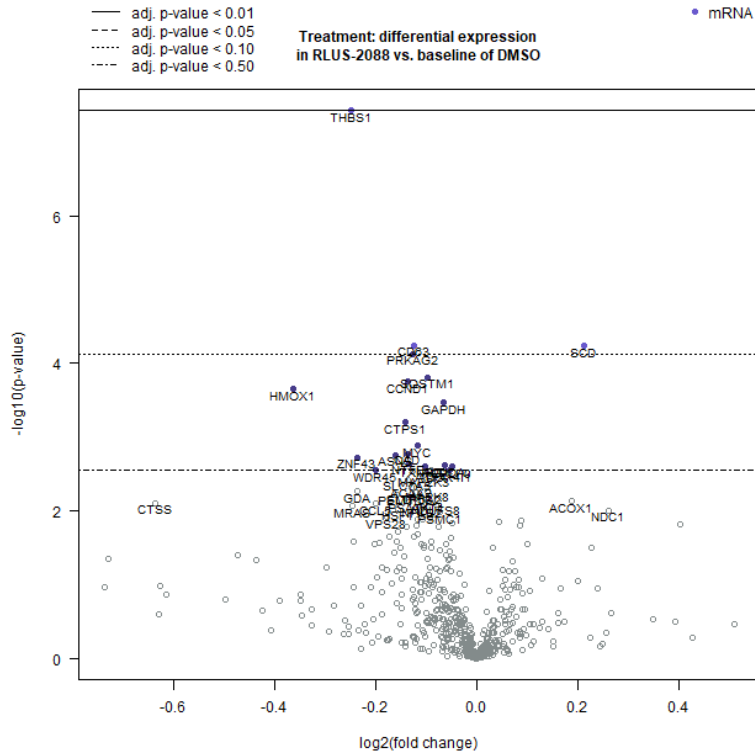

**Supplementary Figure 31. Volcano plot displaying differential gene expression in the Nanostring metabolism panel after treatment with RLUS-2088 (Parkamycin A).**

Differential gene expression is shown as  $\log_2$  fold change of treated compared to DMSO. Horizontal lines indicate various False Discovery Rate (FDR) thresholds. Genes are colored if the resulting p-value is below the given FDR or p-value threshold. The 40 most statistically significant genes are labeled in the plot.





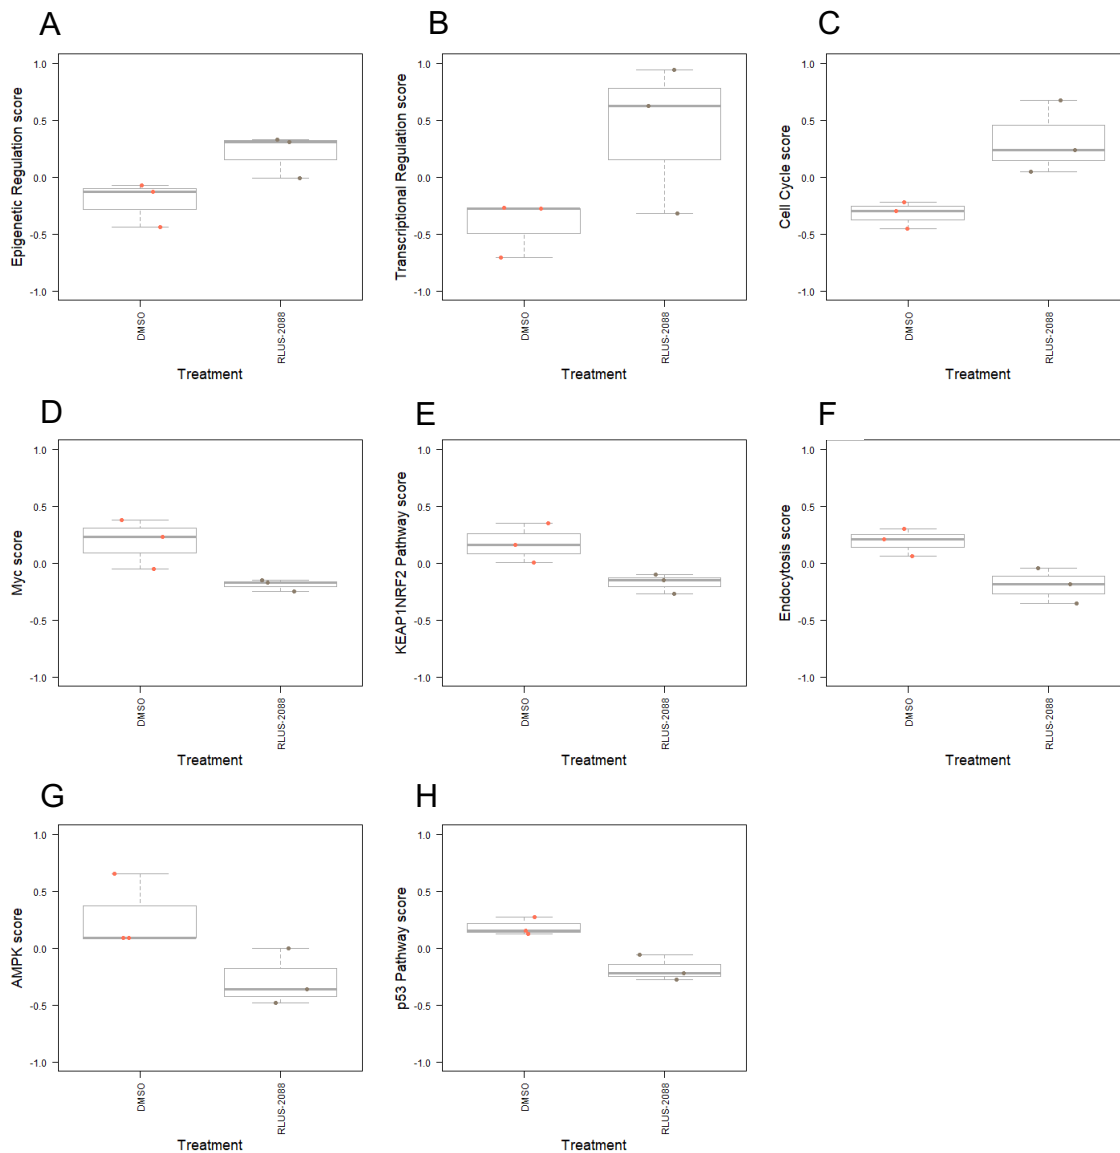

**Supplementary Figure 33. Comparison of pathway scores for select pathways altered with RLUS2088 (Parkamycin-A) treatment compared to DMSO.** Data shown is from n=3 independent biological replicates. A) epigenetic regulation, B) transcriptional regulation, C) cell cycle signaling, D) Myc, E) KEAP1/NRF2 pathway, F) endocytosis, G) AMPK , H) p53 pathway.

**Supplementary Table 1. Selleck library target representation.** The number of Selleck compounds in each target class. See Dataset S1 for a full list of compounds and annotations,

| Class                                 | Count |
|---------------------------------------|-------|
| Others                                | 674   |
| none                                  | 115   |
| I3K                                   | 33    |
| Histamine Receptor                    | 33    |
| HDAC                                  | 32    |
| AChR antagonist                       | 26    |
| COX                                   | 26    |
| Adrenergic Receptor antagonist        | 25    |
| Adrenergic Receptor agonist           | 25    |
| DNA/RNA Synthesis                     | 24    |
| CDK                                   | 22    |
| RAAS                                  | 21    |
| PDE                                   | 20    |
| 5HTR antagonist                       | 20    |
| VEGFR                                 | 20    |
| JAK                                   | 20    |
| Topoisomerase                         | 20    |
| Sodium Channel                        | 19    |
| mTOR                                  | 19    |
| HSP (e.g. HSP90)                      | 18    |
| Aurora Kinase                         | 17    |
| EGFR                                  | 17    |
| Calcium Channel                       | 17    |
| MEK                                   | 16    |
| Microtubule Associated                | 14    |
| PARP                                  | 13    |
| RAF                                   | 13    |
| 5HTR agonist                          | 13    |
| Reverse Transcriptase                 | 12    |
| P450 (e.g. CYP17)                     | 12    |
| Proteasome                            | 12    |
| Estrogen/progestogen Receptor_agonist | 11    |
| p38 MAPK                              | 11    |
| GSK-3                                 | 11    |
| EGFR_ERBB                             | 10    |
| Potassium Channel                     | 10    |
| Androgen Receptor antagonist          | 10    |
| Wnt/beta-catenin                      | 10    |
| IGF-1R                                | 9     |
| ATPase                                | 9     |
|                                       | 217   |

|                                          |   |
|------------------------------------------|---|
| TGF-beta/Smad                            | 9 |
| PPAR                                     | 9 |
| ABL                                      | 9 |
| Histone Methyltransferase                | 9 |
| Epigenetic Reader Domain                 | 9 |
| c-Met                                    | 9 |
| Dopamine Receptor antagonist             | 9 |
| Bcl-2                                    | 8 |
| HMG-CoA Reductase                        | 8 |
| IkB/IKK                                  | 8 |
| DUB                                      | 8 |
| Akt                                      | 8 |
| PDGFR                                    | 7 |
| GluR agonist                             | 7 |
| Gamma-secretase                          | 7 |
| GluR antagonist                          | 7 |
| PLK                                      | 7 |
| Dehydrogenase                            | 7 |
| FAK                                      | 7 |
| ATM/ATR                                  | 7 |
| HIV Protease                             | 6 |
| Syk                                      | 6 |
| DPP-4                                    | 6 |
| STAT                                     | 6 |
| Estrogen/progestogen Receptor_antagonist | 6 |
| Transferase                              | 6 |
| Src                                      | 6 |
| PKC                                      | 6 |
| AChR agonist                             | 6 |
| Hedgehog/Smoothened                      | 6 |
| p53                                      | 6 |
| Kinesin                                  | 6 |
| CFTR                                     | 6 |
| Autophagy                                | 5 |
| c-Kit                                    | 5 |
| Endothelin Receptor                      | 5 |
| SERT/NET                                 | 5 |
| Aromatase                                | 5 |
| FLT3                                     | 5 |
| SERT                                     | 5 |
| ROCK                                     | 5 |
| Caspase                                  | 5 |
| VEGFR_cKIT_PDGFR                         | 5 |
| Carbonic Anhydrase                       | 5 |

|                                    |   |
|------------------------------------|---|
| MMP                                | 5 |
| Dopamine Receptor agonist          | 5 |
| NF-kB                              | 5 |
| TNF-alpha                          | 5 |
| Integrase                          | 5 |
| DNA Methyltransferase              | 5 |
| GPR                                | 5 |
| Sirtuin                            | 4 |
| Histone demethylases               | 4 |
| HCV Protease                       | 4 |
| Opioid Receptor agonist            | 4 |
| Factor Xa                          | 4 |
| E3 Ligase                          | 4 |
| GABA Receptor antagonist           | 4 |
| Cysteine Protease                  | 4 |
| Opioid Receptor antagonist         | 4 |
| PDK-1                              | 4 |
| BTK                                | 4 |
| MET_VEGFR                          | 4 |
| Proton Pump                        | 4 |
| P2 Receptor                        | 4 |
| Pim                                | 4 |
| CETP                               | 4 |
| Estrogen/progestogen Receptor_SERM | 4 |
| IAP                                | 4 |
| OX Receptor                        | 4 |
| Chk                                | 4 |
| Cannabinoid Receptor agonist       | 4 |
| AMPK                               | 4 |
| Serine Protease                    | 3 |
| DHFR                               | 3 |
| BMP                                | 3 |
| Androgen Receptor agonist          | 3 |
| FAAH                               | 3 |
| FGFR                               | 3 |
| SGLT                               | 3 |
| S1P Receptor                       | 3 |
| LRRK2                              | 3 |
| ALK                                | 3 |
| Rac                                | 3 |
| Mdm2                               | 3 |
| CRM1                               | 3 |
| Hydroxylase                        | 3 |
| Rho                                | 3 |

|                                 |   |
|---------------------------------|---|
| p97                             | 3 |
| 5-alpha Reductase               | 3 |
| HIF                             | 3 |
| MAO                             | 3 |
| JNK                             | 3 |
| S6 Kinase                       | 3 |
| Telomerase                      | 3 |
| ELF4                            | 2 |
| Liver X Receptor                | 2 |
| PERK                            | 2 |
| CaSR                            | 2 |
| VDA                             | 2 |
| P-gp                            | 2 |
| Beta Amyloid                    | 2 |
| VEGFR_PDGFR                     | 2 |
| ERK                             | 2 |
| LPA Receptor                    | 2 |
| Dynamin                         | 2 |
| ELF2                            | 2 |
| HER2                            | 2 |
| PKA                             | 2 |
| Cannabinoid Receptor antagonist | 2 |
| PAK                             | 2 |
| cAMP                            | 2 |
| ERBB                            | 2 |
| CSF-1R                          | 2 |
| GABA Receptor agonist           | 2 |
| IDO                             | 2 |
| TRPV                            | 2 |
| FXR                             | 2 |
| Phospholipase (e.g. PLA)        | 2 |
| Ferroptosis                     | 2 |
| Cathepsin K                     | 2 |
| E2                              | 1 |
| DDP-4                           | 1 |
| MTH                             | 1 |
| NOD1                            | 1 |
| MNK                             | 1 |
| Survivin                        | 1 |
| IDH2                            | 1 |
| CXCR                            | 1 |
| PDHK                            | 1 |
| BMI                             | 1 |
| BET                             | 1 |

|                                   |   |
|-----------------------------------|---|
| Fo-ATPase                         | 1 |
| Tie-2                             | 1 |
| gp120/CD4                         | 1 |
| MBT                               | 1 |
| Wee1                              | 1 |
| Histone Acetyltransferase         | 1 |
| Axl                               | 1 |
| Substance P                       | 1 |
| AAAD/DOPA decarboxylase inhibitor | 1 |
| MT Receptor                       | 1 |
| Vasopressin Receptor              | 1 |
| ribonucleotide reductase          | 1 |
| c-Myc                             | 1 |
| APE                               | 1 |
| PAFR                              | 1 |
| IL Receptor                       | 1 |
| Ras                               | 1 |
| Ephrin receptor                   | 1 |
| GDP/GTP Exchange Factor Inhibitor | 1 |
| Procollagen C Proteinase          | 1 |
| CCR                               | 1 |
| Integrin                          | 1 |
| Notch                             | 1 |
| Arp2/3                            | 1 |
| E1 Activating                     | 1 |
| DNA-PK                            | 1 |
| ATGL                              | 1 |
| Ftase                             | 1 |
| Phosphorylase                     | 1 |

---

**Supplementary Table 2: K-means cluster membership in FUSION and CP for compounds in the top 30 largest target classes.**

| SWID       | Other_<br>ID | Pathway         | Cmpd.Name          | Fusion_<br>kmeans | CP kmeans |
|------------|--------------|-----------------|--------------------|-------------------|-----------|
| SW220242-1 | S2852        | 5HTR.agonist    | BRL-54443          | 1                 | 26        |
| SW197244-4 | S2025        | 5HTR.agonist    | Urapidil HCl       | 6                 | 26        |
| SW197596-2 | S1385        | 5HTR.agonist    | Mosapride Citrate  | 7                 | 22        |
|            |              |                 | Sumatriptan        |                   |           |
| SW197624-3 | S1432        | 5HTR.agonist    | Succinate          | 7                 | 22        |
| SW219416-1 | S1488        | 5HTR.agonist    | Naratriptan        | 7                 | 8         |
| SW219573-1 | S4109        | 5HTR.agonist    | Lorcaserin HCl     | 7                 | 10        |
| SW219882-1 | S1436        | 5HTR.agonist    | Tianeptine sodium  | 7                 | 12        |
| SW197762-2 | S1649        | 5HTR.agonist    | Zolmitriptan       | 21                | 3         |
| SW219198-2 | S2875        | 5HTR.agonist    | Prucalopride       | 21                | 25        |
|            |              |                 | Rizatriptan        |                   |           |
| SW197669-2 | S1607        | 5HTR.agonist    | Benzoate           | 23                | 18        |
| SW197521-3 | S1975        | 5HTR.agonist    | Aripiprazole       | 25                | 14        |
| SW219418-1 | S2096        | 5HTR.agonist    | Almotriptan Malate | 28                | 26        |
| SW220149-1 | S3180        | 5HTR.agonist    | Eletriptan HBr     | 28                | 3         |
| SW100810-5 | S1390        | 5HTR.antagonist | Ondansetron HCl    | 1                 | 26        |
|            |              |                 | Vortioxetine (Lu   |                   |           |
| SW219360-1 | S8021        | 5HTR.antagonist | AA21004) HBr       | 3                 | 20        |
| SW219880-1 | S4053        | 5HTR.antagonist | Sertraline HCl     | 3                 | 20        |
| SW196337-3 | S3183        | 5HTR.antagonist | Amitriptyline HCl  | 8                 | 24        |
| SW196384-4 | S2541        | 5HTR.antagonist | Clomipramine HCl   | 8                 | 22        |
| SW219879-1 | S1283        | 5HTR.antagonist | Asenapine          | 8                 | 5         |
|            |              |                 | WAY-100635         |                   |           |
| SW219571-1 | S2663        | 5HTR.antagonist | Maleate            | 19                | 30        |
| SW219811-1 | S2865        | 5HTR.antagonist | VUF 10166          | 19                | 16        |
| SW219375-1 | S2677        | 5HTR.antagonist | BRL-15572          | 20                | 14        |
| SW220247-1 | S2459        | 5HTR.antagonist | Clozapine          | 20                | 1         |
| SW220018-1 | S2894        | 5HTR.antagonist | SB742457           | 21                | 12        |
| SW220129-1 | S2849        | 5HTR.antagonist | SB269970 HCl       | 21                | 30        |
| SW198927-2 | S1898        | 5HTR.antagonist | Tropisetron        | 23                | 18        |
|            |              |                 | PRX-08066 Maleic   |                   |           |
| SW219157-1 | S8010        | 5HTR.antagonist | acid               | 23                | 27        |
| SW219941-1 | S2856        | 5HTR.antagonist | SB271046           | 25                | 20        |
| SW196882-3 | S2232        | 5HTR.antagonist | Ketanserin         | 26                | 11        |
| SW219177-1 | S1243        | 5HTR.antagonist | Agomelatine        | 26                | 13        |
| SW219736-1 | S2698        | 5HTR.antagonist | RS-127445          | 26                | 16        |
| SW220248-1 | S2493        | 5HTR.antagonist | Olanzapine         | 26                | 11        |
| SW197348-4 | S1615        | 5HTR.antagonist | Risperidone        | 28                | 12        |
|            |              |                 | Pancuronium        |                   |           |
| SW219131-1 | S2497        | AChR.antagonist | dibromide          | 1                 | 25        |
|            |              |                 | Solifenacin        |                   |           |
| SW219141-1 | S3048        | AChR.antagonist | succinate          | 3                 | 4         |
|            |              |                 | Orphenadrine       |                   |           |
| SW102176-4 | S2054        | AChR.antagonist | Citrate            | 6                 | 30        |
|            |              |                 | Gallamine          |                   |           |
| SW196544-3 | S2471        | AChR.antagonist | Triethiodide       | 7                 | 1         |
|            |              |                 | Diphepanil         |                   |           |
| SW196713-3 | S4034        | AChR.antagonist | Methylsulfate      | 7                 | 25        |
| SW197005-3 | S4027        | AChR.antagonist | Flavoxate HCl      | 7                 | 3         |
|            |              |                 | Homatropine        |                   |           |
| SW219039-1 | S4024        | AChR.antagonist | Methylbromide      | 7                 | 25        |

|            |       |                             |                                                       |    |    |
|------------|-------|-----------------------------|-------------------------------------------------------|----|----|
| SW219041-1 | S2547 | AChR.antagonist             | Tiotropium Bromide hydrate                            | 7  | 11 |
| SW220294-1 | S2130 | AChR.antagonist             | Atropine                                              | 7  | 8  |
|            |       |                             | Homatropine                                           |    |    |
| SW219082-1 | S4025 | AChR.antagonist             | Bromide                                               | 12 | 25 |
| SW219426-1 | S3144 | AChR.antagonist             | Darifenacin HBr                                       | 12 | 24 |
|            |       |                             | 5-hydroxymethyl Tolterodine (PNU 200577; 5-HMT; 5-HM) | 12 | 17 |
| SW219846-1 | S2659 | AChR.antagonist             | Biperiden HCl                                         | 15 | 14 |
| SW196970-2 | S1285 | AChR.antagonist             | Tolterodine tartrate                                  | 15 | 14 |
| SW197495-2 | S2550 | AChR.antagonist             | Oxybutynin chloride                                   | 16 | 4  |
| SW196787-4 | S3117 | AChR.antagonist             | Tropicamide                                           | 23 | 18 |
| SW196691-3 | S1913 | AChR.antagonist             | Pyridostigmine Bromide                                | 23 | 26 |
| SW199029-2 | S1608 | AChR.antagonist             | Rivastigmine Tartrate                                 | 23 | 26 |
| SW199663-2 | S2087 | AChR.antagonist             | Fesoterodine Fumarate                                 | 24 | 8  |
| SW219290-1 | S2240 | AChR.antagonist             | Scopolamine HBr                                       | 26 | 30 |
| SW199343-2 | S2508 | AChR.antagonist             | Methscopolamine                                       | 26 | 22 |
| SW219038-1 | S1978 | AChR.antagonist             | Hyoscyamine                                           | 26 | 1  |
| SW219548-1 | S4014 | AChR.antagonist             | Rocuronium Bromide                                    | 28 | 20 |
| SW219130-1 | S1397 | AChR.antagonist             | Tropium chloride                                      | 28 | 18 |
| SW219146-1 | S2549 | AChR.antagonist             | Acridinium Bromide                                    | 28 | 26 |
| SW219176-1 | S4031 | AChR.antagonist             | Otilonium Bromide                                     | 29 | 9  |
| SW219209-1 | S3047 | AChR.antagonist             | Indacaterol Maleate                                   | 3  | 4  |
| SW220145-1 | S3083 | Adrenergic.Receptor.agonist | Formoterol Hemifumarate                               | 6  | 16 |
| SW199659-2 | S2020 | Adrenergic.Receptor.agonist | Oxymetazoline HCl                                     | 7  | 25 |
| SW196632-3 | S2495 | Adrenergic.Receptor.agonist | Tetrahydrozoline HCl                                  | 7  | 11 |
| SW197098-3 | S4043 | Adrenergic.Receptor.agonist | Synephrine HCl                                        | 7  | 8  |
| SW197214-4 | S2438 | Adrenergic.Receptor.agonist | L-Adrenaline                                          | 7  | 25 |
| SW219274-1 | S2522 | Adrenergic.Receptor.agonist | Epinephrine Bitartrate                                | 7  | 11 |
| SW219274-2 | S2521 | Adrenergic.Receptor.agonist | Naphazoline HCl                                       | 12 | 23 |
| SW196701-3 | S2519 | Adrenergic.Receptor.agonist | Isoprenaline HCl                                      | 12 | 11 |
| SW197212-2 | S2566 | Adrenergic.Receptor.agonist | Synephrine                                            | 13 | 25 |
| SW197214-5 | S2362 | Adrenergic.Receptor.agonist | Epinephrine HCl                                       | 13 | 25 |
| SW219274-3 | S3061 | Adrenergic.Receptor.agonist | Dexmedetomidine                                       | 13 | 1  |
| SW219607-1 | S3075 | Adrenergic.Receptor.agonist | Bambuterol HCl                                        | 16 | 20 |
| SW196915-3 | S4277 | Adrenergic.Receptor.agonist |                                                       |    |    |



|            |       |                                |                                |    |    |
|------------|-------|--------------------------------|--------------------------------|----|----|
| SW197048-3 | S2516 | Adrenergic.Receptor.agonist    | Xylazine HCl                   | 20 | 30 |
| SW197681-3 | S2458 | Adrenergic.Receptor.agonist    | Clonidine HCl                  | 20 | 11 |
| SW219096-1 | S2545 | Adrenergic.Receptor.agonist    | Scopine                        | 20 | 1  |
| SW220261-1 | S3185 | Adrenergic.Receptor.agonist    | Adrenalone HCl                 | 20 | 25 |
| SW220301-1 | S4009 | Adrenergic.Receptor.agonist    | Mirabegron                     | 20 | 26 |
| SW199068-2 | S1437 | Adrenergic.Receptor.agonist    | Tizanidine HCl                 | 21 | 22 |
| SW219239-1 | S3060 | Adrenergic.Receptor.agonist    | Medetomidine HCl               | 24 | 3  |
| SW197044-3 | S4065 | Adrenergic.Receptor.agonist    | Guanabenz Acetate              | 26 | 30 |
| SW219275-1 | S2533 | Adrenergic.Receptor.agonist    | Ritodrine HCl                  | 26 | 1  |
| SW219446-1 | S2569 | Adrenergic.Receptor.agonist    | Phenylephrine HCl              | 28 | 3  |
| SW219456-1 | S2092 | Adrenergic.Receptor.agonist    | Detomidine HCl                 | 28 | 8  |
| SW219607-2 | S2090 | Adrenergic.Receptor.agonist    | Dexmedetomidine HCl (Precedex) | 28 | 26 |
| SW197547-3 | S1831 | Adrenergic.Receptor.antagonist | Carvedilol                     | 3  | 2  |
| SW219269-1 | S1549 | Adrenergic.Receptor.antagonist | Nebivolol                      | 3  | 16 |
| SW199199-2 | S1856 | Adrenergic.Receptor.antagonist | Metoprolol Tartrate            | 6  | 26 |
| SW196705-3 | S4010 | Adrenergic.Receptor.antagonist | Acebutolol HCl                 | 7  | 26 |
| SW196913-4 | S1409 | Adrenergic.Receptor.antagonist | Alfuzosin HCl                  | 7  | 18 |
| SW219414-1 | S4076 | Adrenergic.Receptor.antagonist | Propranolol HCl                | 7  | 24 |
| SW196892-3 | S2517 | Adrenergic.Receptor.antagonist | Maprotiline HCl                | 8  | 27 |
| SW197099-3 | S1324 | Adrenergic.Receptor.antagonist | Doxazosin Mesylate             | 8  | 5  |
| SW219365-1 | S2691 | Adrenergic.Receptor.antagonist | BMV 7378                       | 12 | 24 |
| SW196595-3 | S4291 | Adrenergic.Receptor.antagonist | Labetalol HCl                  | 15 | 22 |
| SW197155-3 | S4278 | Adrenergic.Receptor.antagonist | Carteolol HCl                  | 15 | 10 |
| SW196909-3 | S4124 | Adrenergic.Receptor.antagonist | Tolazoline HCl                 | 16 | 3  |
| SW197151-3 | S1206 | Adrenergic.Receptor.antagonist | Bisoprolol fumarate            | 20 | 26 |
| SW197352-4 | S2509 | Adrenergic.Receptor.antagonist | Sotalol                        | 20 | 1  |
| SW196570-4 | S2126 | Adrenergic.Receptor.antagonist | Naftopidil                     | 21 | 11 |
| SW196637-3 | S2038 | Adrenergic.Receptor.antagonist | Phentolamine Mesylate          | 23 | 11 |

|            |       |                                    |                                          |    |    |
|------------|-------|------------------------------------|------------------------------------------|----|----|
| SW196917-4 | S1827 | Adrenergic.Receptor.anta<br>gonist | Betaxolol<br>hydrochloride<br>(Betoptic) | 23 | 27 |
| SW196917-5 | S2091 | Adrenergic.Receptor.anta<br>gonist | Betaxolol                                | 23 | 30 |
| SW197327-3 | S2499 | Adrenergic.Receptor.anta<br>gonist | Phenoxybenzamin<br>e HCl                 | 24 | 29 |
| SW222230-1 | S2113 | Adrenergic.Receptor.anta<br>gonist | Cisatracurium<br>Besylate                | 24 | 8  |
| SW196457-4 | S2059 | Adrenergic.Receptor.anta<br>gonist | Terazosin HCl                            | 28 | 26 |
| SW196570-5 | S1387 | Adrenergic.Receptor.anta<br>gonist | Naftopidil DiHCl                         | 28 | 23 |
| SW197240-3 | S4123 | Adrenergic.Receptor.anta<br>gonist | Timolol Maleate                          | 28 | 12 |
| SW219300-1 | S2086 | Adrenergic.Receptor.anta<br>gonist | Ivabradine HCl                           | 28 | 30 |
| SW219765-1 | S1613 | Adrenergic.Receptor.anta<br>gonist | Silodosin                                | 28 | 26 |
| SW219886-1 | S1154 | Aurora.Kinase                      | SNS-314 Mesylate                         | 2  | 21 |
| SW219458-1 | S7065 | Aurora.Kinase                      | MK-8745                                  | 6  | 2  |
| SW220051-1 | S2718 | Aurora.Kinase                      | TAK-901                                  | 10 | 2  |
| SW219462-1 | S1107 | Aurora.Kinase                      | Danusertib (PHA-<br>739358)              | 13 | 15 |
| SW219643-1 | S1100 | Aurora.Kinase                      | MLN8054                                  | 15 | 21 |
| SW219491-1 | S1171 | Aurora.Kinase                      | CYC116                                   | 17 | 28 |
| SW220282-1 | S1103 | Aurora.Kinase                      | ZM 447439                                | 18 | 6  |
| SW219480-1 | S1519 | Aurora.Kinase                      | CCT129202                                | 19 | 6  |
| SW219431-1 | S1147 | Aurora.Kinase                      | Barasertib<br>(AZD1152-HQPA)             | 21 | 28 |
| SW219731-1 | S2719 | Aurora.Kinase                      | AMG-900                                  | 22 | 28 |
| SW220174-1 | S2770 | Aurora.Kinase                      | MK-5108 (VX-689)<br>VX-680               | 23 | 6  |
| SW212828-2 | S1048 | Aurora.Kinase                      | (Tozasertib; MK-<br>0457)                | 25 | 6  |
| SW219481-1 | S2744 | Aurora.Kinase                      | CCT137690                                | 25 | 21 |
| SW219771-1 | S1133 | Aurora.Kinase                      | Alisertib<br>(MLN8237)                   | 27 | 6  |
| SW219373-1 | S1454 | Aurora.Kinase                      | PHA-680632                               | 29 | 15 |
| SW220199-1 | S1451 | Aurora.Kinase                      | Aurora A Inhibitor I                     | 29 | 27 |
| SW219406-1 | S1529 | Aurora.Kinase                      | Hesperadin                               | 30 | 15 |
| SW219347-1 | S2481 | Calcium.Channel                    | Manidipine                               | 2  | 29 |
| SW219784-1 | S1293 | Calcium.Channel                    | Cilnidipine                              | 2  | 29 |
| SW219238-1 | S1747 | Calcium.Channel                    | Nimodipine                               | 4  | 29 |
| SW219299-1 | S1885 | Calcium.Channel                    | Felodipine                               | 6  | 27 |
| SW197582-2 | S2017 | Calcium.Channel                    | Benidipine HCl                           | 14 | 4  |
| SW197620-3 | S1425 | Calcium.Channel                    | Ranolazine 2HCl                          | 15 | 14 |
| SW219737-1 | S2491 | Calcium.Channel                    | Nitrendipine                             | 15 | 5  |
| SW219720-1 | S2403 | Calcium.Channel                    | Tetrandrine                              | 18 | 12 |
| SW196411-3 | S2573 | Calcium.Channel                    | Tetracaine HCl                           | 20 | 26 |
| SW219572-1 | S2721 | Calcium.Channel                    | Nilvadipine                              | 21 | 20 |
| SW220228-1 | S1905 | Calcium.Channel                    | Amlodipine                               | 23 | 3  |
| SW219840-1 | S1994 | Calcium.Channel                    | Lacidipine                               | 27 | 5  |
| SW196530-3 | S2030 | Calcium.Channel                    | Flunarizine 2HCl                         | 28 | 4  |
| SW220017-1 | S1662 | Calcium.Channel                    | Isradipine                               | 28 | 23 |

|            |       |                 |                                 |    |    |
|------------|-------|-----------------|---------------------------------|----|----|
| SW220087-1 | S2080 | Calcium.Channel | Clevidipine                     |    |    |
| SW219236-1 | S3053 | Calcium.Channel | Butyrate                        | 28 | 16 |
| SW219348-1 | S2482 | Calcium.Channel | Azelnidipine                    | 29 | 12 |
| SW219166-1 | S2014 | CDK             | Manidipine 2HCl                 | 29 | 16 |
| SW219356-1 | S1572 | CDK             | BMS-265246                      | 5  | 19 |
| SW220101-1 | S7440 | CDK             | BS-181 HCl                      | 6  | 20 |
| SW219405-1 | S7158 | CDK             | LEE011                          | 8  | 5  |
| SW219631-1 | S7461 | CDK             | LY2835219                       | 10 | 19 |
| SW219878-1 | S2742 | CDK             | LDC000067                       | 10 | 19 |
|            |       |                 | PHA-767491                      | 10 | 28 |
| SW219949-1 | S2751 | CDK             | Miliclib (PHA-848125)           | 10 | 28 |
|            |       |                 | MK-8776 (SCH 900776)            | 10 | 21 |
| SW219954-1 | S2735 | CDK             | PHA-793887                      | 10 | 28 |
| SW220252-1 | S1487 | CDK             | Flavopiridol HCl                | 11 | 28 |
| SW219231-1 | S2679 | CDK             | P276-00                         | 11 | 28 |
| SW219310-1 | S8058 | CDK             | SNS-032 (BMS-387032)            | 11 | 28 |
|            |       |                 | AZD5438                         | 11 | 28 |
| SW219478-1 | S1145 | CDK             | Dinaciclib (SCH727965)          | 11 | 28 |
| SW219680-1 | S2621 | CDK             | R547                            | 11 | 28 |
|            |       |                 | TG003                           | 12 | 6  |
| SW220016-1 | S2768 | CDK             | Roscovitine (Seliciclib;CYC202) | 13 | 28 |
| SW220191-1 | S2688 | CDK             | NU6027                          | 14 | 26 |
| SW219950-1 | S7320 | CDK             | ML167                           | 14 | 8  |
|            |       |                 | JNJ-7706621                     | 19 | 19 |
| SW220195-1 | S1153 | CDK             | Palbociclib (PD-0332991) HCl    | 27 | 5  |
| SW220039-1 | S7114 | CDK             | AT7519                          | 30 | 21 |
| SW220083-1 | S7509 | CDK             | Rofecoxib                       | 5  | 14 |
| SW219396-1 | S1249 | CDK             | Mefenamic Acid                  | 7  | 14 |
|            |       |                 | Phenacetin                      | 7  | 26 |
| SW220131-1 | S1116 | CDK             | Valdecoxib                      | 7  | 10 |
| SW219609-1 | S1524 | CDK             | Ampiroxicam                     | 7  | 26 |
| SW219668-1 | S3043 | COX             | Bufexamac                       | 14 | 13 |
| SW196700-3 | S4078 | COX             | Licofelone                      | 14 | 16 |
| SW196989-3 | S2577 | COX             | Diclofenac Sodium               | 16 | 20 |
| SW197564-2 | S4049 | COX             | Meclofenamate Sodium            | 19 | 4  |
| SW219542-1 | S4011 | COX             | Sodium                          | 19 | 4  |
| SW196831-3 | S3023 | COX             | Triflusal                       | 20 | 26 |
| SW219543-1 | S2121 | COX             | Lumiracoxib                     | 20 | 26 |
| SW196404-3 | S1903 | COX             | Tolfenamic Acid                 | 23 | 26 |
|            |       |                 | Naproxen                        | 23 | 26 |
| SW219723-1 | S4295 | COX             | Piroxicam                       | 23 | 20 |
| SW196982-3 | S3200 | COX             | Acemetacin                      | 26 | 26 |
| SW219769-1 | S2903 | COX             | Nabumetone                      | 26 | 30 |
| SW196753-3 | S1959 | COX             | Asaraldehyde                    | 26 | 22 |
| SW197105-3 | S1626 | COX             | Celecoxib                       | 27 | 20 |
| SW219862-1 | S1713 | COX             | Flunixin Meglumine              | 28 | 30 |
| SW196824-3 | S2602 | COX             | Ketoprofen                      | 28 | 2  |
| SW197312-3 | S4051 | COX             | Nimesulide                      | 28 | 11 |
| SW219241-1 | S2531 | COX             | Ketorolac                       | 28 | 30 |
| SW199611-3 | S1261 | COX             | Ibuprofen                       | 28 | 3  |
| SW196448-3 | S2108 | COX             |                                 |    |    |
| SW196784-3 | S1645 | COX             |                                 |    |    |
| SW196785-3 | S2040 | COX             |                                 |    |    |
| SW197293-4 | S1646 | COX             |                                 |    |    |
| SW203738-2 | S1638 | COX             |                                 |    |    |

|            |       |                   |                                  |    |    |
|------------|-------|-------------------|----------------------------------|----|----|
| SW219801-1 | S3008 | COX               | Zaltoprofen                      | 28 | 3  |
| SW220125-1 | S2047 | COX               | Lornoxicam                       | 28 | 14 |
| SW197496-2 | S1289 | DNA.RNA.Synthesis | Carmofur                         | 1  | 7  |
| SW197705-2 | S1192 | DNA.RNA.Synthesis | Raltitrexed                      | 1  | 7  |
| SW199617-3 | S1209 | DNA.RNA.Synthesis | Fluorouracil (5-Fluoracil; 5-FU) | 1  | 7  |
| SW199090-2 | S1305 | DNA.RNA.Synthesis | Mercaptopurine (6-MP)            | 2  | 19 |
| SW197258-4 | S4288 | DNA.RNA.Synthesis | Chloroambucil                    | 4  | 28 |
| SW219115-1 | S4297 | DNA.RNA.Synthesis | Mupirocin                        | 5  | 11 |
| SW220050-1 | S2029 | DNA.RNA.Synthesis | Uridine                          | 6  | 25 |
| SW220241-1 | S1300 | DNA.RNA.Synthesis | FT-207 (NSC 148958)              | 7  | 20 |
| SW222225-1 | S1166 | DNA.RNA.Synthesis | Cisplatin                        | 11 | 10 |
| SW000346-2 | S2554 | DNA.RNA.Synthesis | Daphnetin                        | 12 | 22 |
| SW218080-2 | S1218 | DNA.RNA.Synthesis | Clofarabine                      | 12 | 28 |
| SW218086-2 | S1213 | DNA.RNA.Synthesis | Nelarabine                       | 12 | 7  |
| SW218146-2 | S1229 | DNA.RNA.Synthesis | Fludarabine                      |    |    |
| SW222226-1 | S1214 | DNA.RNA.Synthesis | Phosphate                        | 12 | 7  |
| SW197746-4 | S1199 | DNA.RNA.Synthesis | Bleomycin Sulfate                | 13 | 19 |
| SW199649-2 | S1714 | DNA.RNA.Synthesis | Cladribine                       | 16 | 28 |
| SW219867-1 | S1221 | DNA.RNA.Synthesis | Gemcitabine                      | 16 | 28 |
| SW220273-1 | S1299 | DNA.RNA.Synthesis | Dacarbazine                      | 19 | 30 |
| SW219881-1 | S1983 | DNA.RNA.Synthesis | Floxuridine                      | 19 | 7  |
| SW197177-4 | S1302 | DNA.RNA.Synthesis | Adenine HCl                      | 20 | 24 |
| SW219116-1 | S2794 | DNA.RNA.Synthesis | Ifosfamide                       | 21 | 14 |
| SW219388-1 | S1334 | DNA.RNA.Synthesis | Sofosbuvir (PSI-7977; GS-7977)   | 26 | 11 |
| SW219151-1 | S1224 | DNA.RNA.Synthesis | Flupirtine maleate               | 26 | 8  |
| SW220171-1 | S1156 | DNA.RNA.Synthesis | Oxaliplatin                      | 27 | 28 |
| SW219272-1 | S1143 | EGFR              | Capecitabine                     | 30 | 14 |
| SW219447-1 | S1023 | EGFR              | AG-490 (Tyrphostin B42)          | 1  | 13 |
| SW219475-1 | S7284 | EGFR              | Erlotinib HCl (OSI-744)          | 2  | 18 |
| SW219315-1 | S1173 | EGFR              | CO-1686 (AVL-301)                | 2  | 6  |
| SW219395-1 | S1179 | EGFR              | WZ4002                           | 17 | 3  |
| SW219714-1 | S2728 | EGFR              | WZ8040                           | 17 | 2  |
| SW199108-4 | S1025 | EGFR              | AG-1478                          |    |    |
| SW219863-1 | S7297 | EGFR              | (Tyrphostin AG-1478)             | 17 | 27 |
| SW219293-1 | S2205 | EGFR              | Gefitinib (ZD1839)               | 18 | 4  |
| SW219394-1 | S1170 | EGFR              | AZD9291                          | 18 | 9  |
| SW219476-1 | S7206 | EGFR              | OSI-420                          | 19 | 17 |
| SW218184-2 | S7039 | EGFR              | WZ3146                           | 25 | 15 |
| SW219523-1 | S8009 | EGFR              | CNX-2006                         | 25 | 9  |
| SW219267-1 | S1392 | EGFR              | PD168393                         | 27 | 5  |
| SW219698-1 | S2922 | EGFR              | AG-18                            | 28 | 10 |
| SW219372-1 | S2818 | HDAC              | Pelitinib (EKB-569)              | 30 | 2  |
| SW219374-1 | S7292 | HDAC              | Icotinib                         | 30 | 17 |
|            |       |                   | CI994                            |    |    |
|            |       |                   | (Tacedinaline)                   | 5  | 28 |
|            |       |                   | RG2833                           |    |    |
|            |       |                   | (RGFP109)                        | 5  | 28 |

|            |       |                    |                                              |    |    |
|------------|-------|--------------------|----------------------------------------------|----|----|
| SW219836-1 | S8001 | HDAC               | Rocilinostat (ACY-1215)                      | 5  | 15 |
| SW219287-2 | S8049 | HDAC               | Tubastatin A                                 | 7  | 30 |
| SW219287-1 | S2627 | HDAC               | Tubastatin A HCl                             | 8  | 28 |
| SW219401-1 | S7229 | HDAC               | RGFP966                                      | 8  | 5  |
| SW219449-1 | S7324 | HDAC               | TMP269                                       | 12 | 9  |
| SW219695-1 | S7595 | HDAC               | Santacruzamate A (CAY10683)                  | 12 | 20 |
| SW219169-2 | S1168 | HDAC               | Valproic acid sodium salt (Sodium valproate) | 15 | 22 |
| SW220150-1 | S2012 | HDAC               | PCI-34051                                    | 16 | 30 |
| SW219627-1 | S1422 | HDAC               | Droxinostat                                  | 18 | 29 |
| SW219738-1 | S1484 | HDAC               | MC1568                                       | 20 | 20 |
| SW199536-4 | S1047 | HDAC               | Vorinostat (SAHA; MK0683)                    | 22 | 15 |
| SW218130-2 | S1122 | HDAC               | Mocetinostat (MGCD0103)                      | 22 | 28 |
| SW218266-2 | S1090 | HDAC               | PCI-24781 (Abexinostat)                      | 22 | 15 |
| SW219369-1 | S1030 | HDAC               | Panobinostat (LBH589)                        | 22 | 15 |
| SW219379-1 | S2779 | HDAC               | M344                                         | 22 | 15 |
| SW219385-1 | S1095 | HDAC               | LAQ824 (Dacinostat)                          | 22 | 15 |
| SW219429-1 | S1515 | HDAC               | Pracinostat (SB939)                          | 22 | 15 |
| SW219445-1 | S1085 | HDAC               | Belinostat (PXD101)                          | 22 | 15 |
| SW219469-1 | S2170 | HDAC               | Givinostat (ITF2357)                         | 22 | 15 |
| SW219664-1 | S1045 | HDAC               | Trichostatin A (TSA)                         | 22 | 15 |
| SW219667-1 | S1053 | HDAC               | Entinostat (MS-275)                          | 22 | 9  |
| SW219675-1 | S2693 | HDAC               | Resminostat                                  | 22 | 15 |
| SW219772-1 | S2244 | HDAC               | AR-42                                        | 22 | 15 |
| SW219796-1 | S1096 | HDAC               | Quisinostat (JNJ-26481585)                   | 22 | 15 |
| SW219824-1 | S8043 | HDAC               | Scriptaid                                    | 22 | 15 |
| SW219934-1 | S1194 | HDAC               | CUDC-101                                     | 22 | 15 |
| SW220090-1 | S7473 | HDAC               | Nexturastat A                                | 22 | 9  |
| SW220304-1 | S3020 | HDAC               | Romidepsin (FK228; Depsipeptide)             | 22 | 5  |
| SW219199-1 | S4125 | HDAC               | Sodium Phenylbutyrate                        | 26 | 25 |
| SW219084-1 | S2239 | HDAC               | Tubacin                                      | 29 | 29 |
| SW196835-3 | S1847 | Histamine.Receptor | Clemastine Fumarate                          | 3  | 14 |
| SW197416-3 | S1358 | Histamine.Receptor | Loratadine                                   | 3  | 5  |
| SW196450-4 | S2044 | Histamine.Receptor | Cyproheptadine HCl                           | 5  | 4  |
| SW196380-2 | S1845 | Histamine.Receptor | Cimetidine                                   | 6  | 26 |
| SW196927-3 | S4139 | Histamine.Receptor | Cyclizine 2HCl                               | 7  | 20 |
| SW196969-3 | S3176 | Histamine.Receptor | Bethahistine 2HCl                            | 7  | 11 |

|            |       |                    |                                     |    |    |
|------------|-------|--------------------|-------------------------------------|----|----|
| SW197446-3 | S3146 | Histamine.Receptor | Tripelennamine<br>HCl               | 7  | 1  |
| SW199568-2 | S3208 | Histamine.Receptor | Fexofenadine HCl                    | 7  | 3  |
| SW219552-1 | S4118 | Histamine.Receptor | Histamine 2HCl                      | 7  | 30 |
| SW197471-3 | S2552 | Histamine.Receptor | Azelastine HCl                      | 8  | 24 |
| SW219888-1 | S3186 | Histamine.Receptor | Azatadine<br>dimaleate              | 12 | 26 |
| SW196707-3 | S1382 | Histamine.Receptor | Mianserin HCl                       | 14 | 27 |
| SW219889-1 | S3052 | Histamine.Receptor | Rupatadine<br>Fumarate              | 14 | 29 |
| SW196598-4 | S1357 | Histamine.Receptor | Lidocaine                           | 15 | 25 |
| SW196972-3 | S1291 | Histamine.Receptor | Cetirizine DiHCl                    | 15 | 22 |
| SW219424-1 | S2905 | Histamine.Receptor | JNJ-7777120                         | 15 | 22 |
| SW220161-1 | S3037 | Histamine.Receptor | Bepotastine<br>Besilate             | 15 | 26 |
| SW197397-2 | S2078 | Histamine.Receptor | Famotidine                          | 16 | 26 |
| SW197031-3 | S2585 | Histamine.Receptor | Brompheniramine<br>hydrogen maleate | 20 | 26 |
| SW197771-3 | S2494 | Histamine.Receptor | Olopatadine HCl                     | 20 | 25 |
| SW196372-4 | S1816 | Histamine.Receptor | Chlorpheniramine<br>Maleate         | 23 | 1  |
| SW196887-4 | S2024 | Histamine.Receptor | Ketotifen Fumarate                  | 23 | 11 |
| SW197026-2 | S2308 | Histamine.Receptor | Hesperetin                          | 23 | 11 |
| SW197646-3 | S1880 | Histamine.Receptor | Roxatidine Acetate<br>HCl           | 23 | 12 |
| SW219167-1 | S2813 | Histamine.Receptor | Ciproxifan                          | 23 | 12 |
| SW196800-3 | S1801 | Histamine.Receptor | Ranitidine                          | 26 | 13 |
| SW219837-1 | S4131 | Histamine.Receptor | Levodropropizine                    | 26 | 25 |
| SW196508-3 | S1890 | Histamine.Receptor | Nizatidine                          | 28 | 18 |
| SW196577-3 | S4026 | Histamine.Receptor | Hydroxyzine 2HCl                    | 28 | 16 |
| SW197234-3 | S4293 | Histamine.Receptor | Promethazine HCl                    | 28 | 5  |
| SW197792-3 | S4012 | Histamine.Receptor | Desloratadine                       | 28 | 3  |
| SW219521-1 | S3163 | Histamine.Receptor | Benztropine<br>mesylate             | 28 | 12 |
| SW219706-1 | S2065 | Histamine.Receptor | Lafutidine                          | 28 | 26 |
| SW219489-1 | S7122 | HSP                | XL888                               | 9  | 15 |
| SW220214-1 | S8039 | HSP                | PU-H71                              | 9  | 15 |
| SW219742-1 | S2639 | HSP                | SNX-2112 (PF-<br>04928473)          | 13 | 15 |
| SW219775-1 | S1052 | HSP                | Elesclomol (STA-<br>4783)           | 19 | 16 |
| SW218138-2 | S1163 | HSP                | AT13387                             | 30 | 15 |
| SW219302-1 | S1141 | HSP                | 17-AAG<br>(Tanespimycin)            | 30 | 15 |
| SW219303-1 | S1142 | HSP                | 17-DMAG<br>(Alvespimycin) HCl       | 30 | 19 |
| SW219319-1 | S1069 | HSP                | AUY922 (NVP-<br>AUY922)             | 30 | 15 |
| SW219510-1 | S2713 | HSP                | Geldanamycin                        | 30 | 15 |
| SW219606-1 | S2685 | HSP                | KW-2478                             | 30 | 15 |
| SW219719-1 | S7340 | HSP                | CH5138303                           | 30 | 15 |
| SW220092-1 | S7458 | HSP                | VER-49009                           | 30 | 19 |
| SW220107-1 | S7282 | HSP                | NMS-E973                            | 30 | 15 |
| SW220153-1 | S2656 | HSP                | PF-04929113<br>(SNX-5422)           | 30 | 15 |
| SW220170-1 | S7459 | HSP                | VER-50589                           | 30 | 15 |

|            |       |     |                                           |    |    |
|------------|-------|-----|-------------------------------------------|----|----|
| SW220175-1 | S7097 | HSP | HSP990 (NVP-<br>HSP990)                   | 30 | 15 |
| SW220186-1 | S1175 | HSP | BIIB021                                   | 30 | 15 |
| SW220253-1 | S1159 | HSP | Ganetespib (STA-<br>9090)                 | 30 | 15 |
| SW219203-1 | S8004 | JAK | ZM 39923 HCl                              | 7  | 19 |
| SW219757-1 | S7036 | JAK | XL019                                     | 8  | 6  |
| SW219153-1 | S2796 | JAK | WP1066                                    | 10 | 27 |
| SW219679-1 | S2219 | JAK | CYT387                                    | 10 | 19 |
| SW219864-1 | S8057 | JAK | Pacritinib (SB1518)                       | 10 | 21 |
| SW220119-1 | S1134 | JAK | AT9283                                    | 11 | 21 |
| SW220020-1 | S7605 | JAK | Filgotinib<br>(GLPG0634)                  | 15 | 28 |
| SW220096-1 | S2851 | JAK | Baricitinib<br>(LY3009104;<br>INCB028050) | 15 | 28 |
| SW220207-1 | S2902 | JAK | S-Ruxolitinib<br>(INCB018424)             | 15 | 8  |
| SW220133-2 | S2789 | JAK | Tofacitinib (CP-<br>690550;Tasocitinib)   | 16 | 1  |
| SW218187-2 | S2736 | JAK | TG101348<br>(SAR302503)                   | 17 | 6  |
| SW219632-1 | S2692 | JAK | TG101209                                  | 17 | 2  |
| SW219960-1 | S2179 | JAK | LY2784544                                 | 17 | 2  |
| SW219437-1 | S2686 | JAK | NVP-BSK805 2HCl                           | 18 | 2  |
| SW219486-1 | S2162 | JAK | AZD1480                                   | 19 | 2  |
| SW219623-1 | S2214 | JAK | AZ 960                                    | 19 | 27 |
| SW220243-1 | S2867 | JAK | WHI-P154                                  | 19 | 8  |
| SW219454-1 | S2806 | JAK | CEP-33779                                 | 25 | 5  |
| SW222338-1 | S1378 | JAK | Ruxolitinib<br>(INCB018424)               | 27 | 23 |
| SW220133-1 | S5001 | JAK | Tofacitinib (CP-<br>690550) Citrate       | 28 | 8  |
| SW202561-3 | S1008 | MEK | Selumetinib<br>(AZD6244)                  | 9  | 23 |
| SW218101-2 | S1036 | MEK | PD0325901                                 | 9  | 10 |
| SW219366-1 | S1102 | MEK | U0126-EtOH                                | 9  | 29 |
| SW219605-1 | S1568 | MEK | PD318088                                  | 9  | 2  |
| SW219691-1 | S1475 | MEK | Pimasertib (AS-<br>703026)                | 9  | 10 |
| SW219692-1 | S2134 | MEK | AZD8330                                   | 9  | 13 |
| SW219839-1 | S1066 | MEK | SL-327                                    | 9  | 14 |
| SW219910-1 | S7007 | MEK | MEK162 (ARRY-<br>162; ARRY-<br>438162)    | 9  | 29 |
| SW220152-1 | S2617 | MEK | TAK-733                                   | 9  | 13 |
| SW218089-2 | S2673 | MEK | Trametinib<br>(GSK1120212)                | 13 | 10 |
| SW218254-2 | S1177 | MEK | PD98059                                   | 13 | 10 |
| SW219634-1 | S1531 | MEK | BIX 02189                                 | 16 | 23 |
| SW197494-3 | S2310 | MEK | Honokiol                                  | 24 | 20 |
| SW219635-1 | S1530 | MEK | BIX 02188                                 | 28 | 12 |
| SW218136-2 | S1089 | MEK | Refametinib<br>(RDEA119; Bay<br>86-9766)  | 30 | 5  |

|            |       |                        |                                      |    |    |
|------------|-------|------------------------|--------------------------------------|----|----|
| SW219604-1 | S1020 | MEK                    | PD184352 (CI-1040)                   | 30 | 23 |
| SW219216-1 | S7493 | Microtubule.Associated | INH1                                 | 1  | 24 |
| SW219847-1 | S1148 | Microtubule.Associated | Docetaxel                            | 10 | 2  |
|            |       |                        | Epothilone B (EPO906; Patupilone)    | 10 | 2  |
| SW220268-1 | S1364 | Microtubule.Associated | ABT-751 (E7010)                      | 11 | 27 |
| SW219685-1 | S1165 | Microtubule.Associated | Epothilone A                         | 11 | 2  |
| SW220274-1 | S1297 | Microtubule.Associated | CW069                                | 15 | 30 |
| SW219359-1 | S7336 | Microtubule.Associated | Vinorelbine Tartrate                 | 18 | 2  |
| SW219257-1 | S4269 | Microtubule.Associated | INH6                                 | 19 | 24 |
| SW219306-1 | S7494 | Microtubule.Associated | Nocodazole                           | 21 | 27 |
| SW102861-5 | S2775 | Microtubule.Associated | Vincristine                          | 21 | 2  |
| SW219468-1 | S1241 | Microtubule.Associated | Vinblastine                          | 21 | 5  |
| SW219940-1 | S1248 | Microtubule.Associated | CYT997 (Lexibulin)                   | 21 | 5  |
| SW220198-1 | S2195 | Microtubule.Associated | Griseofulvin                         | 24 | 8  |
| SW219615-1 | S4071 | Microtubule.Associated | Paclitaxel                           | 29 | 2  |
| SW219830-1 | S1150 | Microtubule.Associated | Rapamycin (Sirolimus)                | 2  | 29 |
| SW219073-1 | S1039 | mTOR                   | Temsirolimus (CCI-779; NSC 683864)   | 2  | 29 |
| SW219138-1 | S1044 | mTOR                   | Everolimus (RAD001)                  | 2  | 23 |
| SW219218-1 | S1120 | mTOR                   | GDC-0980 (RG7422)                    | 2  | 9  |
| SW219472-1 | S2696 | mTOR                   | INK 128 (MLN0128)                    | 2  | 17 |
| SW220210-1 | S2811 | mTOR                   | PP242                                | 2  | 17 |
| SW220211-1 | S2218 | mTOR                   | Ridaforolimus (Deforolimus; MK-8669) | 2  | 16 |
| SW222224-1 | S1022 | mTOR                   | Palomid 529 (P529)                   | 10 | 2  |
| SW219676-1 | S2238 | mTOR                   | ETP-46464                            | 27 | 20 |
| SW219762-1 | S8050 | mTOR                   | CH5132799                            | 27 | 17 |
| SW220190-1 | S2699 | mTOR                   | OSI-027                              | 27 | 23 |
| SW220246-1 | S2624 | mTOR                   | Chrysophanic Acid                    | 28 | 12 |
| SW219732-1 | S2406 | mTOR                   | AZD8055                              | 29 | 20 |
| SW218287-2 | S1555 | mTOR                   | WYE-125132 (WYE-132)                 | 29 | 12 |
| SW219487-1 | S2661 | mTOR                   | WYE-354                              | 29 | 16 |
| SW219671-1 | S1266 | mTOR                   | AZD2014                              | 29 | 27 |
| SW219704-1 | S2783 | mTOR                   | WAY-600                              | 29 | 27 |
| SW219922-1 | S2689 | mTOR                   | KU-0063794                           | 29 | 3  |
| SW220188-1 | S1226 | mTOR                   | Zotarolimus(ABT-578)                 | 29 | 16 |
| SW222245-1 | S7091 | mTOR                   | Avasimibe                            | 2  | 4  |
| SW219628-1 | S2187 | P450                   | Ketoconazole                         | 3  | 29 |
| SW196888-4 | S1353 | P450                   | Pioglitazone HCl                     | 4  | 11 |
| SW197561-4 | S2046 | P450                   | Apigenin                             | 6  | 21 |
| SW196866-2 | S2262 | P450                   | Cobicistat (GS-9350)                 | 8  | 29 |
| SW219553-1 | S2900 | P450                   | TAK-700 (Orteronel)                  | 15 | 30 |
| SW219642-1 | S1195 | P450                   |                                      |    |    |



|            |       |      |                                    |    |    |
|------------|-------|------|------------------------------------|----|----|
| SW101224-2 | S2526 | P450 | Alizarin                           | 20 | 22 |
| SW197571-2 | S1442 | P450 | Voriconazole                       | 20 | 22 |
| SW219043-1 | S2555 | P450 | Clarithromycin                     | 20 | 11 |
| SW219329-1 | S2394 | P450 | Naringenin                         | 23 | 11 |
| SW219546-1 | S2921 | P450 | PF-4981517                         | 24 | 22 |
| SW219229-1 | S2268 | P450 | Baicalein                          | 27 | 10 |
| SW219192-1 | S4273 | PARP | 3-Aminobenzamide                   | 7  | 25 |
| SW219820-1 | S1004 | PARP | Veliparib (ABT-888)                | 7  | 14 |
| SW218142-2 | S1060 | PARP | Olaparib (AZD2281; Ku-0059436)     | 8  | 7  |
| SW219891-2 | S2886 | PARP | PJ34                               | 8  | 20 |
| SW219192-2 | S1132 | PARP | INO-1001                           | 12 | 12 |
| SW219655-1 | S7048 | PARP | BMN 673                            | 12 | 28 |
| SW218112-2 | S1087 | PARP | Iniparib (BSI-201)                 | 13 | 10 |
| SW219891-1 | S7300 | PARP | PJ34 HCl                           | 15 | 2  |
| SW219733-1 | S8038 | PARP | UPF 1069                           | 20 | 9  |
| SW219936-1 | S2178 | PARP | AG-14361                           | 21 | 28 |
| SW219802-1 | S7029 | PARP | AZD2461                            | 23 | 7  |
| SW219544-1 | S1098 | PARP | Rucaparib (AG-014699; PF-01367338) | 26 | 7  |
| SW220067-1 | S7438 | PARP | ME0328                             | 28 | 20 |
| SW197603-2 | S1512 | PDE  | Tadalafil                          | 1  | 22 |
| SW219717-1 | S1550 | PDE  | Pimobendan                         | 5  | 2  |
| SW219816-1 | S7224 | PDE  | Deltarasin                         | 10 | 20 |
| SW196433-3 | S2320 | PDE  | Luteolin                           | 11 | 8  |
| SW199053-2 | S1294 | PDE  | Cilostazol                         | 15 | 14 |
| SW222234-1 | S2687 | PDE  | PF-2545920                         | 18 | 28 |
| SW197648-2 | S3172 | PDE  | Anagrelide HCl                     | 20 | 9  |
| SW197737-2 | S2515 | PDE  | Vardenafil HCl Trihydrate          | 20 | 14 |
| SW199664-3 | S1431 | PDE  | Sildenafil Citrate                 | 20 | 14 |
| SW219217-1 | S4019 | PDE  | Avanafil                           | 20 | 16 |
| SW219244-1 | S2127 | PDE  | S- (+)-Rolipram                    | 20 | 17 |
| SW219280-1 | S1455 | PDE  | Cilomilast                         | 20 | 18 |
| SW197542-3 | S1929 | PDE  | Irsogladine                        | 23 | 3  |
| SW219125-1 | S2312 | PDE  | Icariin                            | 24 | 11 |
| SW196583-4 | S1430 | PDE  | Rolipram                           | 26 | 22 |
| SW196679-3 | S1504 | PDE  | Dyphylline                         | 26 | 8  |
| SW219741-1 | S2620 | PDE  | GSK256066                          | 26 | 24 |
| SW219856-1 | S8034 | PDE  | Apremilast (CC-10004)              | 26 | 22 |
| SW220196-1 | S2131 | PDE  | Roflumilast                        | 26 | 11 |
| SW199286-2 | S1673 | PDE  | Aminophylline                      | 28 | 23 |
| SW219311-1 | S2671 | PI3K | AS-252424                          | 1  | 20 |
| SW202556-4 | S1065 | PI3K | GDC-0941                           | 2  | 12 |
| SW218117-2 | S1038 | PI3K | PI-103                             | 2  | 12 |
| SW219415-1 | S1360 | PI3K | GSK1059615                         | 2  | 27 |
| SW219812-1 | S1118 | PI3K | XL147                              | 2  | 19 |
| SW220128-1 | S2814 | PI3K | BYL719                             | 2  | 6  |
| SW220216-1 | S2767 | PI3K | 3-Methyladenine                    | 5  | 26 |
| SW219482-1 | S7018 | PI3K | CZC24832                           | 7  | 18 |
| SW219650-1 | S8002 | PI3K | GSK2636771                         | 8  | 30 |

|            |       |            |                                                  |    |    |
|------------|-------|------------|--------------------------------------------------|----|----|
| SW219158-1 | S2749 | PI3K       | BGT226 (NVP-<br>BGT226)                          | 10 | 27 |
| SW219506-1 | S1205 | PI3K       | PIK-75                                           | 11 | 28 |
| SW113275-2 | S2682 | PI3K       | CAY10505                                         | 12 | 13 |
| SW219297-1 | S1352 | PI3K       | TG100-115                                        | 12 | 1  |
| SW219823-1 | S2226 | PI3K       | CAL-101 (Idelalisib;<br>GS-1101)                 | 12 | 18 |
| SW219919-1 | S2681 | PI3K       | AS-604850                                        | 12 | 10 |
| SW220182-1 | S1072 | PI3K       | ZSTK474                                          | 13 | 4  |
| SW220212-1 | S2227 | PI3K       | PIK-294                                          | 13 | 4  |
| SW217688-2 | S1105 | PI3K       | LY294002                                         | 14 | 30 |
| SW218196-2 | S2636 | PI3K       | A66                                              | 14 | 3  |
| SW218249-2 | S1169 | PI3K       | TGX-221                                          | 14 | 16 |
| SW219525-1 | S2870 | PI3K       | TG100713                                         | 14 | 9  |
| SW219822-1 | S7028 | PI3K       | IPI-145 (INK1197)<br>GSK2126458                  | 14 | 17 |
| SW219502-1 | S2658 | PI3K       | (GSK458)                                         | 17 | 21 |
| SW219871-1 | S2759 | PI3K       | CUDC-907                                         | 17 | 20 |
| SW218129-2 | S1219 | PI3K       | YM201636                                         | 18 | 27 |
| SW219556-1 | S2207 | PI3K       | PIK-293                                          | 24 | 22 |
| SW219873-1 | S7356 | PI3K       | HS-173                                           | 25 | 27 |
| SW219187-1 | S1462 | PI3K       | AZD6482                                          | 27 | 3  |
| SW219245-1 | S1489 | PI3K       | PIK-93                                           | 27 | 5  |
| SW220201-1 | S7016 | PI3K       | VS-5584 (SB2343)<br>SAR245409                    | 27 | 7  |
| SW218114-2 | S1523 | PI3K       | (XL765)<br>BKM120 (NVP-<br>BKM120;               | 28 | 20 |
| SW218149-2 | S2247 | PI3K       | Buparlisib)                                      | 29 | 27 |
| SW219545-1 | S2758 | PI3K       | Wortmannin<br>Nafamostat                         | 29 | 4  |
| SW219392-1 | S1386 | Proteasome | Mesylate                                         | 12 | 12 |
| SW219683-1 | S7462 | Proteasome | PI-1840                                          | 12 | 9  |
| SW199665-2 | S3017 | Proteasome | Aspirin                                          | 15 | 26 |
| SW208077-3 | S1013 | Proteasome | Bortezomib (PS-<br>341)                          | 17 | 19 |
| SW218090-2 | S2853 | Proteasome | Carfilzomib (PR-<br>171)<br>CEP-18770            | 17 | 19 |
| SW219161-1 | S1157 | Proteasome | (Delanzomib)                                     | 17 | 19 |
| SW219743-1 | S2180 | Proteasome | MLN2238                                          | 17 | 19 |
| SW219744-1 | S2181 | Proteasome | MLN9708                                          | 17 | 19 |
| SW219780-1 | S2619 | Proteasome | MG-132                                           | 17 | 19 |
| SW220115-1 | S7172 | Proteasome | ONX-0914 (PR-<br>957)<br>Oprozomib (ONX<br>0912) | 17 | 19 |
| SW220116-1 | S7049 | Proteasome | 0912)                                            | 17 | 19 |
| SW197284-3 | S2101 | Proteasome | Gabexate Mesylate                                | 28 | 25 |
| SW219493-1 | S3046 | RAAS       | Azilsartan                                       | 1  | 12 |
| SW219848-1 | S1793 | RAAS       | Ramipril                                         | 1  | 1  |
| SW220041-1 | S2037 | RAAS       | Candesartan                                      |    |    |
| SW197658-2 | S1894 | RAAS       | Cilexetil                                        | 4  | 4  |
| SW197676-3 | S1738 | RAAS       | Valsartan                                        | 6  | 28 |
| SW199393-2 | S2581 | RAAS       | Telmisartan                                      | 6  | 26 |
| SW220093-1 | S2109 | RAAS       | Quinapril HCl                                    | 7  | 12 |
|            |       |            | Imidapril HCl                                    | 7  | 26 |

|            |       |                       |                                                    |    |    |
|------------|-------|-----------------------|----------------------------------------------------|----|----|
| SW222231-1 | S2199 | RAAS                  | Aliskiren<br>Hemifumarate                          | 7  | 22 |
| SW197672-2 | S1657 | RAAS                  | Enalaprilat<br>Dihydrate                           | 13 | 22 |
| SW220029-1 | S2664 | RAAS                  | Clinofibrate<br>Losartan<br>Potassium (DuP<br>753) | 19 | 11 |
| SW199641-2 | S1359 | RAAS                  | Olmesartan<br>Medoxomil                            | 20 | 26 |
| SW199650-2 | S1604 | RAAS                  | Moexipril HCl                                      | 23 | 11 |
| SW219263-1 | S2079 | RAAS                  | PD123319                                           | 23 | 26 |
| SW220127-1 | S7098 | RAAS                  | Benazepril HCl                                     | 23 | 1  |
| SW197591-3 | S1284 | RAAS                  | Enalapril Maleate                                  | 24 | 22 |
| SW198780-2 | S1941 | RAAS                  | Candesartan                                        | 28 | 26 |
| SW199612-2 | S1578 | RAAS                  | Captopril                                          | 28 | 11 |
| SW219164-1 | S2051 | RAAS                  | Cilazapril<br>Monohydrate                          | 28 | 11 |
| SW219383-1 | S2081 | RAAS                  | Temocapril HCl                                     | 28 | 26 |
| SW219451-1 | S2099 | RAAS                  | Azilsartan<br>Medoxomil                            | 28 | 18 |
| SW219494-1 | S3057 | RAAS                  | GW5074                                             | 28 | 3  |
| SW212797-2 | S2872 | RAF                   | ZM 336372                                          | 6  | 3  |
| SW218185-2 | S2720 | RAF                   | GDC-0879                                           | 6  | 12 |
| SW219204-1 | S1104 | RAF                   | AZ 628                                             | 9  | 18 |
| SW219448-1 | S2746 | RAF                   | Dabrafenib<br>(GSK2118436)                         | 9  | 21 |
| SW219503-1 | S2807 | RAF                   | TAK-632                                            | 9  | 7  |
| SW219895-1 | S7291 | RAF                   | LGX818                                             | 9  | 4  |
| SW220064-1 | S7108 | RAF                   | Sorafenib Tosylate                                 | 9  | 7  |
| SW202562-3 | S1040 | RAF                   | Sorafenib                                          | 10 | 29 |
| SW202562-4 | S7397 | RAF                   | RAF265 (CHIR-<br>265)                              | 10 | 16 |
| SW219923-1 | S2161 | RAF                   | Vemurafenib<br>(PLX4032;<br>RG7204)                | 11 | 4  |
| SW218095-2 | S1267 | RAF                   | PLX-4720                                           | 27 | 24 |
| SW218119-2 | S1152 | RAF                   | SB590885                                           | 29 | 9  |
| SW220229-1 | S2220 | RAF                   | Stavudine (d4T)                                    | 30 | 12 |
| SW220279-1 | S1398 | Reverse.Transcriptase | Dapivirine<br>(TMC120)                             | 1  | 2  |
| SW220193-1 | S2914 | Reverse.Transcriptase | Zidovudine                                         | 2  | 13 |
| SW198799-2 | S2579 | Reverse.Transcriptase | Rilpivirine                                        | 7  | 9  |
| SW220232-1 | S7303 | Reverse.Transcriptase | Adefovir Dipivoxil                                 | 10 | 19 |
| SW219933-1 | S1718 | Reverse.Transcriptase | Tenofovir<br>Disoproxil<br>Fumarate                | 13 | 7  |
| SW220151-1 | S1400 | Reverse.Transcriptase | Zalcitabine                                        | 16 | 26 |
| SW197364-4 | S1719 | Reverse.Transcriptase | Lamivudine                                         | 23 | 26 |
| SW197614-3 | S1706 | Reverse.Transcriptase | Emtricitabine                                      | 23 | 14 |
| SW220172-1 | S1704 | Reverse.Transcriptase | Etravirine<br>(TMC125)                             | 23 | 7  |
| SW219570-1 | S3080 | Reverse.Transcriptase | Nevirapine                                         | 27 | 26 |
| SW197569-2 | S1742 | Reverse.Transcriptase | Didanosine                                         | 28 | 8  |
| SW198619-2 | S1702 | Reverse.Transcriptase | Ouabain                                            | 28 | 21 |
| SW219101-1 | S4016 | Sodium.Channel        | Digoxin                                            | 2  | 21 |
| SW219113-1 | S4290 | Sodium.Channel        |                                                    | 2  | 21 |

|            |       |                |                                   |    |    |
|------------|-------|----------------|-----------------------------------|----|----|
| SW196688-3 | S4080 | Sodium.Channel | Triamterene                       | 7  | 20 |
| SW220143-1 | S2524 | Sodium.Channel | Phenytoin sodium                  | 7  | 11 |
| SW196719-3 | S4023 | Sodium.Channel | Procaine HCl                      | 12 | 30 |
| SW219770-1 | S1256 | Sodium.Channel | Rufinamide                        | 15 | 11 |
| SW220114-1 | S2118 | Sodium.Channel | Ibutilide Fumarate                | 15 | 14 |
|            |       |                | Amiloride hydrochloride dihydrate | 20 | 11 |
| SW196333-5 | S2560 | Sodium.Channel | Oxcarbazepine                     | 20 | 14 |
| SW197468-3 | S1391 | Sodium.Channel |                                   |    |    |
| SW203757-2 | S2525 | Sodium.Channel | Phenytoin                         | 20 | 1  |
| SW197486-3 | S3024 | Sodium.Channel | Lamotrigine                       | 21 | 30 |
| SW196805-4 | S1614 | Sodium.Channel | Riluzole                          | 23 | 9  |
| SW196878-3 | S4294 | Sodium.Channel | Procainamide HCl                  | 23 | 23 |
| SW197338-3 | S1828 | Sodium.Channel | Proparacaine HCl                  | 23 | 22 |
| SW220141-1 | S1693 | Sodium.Channel | Carbamazepine                     | 23 | 11 |
| SW196964-3 | S2500 | Sodium.Channel | Propafenone HCl                   | 24 | 24 |
| SW198832-2 | S3064 | Sodium.Channel | Ambroxol HCl                      | 24 | 14 |
| SW196475-3 | S4038 | Sodium.Channel | Dibucaine HCl                     | 28 | 12 |
| SW220277-1 | S2785 | Sodium.Channel | A-803467 Voreloxin (SNS-595)      | 28 | 4  |
| SW219924-1 | S7518 | Topoisomerase  | Genistein                         | 4  | 19 |
| SW203763-2 | S1342 | Topoisomerase  | Camptothecin                      | 6  | 28 |
| SW196414-3 | S1288 | Topoisomerase  | Mitoxantrone                      | 10 | 19 |
| SW196745-6 | S1889 | Topoisomerase  | Pirarubicin                       | 10 | 9  |
| SW219079-1 | S1393 | Topoisomerase  | Beta-Lapachone                    | 10 | 19 |
| SW219806-1 | S7261 | Topoisomerase  | Idarubicin HCl                    | 10 | 27 |
| SW219421-1 | S1228 | Topoisomerase  | Doxorubicin (Adriamycin)          | 11 | 4  |
| SW219441-1 | S1208 | Topoisomerase  | Epirubicin HCl                    | 11 | 20 |
| SW219442-1 | S1223 | Topoisomerase  | Moxifloxacin HCl                  | 11 | 9  |
| SW197554-3 | S1465 | Topoisomerase  | Etoposide                         | 13 | 26 |
| SW219048-1 | S1225 | Topoisomerase  | Irinotecan                        | 13 | 19 |
| SW220163-1 | S1198 | Topoisomerase  | Flumequine                        | 13 | 19 |
| SW196774-3 | S3181 | Topoisomerase  | Pefloxacin                        | 15 | 11 |
| SW197608-4 | S4119 | Topoisomerase  | Mesylate Dihydrate                | 16 | 26 |
|            |       |                | Irinotecan HCl Trihydrate         | 16 | 28 |
| SW197790-4 | S2217 | Topoisomerase  | Betulinic acid                    | 16 | 28 |
| SW219056-1 | S3603 | Topoisomerase  | Topotecan HCl                     | 18 | 30 |
| SW197557-5 | S1231 | Topoisomerase  | SN-38                             | 19 | 19 |
| SW219948-1 | S4908 | Topoisomerase  | 10-Hydroxycamptothecin            | 19 | 28 |
| SW220315-1 | S2423 | Topoisomerase  |                                   | 19 | 19 |

|            |       |                 |                                 |    |    |
|------------|-------|-----------------|---------------------------------|----|----|
| SW219946-1 | S1367 | Topoisomerase   | Amonafide                       | 27 | 19 |
| SW219896-1 | S1084 | VEGFR           | Brivanib (BMS-540215)           | 1  | 17 |
| SW218092-2 | S1046 | VEGFR           | Vandetanib (ZD6474)             | 3  | 2  |
| SW218116-2 | S1003 | VEGFR           | Linifanib (ABT-869)             | 10 | 19 |
| SW220084-1 | S7258 | VEGFR           | SKLB1002                        | 12 | 20 |
| SW219259-1 | S1164 | VEGFR           | Lenvatinib (E7080)              | 13 | 23 |
| SW219897-1 | S1138 | VEGFR           | Brivanib Alaninate (BMS-582664) | 13 | 1  |
| SW198937-2 | S1101 | VEGFR           | Vatalanib (PTK787) 2HCl         | 15 | 29 |
| SW218301-2 | S1010 | VEGFR           | Nintedanib (BIBF 1120)          | 18 | 8  |
| SW219500-1 | S2896 | VEGFR           | ZM 323881 HCl                   | 19 | 4  |
| SW219791-1 | S2845 | VEGFR           | Semaxanib (SU5416)              | 19 | 8  |
| SW218300-2 | S1032 | VEGFR           | Motesanib Diphosphate (AMG-706) | 22 | 8  |
| SW220296-1 | S2221 | VEGFR           | Apatinib                        | 24 | 4  |
| SW219944-1 | S2842 | VEGFR           | SAR131675                       | 26 | 17 |
| SW219943-1 | S2897 | VEGFR           | ZM 306416                       | 27 | 17 |
| SW219464-1 | S1005 | VEGFR.KIT.PDGFR | Axitinib                        | 1  | 21 |
| SW218156-2 | S1363 | VEGFR.KIT.PDGFR | Ki8751                          | 5  | 21 |
| SW218097-2 | S1178 | VEGFR.KIT.PDGFR | Regorafenib (BAY 73-4506)       | 11 | 29 |
| SW218082-2 | S1035 | VEGFR.KIT.PDGFR | Pazopanib HCl (GW786034 HCl)    | 13 | 28 |
| SW219261-1 | S1017 | VEGFR.KIT.PDGFR | Cediranib (AZD2171)             | 18 | 18 |
| SW219787-1 | S1018 | VEGFR.KIT.PDGFR | Dovitinib (TKI-258; CHIR-258)   | 18 | 6  |
| SW218082-3 | S3012 | VEGFR.KIT.PDGFR | Pazopanib                       | 19 | 28 |
| SW219794-1 | S1220 | VEGFR.KIT.PDGFR | OSI-930                         | 19 | 4  |
| SW219407-1 | S1042 | VEGFR.KIT.PDGFR | Sunitinib Malate                | 25 | 2  |
| SW219787-2 | S2769 | VEGFR.KIT.PDGFR | Dovitinib (TKI-258)             | 25 | 21 |
| SW219262-1 | S1557 | VEGFR.KIT.PDGFR | Dilactic Acid                   | 28 | 8  |
| SW220176-1 | S2231 | VEGFR.KIT.PDGFR | KRN 633                         | 28 | 8  |
| SW219364-1 | S1207 | VEGFR.KIT.PDGFR | Telatinib                       | 29 | 5  |
|            |       |                 | Tivozanib (AV-951)              | 30 | 17 |

**Supplementary Table 3: SNF-Euclidean APC hypergeometric test p-values.**

Hypergeometric test p-values for Selleck target classes in SNF-Euclidean APC clusters.  
Bonferroni-corrected alpha = 0.0006

| <b>Class</b>            | <b>Cluster Number</b> | <b>-log<sub>10</sub> p-value</b> | <b>Significant?</b> |
|-------------------------|-----------------------|----------------------------------|---------------------|
| P450                    | 1                     | 4.25605576                       | TRUE                |
| ATM.ATR                 | 1                     | 5.04517835                       | TRUE                |
| Hist.Receptor           | 4                     | 2.2897748                        | FALSE               |
| COX                     | 6                     | 1.91982167                       | FALSE               |
| RAAS                    | 6                     | 2.13377808                       | FALSE               |
| Hist.Receptor           | 6                     | 3.43010914                       | TRUE                |
| AdrR.agonist            | 6                     | 4.02855491                       | TRUE                |
| Hist.Receptor           | 9                     | 1.95941317                       | FALSE               |
| Hist.Receptor           | 10                    | 1.75917031                       | FALSE               |
| RAAS                    | 10                    | 3.45658465                       | TRUE                |
| Reverse.Transcriptase   | 10                    | 4.49051096                       | TRUE                |
| Hist.Receptor           | 13                    | 2.69927303                       | FALSE               |
| AChR.antagonist         | 13                    | 3.0056789                        | FALSE               |
| PDE                     | 14                    | 2.68768419                       | FALSE               |
| K.Channel               | 14                    | 3.62607173                       | TRUE                |
| Adr.Receptor.antagonist | 15                    | 2.5148078                        | FALSE               |
| PI3K                    | 17                    | 3.14300227                       | FALSE               |
| COX                     | 19                    | 3.3097259                        | TRUE                |
| HDAC                    | 20                    | 1.79545626                       | FALSE               |
| K.Channel               | 20                    | 3.29865781                       | TRUE                |
| DNA.RNA.Synthesis       | 25                    | 6.20147175                       | TRUE                |
| AChR.antagonist         | 26                    | 2.84683694                       | FALSE               |
| RAAS                    | 26                    | 3.21292655                       | FALSE               |
| COX                     | 26                    | 4.02855491                       | TRUE                |
| PI3K                    | 27                    | 3.05651353                       | FALSE               |
| JAK                     | 39                    | 3.71566364                       | TRUE                |
| CDK                     | 42                    | 8.86025664                       | TRUE                |
| PDE                     | 43                    | 3.48380466                       | TRUE                |
| DNA.RNA.Synthesis       | 45                    | 3.1743779                        | FALSE               |
| Aurora.Kinase           | 45                    | 3.63343507                       | TRUE                |
| Reverse.Transcriptase   | 45                    | 4.11305913                       | TRUE                |
| VEGFR.KIT.PDGFR         | 45                    | 5.79439169                       | TRUE                |
| MEK                     | 46                    | 4.4173404                        | TRUE                |
| RAF                     | 48                    | 5.61784122                       | TRUE                |
| HSP                     | 48                    | 15.6575773                       | TRUE                |

|                              |     |            |       |
|------------------------------|-----|------------|-------|
| PLK                          | 49  | 4.77132139 | TRUE  |
| HDAC                         | 49  | 15.6575773 | TRUE  |
| Hist.Receptor                | 64  | 2.05864879 | FALSE |
| AChR.antagonist              | 64  | 2.35315313 | FALSE |
| Adr.Receptor.agonist         | 64  | 2.40247918 | FALSE |
| COX                          | 64  | 2.40247918 | FALSE |
| Dopamine.Receptor.antagonist | 65  | 4.92012054 | TRUE  |
| Topoisomerase                | 66  | 3.41531571 | TRUE  |
| PI3K                         | 67  | 2.13035048 | FALSE |
| Topoisomerase                | 67  | 2.7625374  | FALSE |
| Bcl-2                        | 67  | 4.0269807  | TRUE  |
| Hist.Receptor                | 68  | 1.95941317 | FALSE |
| COX                          | 68  | 2.30034797 | FALSE |
| VEGFR                        | 71  | 4.97183704 | TRUE  |
| HMG-CoA.Reductase            | 73  | 5.67048662 | TRUE  |
| Src                          | 74  | 6.64992842 | TRUE  |
| Epigenetic.Reader.Domain     | 76  | 14.3111371 | TRUE  |
| Hist.Receptor                | 77  | 2.13035048 | FALSE |
| Adr.Receptor.antagonist      | 77  | 2.4761153  | FALSE |
| AChR.antagonist              | 80  | 2.88696492 | FALSE |
| Hist.Receptor                | 81  | 2.42654657 | FALSE |
| ER.PR_antagonist             | 81  | 4.78604926 | TRUE  |
| RAF                          | 82  | 5.49803799 | TRUE  |
| MEK                          | 82  | 7.51565297 | TRUE  |
| HDAC                         | 83  | 9.41983968 | TRUE  |
| AChR.antagonist              | 86  | 2.21944195 | FALSE |
| Adr.Receptor.antagonist      | 86  | 2.26828361 | FALSE |
| 5HTR.agonist                 | 86  | 4.58709819 | TRUE  |
| p38.MAPK                     | 87  | 4.82954492 | TRUE  |
| STAT                         | 88  | 4.17883559 | TRUE  |
| ABL                          | 88  | 4.8251888  | TRUE  |
| Topoisomerase                | 88  | 5.04851238 | TRUE  |
| RAF                          | 90  | 4.14395889 | TRUE  |
| ATPase                       | 90  | 6.73816904 | TRUE  |
| ABL                          | 91  | 4.37914804 | TRUE  |
| Adr.Receptor.antagonist      | 93  | 3.50631673 | TRUE  |
| ER.PR_agonist                | 97  | 4.67738131 | TRUE  |
| EGFR.ERBB                    | 98  | 4.44183346 | TRUE  |
| DNA.RNA.Synthesis            | 99  | 3.4727626  | TRUE  |
| PI3K                         | 100 | 3.20179911 | FALSE |
| Wnt.beta-catenin             | 100 | 3.70337698 | TRUE  |

|                           |     |            |       |
|---------------------------|-----|------------|-------|
| IGFR                      | 100 | 3.85458471 | TRUE  |
| Ca.Channel                | 100 | 4.37616146 | TRUE  |
| mTOR                      | 100 | 14.7784985 | TRUE  |
| Microtubule.Associated    | 101 | 7.23326999 | TRUE  |
| MEK                       | 102 | 9.30487308 | TRUE  |
| Topoisomerase             | 103 | 2.97361122 | FALSE |
| Sodium.Channel            | 103 | 3.04111994 | FALSE |
| IkB.IKK                   | 103 | 4.24542125 | TRUE  |
| JAK                       | 103 | 4.3690592  | TRUE  |
| CDK                       | 103 | 5.68016436 | TRUE  |
| Proteasome                | 103 | 15.9545898 | TRUE  |
| MET                       | 105 | 4.9666167  | TRUE  |
| PDGFR                     | 105 | 5.29514851 | TRUE  |
| PARP                      | 106 | 4.70583723 | TRUE  |
| PDE                       | 107 | 2.84249965 | FALSE |
| Histone.Methyltransferase | 108 | 4.59476586 | TRUE  |
| Aurora.Kinase             | 109 | 5.95513653 | TRUE  |
| p38.MAPK                  | 110 | 5.06645713 | TRUE  |
| JAK                       | 111 | 3.48380466 | TRUE  |
| EGFR                      | 111 | 3.87285091 | TRUE  |
| MET.VEGFR                 | 111 | 5.21210644 | TRUE  |
| ABL                       | 111 | 6.22196478 | TRUE  |
| DNA.RNA.Synthesis         | 115 | 4.31493643 | TRUE  |
| RAAS                      | 117 | 2.86452526 | FALSE |
| Sodium.Channel            | 117 | 2.99566445 | FALSE |
| DNA.RNA.Synthesis         | 117 | 3.9787859  | TRUE  |
| Kinesin                   | 118 | 6.76986956 | TRUE  |
| Topoisomerase             | 119 | 5.95198865 | TRUE  |
| PLK                       | 122 | 4.83449691 | TRUE  |
| STAT                      | 122 | 5.0753188  | TRUE  |
| Microtubule.Associated    | 122 | 9.48944986 | TRUE  |
| EGFR                      | 123 | 4.39394247 | TRUE  |
| PI3K                      | 123 | 4.88317226 | TRUE  |
| mTOR                      | 123 | 10.0294242 | TRUE  |
| RAAS                      | 124 | 2.77899116 | FALSE |
| 5HTR.antagonist           | 124 | 2.84249965 | FALSE |
| 5HTR.antagonist           | 127 | 2.48838075 | FALSE |
| Adr.Receptor.agonist      | 127 | 3.3097259  | TRUE  |
| GluR.antagonist           | 127 | 5.7801431  | TRUE  |

---



**Supplementary Table 4: Target class enrichment in APC clusters.** APC clusters that are enriched with a single class from the Selleck library and the NPFs that are associated with those clusters.

| <b>Class</b>             | <b>Cluster number</b> | <b>Number of NPFs</b> | <b>NPF IDs</b>            |
|--------------------------|-----------------------|-----------------------|---------------------------|
| HSP                      | 48                    | 0                     |                           |
| HDAC                     | 49                    | 3                     | SW218953 through SW218955 |
| Epigenetic.Reader.Domain | 76                    | 0                     |                           |
| mTOR                     | 100                   | 1                     | SW218859                  |
| Proteasome               | 103                   | 1                     | SW218864                  |
| mTOR                     | 123                   | 0                     |                           |

**Supplementary Table 5: Cluster #49 members.** NPFs and Selleck compounds that are present in the APC cluster #49, which is enriched in HDAC inhibitors.

| <b>Name</b> | <b>Class</b> | <b>Compound</b>            | <b>MW</b> |
|-------------|--------------|----------------------------|-----------|
| SW218140-2  | PLK          | Volasertib (BI 6727)       | 618.81    |
| SW218130-2  | HDAC         | Mocetinostat (MGCD0103)    | 396.44    |
| SW199536-4  | HDAC         | Vorinostat (SAHA, MK0683)  | 264.3     |
| SW218954-1  | NPF          | RLUS-2173D                 | NA        |
| SW218953-1  | NPF          | RLUS-2173C                 | NA        |
| SW218266-2  | HDAC         | PCI-24781 (Abexinostat)    | 397.42    |
| SW218187-2  | JAK          | TG101348 (SAR302503)       | 524.68    |
| SW219379-1  | HDAC         | M344                       | 307.39    |
| SW219369-1  | HDAC         | Panobinostat (LBH589)      | 349.43    |
| SW219316-1  | PLK          | Ro3280                     | 543.61    |
| SW218955-1  | NPF          | RLUS-2173E                 | NA        |
| SW219469-1  | HDAC         | Givinostat (ITF2357)       | 475.97    |
| SW219445-1  | HDAC         | Belinostat (PXD101)        | 318.35    |
| SW219429-1  | HDAC         | Pracinostat (SB939)        | 358.48    |
| SW219385-1  | HDAC         | LAQ824 (Dacinostat)        | 379.46    |
| SW219796-1  | HDAC         | Quisinostat (JNJ-26481585) | 394.48    |
| SW219772-1  | HDAC         | AR-42                      | 312.36    |
| SW219675-1  | HDAC         | Resminostat                | 349.4     |
| SW219664-1  | HDAC         | Trichostatin A (TSA)       | 302.4     |
| SW220090-1  | HDAC         | Nexturastat A              | 341.4     |
| SW219934-1  | HDAC         | CUDC-101                   | 434.49    |
| SW219824-1  | HDAC         | Scriptaid                  | 326.35    |

**Supplementary Table 6: Differential expression of top 20 genes in the Nanostring metabolism panel.**

Differential expression is shown as log2 fold change. P-values are Benjamini-Yekutieli adjusted. \*Rawdata-Nanostringmetabolismpanel included as separate attachment.

|             | Differential Expression-- Top20 |           |            |            |             |            |            |          |            |           |                                                                  |                     |
|-------------|---------------------------------|-----------|------------|------------|-------------|------------|------------|----------|------------|-----------|------------------------------------------------------------------|---------------------|
|             | log2 fold                       | std error | lower corf | Upper corf | Linear fold | lower corf | Upper corf | P-value  | BY-p-value | method    | Gene:sets                                                        | probe ID            |
| THBS1-mRNA  | -0.248                          | 0.0123    | -0.272     | -0.224     | 0.842       | 0.828      | 0.856      | 3.76E-08 | 0.000132   | loglinear | Myc, PI3K                                                        | NM_003246.2:3465    |
| CD63-mRNA   | -0.124                          | 0.016     | -0.155     | -0.0921    | 0.918       | 0.898      | 0.938      | 5.72E-05 | 0.0663     | loglinear | Lysosomal Degradation                                            | NM_001780.4:350     |
| SCD-mRNA    | 0.212                           | 0.0276    | 0.158      | 0.266      | 1.16        | 1.12       | 1.2        | 5.83E-05 | 0.0663     | loglinear | AMPK, Fatty Acid Synthesis                                       | NM_005063.4:2025    |
| PRKAG2-mRNA | -0.125                          | 0.0168    | -0.138     | -0.0917    | 0.917       | 0.897      | 0.938      | 7.55E-05 | 0.0663     | loglinear | AMPK, Autophagy, Fatty Acid Oxidation, Mitochondrial Respiration | NM_016203.3:1895    |
| SOSTM1-mRNA | -0.0961                         | 0.0144    | -0.124     | -0.0679    | 0.936       | 0.917      | 0.954      | 0.000155 | 0.103      | loglinear | Cytokine & Chemokine Signaling                                   | NM_003900.3:1445    |
| CCND1-mRNA  | -0.135                          | 0.0206    | -0.175     | -0.0947    | 0.911       | 0.886      | 0.936      | 0.000177 | 0.103      | loglinear | AMPK, Cell Cycle, Cytokine & Chemokine Signaling                 | NM_053056.2:690     |
| HMOX1-mRNA  | -0.363                          | 0.0572    | -0.475     | -0.251     | 0.777       | 0.719      | 0.84       | 0.000222 | 0.111      | loglinear | Cytokine & Chemokine Signaling, KEAP1/NRF2 Pathway               | NM_001233.2:781     |
| GABDH-mRNA  | -0.0641                         | 0.0108    | -0.0853    | -0.043     | 0.957       | 0.943      | 0.971      | 0.000344 | 0.151      | loglinear | Glycolysis                                                       | NM_001256799.1:386  |
| CTPS1-mRNA  | -0.141                          | 0.0261    | -0.197     | -0.0901    | 0.907       | 0.875      | 0.953      | 0.00132  | 0.247      | loglinear | Nucleotide Synthesis                                             | NM_001301237.1:580  |
| MVC-mRNA    | -0.117                          | 0.0242    | -0.164     | -0.0692    | 0.922       | 0.892      | 0.939      | 0.000633 | 0.464      | loglinear | Cell Cycle, Cytokine & Chemokine Signaling, MAPK                 | NM_002467.3:1610    |
| CAD-mRNA    | -0.135                          | 0.0292    | -0.193     | -0.078     | 0.911       | 0.875      | 0.947      | 0.00169  | 0.499      | loglinear | Amino Acid Synthesis, Myc, Nucleotide Synthesis                  | NM_004341.3:2380    |
| ASNS-mRNA   | -0.159                          | 0.0345    | -0.226     | -0.091     | 0.896       | 0.855      | 0.939      | 0.00177  | 0.499      | loglinear | Amino Acid Synthesis, Glutamine Metabolism                       | NM_183356.2:1644    |
| ZNF43-mRNA  | -0.235                          | 0.0516    | -0.336     | -0.133     | 0.85        | 0.792      | 0.912      | 0.00189  | 0.499      | loglinear | Transcriptional Regulation                                       | NM_003423.2:3835    |
| NTSE-mRNA   | -0.134                          | 0.0305    | -0.194     | -0.0743    | 0.911       | 0.874      | 0.95       | 0.00231  | 0.499      | loglinear | Nucleotide Synthesis, Vitamin & Cofactor Metab                   | NM_002526.2:1214    |
| ALDOA-mRNA  | -0.0631                         | 0.0145    | -0.0915    | -0.0347    | 0.957       | 0.939      | 0.976      | 0.00241  | 0.499      | loglinear | Glycolysis, Pentose Phosphate Pathway                            | NM_184041.2:1455    |
| TXNRD1-mRNA | -0.102                          | 0.0236    | -0.148     | -0.0561    | 0.932       | 0.902      | 0.962      | 0.00247  | 0.499      | loglinear | p53 Pathway                                                      | NM_001093771.1:1009 |
| RPLP0-mRNA  | -0.0481                         | 0.0111    | -0.0699    | -0.0263    | 0.967       | 0.953      | 0.982      | 0.00251  | 0.499      | loglinear | Cytokine & Chemokine Signaling                                   | NM_001002.3:250     |
| COX41-mRNA  | -0.0529                         | 0.0125    | -0.0774    | -0.0285    | 0.964       | 0.948      | 0.98       | 0.00282  | 0.499      | loglinear | Mitochondrial Respiration, p53 Pathway                           | NM_001318797.1:50   |
| WDR45-mRNA  | -0.2                            | 0.0473    | -0.293     | -0.108     | 0.87        | 0.816      | 0.928      | 0.00283  | 0.499      | loglinear | Autophagy                                                        | NM_007075.3:1390    |
| ATF4-mRNA   | -0.0885                         | 0.0209    | -0.129     | -0.0476    | 0.941       | 0.914      | 0.968      | 0.00284  | 0.499      | loglinear | MAPK, PI3K, Transcriptional Regulation                           | NM_001675.2:1151    |

## References

- 1 Jensen, P. R., Gontang, E., Mafnas, C., Mincer, T. J. & Fenical, W. Culturable marine actinomycete diversity from tropical Pacific Ocean sediments. *Environ. Microbiol.* **7**, 1039-1048, doi:10.1111/j.1462-2920.2005.00785.x (2005).
- 2 Hong, K. *et al.* Actinomycetes for marine drug discovery isolated from mangrove soils and plants in China. *Mar. Drugs* **7**, 24-44, doi:10.3390/md7010024 (2009).
- 3 Woehrmann, M. H. *et al.* Large-scale cytological profiling for functional analysis of bioactive compounds. *Mol. Biosyst.* **9**, 2604-2617, doi:10.1039/c3mb70245f (2013).
- 4 Potts, M. B. *et al.* Using functional signature ontology (FUSION) to identify mechanisms of action for natural products. *Sci. Signal.* **6**, ra90, doi:10.1126/scisignal.2004657 (2013).
- 5 Wang, B. *et al.* Similarity network fusion for aggregating data types on a genomic scale. *Nat. Methods.* **11**, 333-337, doi:10.1038/nmeth.2810 (2014).
- 6 Kim, H. S. *et al.* Systematic identification of molecular subtype-selective vulnerabilities in non-small-cell lung cancer. *Cell* **155**, 552-566, doi:10.1016/j.cell.2013.09.041 (2013).
- 7 Kurita, K. L., Glassey, E. & Lington, R. G. Integration of high-content screening and untargeted metabolomics for comprehensive functional annotation of natural product libraries. *Proc. Natl. Acad. Sci. USA* **112**, 11999-12004, doi:10.1073/pnas.1507743112 (2015).
